# Supplementary material for: The role of glacial‐interglacial climate change in shaping the genetic structure of eastern subterranean termites in the southern Appalachian Mountains, USA
Source: Ecol Evol. 2019 Apr 1;9(8):4621–36. doi: 10.1002/ece3.5065 (PMC6476779; doi:10.1002/ece3.5065)
Supplement: Supplementary file 2 [file ECE3-9-4621-s002.xlsx]

## Sheet: SpatialData_Rf+Out
								Elevation		Occurrence Probability
Species	State	County	Site	Longitude	Latitude	Sequencing (S) Occurrence (O)	Collected	GPS	DEM	Present	MH	LGM	LIG
R. flavipes	Georgia	Gilmer	A03	-84.6381	34.7797	SO	2012-2014	764	740	0.827	0.516	0.21	0.022
R. flavipes	Georgia	Gordon	A04	-85.0654	34.573	SO	2012-2014	450	362	0.861	0.111	0.225	0.033
R. flavipes	Georgia	Chattooga	A09	-85.2427	34.5652	SO	2012-2014	408	392	0.867	0.18	0.228	0.033
R. flavipes	Alabama	Cleburne	A13	-85.7007	33.5606	SO	2012-2014	425	362	0.856	0.157	0.239	0.033
R. flavipes	Alabama	Clay	A14	-85.8173	33.4622	SO	2012-2014	485	445	0.858	0.531	0.229	0.026
R. flavipes	Alabama	Clay	A16	-86.072	33.2015	SO	2012-2014	291	367	0.837	0.511	0.25	0.026
R. flavipes	Georgia	Murray	A18	-84.7114	34.8787	SO	2012-2014	354	383	0.867	0.218	0.229	0.038
R. flavipes	Georgia	Gilmer	A21	-84.3388	34.7751	SO	2012-2014	730	637	0.866	0.753	0.249	0.033
R. flavipes	Georgia	Fannin	A22	-84.2509	34.6831	SO	2012-2014	810	745	0.848	0.679	0.22	0.023
R. flavipes	Tennessee	Sevier	A30	-83.5185	35.6568	SO	2012-2014	780	805	0.87	0.861	0.289	0.036
R. flavipes	Tennessee	Sevier	A31	-83.3572	35.7023	SO	2012-2014	653	740	0.869	0.869	0.281	0.037
R. flavipes	North Carolina	Swain	A32	-83.3108	35.5212	SO	2012-2014	666	712	0.832	0.829	0.304	0.042
R. flavipes	Tennessee	Cocke	A37	-83.2134	35.7714	SO	2012-2014	575	585	0.863	0.863	0.3	0.015
R. flavipes	Georgia	Murray	A40	-84.6914	34.7593	SO	2012-2014	804	745	0.766	0.35	0.198	0.022
R. flavipes	Alabama	Cleburne	A41	-85.4976	33.9186	SO	2012-2014	257	270	0.782	0.048	0.234	0.041
R. flavipes	Virginia	Giles	A52	-80.5451	37.3476	SO	2012-2014	1121	1116	0.77	0.592	0.639	0.007
R. flavipes	Virginia	Albemarle	A56	-78.7837	38.129	SO	2012-2014	814	749	0.801	0.513	0.365	0.006
R. flavipes	Virginia	Greene	A60	-78.6431	38.2912	SO	2012-2014	761	714	0.747	0.442	0.352	0.006
R. flavipes	Virginia	Rappahannock	A62	-78.1815	38.8051	SO	2012-2014	755	730	0.523	0.336	0.413	0.006
R. flavipes	Virginia	Madison	A64	-78.3406	38.6259	SO	2012-2014	1032	957	0.569	0.486	0.419	0.006
R. flavipes	Virginia	Augusta	A70	-79.3498	38.0405	SO	2012-2014	784	834	0.835	0.837	0.261	0.01
R. flavipes	Tennessee	Lawrence	A73	-87.5268	35.3938	SO	2012-2014	304	295	0.826	0.035	0.23	0.037
R. flavipes	Tennessee	Morgan	A75	-84.7448	36.1245	SO	2012-2014	378	393	0.864	0.2	0.221	0.038
R. flavipes	Tennessee	Morgan	A76	-84.4883	36.1361	SO	2012-2014	496	555	0.863	0.208	0.227	0.026
R. flavipes	Georgia	Dade	A85	-85.4997	34.8469	SO	2012-2014	315	455	0.856	0.143	0.214	0.025
R. flavipes	Mississippi	Tishomingo	A86	-88.193	34.605	SO	2012-2014	177	186	0.398	0.017	0.212	0.034
R. flavipes	Tennessee	Monroe	A87	-84.2476	35.3488	SO	2012-2014	327	343	0.869	0.267	0.305	0.036
R. flavipes	Tennessee	Monroe	A88	-84.1938	35.3453	SO	2012-2014	425	437	0.87	0.404	0.3	0.036
R. flavipes	North Carolina	Swain	A92	-83.5919	35.3297	SO	2012-2014	593	609	0.842	0.791	0.302	0.042
R. flavipes	North Carolina	Buncombe	A97	-82.4874	35.5954	SO	2012-2014	722	709	0.869	0.864	0.285	0.012
R. flavipes	West Virginia	Pendleton	A106	-79.3862	38.8237	SO	2012-2014	528	516	0.81	0.776	0.463	0.013
R. flavipes	West Virginia	Pendleton	A107	-79.3851	38.8259	SO	2012-2014	548	621	0.839	0.84	0.465	0.013
R. flavipes	West Virginia	Pendleton	A108	-79.4849	38.7269	SO	2012-2014	936	997	0.656	0.586	0.431	0.01
R. flavipes	Alabama	Clay	A117	-85.8066	33.471	SO	2012-2014	621	601	0.831	0.668	0.228	0.022
R. flavipes	Alabama	Clay	A124	-85.8732	33.4045	SO	2012-2014	460	440	0.849	0.587	0.24	0.025
R. flavipes	Alabama	Lawrence	A131	-87.3327	34.4198	SO	2012-2014	321	298	0.75	0.03	0.2	0.025
R. flavipes	Alabama	Winston	A133	-87.2768	34.1766	SO	2012-2014	248	228	0.686	0.04	0.218	0.033
R. flavipes	Alabama	DeKalb	A134	-85.5836	34.4554	SO	2012-2014	395	406	0.866	0.173	0.219	0.03
R. flavipes	Alabama	Cherokee	A137	-85.4573	33.9634	SO	2012-2014	300	290	0.832	0.058	0.233	0.039
R. flavipes	Alabama	Etowah	A138	-85.8468	34.1468	SO	2012-2014	188	197	0.505	0.018	0.215	0.033
R. flavipes	Georgia	Floyd	A139	-85.2643	34.1226	SO	2012-2014	232	258	0.814	0.057	0.228	0.032
R. flavipes	South Carolina	Oconee	A141	-83.1076	34.862	SO	2012-2014	536	536	0.846	0.709	0.282	0.026
R. flavipes	North Carolina	Jackson	A142	-83.0556	35.0138	SO	2012-2014	887	897	0.796	0.563	0.222	0.041
R. flavipes	South Carolina	Oconee	A143	-83.0893	34.9452	SO	2012-2014	744	716	0.821	0.736	0.285	0.032
R. flavipes	South Carolina	Oconee	A145	-83.2278	34.7278	SO	2012-2014	394	378	0.865	0.688	0.276	0.032
R. flavipes	South Carolina	Oconee	A146	-83.3124	34.7775	SO	2012-2014	469	441	0.858	0.735	0.298	0.033
R. flavipes	Georgia	Greene	A150	-83.2926	33.7209	O	2015	132	144	0.233	0.119	0.193	0.012
R. flavipes	Virginia	Scott	T1	-82.7454	36.7049	O	2016	460	485	0.856	0.382	0.281	0.012
R. flavipes	Virginia	Botetourt	T2	-79.6821	37.4798	O	2016	759	693	0.852	0.738	0.259	0.008
R. flavipes	Virginia	Smyth	T3	-81.5317	36.8846	O	2016	731	717	0.869	0.87	0.283	0.011
R. flavipes	Virginia	Patrick	T4	-80.0661	36.7894	O	2016	386	362	0.848	0.514	0.271	0.011
R. flavipes	North Carolina	Rockingham	T6	-79.9509	36.4319	O	2016	256	224	0.755	0.01	0.265	0.012
R. flavipes	Virginia	Bedford	T10	-79.5934	37.4409	O	2016	692	783	0.846	0.637	0.203	0.007
R. flavipes	Virginia	Bath	T12	-79.9771	37.9872	O	2016	508	530	0.817	0.651	0.254	0.016
R. flavipes	West Virginia	Pendleton	T13	-79.2019	38.6022	O	2016	591	579	0.785	0.708	0.479	0.013
R. flavipes	West Virginia	Hardy	T15	-78.9102	38.8937	O	2016	589	641	0.8	0.79	0.441	0.011
R. flavipes	Ohio	Gallia	T16	-82.4906	38.8139	O	2016	277	249	0.23	0.021	0.156	0.014
R. flavipes	Tennessee	Morgan	T17	-84.7587	36.0177	O	2016	572	549	0.818	0.142	0.224	0.025
R. flavipes	Tennessee	Scott	T19	-84.7143	36.474	O	2016	479	474	0.864	0.196	0.228	0.034
R. flavipes	Kentucky	McCreary	T20	-84.4575	36.8498	O	2016	412	405	0.864	0.131	0.247	0.037
R. flavipes	Kentucky	McCreary	T21	-84.4248	36.9102	O	2016	336	318	0.855	0.079	0.241	0.036
R. flavipes	Tennessee	Knox	T22	-83.764	36.1041	O	2016	399	391	0.833	0.045	0.243	0.026
R. flavipes	Tennessee	Union	T23	-83.8904	36.3752	O	2016	490	445	0.868	0.23	0.258	0.037
R. flavipes	Kentucky	Bell	T24	-83.6972	36.6035	O	2016	352	362	0.842	0.1	0.287	0.03
R. flavipes	Kentucky	Bell	T25	-83.7441	36.7281	O	2016	390	408	0.862	0.177	0.275	0.036
R. flavipes	Kentucky	Harlan	T26	-83.2143	36.9281	O	2016	767	769	0.858	0.726	0.279	0.026
R. flavipes	Tennessee	Sullivan	T27	-82.4869	36.491	O	2016	427	417	0.786	0.263	0.264	0.011
R. flavipes	Kentucky	Knott	T29	-82.9939	37.241	O	2016	318	388	0.821	0.107	0.272	0.014
R. flavipes	Georgia	Douglas	T31	-84.6363	33.7615	O	2016	295	287	0.541	0.051	0.14	0.007
R. flavipes	North Carolina	Buncombe	T32	-82.4913	35.6058	O	2016	770	736	0.86	0.865	0.283	0.011
R. flavipes	North Carolina	Henderson	T33	-82.7176	35.4476	O	2016	1205	1165	0.789	0.589	0.326	0.03
R. flavipes	North Carolina	Henderson	T34	-82.5896	35.2188	O	2016	809	794	0.855	0.768	0.249	0.025
R. flavipes	Tennessee	Monroe	T35	-84.2412	35.3431	O	2016	413	362	0.869	0.291	0.305	0.036
R. flavipes	Tennessee	Monroe	T36	-84.112	35.3967	O	2016	553	560	0.871	0.793	0.285	0.037
R. flavipes	Tennessee	Polk	T37	-84.3359	35.2079	O	2016	513	536	0.87	0.408	0.307	0.036
R. flavipes	Tennessee	Polk	T39	-84.6081	35.1482	O	2016	588	567	0.869	0.329	0.262	0.039
R. flavipes	North Carolina	Madison	T46	-82.8472	35.8528	O	2016	656	619	0.852	0.852	0.277	0.012
R. flavipes	Tennessee	Greene	T47	-82.8497	36.0837	O	2016	408	408	0.815	0.527	0.266	0.012
R. flavipes	Tennessee	Unicoi	T48	-82.4466	36.1038	O	2016	522	546	0.854	0.853	0.299	0.012
R. flavipes	Kentucky	Powell	T55	-83.6773	37.7791	O	2016	256	275	0.621	0.027	0.247	0.014
R. flavipes	Kentucky	Floyd	T57	-82.7283	37.7158	O	2016	213	241	0.569	0.072	0.266	0.013
R. flavipes	Kentucky	Lawrence	T58	-82.8253	38.06	O	2016	209	211	0.625	0.055	0.261	0.014
R. flavipes	West Virginia	Wayne	T59	-82.4262	38.3031	O	2016	186	204	0.737	0.02	0.187	0.014
R. flavipes	West Virginia	Wayne	T60	-82.3832	38.0251	O	2016	402	341	0.83	0.077	0.24	0.012
R. flavipes	West Virginia	Logan	T61	-82.0147	37.8888	O	2016	260	306	0.78	0.028	0.248	0.013
R. flavipes	West Virginia	Lincoln	T62	-81.8427	38.1875	O	2016	201	248	0.815	0.016	0.185	0.011
R. flavipes	West Virginia	Kanawha	T63	-81.6695	38.2612	O	2016	267	307	0.774	0.01	0.153	0.012
R. flavipes	West Virginia	Jackson	T64	-81.5756	38.652	O	2016	241	263	0.739	0.037	0.148	0.013
R. flavipes	West Virginia	Roane	T65	-81.3447	38.7753	O	2016	240	267	0.809	0.125	0.271	0.013
R. flavipes	West Virginia	Braxton	T66	-80.6589	38.6327	O	2016	394	419	0.859	0.389	0.273	0.014
R. flavipes	West Virginia	Summers	T68	-80.8312	37.5089	O	2016	550	557	0.822	0.765	0.258	0.011
Out-Group
R. malletei	Georgia	Walker	A06	-85.2163	34.6434	N/A	2012-2014	386	363
R. nelsonae	Alabama	Cleburne	A12	-85.6939	33.5716	N/A	2012-2014	328	316
R. virginicus	Georgia	Chattooga	A10	-85.2404	34.5642	N/A	2012-2014	427	361
R. virginicus	Georgia	White	A25	-83.7327	34.7419	N/A	2012-2014	766	753
R. virginicus	South Carolina	Oconee	A146	-83.3124	34.7775	N/A	2012-2014	469	441

## Sheet: GeneticData_Rf+Out
										Haplotype			Cluster	Genotype
Species	Site	Log No.	Indiv. No.	Indiv.	GenBank Accession - COI	GenBank Accession - COII	GenBank Accession - Eb14g	Longitude	Latitude	COI	COII	COI+COII	COI+COII	Eb14g	COI_seq	COII_seq	COI+COII_seq	Eb14g-1_seq	Eb14g-2_seq
R. flavipes	A03	1	1	RfA03_1	MK295355	MK295483	MK295225	-84.6381	34.7797	1	1	1	C	1,2	ACATCACTTAGAATACTAATTCGAACAGAACTAGGGCAACCCGGATCTCTAATTGGAGATGACCAGATCTACAACGTTATCGTTACTGCTCATGCATTCGTCATAATTTTCTTTATAGTCATACCAATCATGATTGGTGGATTCGGAAACTGATTAGTACCACTTATATTAGGAGCCCCAGACATGGCATTCCCACGAATAAACAACATAAGATTTTGATTACTCCCACCGTCATTAACATTACTACTTACTAGCAGAACAGTAGAAAGTGGAGCAGGGACAGGATGAACAGTCTACCCCCCTCTTGCGAGAGGTATTGCCCATGCAGGAGCATCCGTAGACTTAGCCATCTTCTCCTTACATCTAGCAGGTGTTTCATCAATTTTGGGAGCAGTAAAT…	TTCTTCCACGATCATACATTAATAATTATATTAATAATCATCACAACCGTTATATACATGATAACCACCCTACTTTGAAATAAACATACTAGACGATTCATACTAGAAGGACAACTAATTGAAACTACATGAACAATTGCACCAGCAATTATCTTAGTATTCATTGCAATACCATCCTTACGACTTCTATATCTAATAGACGAAATTCACAACCCAACAATAACCCTAAAAGCAGTGGGACATCAATGATACTGAAGATATGAATATTCAGACTTCACAAAATTAGAATTCGACTCTTACATAATCCCACAAGAGGAAAATCAAGCAAGAACTTTCCGACTACTAGACACAGATAATCGAATTGTACTACCCATAAATTCACCAATCCGACTAGTAGTG…	ACATCACTTAGAATACTAATTCGAACAGAACTAGGGCAACCCGGATCTCTAATTGGAGATGACCAGATCTACAACGTTATCGTTACTGCTCATGCATTCGTCATAATTTTCTTTATAGTCATACCAATCATGATTGGTGGATTCGGAAACTGATTAGTACCACTTATATTAGGAGCCCCAGACATGGCATTCCCACGAATAAACAACATAAGATTTTGATTACTCCCACCGTCATTAACATTACTACTTACTAGCAGAACAGTAGAAAGTGGAGCAGGGACAGGATGAACAGTCTACCCCCCTCTTGCGAGAGGTATTGCCCATGCAGGAGCATCCGTAGACTTAGCCATCTTCTCCTTACATCTAGCAGGTGTTTCATCAATTTTGGGAGCAGTAAAT…	AGTGTCATCTTTAAGTCACAACAACCCATTATTTAACTGATTTCTTACTAAATTTTGTACGTTACTAGGGCTGTGACTGATTACTTTCACTGCAAACTGAAACTACAACCGTCTGTATGAGGAACAAGTTACATTTTTTCACTGCTTAAAACAACGGCAGCCGAAGGGACATATTTGCACCAGTTCCATCCAGTCCAAACACACACATAACGATTTATCCAGACACATATCAACGTTATTACGTGACCATC	AGTGTCATCTTTAAGTCACAACAACCCATTATTTAACTGATTTCTTACTAAATTTTGTACGTTACTAGGGCTGTGACTGATTACTTTCACTGCAAACTGAAACTACAACCGTCTGTATGAGGAACAAGTTACATTTTTTCACTGCTTAAAACAACGGCAGCCGAAGGGACATATTTGCACCAGTTCCATCCAGTCCAAACACACACATAACGATTTTTCCAGACACATTTCAACGTTATTACGTGACCATC
R. flavipes	A03	1	2	RfA03_3	MK295356	MK295484	MK295226	-84.6381	34.7797	1	1	1	C	1,2	ACATCACTTAGAATACTAATTCGAACAGAACTAGGGCAACCCGGATCTCTAATTGGAGATGACCAGATCTACAACGTTATCGTTACTGCTCATGCATTCGTCATAATTTTCTTTATAGTCATACCAATCATGATTGGTGGATTCGGAAACTGATTAGTACCACTTATATTAGGAGCCCCAGACATGGCATTCCCACGAATAAACAACATAAGATTTTGATTACTCCCACCGTCATTAACATTACTACTTACTAGCAGAACAGTAGAAAGTGGAGCAGGGACAGGATGAACAGTCTACCCCCCTCTTGCGAGAGGTATTGCCCATGCAGGAGCATCCGTAGACTTAGCCATCTTCTCCTTACATCTAGCAGGTGTTTCATCAATTTTGGGAGCAGTAAAT…	TTCTTCCACGATCATACATTAATAATTATATTAATAATCATCACAACCGTTATATACATGATAACCACCCTACTTTGAAATAAACATACTAGACGATTCATACTAGAAGGACAACTAATTGAAACTACATGAACAATTGCACCAGCAATTATCTTAGTATTCATTGCAATACCATCCTTACGACTTCTATATCTAATAGACGAAATTCACAACCCAACAATAACCCTAAAAGCAGTGGGACATCAATGATACTGAAGATATGAATATTCAGACTTCACAAAATTAGAATTCGACTCTTACATAATCCCACAAGAGGAAAATCAAGCAAGAACTTTCCGACTACTAGACACAGATAATCGAATTGTACTACCCATAAATTCACCAATCCGACTAGTAGTG…	ACATCACTTAGAATACTAATTCGAACAGAACTAGGGCAACCCGGATCTCTAATTGGAGATGACCAGATCTACAACGTTATCGTTACTGCTCATGCATTCGTCATAATTTTCTTTATAGTCATACCAATCATGATTGGTGGATTCGGAAACTGATTAGTACCACTTATATTAGGAGCCCCAGACATGGCATTCCCACGAATAAACAACATAAGATTTTGATTACTCCCACCGTCATTAACATTACTACTTACTAGCAGAACAGTAGAAAGTGGAGCAGGGACAGGATGAACAGTCTACCCCCCTCTTGCGAGAGGTATTGCCCATGCAGGAGCATCCGTAGACTTAGCCATCTTCTCCTTACATCTAGCAGGTGTTTCATCAATTTTGGGAGCAGTAAAT…	AGTGTCATCTTTAAGTCACAACAACCCATTATTTAACTGATTTCTTACTAAATTTTGTACGTTACTAGGGCTGTGACTGATTACTTTCACTGCAAACTGAAACTACAACCGTCTGTATGAGGAACAAGTTACATTTTTTCACTGCTTAAAACAACGGCAGCCGAAGGGACATATTTGCACCAGTTCCATCCAGTCCAAACACACACATAACGATTTATCCAGACACATATCAACGTTATTACGTGACCATC	AGTGTCATCTTTAAGTCACAACAACCCATTATTTAACTGATTTCTTACTAAATTTTGTACGTTACTAGGGCTGTGACTGATTACTTTCACTGCAAACTGAAACTACAACCGTCTGTATGAGGAACAAGTTACATTTTTTCACTGCTTAAAACAACGGCAGCCGAAGGGACATATTTGCACCAGTTCCATCCAGTCCAAACACACACATAACGATTTTTCCAGACACATTTCAACGTTATTACGTGACCATC
R. flavipes	A04	2	3	RfA04_1	MK295357	MK295485	MK295227	-85.0654	34.573	1	1	1	C	1,2	ACATCACTTAGAATACTAATTCGAACAGAACTAGGGCAACCCGGATCTCTAATTGGAGATGACCAGATCTACAACGTTATCGTTACTGCTCATGCATTCGTCATAATTTTCTTTATAGTCATACCAATCATGATTGGTGGATTCGGAAACTGATTAGTACCACTTATATTAGGAGCCCCAGACATGGCATTCCCACGAATAAACAACATAAGATTTTGATTACTCCCACCGTCATTAACATTACTACTTACTAGCAGAACAGTAGAAAGTGGAGCAGGGACAGGATGAACAGTCTACCCCCCTCTTGCGAGAGGTATTGCCCATGCAGGAGCATCCGTAGACTTAGCCATCTTCTCCTTACATCTAGCAGGTGTTTCATCAATTTTGGGAGCAGTAAAT…	TTCTTCCACGATCATACATTAATAATTATATTAATAATCATCACAACCGTTATATACATGATAACCACCCTACTTTGAAATAAACATACTAGACGATTCATACTAGAAGGACAACTAATTGAAACTACATGAACAATTGCACCAGCAATTATCTTAGTATTCATTGCAATACCATCCTTACGACTTCTATATCTAATAGACGAAATTCACAACCCAACAATAACCCTAAAAGCAGTGGGACATCAATGATACTGAAGATATGAATATTCAGACTTCACAAAATTAGAATTCGACTCTTACATAATCCCACAAGAGGAAAATCAAGCAAGAACTTTCCGACTACTAGACACAGATAATCGAATTGTACTACCCATAAATTCACCAATCCGACTAGTAGTG…	ACATCACTTAGAATACTAATTCGAACAGAACTAGGGCAACCCGGATCTCTAATTGGAGATGACCAGATCTACAACGTTATCGTTACTGCTCATGCATTCGTCATAATTTTCTTTATAGTCATACCAATCATGATTGGTGGATTCGGAAACTGATTAGTACCACTTATATTAGGAGCCCCAGACATGGCATTCCCACGAATAAACAACATAAGATTTTGATTACTCCCACCGTCATTAACATTACTACTTACTAGCAGAACAGTAGAAAGTGGAGCAGGGACAGGATGAACAGTCTACCCCCCTCTTGCGAGAGGTATTGCCCATGCAGGAGCATCCGTAGACTTAGCCATCTTCTCCTTACATCTAGCAGGTGTTTCATCAATTTTGGGAGCAGTAAAT…	AGTGTCATCTTTAAGTCACAACAACCCATTATTTAACTGATTTCTTACTAAATTTTGTACGTTACTAGGGCTGTGACTGATTACTTTCACTGCAAACTGAAACTACAACCGTCTGTATGAGGAACAAGTTACATTTTTTCACTGCTTAAAACAACGGCAGCCGAAGGGACATATTTGCACCAGTTCCATCCAGTCCAAACACACACATAACGATTTATCCAGACACATATCAACGTTATTACGTGACCATC	AGTGTCATCTTTAAGTCACAACAACCCATTATTTAACTGATTTCTTACTAAATTTTGTACGTTACTAGGGCTGTGACTGATTACTTTCACTGCAAACTGAAACTACAACCGTCTGTATGAGGAACAAGTTACATTTTTTCACTGCTTAAAACAACGGCAGCCGAAGGGACATATTTGCACCAGTTCCATCCAGTCCAAACACACACATAACGATTTTTCCAGACACATTTCAACGTTATTACGTGACCATC
R. flavipes	A04	2	4	RfA04_2	MK295358	MK295486	MK295228	-85.0654	34.573	1	1	1	C	1,2	ACATCACTTAGAATACTAATTCGAACAGAACTAGGGCAACCCGGATCTCTAATTGGAGATGACCAGATCTACAACGTTATCGTTACTGCTCATGCATTCGTCATAATTTTCTTTATAGTCATACCAATCATGATTGGTGGATTCGGAAACTGATTAGTACCACTTATATTAGGAGCCCCAGACATGGCATTCCCACGAATAAACAACATAAGATTTTGATTACTCCCACCGTCATTAACATTACTACTTACTAGCAGAACAGTAGAAAGTGGAGCAGGGACAGGATGAACAGTCTACCCCCCTCTTGCGAGAGGTATTGCCCATGCAGGAGCATCCGTAGACTTAGCCATCTTCTCCTTACATCTAGCAGGTGTTTCATCAATTTTGGGAGCAGTAAAT…	TTCTTCCACGATCATACATTAATAATTATATTAATAATCATCACAACCGTTATATACATGATAACCACCCTACTTTGAAATAAACATACTAGACGATTCATACTAGAAGGACAACTAATTGAAACTACATGAACAATTGCACCAGCAATTATCTTAGTATTCATTGCAATACCATCCTTACGACTTCTATATCTAATAGACGAAATTCACAACCCAACAATAACCCTAAAAGCAGTGGGACATCAATGATACTGAAGATATGAATATTCAGACTTCACAAAATTAGAATTCGACTCTTACATAATCCCACAAGAGGAAAATCAAGCAAGAACTTTCCGACTACTAGACACAGATAATCGAATTGTACTACCCATAAATTCACCAATCCGACTAGTAGTG…	ACATCACTTAGAATACTAATTCGAACAGAACTAGGGCAACCCGGATCTCTAATTGGAGATGACCAGATCTACAACGTTATCGTTACTGCTCATGCATTCGTCATAATTTTCTTTATAGTCATACCAATCATGATTGGTGGATTCGGAAACTGATTAGTACCACTTATATTAGGAGCCCCAGACATGGCATTCCCACGAATAAACAACATAAGATTTTGATTACTCCCACCGTCATTAACATTACTACTTACTAGCAGAACAGTAGAAAGTGGAGCAGGGACAGGATGAACAGTCTACCCCCCTCTTGCGAGAGGTATTGCCCATGCAGGAGCATCCGTAGACTTAGCCATCTTCTCCTTACATCTAGCAGGTGTTTCATCAATTTTGGGAGCAGTAAAT…	AGTGTCATCTTTAAGTCACAACAACCCATTATTTAACTGATTTCTTACTAAATTTTGTACGTTACTAGGGCTGTGACTGATTACTTTCACTGCAAACTGAAACTACAACCGTCTGTATGAGGAACAAGTTACATTTTTTCACTGCTTAAAACAACGGCAGCCGAAGGGACATATTTGCACCAGTTCCATCCAGTCCAAACACACACATAACGATTTATCCAGACACATATCAACGTTATTACGTGACCATC	AGTGTCATCTTTAAGTCACAACAACCCATTATTTAACTGATTTCTTACTAAATTTTGTACGTTACTAGGGCTGTGACTGATTACTTTCACTGCAAACTGAAACTACAACCGTCTGTATGAGGAACAAGTTACATTTTTTCACTGCTTAAAACAACGGCAGCCGAAGGGACATATTTGCACCAGTTCCATCCAGTCCAAACACACACATAACGATTTTTCCAGACACATTTCAACGTTATTACGTGACCATC
R. flavipes	A04	2	5	RfA04_3	MK295359	MK295487	MK295229	-85.0654	34.573	1	1	1	C	1,2	ACATCACTTAGAATACTAATTCGAACAGAACTAGGGCAACCCGGATCTCTAATTGGAGATGACCAGATCTACAACGTTATCGTTACTGCTCATGCATTCGTCATAATTTTCTTTATAGTCATACCAATCATGATTGGTGGATTCGGAAACTGATTAGTACCACTTATATTAGGAGCCCCAGACATGGCATTCCCACGAATAAACAACATAAGATTTTGATTACTCCCACCGTCATTAACATTACTACTTACTAGCAGAACAGTAGAAAGTGGAGCAGGGACAGGATGAACAGTCTACCCCCCTCTTGCGAGAGGTATTGCCCATGCAGGAGCATCCGTAGACTTAGCCATCTTCTCCTTACATCTAGCAGGTGTTTCATCAATTTTGGGAGCAGTAAAT…	TTCTTCCACGATCATACATTAATAATTATATTAATAATCATCACAACCGTTATATACATGATAACCACCCTACTTTGAAATAAACATACTAGACGATTCATACTAGAAGGACAACTAATTGAAACTACATGAACAATTGCACCAGCAATTATCTTAGTATTCATTGCAATACCATCCTTACGACTTCTATATCTAATAGACGAAATTCACAACCCAACAATAACCCTAAAAGCAGTGGGACATCAATGATACTGAAGATATGAATATTCAGACTTCACAAAATTAGAATTCGACTCTTACATAATCCCACAAGAGGAAAATCAAGCAAGAACTTTCCGACTACTAGACACAGATAATCGAATTGTACTACCCATAAATTCACCAATCCGACTAGTAGTG…	ACATCACTTAGAATACTAATTCGAACAGAACTAGGGCAACCCGGATCTCTAATTGGAGATGACCAGATCTACAACGTTATCGTTACTGCTCATGCATTCGTCATAATTTTCTTTATAGTCATACCAATCATGATTGGTGGATTCGGAAACTGATTAGTACCACTTATATTAGGAGCCCCAGACATGGCATTCCCACGAATAAACAACATAAGATTTTGATTACTCCCACCGTCATTAACATTACTACTTACTAGCAGAACAGTAGAAAGTGGAGCAGGGACAGGATGAACAGTCTACCCCCCTCTTGCGAGAGGTATTGCCCATGCAGGAGCATCCGTAGACTTAGCCATCTTCTCCTTACATCTAGCAGGTGTTTCATCAATTTTGGGAGCAGTAAAT…	AGTGTCATCTTTAAGTCACAACAACCCATTATTTAACTGATTTCTTACTAAATTTTGTACGTTACTAGGGCTGTGACTGATTACTTTCACTGCAAACTGAAACTACAACCGTCTGTATGAGGAACAAGTTACATTTTTTCACTGCTTAAAACAACGGCAGCCGAAGGGACATATTTGCACCAGTTCCATCCAGTCCAAACACACACATAACGATTTATCCAGACACATATCAACGTTATTACGTGACCATC	AGTGTCATCTTTAAGTCACAACAACCCATTATTTAACTGATTTCTTACTAAATTTTGTACGTTACTAGGGCTGTGACTGATTACTTTCACTGCAAACTGAAACTACAACCGTCTGTATGAGGAACAAGTTACATTTTTTCACTGCTTAAAACAACGGCAGCCGAAGGGACATATTTGCACCAGTTCCATCCAGTCCAAACACACACATAACGATTTTTCCAGACACATTTCAACGTTATTACGTGACCATC
R. flavipes	A09	3	6	RfA09_1	MK295360	MK295488	MK295230	-85.2427	34.5652	2	2	2	C	1,2	ACATCACTTAGAATACTAATTCGAACAGAACTAGGGCAACCCGGATCTCTAATTGGAGATGACCAGATCTACAACGTTATCGTTACTGCTCATGCATTCGTCATAATTTTCTTTATGGTCATACCAATCATGATTGGTGGATTCGGAAACTGATTAGTACCACTTATATTAGGAGCCCCAGACATGGCATTCCCACGAATAAACAACATAAGATTTTGATTACTCCCACCGTCATTAACATTACTACTTACTAGCAGAACAGTAGAAAGTGGAGCAGGGACAGGATGAACAGTCTACCCCCCTCTTGCGAGAGGTATTGCCCATGCAGGAGCATCCGTAGACTTAGCCATCTTCTCCTTACATCTAGCAGGTGTTTCATCAATTTTGGGAGCAGTAAAT…	TTCTTCCACGATCATACATTAATAATTATATTAATAATCATCACAACCGTTATATACATGATAACCACCCTACTTTGAAATAAACATACTAGACGATTCATGCTAGAAGGACAACTAATTGAAACTACATGAACAATTGCACCAGCAATTATCTTAGTATTCATTGCAATACCATCCTTACGACTTCTATATCTAATAGACGAAATCCACAACCCAACAATAACCCTAAAAGCAGTGGGACATCAATGATACTGAAGATATGAATATTCAGACTTCACAAAATTAGAATTCGACTCTTACATAATCCCACAAGAGGAAAATCAAGCAAGAACTTTCCGACTACTAGACACAGATAATCGAATTGTACTACCCATAAATTCACCAATCCGACTAGTAGTG…	ACATCACTTAGAATACTAATTCGAACAGAACTAGGGCAACCCGGATCTCTAATTGGAGATGACCAGATCTACAACGTTATCGTTACTGCTCATGCATTCGTCATAATTTTCTTTATGGTCATACCAATCATGATTGGTGGATTCGGAAACTGATTAGTACCACTTATATTAGGAGCCCCAGACATGGCATTCCCACGAATAAACAACATAAGATTTTGATTACTCCCACCGTCATTAACATTACTACTTACTAGCAGAACAGTAGAAAGTGGAGCAGGGACAGGATGAACAGTCTACCCCCCTCTTGCGAGAGGTATTGCCCATGCAGGAGCATCCGTAGACTTAGCCATCTTCTCCTTACATCTAGCAGGTGTTTCATCAATTTTGGGAGCAGTAAAT…	AGTGTCATCTTTAAGTCACAACAACCCATTATTTAACTGATTTCTTACTAAATTTTGTACGTTACTAGGGCTGTGACTGATTACTTTCACTGCAAACTGAAACTACAACCGTCTGTATGAGGAACAAGTTACATTTTTTCACTGCTTAAAACAACGGCAGCCGAAGGGACATATTTGCACCAGTTCCATCCAGTCCAAACACACACATAACGATTTATCCAGACACATATCAACGTTATTACGTGACCATC	AGTGTCATCTTTAAGTCACAACAACCCATTATTTAACTGATTTCTTACTAAATTTTGTACGTTACTAGGGCTGTGACTGATTACTTTCACTGCAAACTGAAACTACAACCGTCTGTATGAGGAACAAGTTACATTTTTTCACTGCTTAAAACAACGGCAGCCGAAGGGACATATTTGCACCAGTTCCATCCAGTCCAAACACACACATAACGATTTTTCCAGACACATTTCAACGTTATTACGTGACCATC
R. flavipes	A13	4	7	RfA13_1	MK295361	MK295489	MK295231	-85.7007	33.5606	3	3	3	S	1,3	ACATCACTTAGAATACTAATTCGAACAGAACTAGGGCAACCCGGATCTCTAATTGGAGATGACCAGATCTATAACGTCATCGTTACTGCTCATGCATTCGTCATAATTTTCTTTATGGTCATACCAATCATGATTGGTGGATTCGGAAACTGACTAGTACCACTTATATTAGGGGCCCCAGACATAGCATTCCCACGAATAAACAACATAAGATTTTGATTACTACCACCATCATTAACTCTACTACTTACTAGCAGAACAGTAGAAAGTGGAGCAGGGACAGGATGAACAGTTTACCCCCCTCTTGCGAGAGGTATTGCCCACGCAGGAGCATCCGTAGACTTAGCCATCTTCTCCTTACATCTAGCAGGTGTTTCATCAATTTTGGGAGCAGTAAAT…	TTCTTCCACGATCATACATTAATAATCATATTAATAATCATCACAACCGTTATATACATAATAACCACCCTACTTTGAAATAAACACACCAGACGATTCATACTAGAAGGACAACTAATTGAAACTACATGAACAATTGCACCAGCAATCATCCTAGTATTCATTGCAATACCATCCTTACGACTTCTATATCTAATAGACGAAATCCACAACCCAACAATAACCCTAAAGGCAGTAGGACATCAGTGATACTGAAGATATGAATACTCAGACTTCACAAAATTAGAATTCGACTCTTACATAATCCCACAAGAGGAAAATCAAGCAAGAACTTTCCGACTACTAGACACAGATAATCGAATTGTACTACCCATAAATTCACCAATCCGACTGGTAGTG…	ACATCACTTAGAATACTAATTCGAACAGAACTAGGGCAACCCGGATCTCTAATTGGAGATGACCAGATCTATAACGTCATCGTTACTGCTCATGCATTCGTCATAATTTTCTTTATGGTCATACCAATCATGATTGGTGGATTCGGAAACTGACTAGTACCACTTATATTAGGGGCCCCAGACATAGCATTCCCACGAATAAACAACATAAGATTTTGATTACTACCACCATCATTAACTCTACTACTTACTAGCAGAACAGTAGAAAGTGGAGCAGGGACAGGATGAACAGTTTACCCCCCTCTTGCGAGAGGTATTGCCCACGCAGGAGCATCCGTAGACTTAGCCATCTTCTCCTTACATCTAGCAGGTGTTTCATCAATTTTGGGAGCAGTAAAT…	AGTGTCATCTTTAAGTCACAACAACCCATTATTTAACTGATTTCTTACTAAATTTTGTACGTTACTAGGGCTGTGACTGATTACTTTCACTGCAAACTGAAACTACAACCGTCTGTATGAGGAACAAGTTACATTTTTTCACTGCTTAAAACAACGGCAGCCGAAGGGACATATTTGCACCAGTTCCATCCAGTCCAAACACACACATAACGATTTATCCAGACACATATCAACGTTATTACGTGACCATC	AGTGTCATCTTTAAGTCACAACAACCCATTATTTAACTGATTTCTTACTAAATTTTGTACGTTACTAGGGCTGTGACTGATTACTTTCACTGCAAACTGAAACTACAACCGTCTGTATGAGGAACAAGTTACATTTTTTCACTGCTTAAAACAACGGCAGCCGACGGGACATATTTGCACCAGTTCCATCCAGTCCAAACACACACATAACGATTTTTCCAGACACATTTCAACGTTATTACGTGACCATC
R. flavipes	A14	5	8	RfA14_1	MK295362	MK295490	MK295232	-85.8173	33.4622	4	4	4	S	4,4	ACATCACTTAGAATACTAATTCGAACAGAACTAGGACAACCCGGATCTCTAATTGGAGATGACCAGATCTACAACGTTATCGTTACTGCTCATGCATTCGTCATAATTTTCTTTATGGTCATACCAATCATGATTGGTGGATTTGGAAACTGACTAGTACCACTTATATTAGGAGCCCCAGACATGGCATTCCCACGAATAAACAACATAAGATTTTGATTACTCCCACCATCATTAACATTACTACTTACTAGCAGAACAGTAGAAAGTGGAGCAGGGACAGGATGAACAGTTTACCCCCCTCTTGCGAGAGGTATTGCCCACGCAGGGGCATCCGTAGACTTAGCCATCTTCTCCTTACATCTAGCAGGTGTTTCATCAATTTTGGGAGCAGTAAAT…	TTCTTCCACGATCATACATTAATAATTATATTAATAATCATCACAACCGTTATATACATAATAACCACCCTACTTTGAAATAAACACACTAGACGATTCATACTAGAAGGACAATTAATTGAAACTACATGAACAATTGCACCAGCAATCATCCTAGTATTCATTGCAATACCATCCTTACGACTTCTATATCTAATAGACGAAATTCACAACCCAACAATAACCCTAAAAGCAGTAGGACATCAATGATACTGAAGATATGAGTACTCAGACTTCACAAAATTAGAATTCGACTCTTACATAATCCCGCAAGAGGAAAATCAAGAAAGAACTTTCCGACTACTAGACACAGATAATCGAATTGTACTACCCATAAATTCACCAATCCGACTGGTAGTG…	ACATCACTTAGAATACTAATTCGAACAGAACTAGGACAACCCGGATCTCTAATTGGAGATGACCAGATCTACAACGTTATCGTTACTGCTCATGCATTCGTCATAATTTTCTTTATGGTCATACCAATCATGATTGGTGGATTTGGAAACTGACTAGTACCACTTATATTAGGAGCCCCAGACATGGCATTCCCACGAATAAACAACATAAGATTTTGATTACTCCCACCATCATTAACATTACTACTTACTAGCAGAACAGTAGAAAGTGGAGCAGGGACAGGATGAACAGTTTACCCCCCTCTTGCGAGAGGTATTGCCCACGCAGGGGCATCCGTAGACTTAGCCATCTTCTCCTTACATCTAGCAGGTGTTTCATCAATTTTGGGAGCAGTAAAT…	AGTGTCATCTTTAAGTCACAACAACCCATTATTTAACTGATTTCTTACTAAATTTTGTACGTTACTAGGGCTGTGACTGATTACTTTCACTGCAAACTGAAACTACAACCGTCTGTATGAGGAACAAGTTACATTTTTTCACTGCTTAAAACAACGGCAGCCGACGGGACATATTTGCACCAGTTCCATCCAGTCCTAACACACACATAACGATTTTTCCAGACACATTTCAACGTTATTACGTGACCATC	AGTGTCATCTTTAAGTCACAACAACCCATTATTTAACTGATTTCTTACTAAATTTTGTACGTTACTAGGGCTGTGACTGATTACTTTCACTGCAAACTGAAACTACAACCGTCTGTATGAGGAACAAGTTACATTTTTTCACTGCTTAAAACAACGGCAGCCGACGGGACATATTTGCACCAGTTCCATCCAGTCCTAACACACACATAACGATTTTTCCAGACACATTTCAACGTTATTACGTGACCATC
R. flavipes	A14	5	9	RfA14_2	MK295363	MK295491	MK295233	-85.8173	33.4622	4	4	4	S	4,4	ACATCACTTAGAATACTAATTCGAACAGAACTAGGACAACCCGGATCTCTAATTGGAGATGACCAGATCTACAACGTTATCGTTACTGCTCATGCATTCGTCATAATTTTCTTTATGGTCATACCAATCATGATTGGTGGATTTGGAAACTGACTAGTACCACTTATATTAGGAGCCCCAGACATGGCATTCCCACGAATAAACAACATAAGATTTTGATTACTCCCACCATCATTAACATTACTACTTACTAGCAGAACAGTAGAAAGTGGAGCAGGGACAGGATGAACAGTTTACCCCCCTCTTGCGAGAGGTATTGCCCACGCAGGGGCATCCGTAGACTTAGCCATCTTCTCCTTACATCTAGCAGGTGTTTCATCAATTTTGGGAGCAGTAAAT…	TTCTTCCACGATCATACATTAATAATTATATTAATAATCATCACAACCGTTATATACATAATAACCACCCTACTTTGAAATAAACACACTAGACGATTCATACTAGAAGGACAATTAATTGAAACTACATGAACAATTGCACCAGCAATCATCCTAGTATTCATTGCAATACCATCCTTACGACTTCTATATCTAATAGACGAAATTCACAACCCAACAATAACCCTAAAAGCAGTAGGACATCAATGATACTGAAGATATGAGTACTCAGACTTCACAAAATTAGAATTCGACTCTTACATAATCCCGCAAGAGGAAAATCAAGAAAGAACTTTCCGACTACTAGACACAGATAATCGAATTGTACTACCCATAAATTCACCAATCCGACTGGTAGTG…	ACATCACTTAGAATACTAATTCGAACAGAACTAGGACAACCCGGATCTCTAATTGGAGATGACCAGATCTACAACGTTATCGTTACTGCTCATGCATTCGTCATAATTTTCTTTATGGTCATACCAATCATGATTGGTGGATTTGGAAACTGACTAGTACCACTTATATTAGGAGCCCCAGACATGGCATTCCCACGAATAAACAACATAAGATTTTGATTACTCCCACCATCATTAACATTACTACTTACTAGCAGAACAGTAGAAAGTGGAGCAGGGACAGGATGAACAGTTTACCCCCCTCTTGCGAGAGGTATTGCCCACGCAGGGGCATCCGTAGACTTAGCCATCTTCTCCTTACATCTAGCAGGTGTTTCATCAATTTTGGGAGCAGTAAAT…	AGTGTCATCTTTAAGTCACAACAACCCATTATTTAACTGATTTCTTACTAAATTTTGTACGTTACTAGGGCTGTGACTGATTACTTTCACTGCAAACTGAAACTACAACCGTCTGTATGAGGAACAAGTTACATTTTTTCACTGCTTAAAACAACGGCAGCCGACGGGACATATTTGCACCAGTTCCATCCAGTCCTAACACACACATAACGATTTTTCCAGACACATTTCAACGTTATTACGTGACCATC	AGTGTCATCTTTAAGTCACAACAACCCATTATTTAACTGATTTCTTACTAAATTTTGTACGTTACTAGGGCTGTGACTGATTACTTTCACTGCAAACTGAAACTACAACCGTCTGTATGAGGAACAAGTTACATTTTTTCACTGCTTAAAACAACGGCAGCCGACGGGACATATTTGCACCAGTTCCATCCAGTCCTAACACACACATAACGATTTTTCCAGACACATTTCAACGTTATTACGTGACCATC
R. flavipes	A14	5	10	RfA14_3	MK295364	MK295492	MK295234	-85.8173	33.4622	4	4	4	S	4,4	ACATCACTTAGAATACTAATTCGAACAGAACTAGGACAACCCGGATCTCTAATTGGAGATGACCAGATCTACAACGTTATCGTTACTGCTCATGCATTCGTCATAATTTTCTTTATGGTCATACCAATCATGATTGGTGGATTTGGAAACTGACTAGTACCACTTATATTAGGAGCCCCAGACATGGCATTCCCACGAATAAACAACATAAGATTTTGATTACTCCCACCATCATTAACATTACTACTTACTAGCAGAACAGTAGAAAGTGGAGCAGGGACAGGATGAACAGTTTACCCCCCTCTTGCGAGAGGTATTGCCCACGCAGGGGCATCCGTAGACTTAGCCATCTTCTCCTTACATCTAGCAGGTGTTTCATCAATTTTGGGAGCAGTAAAT…	TTCTTCCACGATCATACATTAATAATTATATTAATAATCATCACAACCGTTATATACATAATAACCACCCTACTTTGAAATAAACACACTAGACGATTCATACTAGAAGGACAATTAATTGAAACTACATGAACAATTGCACCAGCAATCATCCTAGTATTCATTGCAATACCATCCTTACGACTTCTATATCTAATAGACGAAATTCACAACCCAACAATAACCCTAAAAGCAGTAGGACATCAATGATACTGAAGATATGAGTACTCAGACTTCACAAAATTAGAATTCGACTCTTACATAATCCCGCAAGAGGAAAATCAAGAAAGAACTTTCCGACTACTAGACACAGATAATCGAATTGTACTACCCATAAATTCACCAATCCGACTGGTAGTG…	ACATCACTTAGAATACTAATTCGAACAGAACTAGGACAACCCGGATCTCTAATTGGAGATGACCAGATCTACAACGTTATCGTTACTGCTCATGCATTCGTCATAATTTTCTTTATGGTCATACCAATCATGATTGGTGGATTTGGAAACTGACTAGTACCACTTATATTAGGAGCCCCAGACATGGCATTCCCACGAATAAACAACATAAGATTTTGATTACTCCCACCATCATTAACATTACTACTTACTAGCAGAACAGTAGAAAGTGGAGCAGGGACAGGATGAACAGTTTACCCCCCTCTTGCGAGAGGTATTGCCCACGCAGGGGCATCCGTAGACTTAGCCATCTTCTCCTTACATCTAGCAGGTGTTTCATCAATTTTGGGAGCAGTAAAT…	AGTGTCATCTTTAAGTCACAACAACCCATTATTTAACTGATTTCTTACTAAATTTTGTACGTTACTAGGGCTGTGACTGATTACTTTCACTGCAAACTGAAACTACAACCGTCTGTATGAGGAACAAGTTACATTTTTTCACTGCTTAAAACAACGGCAGCCGACGGGACATATTTGCACCAGTTCCATCCAGTCCTAACACACACATAACGATTTTTCCAGACACATTTCAACGTTATTACGTGACCATC	AGTGTCATCTTTAAGTCACAACAACCCATTATTTAACTGATTTCTTACTAAATTTTGTACGTTACTAGGGCTGTGACTGATTACTTTCACTGCAAACTGAAACTACAACCGTCTGTATGAGGAACAAGTTACATTTTTTCACTGCTTAAAACAACGGCAGCCGACGGGACATATTTGCACCAGTTCCATCCAGTCCTAACACACACATAACGATTTTTCCAGACACATTTCAACGTTATTACGTGACCATC
R. flavipes	A16	6	11	RfA16_1	MK295365	MK295493	MK295235	-86.072	33.2015	3	3	3	S	3,5	ACATCACTTAGAATACTAATTCGAACAGAACTAGGGCAACCCGGATCTCTAATTGGAGATGACCAGATCTATAACGTCATCGTTACTGCTCATGCATTCGTCATAATTTTCTTTATGGTCATACCAATCATGATTGGTGGATTCGGAAACTGACTAGTACCACTTATATTAGGGGCCCCAGACATAGCATTCCCACGAATAAACAACATAAGATTTTGATTACTACCACCATCATTAACTCTACTACTTACTAGCAGAACAGTAGAAAGTGGAGCAGGGACAGGATGAACAGTTTACCCCCCTCTTGCGAGAGGTATTGCCCACGCAGGAGCATCCGTAGACTTAGCCATCTTCTCCTTACATCTAGCAGGTGTTTCATCAATTTTGGGAGCAGTAAAT…	TTCTTCCACGATCATACATTAATAATCATATTAATAATCATCACAACCGTTATATACATAATAACCACCCTACTTTGAAATAAACACACCAGACGATTCATACTAGAAGGACAACTAATTGAAACTACATGAACAATTGCACCAGCAATCATCCTAGTATTCATTGCAATACCATCCTTACGACTTCTATATCTAATAGACGAAATCCACAACCCAACAATAACCCTAAAGGCAGTAGGACATCAGTGATACTGAAGATATGAATACTCAGACTTCACAAAATTAGAATTCGACTCTTACATAATCCCACAAGAGGAAAATCAAGCAAGAACTTTCCGACTACTAGACACAGATAATCGAATTGTACTACCCATAAATTCACCAATCCGACTGGTAGTG…	ACATCACTTAGAATACTAATTCGAACAGAACTAGGGCAACCCGGATCTCTAATTGGAGATGACCAGATCTATAACGTCATCGTTACTGCTCATGCATTCGTCATAATTTTCTTTATGGTCATACCAATCATGATTGGTGGATTCGGAAACTGACTAGTACCACTTATATTAGGGGCCCCAGACATAGCATTCCCACGAATAAACAACATAAGATTTTGATTACTACCACCATCATTAACTCTACTACTTACTAGCAGAACAGTAGAAAGTGGAGCAGGGACAGGATGAACAGTTTACCCCCCTCTTGCGAGAGGTATTGCCCACGCAGGAGCATCCGTAGACTTAGCCATCTTCTCCTTACATCTAGCAGGTGTTTCATCAATTTTGGGAGCAGTAAAT…	AGTGTCATCTTTAAGTCACAACAACCCATTATTTAACTGATTTCTTACTAAATTTTGTACGTTACTAGGGCTGTGACTGATTACTTTCACTGCAAACTGAAACTACAACCGTCTGTATGAGGAACAAGTTACATTTTTTCACTGCTTAAAACAACGGCAGCCGACGGGACATATTTGCACCAGTTCCATCCAGTCCAAACACACACATAACGATTTTTCCAGACACATTTCAACGTTATTACGTGACCATC	AGTGTCATCTTTAAGTCACAACAACCCATTATTTAACTGATTTCTTACTAAATTTTGTACGTTACTAGGGCTGTGACTGATTACTTTCACTGCAAACTGAAACTACAACCGTCTGTATGAGGAACAAGTTACATTTTTTTACTGCTTAAAACAACGGCAGCCGACGGGACATATTTGCACCAGTTCCATCCAGTCCAAACACACACATAACGATTTTTCCAGACACATTTCAACGTTATTACGTGACCATC
R. flavipes	A16	6	12	RfA16_2	MK295366	MK295494	MK295236	-86.072	33.2015	3	3	3	S	3,5	ACATCACTTAGAATACTAATTCGAACAGAACTAGGGCAACCCGGATCTCTAATTGGAGATGACCAGATCTATAACGTCATCGTTACTGCTCATGCATTCGTCATAATTTTCTTTATGGTCATACCAATCATGATTGGTGGATTCGGAAACTGACTAGTACCACTTATATTAGGGGCCCCAGACATAGCATTCCCACGAATAAACAACATAAGATTTTGATTACTACCACCATCATTAACTCTACTACTTACTAGCAGAACAGTAGAAAGTGGAGCAGGGACAGGATGAACAGTTTACCCCCCTCTTGCGAGAGGTATTGCCCACGCAGGAGCATCCGTAGACTTAGCCATCTTCTCCTTACATCTAGCAGGTGTTTCATCAATTTTGGGAGCAGTAAAT…	TTCTTCCACGATCATACATTAATAATCATATTAATAATCATCACAACCGTTATATACATAATAACCACCCTACTTTGAAATAAACACACCAGACGATTCATACTAGAAGGACAACTAATTGAAACTACATGAACAATTGCACCAGCAATCATCCTAGTATTCATTGCAATACCATCCTTACGACTTCTATATCTAATAGACGAAATCCACAACCCAACAATAACCCTAAAGGCAGTAGGACATCAGTGATACTGAAGATATGAATACTCAGACTTCACAAAATTAGAATTCGACTCTTACATAATCCCACAAGAGGAAAATCAAGCAAGAACTTTCCGACTACTAGACACAGATAATCGAATTGTACTACCCATAAATTCACCAATCCGACTGGTAGTG…	ACATCACTTAGAATACTAATTCGAACAGAACTAGGGCAACCCGGATCTCTAATTGGAGATGACCAGATCTATAACGTCATCGTTACTGCTCATGCATTCGTCATAATTTTCTTTATGGTCATACCAATCATGATTGGTGGATTCGGAAACTGACTAGTACCACTTATATTAGGGGCCCCAGACATAGCATTCCCACGAATAAACAACATAAGATTTTGATTACTACCACCATCATTAACTCTACTACTTACTAGCAGAACAGTAGAAAGTGGAGCAGGGACAGGATGAACAGTTTACCCCCCTCTTGCGAGAGGTATTGCCCACGCAGGAGCATCCGTAGACTTAGCCATCTTCTCCTTACATCTAGCAGGTGTTTCATCAATTTTGGGAGCAGTAAAT…	AGTGTCATCTTTAAGTCACAACAACCCATTATTTAACTGATTTCTTACTAAATTTTGTACGTTACTAGGGCTGTGACTGATTACTTTCACTGCAAACTGAAACTACAACCGTCTGTATGAGGAACAAGTTACATTTTTTCACTGCTTAAAACAACGGCAGCCGACGGGACATATTTGCACCAGTTCCATCCAGTCCAAACACACACATAACGATTTTTCCAGACACATTTCAACGTTATTACGTGACCATC	AGTGTCATCTTTAAGTCACAACAACCCATTATTTAACTGATTTCTTACTAAATTTTGTACGTTACTAGGGCTGTGACTGATTACTTTCACTGCAAACTGAAACTACAACCGTCTGTATGAGGAACAAGTTACATTTTTTTACTGCTTAAAACAACGGCAGCCGACGGGACATATTTGCACCAGTTCCATCCAGTCCAAACACACACATAACGATTTTTCCAGACACATTTCAACGTTATTACGTGACCATC
R. flavipes	A16	6	13	RfA16_3	MK295367	MK295495	MK295237	-86.072	33.2015	3	3	3	S	3,5	ACATCACTTAGAATACTAATTCGAACAGAACTAGGGCAACCCGGATCTCTAATTGGAGATGACCAGATCTATAACGTCATCGTTACTGCTCATGCATTCGTCATAATTTTCTTTATGGTCATACCAATCATGATTGGTGGATTCGGAAACTGACTAGTACCACTTATATTAGGGGCCCCAGACATAGCATTCCCACGAATAAACAACATAAGATTTTGATTACTACCACCATCATTAACTCTACTACTTACTAGCAGAACAGTAGAAAGTGGAGCAGGGACAGGATGAACAGTTTACCCCCCTCTTGCGAGAGGTATTGCCCACGCAGGAGCATCCGTAGACTTAGCCATCTTCTCCTTACATCTAGCAGGTGTTTCATCAATTTTGGGAGCAGTAAAT…	TTCTTCCACGATCATACATTAATAATCATATTAATAATCATCACAACCGTTATATACATAATAACCACCCTACTTTGAAATAAACACACCAGACGATTCATACTAGAAGGACAACTAATTGAAACTACATGAACAATTGCACCAGCAATCATCCTAGTATTCATTGCAATACCATCCTTACGACTTCTATATCTAATAGACGAAATCCACAACCCAACAATAACCCTAAAGGCAGTAGGACATCAGTGATACTGAAGATATGAATACTCAGACTTCACAAAATTAGAATTCGACTCTTACATAATCCCACAAGAGGAAAATCAAGCAAGAACTTTCCGACTACTAGACACAGATAATCGAATTGTACTACCCATAAATTCACCAATCCGACTGGTAGTG…	ACATCACTTAGAATACTAATTCGAACAGAACTAGGGCAACCCGGATCTCTAATTGGAGATGACCAGATCTATAACGTCATCGTTACTGCTCATGCATTCGTCATAATTTTCTTTATGGTCATACCAATCATGATTGGTGGATTCGGAAACTGACTAGTACCACTTATATTAGGGGCCCCAGACATAGCATTCCCACGAATAAACAACATAAGATTTTGATTACTACCACCATCATTAACTCTACTACTTACTAGCAGAACAGTAGAAAGTGGAGCAGGGACAGGATGAACAGTTTACCCCCCTCTTGCGAGAGGTATTGCCCACGCAGGAGCATCCGTAGACTTAGCCATCTTCTCCTTACATCTAGCAGGTGTTTCATCAATTTTGGGAGCAGTAAAT…	AGTGTCATCTTTAAGTCACAACAACCCATTATTTAACTGATTTCTTACTAAATTTTGTACGTTACTAGGGCTGTGACTGATTACTTTCACTGCAAACTGAAACTACAACCGTCTGTATGAGGAACAAGTTACATTTTTTCACTGCTTAAAACAACGGCAGCCGACGGGACATATTTGCACCAGTTCCATCCAGTCCAAACACACACATAACGATTTTTCCAGACACATTTCAACGTTATTACGTGACCATC	AGTGTCATCTTTAAGTCACAACAACCCATTATTTAACTGATTTCTTACTAAATTTTGTACGTTACTAGGGCTGTGACTGATTACTTTCACTGCAAACTGAAACTACAACCGTCTGTATGAGGAACAAGTTACATTTTTTTACTGCTTAAAACAACGGCAGCCGACGGGACATATTTGCACCAGTTCCATCCAGTCCAAACACACACATAACGATTTTTCCAGACACATTTCAACGTTATTACGTGACCATC
R. flavipes	A18	7	14	RfA18_1	MK295368	MK295496	MK295238	-84.7114	34.8787	5	5	5	C	1,3	ACATCACTTAGAATACTAATTCGAACAGAACTAGGGCAACCCGGATCTCTAATTGGAGATGACCAGATCTACAACGTTATCGTTACTGCTCATGCATTCGTCATAATTTTCTTTATAGTCATACCAATCATGATTGGTGGATTCGGAAACTGATTAGTACCACTTATATTAGGAGCCCCAGACATGGCATTCCCACGAATAAACAACATAAGATTTTGATTACTCCCACCGTCATTAACATTACTACTTACTAGCAGAACAGTAGAAAGTGGAGCAGGGACAGGATGAACAGTCTACCCCCCTCTTGCGAGAGGTATTGCCCATGCAGGAGCATCCGTAGACTTAGCCATCTTCTCCTTGCATCTAGCAGGTGTTTCATCAATTTTGGGAGCAGTAAAT…	TTCTTCCACGATCATACATTAATAATTATATTAATAATCATCACAACCGTTATATACATGATAACCACCCTACTTTGAAATAAACATACTAGACGATTCATACTAGAAGGACAACTAATTGAAACTACATGAACAATTGCACCAGCAATTATCTTAGTATTCATTGCAATACCATCCTTACGACTTCTATATCTAATAGACGAAATCCACAACCCAACAATAACCCTAAAAGCAGTGGGACATCAATGATACTGAAGATATGAATATTCAGACTTCACAAAATTAGAATTCGACTCTTACATAATCCCACAAGAGGAAAATCAAGCAAGAACTTTCCGACTACTAGACACAGATAATCGAATTGTACTACCCATAAATTCACCAATCCGACTAGTAGTG…	ACATCACTTAGAATACTAATTCGAACAGAACTAGGGCAACCCGGATCTCTAATTGGAGATGACCAGATCTACAACGTTATCGTTACTGCTCATGCATTCGTCATAATTTTCTTTATAGTCATACCAATCATGATTGGTGGATTCGGAAACTGATTAGTACCACTTATATTAGGAGCCCCAGACATGGCATTCCCACGAATAAACAACATAAGATTTTGATTACTCCCACCGTCATTAACATTACTACTTACTAGCAGAACAGTAGAAAGTGGAGCAGGGACAGGATGAACAGTCTACCCCCCTCTTGCGAGAGGTATTGCCCATGCAGGAGCATCCGTAGACTTAGCCATCTTCTCCTTGCATCTAGCAGGTGTTTCATCAATTTTGGGAGCAGTAAAT…	AGTGTCATCTTTAAGTCACAACAACCCATTATTTAACTGATTTCTTACTAAATTTTGTACGTTACTAGGGCTGTGACTGATTACTTTCACTGCAAACTGAAACTACAACCGTCTGTATGAGGAACAAGTTACATTTTTTCACTGCTTAAAACAACGGCAGCCGAAGGGACATATTTGCACCAGTTCCATCCAGTCCAAACACACACATAACGATTTATCCAGACACATATCAACGTTATTACGTGACCATC	AGTGTCATCTTTAAGTCACAACAACCCATTATTTAACTGATTTCTTACTAAATTTTGTACGTTACTAGGGCTGTGACTGATTACTTTCACTGCAAACTGAAACTACAACCGTCTGTATGAGGAACAAGTTACATTTTTTCACTGCTTAAAACAACGGCAGCCGACGGGACATATTTGCACCAGTTCCATCCAGTCCAAACACACACATAACGATTTTTCCAGACACATTTCAACGTTATTACGTGACCATC
R. flavipes	A18	7	15	RfA18_2	MK295369	MK295497	MK295239	-84.7114	34.8787	5	5	5	C	1,3	ACATCACTTAGAATACTAATTCGAACAGAACTAGGGCAACCCGGATCTCTAATTGGAGATGACCAGATCTACAACGTTATCGTTACTGCTCATGCATTCGTCATAATTTTCTTTATAGTCATACCAATCATGATTGGTGGATTCGGAAACTGATTAGTACCACTTATATTAGGAGCCCCAGACATGGCATTCCCACGAATAAACAACATAAGATTTTGATTACTCCCACCGTCATTAACATTACTACTTACTAGCAGAACAGTAGAAAGTGGAGCAGGGACAGGATGAACAGTCTACCCCCCTCTTGCGAGAGGTATTGCCCATGCAGGAGCATCCGTAGACTTAGCCATCTTCTCCTTGCATCTAGCAGGTGTTTCATCAATTTTGGGAGCAGTAAAT…	TTCTTCCACGATCATACATTAATAATTATATTAATAATCATCACAACCGTTATATACATGATAACCACCCTACTTTGAAATAAACATACTAGACGATTCATACTAGAAGGACAACTAATTGAAACTACATGAACAATTGCACCAGCAATTATCTTAGTATTCATTGCAATACCATCCTTACGACTTCTATATCTAATAGACGAAATCCACAACCCAACAATAACCCTAAAAGCAGTGGGACATCAATGATACTGAAGATATGAATATTCAGACTTCACAAAATTAGAATTCGACTCTTACATAATCCCACAAGAGGAAAATCAAGCAAGAACTTTCCGACTACTAGACACAGATAATCGAATTGTACTACCCATAAATTCACCAATCCGACTAGTAGTG…	ACATCACTTAGAATACTAATTCGAACAGAACTAGGGCAACCCGGATCTCTAATTGGAGATGACCAGATCTACAACGTTATCGTTACTGCTCATGCATTCGTCATAATTTTCTTTATAGTCATACCAATCATGATTGGTGGATTCGGAAACTGATTAGTACCACTTATATTAGGAGCCCCAGACATGGCATTCCCACGAATAAACAACATAAGATTTTGATTACTCCCACCGTCATTAACATTACTACTTACTAGCAGAACAGTAGAAAGTGGAGCAGGGACAGGATGAACAGTCTACCCCCCTCTTGCGAGAGGTATTGCCCATGCAGGAGCATCCGTAGACTTAGCCATCTTCTCCTTGCATCTAGCAGGTGTTTCATCAATTTTGGGAGCAGTAAAT…	AGTGTCATCTTTAAGTCACAACAACCCATTATTTAACTGATTTCTTACTAAATTTTGTACGTTACTAGGGCTGTGACTGATTACTTTCACTGCAAACTGAAACTACAACCGTCTGTATGAGGAACAAGTTACATTTTTTCACTGCTTAAAACAACGGCAGCCGAAGGGACATATTTGCACCAGTTCCATCCAGTCCAAACACACACATAACGATTTATCCAGACACATATCAACGTTATTACGTGACCATC	AGTGTCATCTTTAAGTCACAACAACCCATTATTTAACTGATTTCTTACTAAATTTTGTACGTTACTAGGGCTGTGACTGATTACTTTCACTGCAAACTGAAACTACAACCGTCTGTATGAGGAACAAGTTACATTTTTTCACTGCTTAAAACAACGGCAGCCGACGGGACATATTTGCACCAGTTCCATCCAGTCCAAACACACACATAACGATTTTTCCAGACACATTTCAACGTTATTACGTGACCATC
R. flavipes	A18	7	16	RfA18_3	MK295370	MK295498	MK295240	-84.7114	34.8787	5	5	5	C	1,3	ACATCACTTAGAATACTAATTCGAACAGAACTAGGGCAACCCGGATCTCTAATTGGAGATGACCAGATCTACAACGTTATCGTTACTGCTCATGCATTCGTCATAATTTTCTTTATAGTCATACCAATCATGATTGGTGGATTCGGAAACTGATTAGTACCACTTATATTAGGAGCCCCAGACATGGCATTCCCACGAATAAACAACATAAGATTTTGATTACTCCCACCGTCATTAACATTACTACTTACTAGCAGAACAGTAGAAAGTGGAGCAGGGACAGGATGAACAGTCTACCCCCCTCTTGCGAGAGGTATTGCCCATGCAGGAGCATCCGTAGACTTAGCCATCTTCTCCTTGCATCTAGCAGGTGTTTCATCAATTTTGGGAGCAGTAAAT…	TTCTTCCACGATCATACATTAATAATTATATTAATAATCATCACAACCGTTATATACATGATAACCACCCTACTTTGAAATAAACATACTAGACGATTCATACTAGAAGGACAACTAATTGAAACTACATGAACAATTGCACCAGCAATTATCTTAGTATTCATTGCAATACCATCCTTACGACTTCTATATCTAATAGACGAAATCCACAACCCAACAATAACCCTAAAAGCAGTGGGACATCAATGATACTGAAGATATGAATATTCAGACTTCACAAAATTAGAATTCGACTCTTACATAATCCCACAAGAGGAAAATCAAGCAAGAACTTTCCGACTACTAGACACAGATAATCGAATTGTACTACCCATAAATTCACCAATCCGACTAGTAGTG…	ACATCACTTAGAATACTAATTCGAACAGAACTAGGGCAACCCGGATCTCTAATTGGAGATGACCAGATCTACAACGTTATCGTTACTGCTCATGCATTCGTCATAATTTTCTTTATAGTCATACCAATCATGATTGGTGGATTCGGAAACTGATTAGTACCACTTATATTAGGAGCCCCAGACATGGCATTCCCACGAATAAACAACATAAGATTTTGATTACTCCCACCGTCATTAACATTACTACTTACTAGCAGAACAGTAGAAAGTGGAGCAGGGACAGGATGAACAGTCTACCCCCCTCTTGCGAGAGGTATTGCCCATGCAGGAGCATCCGTAGACTTAGCCATCTTCTCCTTGCATCTAGCAGGTGTTTCATCAATTTTGGGAGCAGTAAAT…	AGTGTCATCTTTAAGTCACAACAACCCATTATTTAACTGATTTCTTACTAAATTTTGTACGTTACTAGGGCTGTGACTGATTACTTTCACTGCAAACTGAAACTACAACCGTCTGTATGAGGAACAAGTTACATTTTTTCACTGCTTAAAACAACGGCAGCCGAAGGGACATATTTGCACCAGTTCCATCCAGTCCAAACACACACATAACGATTTATCCAGACACATATCAACGTTATTACGTGACCATC	AGTGTCATCTTTAAGTCACAACAACCCATTATTTAACTGATTTCTTACTAAATTTTGTACGTTACTAGGGCTGTGACTGATTACTTTCACTGCAAACTGAAACTACAACCGTCTGTATGAGGAACAAGTTACATTTTTTCACTGCTTAAAACAACGGCAGCCGACGGGACATATTTGCACCAGTTCCATCCAGTCCAAACACACACATAACGATTTTTCCAGACACATTTCAACGTTATTACGTGACCATC
R. flavipes	A21	8	17	RfA21_1	MK295371	MK295499	MK295241	-84.3388	34.7751	1	5	6	C	1,2	ACATCACTTAGAATACTAATTCGAACAGAACTAGGGCAACCCGGATCTCTAATTGGAGATGACCAGATCTACAACGTTATCGTTACTGCTCATGCATTCGTCATAATTTTCTTTATAGTCATACCAATCATGATTGGTGGATTCGGAAACTGATTAGTACCACTTATATTAGGAGCCCCAGACATGGCATTCCCACGAATAAACAACATAAGATTTTGATTACTCCCACCGTCATTAACATTACTACTTACTAGCAGAACAGTAGAAAGTGGAGCAGGGACAGGATGAACAGTCTACCCCCCTCTTGCGAGAGGTATTGCCCATGCAGGAGCATCCGTAGACTTAGCCATCTTCTCCTTACATCTAGCAGGTGTTTCATCAATTTTGGGAGCAGTAAAT…	TTCTTCCACGATCATACATTAATAATTATATTAATAATCATCACAACCGTTATATACATGATAACCACCCTACTTTGAAATAAACATACTAGACGATTCATACTAGAAGGACAACTAATTGAAACTACATGAACAATTGCACCAGCAATTATCTTAGTATTCATTGCAATACCATCCTTACGACTTCTATATCTAATAGACGAAATCCACAACCCAACAATAACCCTAAAAGCAGTGGGACATCAATGATACTGAAGATATGAATATTCAGACTTCACAAAATTAGAATTCGACTCTTACATAATCCCACAAGAGGAAAATCAAGCAAGAACTTTCCGACTACTAGACACAGATAATCGAATTGTACTACCCATAAATTCACCAATCCGACTAGTAGTG…	ACATCACTTAGAATACTAATTCGAACAGAACTAGGGCAACCCGGATCTCTAATTGGAGATGACCAGATCTACAACGTTATCGTTACTGCTCATGCATTCGTCATAATTTTCTTTATAGTCATACCAATCATGATTGGTGGATTCGGAAACTGATTAGTACCACTTATATTAGGAGCCCCAGACATGGCATTCCCACGAATAAACAACATAAGATTTTGATTACTCCCACCGTCATTAACATTACTACTTACTAGCAGAACAGTAGAAAGTGGAGCAGGGACAGGATGAACAGTCTACCCCCCTCTTGCGAGAGGTATTGCCCATGCAGGAGCATCCGTAGACTTAGCCATCTTCTCCTTACATCTAGCAGGTGTTTCATCAATTTTGGGAGCAGTAAAT…	AGTGTCATCTTTAAGTCACAACAACCCATTATTTAACTGATTTCTTACTAAATTTTGTACGTTACTAGGGCTGTGACTGATTACTTTCACTGCAAACTGAAACTACAACCGTCTGTATGAGGAACAAGTTACATTTTTTCACTGCTTAAAACAACGGCAGCCGAAGGGACATATTTGCACCAGTTCCATCCAGTCCAAACACACACATAACGATTTATCCAGACACATATCAACGTTATTACGTGACCATC	AGTGTCATCTTTAAGTCACAACAACCCATTATTTAACTGATTTCTTACTAAATTTTGTACGTTACTAGGGCTGTGACTGATTACTTTCACTGCAAACTGAAACTACAACCGTCTGTATGAGGAACAAGTTACATTTTTTCACTGCTTAAAACAACGGCAGCCGAAGGGACATATTTGCACCAGTTCCATCCAGTCCAAACACACACATAACGATTTTTCCAGACACATTTCAACGTTATTACGTGACCATC
R. flavipes	A21	8	18	RfA21_2	MK295372	MK295500	MK295242	-84.3388	34.7751	1	5	6	C	1,2	ACATCACTTAGAATACTAATTCGAACAGAACTAGGGCAACCCGGATCTCTAATTGGAGATGACCAGATCTACAACGTTATCGTTACTGCTCATGCATTCGTCATAATTTTCTTTATAGTCATACCAATCATGATTGGTGGATTCGGAAACTGATTAGTACCACTTATATTAGGAGCCCCAGACATGGCATTCCCACGAATAAACAACATAAGATTTTGATTACTCCCACCGTCATTAACATTACTACTTACTAGCAGAACAGTAGAAAGTGGAGCAGGGACAGGATGAACAGTCTACCCCCCTCTTGCGAGAGGTATTGCCCATGCAGGAGCATCCGTAGACTTAGCCATCTTCTCCTTACATCTAGCAGGTGTTTCATCAATTTTGGGAGCAGTAAAT…	TTCTTCCACGATCATACATTAATAATTATATTAATAATCATCACAACCGTTATATACATGATAACCACCCTACTTTGAAATAAACATACTAGACGATTCATACTAGAAGGACAACTAATTGAAACTACATGAACAATTGCACCAGCAATTATCTTAGTATTCATTGCAATACCATCCTTACGACTTCTATATCTAATAGACGAAATCCACAACCCAACAATAACCCTAAAAGCAGTGGGACATCAATGATACTGAAGATATGAATATTCAGACTTCACAAAATTAGAATTCGACTCTTACATAATCCCACAAGAGGAAAATCAAGCAAGAACTTTCCGACTACTAGACACAGATAATCGAATTGTACTACCCATAAATTCACCAATCCGACTAGTAGTG…	ACATCACTTAGAATACTAATTCGAACAGAACTAGGGCAACCCGGATCTCTAATTGGAGATGACCAGATCTACAACGTTATCGTTACTGCTCATGCATTCGTCATAATTTTCTTTATAGTCATACCAATCATGATTGGTGGATTCGGAAACTGATTAGTACCACTTATATTAGGAGCCCCAGACATGGCATTCCCACGAATAAACAACATAAGATTTTGATTACTCCCACCGTCATTAACATTACTACTTACTAGCAGAACAGTAGAAAGTGGAGCAGGGACAGGATGAACAGTCTACCCCCCTCTTGCGAGAGGTATTGCCCATGCAGGAGCATCCGTAGACTTAGCCATCTTCTCCTTACATCTAGCAGGTGTTTCATCAATTTTGGGAGCAGTAAAT…	AGTGTCATCTTTAAGTCACAACAACCCATTATTTAACTGATTTCTTACTAAATTTTGTACGTTACTAGGGCTGTGACTGATTACTTTCACTGCAAACTGAAACTACAACCGTCTGTATGAGGAACAAGTTACATTTTTTCACTGCTTAAAACAACGGCAGCCGAAGGGACATATTTGCACCAGTTCCATCCAGTCCAAACACACACATAACGATTTATCCAGACACATATCAACGTTATTACGTGACCATC	AGTGTCATCTTTAAGTCACAACAACCCATTATTTAACTGATTTCTTACTAAATTTTGTACGTTACTAGGGCTGTGACTGATTACTTTCACTGCAAACTGAAACTACAACCGTCTGTATGAGGAACAAGTTACATTTTTTCACTGCTTAAAACAACGGCAGCCGAAGGGACATATTTGCACCAGTTCCATCCAGTCCAAACACACACATAACGATTTTTCCAGACACATTTCAACGTTATTACGTGACCATC
R. flavipes	A21	8	19	RfA21_3	MK295373	MK295501	MK295243	-84.3388	34.7751	1	5	6	C	1,2	ACATCACTTAGAATACTAATTCGAACAGAACTAGGGCAACCCGGATCTCTAATTGGAGATGACCAGATCTACAACGTTATCGTTACTGCTCATGCATTCGTCATAATTTTCTTTATAGTCATACCAATCATGATTGGTGGATTCGGAAACTGATTAGTACCACTTATATTAGGAGCCCCAGACATGGCATTCCCACGAATAAACAACATAAGATTTTGATTACTCCCACCGTCATTAACATTACTACTTACTAGCAGAACAGTAGAAAGTGGAGCAGGGACAGGATGAACAGTCTACCCCCCTCTTGCGAGAGGTATTGCCCATGCAGGAGCATCCGTAGACTTAGCCATCTTCTCCTTACATCTAGCAGGTGTTTCATCAATTTTGGGAGCAGTAAAT…	TTCTTCCACGATCATACATTAATAATTATATTAATAATCATCACAACCGTTATATACATGATAACCACCCTACTTTGAAATAAACATACTAGACGATTCATACTAGAAGGACAACTAATTGAAACTACATGAACAATTGCACCAGCAATTATCTTAGTATTCATTGCAATACCATCCTTACGACTTCTATATCTAATAGACGAAATCCACAACCCAACAATAACCCTAAAAGCAGTGGGACATCAATGATACTGAAGATATGAATATTCAGACTTCACAAAATTAGAATTCGACTCTTACATAATCCCACAAGAGGAAAATCAAGCAAGAACTTTCCGACTACTAGACACAGATAATCGAATTGTACTACCCATAAATTCACCAATCCGACTAGTAGTG…	ACATCACTTAGAATACTAATTCGAACAGAACTAGGGCAACCCGGATCTCTAATTGGAGATGACCAGATCTACAACGTTATCGTTACTGCTCATGCATTCGTCATAATTTTCTTTATAGTCATACCAATCATGATTGGTGGATTCGGAAACTGATTAGTACCACTTATATTAGGAGCCCCAGACATGGCATTCCCACGAATAAACAACATAAGATTTTGATTACTCCCACCGTCATTAACATTACTACTTACTAGCAGAACAGTAGAAAGTGGAGCAGGGACAGGATGAACAGTCTACCCCCCTCTTGCGAGAGGTATTGCCCATGCAGGAGCATCCGTAGACTTAGCCATCTTCTCCTTACATCTAGCAGGTGTTTCATCAATTTTGGGAGCAGTAAAT…	AGTGTCATCTTTAAGTCACAACAACCCATTATTTAACTGATTTCTTACTAAATTTTGTACGTTACTAGGGCTGTGACTGATTACTTTCACTGCAAACTGAAACTACAACCGTCTGTATGAGGAACAAGTTACATTTTTTCACTGCTTAAAACAACGGCAGCCGAAGGGACATATTTGCACCAGTTCCATCCAGTCCAAACACACACATAACGATTTATCCAGACACATATCAACGTTATTACGTGACCATC	AGTGTCATCTTTAAGTCACAACAACCCATTATTTAACTGATTTCTTACTAAATTTTGTACGTTACTAGGGCTGTGACTGATTACTTTCACTGCAAACTGAAACTACAACCGTCTGTATGAGGAACAAGTTACATTTTTTCACTGCTTAAAACAACGGCAGCCGAAGGGACATATTTGCACCAGTTCCATCCAGTCCAAACACACACATAACGATTTTTCCAGACACATTTCAACGTTATTACGTGACCATC
R. flavipes	A22	9	20	RfA22b_1	MK295374	MK295502	MK295244	-84.2509	34.6831	5	5	5	C	1,3	ACATCACTTAGAATACTAATTCGAACAGAACTAGGGCAACCCGGATCTCTAATTGGAGATGACCAGATCTACAACGTTATCGTTACTGCTCATGCATTCGTCATAATTTTCTTTATAGTCATACCAATCATGATTGGTGGATTCGGAAACTGATTAGTACCACTTATATTAGGAGCCCCAGACATGGCATTCCCACGAATAAACAACATAAGATTTTGATTACTCCCACCGTCATTAACATTACTACTTACTAGCAGAACAGTAGAAAGTGGAGCAGGGACAGGATGAACAGTCTACCCCCCTCTTGCGAGAGGTATTGCCCATGCAGGAGCATCCGTAGACTTAGCCATCTTCTCCTTGCATCTAGCAGGTGTTTCATCAATTTTGGGAGCAGTAAAT…	TTCTTCCACGATCATACATTAATAATTATATTAATAATCATCACAACCGTTATATACATGATAACCACCCTACTTTGAAATAAACATACTAGACGATTCATACTAGAAGGACAACTAATTGAAACTACATGAACAATTGCACCAGCAATTATCTTAGTATTCATTGCAATACCATCCTTACGACTTCTATATCTAATAGACGAAATCCACAACCCAACAATAACCCTAAAAGCAGTGGGACATCAATGATACTGAAGATATGAATATTCAGACTTCACAAAATTAGAATTCGACTCTTACATAATCCCACAAGAGGAAAATCAAGCAAGAACTTTCCGACTACTAGACACAGATAATCGAATTGTACTACCCATAAATTCACCAATCCGACTAGTAGTG…	ACATCACTTAGAATACTAATTCGAACAGAACTAGGGCAACCCGGATCTCTAATTGGAGATGACCAGATCTACAACGTTATCGTTACTGCTCATGCATTCGTCATAATTTTCTTTATAGTCATACCAATCATGATTGGTGGATTCGGAAACTGATTAGTACCACTTATATTAGGAGCCCCAGACATGGCATTCCCACGAATAAACAACATAAGATTTTGATTACTCCCACCGTCATTAACATTACTACTTACTAGCAGAACAGTAGAAAGTGGAGCAGGGACAGGATGAACAGTCTACCCCCCTCTTGCGAGAGGTATTGCCCATGCAGGAGCATCCGTAGACTTAGCCATCTTCTCCTTGCATCTAGCAGGTGTTTCATCAATTTTGGGAGCAGTAAAT…	AGTGTCATCTTTAAGTCACAACAACCCATTATTTAACTGATTTCTTACTAAATTTTGTACGTTACTAGGGCTGTGACTGATTACTTTCACTGCAAACTGAAACTACAACCGTCTGTATGAGGAACAAGTTACATTTTTTCACTGCTTAAAACAACGGCAGCCGAAGGGACATATTTGCACCAGTTCCATCCAGTCCAAACACACACATAACGATTTATCCAGACACATATCAACGTTATTACGTGACCATC	AGTGTCATCTTTAAGTCACAACAACCCATTATTTAACTGATTTCTTACTAAATTTTGTACGTTACTAGGGCTGTGACTGATTACTTTCACTGCAAACTGAAACTACAACCGTCTGTATGAGGAACAAGTTACATTTTTTCACTGCTTAAAACAACGGCAGCCGACGGGACATATTTGCACCAGTTCCATCCAGTCCAAACACACACATAACGATTTTTCCAGACACATTTCAACGTTATTACGTGACCATC
R. flavipes	A22	9	21	RfA22b_2	MK295375	MK295503	MK295245	-84.2509	34.6831	5	5	5	C	1,3	ACATCACTTAGAATACTAATTCGAACAGAACTAGGGCAACCCGGATCTCTAATTGGAGATGACCAGATCTACAACGTTATCGTTACTGCTCATGCATTCGTCATAATTTTCTTTATAGTCATACCAATCATGATTGGTGGATTCGGAAACTGATTAGTACCACTTATATTAGGAGCCCCAGACATGGCATTCCCACGAATAAACAACATAAGATTTTGATTACTCCCACCGTCATTAACATTACTACTTACTAGCAGAACAGTAGAAAGTGGAGCAGGGACAGGATGAACAGTCTACCCCCCTCTTGCGAGAGGTATTGCCCATGCAGGAGCATCCGTAGACTTAGCCATCTTCTCCTTGCATCTAGCAGGTGTTTCATCAATTTTGGGAGCAGTAAAT…	TTCTTCCACGATCATACATTAATAATTATATTAATAATCATCACAACCGTTATATACATGATAACCACCCTACTTTGAAATAAACATACTAGACGATTCATACTAGAAGGACAACTAATTGAAACTACATGAACAATTGCACCAGCAATTATCTTAGTATTCATTGCAATACCATCCTTACGACTTCTATATCTAATAGACGAAATCCACAACCCAACAATAACCCTAAAAGCAGTGGGACATCAATGATACTGAAGATATGAATATTCAGACTTCACAAAATTAGAATTCGACTCTTACATAATCCCACAAGAGGAAAATCAAGCAAGAACTTTCCGACTACTAGACACAGATAATCGAATTGTACTACCCATAAATTCACCAATCCGACTAGTAGTG…	ACATCACTTAGAATACTAATTCGAACAGAACTAGGGCAACCCGGATCTCTAATTGGAGATGACCAGATCTACAACGTTATCGTTACTGCTCATGCATTCGTCATAATTTTCTTTATAGTCATACCAATCATGATTGGTGGATTCGGAAACTGATTAGTACCACTTATATTAGGAGCCCCAGACATGGCATTCCCACGAATAAACAACATAAGATTTTGATTACTCCCACCGTCATTAACATTACTACTTACTAGCAGAACAGTAGAAAGTGGAGCAGGGACAGGATGAACAGTCTACCCCCCTCTTGCGAGAGGTATTGCCCATGCAGGAGCATCCGTAGACTTAGCCATCTTCTCCTTGCATCTAGCAGGTGTTTCATCAATTTTGGGAGCAGTAAAT…	AGTGTCATCTTTAAGTCACAACAACCCATTATTTAACTGATTTCTTACTAAATTTTGTACGTTACTAGGGCTGTGACTGATTACTTTCACTGCAAACTGAAACTACAACCGTCTGTATGAGGAACAAGTTACATTTTTTCACTGCTTAAAACAACGGCAGCCGAAGGGACATATTTGCACCAGTTCCATCCAGTCCAAACACACACATAACGATTTATCCAGACACATATCAACGTTATTACGTGACCATC	AGTGTCATCTTTAAGTCACAACAACCCATTATTTAACTGATTTCTTACTAAATTTTGTACGTTACTAGGGCTGTGACTGATTACTTTCACTGCAAACTGAAACTACAACCGTCTGTATGAGGAACAAGTTACATTTTTTCACTGCTTAAAACAACGGCAGCCGACGGGACATATTTGCACCAGTTCCATCCAGTCCAAACACACACATAACGATTTTTCCAGACACATTTCAACGTTATTACGTGACCATC
R. flavipes	A30	10	22	RfA30_1	MK295376	MK295504	MK295246	-83.5185	35.6568	1	1	1	C	1,3	ACATCACTTAGAATACTAATTCGAACAGAACTAGGGCAACCCGGATCTCTAATTGGAGATGACCAGATCTACAACGTTATCGTTACTGCTCATGCATTCGTCATAATTTTCTTTATAGTCATACCAATCATGATTGGTGGATTCGGAAACTGATTAGTACCACTTATATTAGGAGCCCCAGACATGGCATTCCCACGAATAAACAACATAAGATTTTGATTACTCCCACCGTCATTAACATTACTACTTACTAGCAGAACAGTAGAAAGTGGAGCAGGGACAGGATGAACAGTCTACCCCCCTCTTGCGAGAGGTATTGCCCATGCAGGAGCATCCGTAGACTTAGCCATCTTCTCCTTACATCTAGCAGGTGTTTCATCAATTTTGGGAGCAGTAAAT…	TTCTTCCACGATCATACATTAATAATTATATTAATAATCATCACAACCGTTATATACATGATAACCACCCTACTTTGAAATAAACATACTAGACGATTCATACTAGAAGGACAACTAATTGAAACTACATGAACAATTGCACCAGCAATTATCTTAGTATTCATTGCAATACCATCCTTACGACTTCTATATCTAATAGACGAAATTCACAACCCAACAATAACCCTAAAAGCAGTGGGACATCAATGATACTGAAGATATGAATATTCAGACTTCACAAAATTAGAATTCGACTCTTACATAATCCCACAAGAGGAAAATCAAGCAAGAACTTTCCGACTACTAGACACAGATAATCGAATTGTACTACCCATAAATTCACCAATCCGACTAGTAGTG…	ACATCACTTAGAATACTAATTCGAACAGAACTAGGGCAACCCGGATCTCTAATTGGAGATGACCAGATCTACAACGTTATCGTTACTGCTCATGCATTCGTCATAATTTTCTTTATAGTCATACCAATCATGATTGGTGGATTCGGAAACTGATTAGTACCACTTATATTAGGAGCCCCAGACATGGCATTCCCACGAATAAACAACATAAGATTTTGATTACTCCCACCGTCATTAACATTACTACTTACTAGCAGAACAGTAGAAAGTGGAGCAGGGACAGGATGAACAGTCTACCCCCCTCTTGCGAGAGGTATTGCCCATGCAGGAGCATCCGTAGACTTAGCCATCTTCTCCTTACATCTAGCAGGTGTTTCATCAATTTTGGGAGCAGTAAAT…	AGTGTCATCTTTAAGTCACAACAACCCATTATTTAACTGATTTCTTACTAAATTTTGTACGTTACTAGGGCTGTGACTGATTACTTTCACTGCAAACTGAAACTACAACCGTCTGTATGAGGAACAAGTTACATTTTTTCACTGCTTAAAACAACGGCAGCCGAAGGGACATATTTGCACCAGTTCCATCCAGTCCAAACACACACATAACGATTTATCCAGACACATATCAACGTTATTACGTGACCATC	AGTGTCATCTTTAAGTCACAACAACCCATTATTTAACTGATTTCTTACTAAATTTTGTACGTTACTAGGGCTGTGACTGATTACTTTCACTGCAAACTGAAACTACAACCGTCTGTATGAGGAACAAGTTACATTTTTTCACTGCTTAAAACAACGGCAGCCGACGGGACATATTTGCACCAGTTCCATCCAGTCCAAACACACACATAACGATTTTTCCAGACACATTTCAACGTTATTACGTGACCATC
R. flavipes	A30	10	23	RfA30_2	MK295377	MK295505	MK295247	-83.5185	35.6568	1	1	1	C	1,3	ACATCACTTAGAATACTAATTCGAACAGAACTAGGGCAACCCGGATCTCTAATTGGAGATGACCAGATCTACAACGTTATCGTTACTGCTCATGCATTCGTCATAATTTTCTTTATAGTCATACCAATCATGATTGGTGGATTCGGAAACTGATTAGTACCACTTATATTAGGAGCCCCAGACATGGCATTCCCACGAATAAACAACATAAGATTTTGATTACTCCCACCGTCATTAACATTACTACTTACTAGCAGAACAGTAGAAAGTGGAGCAGGGACAGGATGAACAGTCTACCCCCCTCTTGCGAGAGGTATTGCCCATGCAGGAGCATCCGTAGACTTAGCCATCTTCTCCTTACATCTAGCAGGTGTTTCATCAATTTTGGGAGCAGTAAAT…	TTCTTCCACGATCATACATTAATAATTATATTAATAATCATCACAACCGTTATATACATGATAACCACCCTACTTTGAAATAAACATACTAGACGATTCATACTAGAAGGACAACTAATTGAAACTACATGAACAATTGCACCAGCAATTATCTTAGTATTCATTGCAATACCATCCTTACGACTTCTATATCTAATAGACGAAATTCACAACCCAACAATAACCCTAAAAGCAGTGGGACATCAATGATACTGAAGATATGAATATTCAGACTTCACAAAATTAGAATTCGACTCTTACATAATCCCACAAGAGGAAAATCAAGCAAGAACTTTCCGACTACTAGACACAGATAATCGAATTGTACTACCCATAAATTCACCAATCCGACTAGTAGTG…	ACATCACTTAGAATACTAATTCGAACAGAACTAGGGCAACCCGGATCTCTAATTGGAGATGACCAGATCTACAACGTTATCGTTACTGCTCATGCATTCGTCATAATTTTCTTTATAGTCATACCAATCATGATTGGTGGATTCGGAAACTGATTAGTACCACTTATATTAGGAGCCCCAGACATGGCATTCCCACGAATAAACAACATAAGATTTTGATTACTCCCACCGTCATTAACATTACTACTTACTAGCAGAACAGTAGAAAGTGGAGCAGGGACAGGATGAACAGTCTACCCCCCTCTTGCGAGAGGTATTGCCCATGCAGGAGCATCCGTAGACTTAGCCATCTTCTCCTTACATCTAGCAGGTGTTTCATCAATTTTGGGAGCAGTAAAT…	AGTGTCATCTTTAAGTCACAACAACCCATTATTTAACTGATTTCTTACTAAATTTTGTACGTTACTAGGGCTGTGACTGATTACTTTCACTGCAAACTGAAACTACAACCGTCTGTATGAGGAACAAGTTACATTTTTTCACTGCTTAAAACAACGGCAGCCGAAGGGACATATTTGCACCAGTTCCATCCAGTCCAAACACACACATAACGATTTATCCAGACACATATCAACGTTATTACGTGACCATC	AGTGTCATCTTTAAGTCACAACAACCCATTATTTAACTGATTTCTTACTAAATTTTGTACGTTACTAGGGCTGTGACTGATTACTTTCACTGCAAACTGAAACTACAACCGTCTGTATGAGGAACAAGTTACATTTTTTCACTGCTTAAAACAACGGCAGCCGACGGGACATATTTGCACCAGTTCCATCCAGTCCAAACACACACATAACGATTTTTCCAGACACATTTCAACGTTATTACGTGACCATC
R. flavipes	A30	10	24	RfA30_3	MK295378	MK295506	MK295248	-83.5185	35.6568	1	1	1	C	1,3	ACATCACTTAGAATACTAATTCGAACAGAACTAGGGCAACCCGGATCTCTAATTGGAGATGACCAGATCTACAACGTTATCGTTACTGCTCATGCATTCGTCATAATTTTCTTTATAGTCATACCAATCATGATTGGTGGATTCGGAAACTGATTAGTACCACTTATATTAGGAGCCCCAGACATGGCATTCCCACGAATAAACAACATAAGATTTTGATTACTCCCACCGTCATTAACATTACTACTTACTAGCAGAACAGTAGAAAGTGGAGCAGGGACAGGATGAACAGTCTACCCCCCTCTTGCGAGAGGTATTGCCCATGCAGGAGCATCCGTAGACTTAGCCATCTTCTCCTTACATCTAGCAGGTGTTTCATCAATTTTGGGAGCAGTAAAT…	TTCTTCCACGATCATACATTAATAATTATATTAATAATCATCACAACCGTTATATACATGATAACCACCCTACTTTGAAATAAACATACTAGACGATTCATACTAGAAGGACAACTAATTGAAACTACATGAACAATTGCACCAGCAATTATCTTAGTATTCATTGCAATACCATCCTTACGACTTCTATATCTAATAGACGAAATTCACAACCCAACAATAACCCTAAAAGCAGTGGGACATCAATGATACTGAAGATATGAATATTCAGACTTCACAAAATTAGAATTCGACTCTTACATAATCCCACAAGAGGAAAATCAAGCAAGAACTTTCCGACTACTAGACACAGATAATCGAATTGTACTACCCATAAATTCACCAATCCGACTAGTAGTG…	ACATCACTTAGAATACTAATTCGAACAGAACTAGGGCAACCCGGATCTCTAATTGGAGATGACCAGATCTACAACGTTATCGTTACTGCTCATGCATTCGTCATAATTTTCTTTATAGTCATACCAATCATGATTGGTGGATTCGGAAACTGATTAGTACCACTTATATTAGGAGCCCCAGACATGGCATTCCCACGAATAAACAACATAAGATTTTGATTACTCCCACCGTCATTAACATTACTACTTACTAGCAGAACAGTAGAAAGTGGAGCAGGGACAGGATGAACAGTCTACCCCCCTCTTGCGAGAGGTATTGCCCATGCAGGAGCATCCGTAGACTTAGCCATCTTCTCCTTACATCTAGCAGGTGTTTCATCAATTTTGGGAGCAGTAAAT…	AGTGTCATCTTTAAGTCACAACAACCCATTATTTAACTGATTTCTTACTAAATTTTGTACGTTACTAGGGCTGTGACTGATTACTTTCACTGCAAACTGAAACTACAACCGTCTGTATGAGGAACAAGTTACATTTTTTCACTGCTTAAAACAACGGCAGCCGAAGGGACATATTTGCACCAGTTCCATCCAGTCCAAACACACACATAACGATTTATCCAGACACATATCAACGTTATTACGTGACCATC	AGTGTCATCTTTAAGTCACAACAACCCATTATTTAACTGATTTCTTACTAAATTTTGTACGTTACTAGGGCTGTGACTGATTACTTTCACTGCAAACTGAAACTACAACCGTCTGTATGAGGAACAAGTTACATTTTTTCACTGCTTAAAACAACGGCAGCCGACGGGACATATTTGCACCAGTTCCATCCAGTCCAAACACACACATAACGATTTTTCCAGACACATTTCAACGTTATTACGTGACCATC
R. flavipes	A31	11	25	RfA31b_1	MK295379	MK295507	MK295249	-83.3572	35.7023	6	6	7	C	3,3	ACATCACTTAGAATACTAATTCGAACAGAACTAGGGCAACCCGGATCTCTAATTGGAGATGACCAGATCTACAACGTTATCGTTACTGCTCATGCATTCGTCATAATTTTCTTTATAGTAATACCAATCATGATTGGTGGATTCGGAAACTGATTAGTACCACTTATATTAGGAGCCCCAGACATGGCATTCCCACGAATAAACAACATAAGATTTTGATTACTCCCACCGTCATTAACATTACTACTTACTAGCAGAACAGTAGAAAGTGGAGCAGGGACAGGATGAACAGTCTACCCCCCTCTTGCGAGAGGTATTGCCCATGCAGGAGCATCCGTAGACTTAGCCATCTTCTCCTTACATCTAGCAGGTGTTTCATCAATTTTGGGAGCAGTAAAT…	TTCTTCCACGATCATACATTAATAATTATATTAATAATCATCACAACCGTTATATACATGATAACCACCCTACTTTGAAATAAACATACTAGACGATTCATACTAGAAGGACAACTAATTGAAACTACATGAACAATTGCACCAGCAATTATCTTAGTATTCATTGCAATACCATCCTTACGACTTCTATATCTAATAGACGAAATCCACAACCCAACAATAACCCTAAAAGCAGTGGGACATCAATGATACTGAAGATATGAATATTCAGACTTCACAAAATTAGAATTTGACTCTTACATAATCCCACAAGAGGAAAATCAAGCAAGAACTTTCCGACTACTAGACACAGATAATCGAATTGTACTACCCATAAATTCACCAATCCGACTAGTAGTG…	ACATCACTTAGAATACTAATTCGAACAGAACTAGGGCAACCCGGATCTCTAATTGGAGATGACCAGATCTACAACGTTATCGTTACTGCTCATGCATTCGTCATAATTTTCTTTATAGTAATACCAATCATGATTGGTGGATTCGGAAACTGATTAGTACCACTTATATTAGGAGCCCCAGACATGGCATTCCCACGAATAAACAACATAAGATTTTGATTACTCCCACCGTCATTAACATTACTACTTACTAGCAGAACAGTAGAAAGTGGAGCAGGGACAGGATGAACAGTCTACCCCCCTCTTGCGAGAGGTATTGCCCATGCAGGAGCATCCGTAGACTTAGCCATCTTCTCCTTACATCTAGCAGGTGTTTCATCAATTTTGGGAGCAGTAAAT…	AGTGTCATCTTTAAGTCACAACAACCCATTATTTAACTGATTTCTTACTAAATTTTGTACGTTACTAGGGCTGTGACTGATTACTTTCACTGCAAACTGAAACTACAACCGTCTGTATGAGGAACAAGTTACATTTTTTCACTGCTTAAAACAACGGCAGCCGACGGGACATATTTGCACCAGTTCCATCCAGTCCAAACACACACATAACGATTTTTCCAGACACATTTCAACGTTATTACGTGACCATC	AGTGTCATCTTTAAGTCACAACAACCCATTATTTAACTGATTTCTTACTAAATTTTGTACGTTACTAGGGCTGTGACTGATTACTTTCACTGCAAACTGAAACTACAACCGTCTGTATGAGGAACAAGTTACATTTTTTCACTGCTTAAAACAACGGCAGCCGACGGGACATATTTGCACCAGTTCCATCCAGTCCAAACACACACATAACGATTTTTCCAGACACATTTCAACGTTATTACGTGACCATC
R. flavipes	A32	12	26	RfA32_1	MK295380	MK295508	MK295250	-83.3108	35.5212	7	5	8	C	1,3	ACATCACTTAGAATACTAATTCGAACAGAACTAGGGCAACCCGGATCTCTAATTGGAGATGACCAGATCTACAACGTTATCGTTACTGCTCATGCATTCGTCATAATTTTCTTTATAGTCATACCAATCATGATTGGTGGATTCGGAAACTGATTAGTACCACTTATATTAGGAGCCCCAGACATGGCATTCCCACGAATAAACAACATAAGATTTTGATTACTCCCACCGTCATTAACATTACTACTTACTAGCAGAACAGTAGAAAGTGGAGCAGGGACAGGATGAACAGTCTACCCCCCTCTTGCGAGAGGTATTGCCCATGCAGGAGCATCCGTAGACTTAGCCATCTTCTCCTTACATCTAGCAGGCGTTTCATCAATTTTGGGAGCAGTAAAT…	TTCTTCCACGATCATACATTAATAATTATATTAATAATCATCACAACCGTTATATACATGATAACCACCCTACTTTGAAATAAACATACTAGACGATTCATACTAGAAGGACAACTAATTGAAACTACATGAACAATTGCACCAGCAATTATCTTAGTATTCATTGCAATACCATCCTTACGACTTCTATATCTAATAGACGAAATCCACAACCCAACAATAACCCTAAAAGCAGTGGGACATCAATGATACTGAAGATATGAATATTCAGACTTCACAAAATTAGAATTCGACTCTTACATAATCCCACAAGAGGAAAATCAAGCAAGAACTTTCCGACTACTAGACACAGATAATCGAATTGTACTACCCATAAATTCACCAATCCGACTAGTAGTG…	ACATCACTTAGAATACTAATTCGAACAGAACTAGGGCAACCCGGATCTCTAATTGGAGATGACCAGATCTACAACGTTATCGTTACTGCTCATGCATTCGTCATAATTTTCTTTATAGTCATACCAATCATGATTGGTGGATTCGGAAACTGATTAGTACCACTTATATTAGGAGCCCCAGACATGGCATTCCCACGAATAAACAACATAAGATTTTGATTACTCCCACCGTCATTAACATTACTACTTACTAGCAGAACAGTAGAAAGTGGAGCAGGGACAGGATGAACAGTCTACCCCCCTCTTGCGAGAGGTATTGCCCATGCAGGAGCATCCGTAGACTTAGCCATCTTCTCCTTACATCTAGCAGGCGTTTCATCAATTTTGGGAGCAGTAAAT…	AGTGTCATCTTTAAGTCACAACAACCCATTATTTAACTGATTTCTTACTAAATTTTGTACGTTACTAGGGCTGTGACTGATTACTTTCACTGCAAACTGAAACTACAACCGTCTGTATGAGGAACAAGTTACATTTTTTCACTGCTTAAAACAACGGCAGCCGAAGGGACATATTTGCACCAGTTCCATCCAGTCCAAACACACACATAACGATTTATCCAGACACATATCAACGTTATTACGTGACCATC	AGTGTCATCTTTAAGTCACAACAACCCATTATTTAACTGATTTCTTACTAAATTTTGTACGTTACTAGGGCTGTGACTGATTACTTTCACTGCAAACTGAAACTACAACCGTCTGTATGAGGAACAAGTTACATTTTTTCACTGCTTAAAACAACGGCAGCCGACGGGACATATTTGCACCAGTTCCATCCAGTCCAAACACACACATAACGATTTTTCCAGACACATTTCAACGTTATTACGTGACCATC
R. flavipes	A32	12	27	RfA32_2	MK295381	MK295509	MK295251	-83.3108	35.5212	7	5	8	C	1,3	ACATCACTTAGAATACTAATTCGAACAGAACTAGGGCAACCCGGATCTCTAATTGGAGATGACCAGATCTACAACGTTATCGTTACTGCTCATGCATTCGTCATAATTTTCTTTATAGTCATACCAATCATGATTGGTGGATTCGGAAACTGATTAGTACCACTTATATTAGGAGCCCCAGACATGGCATTCCCACGAATAAACAACATAAGATTTTGATTACTCCCACCGTCATTAACATTACTACTTACTAGCAGAACAGTAGAAAGTGGAGCAGGGACAGGATGAACAGTCTACCCCCCTCTTGCGAGAGGTATTGCCCATGCAGGAGCATCCGTAGACTTAGCCATCTTCTCCTTACATCTAGCAGGCGTTTCATCAATTTTGGGAGCAGTAAAT…	TTCTTCCACGATCATACATTAATAATTATATTAATAATCATCACAACCGTTATATACATGATAACCACCCTACTTTGAAATAAACATACTAGACGATTCATACTAGAAGGACAACTAATTGAAACTACATGAACAATTGCACCAGCAATTATCTTAGTATTCATTGCAATACCATCCTTACGACTTCTATATCTAATAGACGAAATCCACAACCCAACAATAACCCTAAAAGCAGTGGGACATCAATGATACTGAAGATATGAATATTCAGACTTCACAAAATTAGAATTCGACTCTTACATAATCCCACAAGAGGAAAATCAAGCAAGAACTTTCCGACTACTAGACACAGATAATCGAATTGTACTACCCATAAATTCACCAATCCGACTAGTAGTG…	ACATCACTTAGAATACTAATTCGAACAGAACTAGGGCAACCCGGATCTCTAATTGGAGATGACCAGATCTACAACGTTATCGTTACTGCTCATGCATTCGTCATAATTTTCTTTATAGTCATACCAATCATGATTGGTGGATTCGGAAACTGATTAGTACCACTTATATTAGGAGCCCCAGACATGGCATTCCCACGAATAAACAACATAAGATTTTGATTACTCCCACCGTCATTAACATTACTACTTACTAGCAGAACAGTAGAAAGTGGAGCAGGGACAGGATGAACAGTCTACCCCCCTCTTGCGAGAGGTATTGCCCATGCAGGAGCATCCGTAGACTTAGCCATCTTCTCCTTACATCTAGCAGGCGTTTCATCAATTTTGGGAGCAGTAAAT…	AGTGTCATCTTTAAGTCACAACAACCCATTATTTAACTGATTTCTTACTAAATTTTGTACGTTACTAGGGCTGTGACTGATTACTTTCACTGCAAACTGAAACTACAACCGTCTGTATGAGGAACAAGTTACATTTTTTCACTGCTTAAAACAACGGCAGCCGAAGGGACATATTTGCACCAGTTCCATCCAGTCCAAACACACACATAACGATTTATCCAGACACATATCAACGTTATTACGTGACCATC	AGTGTCATCTTTAAGTCACAACAACCCATTATTTAACTGATTTCTTACTAAATTTTGTACGTTACTAGGGCTGTGACTGATTACTTTCACTGCAAACTGAAACTACAACCGTCTGTATGAGGAACAAGTTACATTTTTTCACTGCTTAAAACAACGGCAGCCGACGGGACATATTTGCACCAGTTCCATCCAGTCCAAACACACACATAACGATTTTTCCAGACACATTTCAACGTTATTACGTGACCATC
R. flavipes	A32	12	28	RfA32_3	x	x	MK295252	-83.3108	35.5212	x	x	x	x	1,3	x	x	x	AGTGTCATCTTTAAGTCACAACAACCCATTATTTAACTGATTTCTTACTAAATTTTGTACGTTACTAGGGCTGTGACTGATTACTTTCACTGCAAACTGAAACTACAACCGTCTGTATGAGGAACAAGTTACATTTTTTCACTGCTTAAAACAACGGCAGCCGAAGGGACATATTTGCACCAGTTCCATCCAGTCCAAACACACACATAACGATTTATCCAGACACATATCAACGTTATTACGTGACCATC	AGTGTCATCTTTAAGTCACAACAACCCATTATTTAACTGATTTCTTACTAAATTTTGTACGTTACTAGGGCTGTGACTGATTACTTTCACTGCAAACTGAAACTACAACCGTCTGTATGAGGAACAAGTTACATTTTTTCACTGCTTAAAACAACGGCAGCCGACGGGACATATTTGCACCAGTTCCATCCAGTCCAAACACACACATAACGATTTTTCCAGACACATTTCAACGTTATTACGTGACCATC
R. flavipes	A37	13	29	RfA37_1	MK295382	MK295510	MK295253	-83.2134	35.7714	1	5	6	C	2,2	ACATCACTTAGAATACTAATTCGAACAGAACTAGGGCAACCCGGATCTCTAATTGGAGATGACCAGATCTACAACGTTATCGTTACTGCTCATGCATTCGTCATAATTTTCTTTATAGTCATACCAATCATGATTGGTGGATTCGGAAACTGATTAGTACCACTTATATTAGGAGCCCCAGACATGGCATTCCCACGAATAAACAACATAAGATTTTGATTACTCCCACCGTCATTAACATTACTACTTACTAGCAGAACAGTAGAAAGTGGAGCAGGGACAGGATGAACAGTCTACCCCCCTCTTGCGAGAGGTATTGCCCATGCAGGAGCATCCGTAGACTTAGCCATCTTCTCCTTACATCTAGCAGGTGTTTCATCAATTTTGGGAGCAGTAAAT…	TTCTTCCACGATCATACATTAATAATTATATTAATAATCATCACAACCGTTATATACATGATAACCACCCTACTTTGAAATAAACATACTAGACGATTCATACTAGAAGGACAACTAATTGAAACTACATGAACAATTGCACCAGCAATTATCTTAGTATTCATTGCAATACCATCCTTACGACTTCTATATCTAATAGACGAAATCCACAACCCAACAATAACCCTAAAAGCAGTGGGACATCAATGATACTGAAGATATGAATATTCAGACTTCACAAAATTAGAATTCGACTCTTACATAATCCCACAAGAGGAAAATCAAGCAAGAACTTTCCGACTACTAGACACAGATAATCGAATTGTACTACCCATAAATTCACCAATCCGACTAGTAGTG…	ACATCACTTAGAATACTAATTCGAACAGAACTAGGGCAACCCGGATCTCTAATTGGAGATGACCAGATCTACAACGTTATCGTTACTGCTCATGCATTCGTCATAATTTTCTTTATAGTCATACCAATCATGATTGGTGGATTCGGAAACTGATTAGTACCACTTATATTAGGAGCCCCAGACATGGCATTCCCACGAATAAACAACATAAGATTTTGATTACTCCCACCGTCATTAACATTACTACTTACTAGCAGAACAGTAGAAAGTGGAGCAGGGACAGGATGAACAGTCTACCCCCCTCTTGCGAGAGGTATTGCCCATGCAGGAGCATCCGTAGACTTAGCCATCTTCTCCTTACATCTAGCAGGTGTTTCATCAATTTTGGGAGCAGTAAAT…	AGTGTCATCTTTAAGTCACAACAACCCATTATTTAACTGATTTCTTACTAAATTTTGTACGTTACTAGGGCTGTGACTGATTACTTTCACTGCAAACTGAAACTACAACCGTCTGTATGAGGAACAAGTTACATTTTTTCACTGCTTAAAACAACGGCAGCCGAAGGGACATATTTGCACCAGTTCCATCCAGTCCAAACACACACATAACGATTTTTCCAGACACATTTCAACGTTATTACGTGACCATC	AGTGTCATCTTTAAGTCACAACAACCCATTATTTAACTGATTTCTTACTAAATTTTGTACGTTACTAGGGCTGTGACTGATTACTTTCACTGCAAACTGAAACTACAACCGTCTGTATGAGGAACAAGTTACATTTTTTCACTGCTTAAAACAACGGCAGCCGAAGGGACATATTTGCACCAGTTCCATCCAGTCCAAACACACACATAACGATTTTTCCAGACACATTTCAACGTTATTACGTGACCATC
R. flavipes	A37	13	30	RfA37_2	MK295383	MK295511	MK295254	-83.2134	35.7714	1	5	6	C	2,2	ACATCACTTAGAATACTAATTCGAACAGAACTAGGGCAACCCGGATCTCTAATTGGAGATGACCAGATCTACAACGTTATCGTTACTGCTCATGCATTCGTCATAATTTTCTTTATAGTCATACCAATCATGATTGGTGGATTCGGAAACTGATTAGTACCACTTATATTAGGAGCCCCAGACATGGCATTCCCACGAATAAACAACATAAGATTTTGATTACTCCCACCGTCATTAACATTACTACTTACTAGCAGAACAGTAGAAAGTGGAGCAGGGACAGGATGAACAGTCTACCCCCCTCTTGCGAGAGGTATTGCCCATGCAGGAGCATCCGTAGACTTAGCCATCTTCTCCTTACATCTAGCAGGTGTTTCATCAATTTTGGGAGCAGTAAAT…	TTCTTCCACGATCATACATTAATAATTATATTAATAATCATCACAACCGTTATATACATGATAACCACCCTACTTTGAAATAAACATACTAGACGATTCATACTAGAAGGACAACTAATTGAAACTACATGAACAATTGCACCAGCAATTATCTTAGTATTCATTGCAATACCATCCTTACGACTTCTATATCTAATAGACGAAATCCACAACCCAACAATAACCCTAAAAGCAGTGGGACATCAATGATACTGAAGATATGAATATTCAGACTTCACAAAATTAGAATTCGACTCTTACATAATCCCACAAGAGGAAAATCAAGCAAGAACTTTCCGACTACTAGACACAGATAATCGAATTGTACTACCCATAAATTCACCAATCCGACTAGTAGTG…	ACATCACTTAGAATACTAATTCGAACAGAACTAGGGCAACCCGGATCTCTAATTGGAGATGACCAGATCTACAACGTTATCGTTACTGCTCATGCATTCGTCATAATTTTCTTTATAGTCATACCAATCATGATTGGTGGATTCGGAAACTGATTAGTACCACTTATATTAGGAGCCCCAGACATGGCATTCCCACGAATAAACAACATAAGATTTTGATTACTCCCACCGTCATTAACATTACTACTTACTAGCAGAACAGTAGAAAGTGGAGCAGGGACAGGATGAACAGTCTACCCCCCTCTTGCGAGAGGTATTGCCCATGCAGGAGCATCCGTAGACTTAGCCATCTTCTCCTTACATCTAGCAGGTGTTTCATCAATTTTGGGAGCAGTAAAT…	AGTGTCATCTTTAAGTCACAACAACCCATTATTTAACTGATTTCTTACTAAATTTTGTACGTTACTAGGGCTGTGACTGATTACTTTCACTGCAAACTGAAACTACAACCGTCTGTATGAGGAACAAGTTACATTTTTTCACTGCTTAAAACAACGGCAGCCGAAGGGACATATTTGCACCAGTTCCATCCAGTCCAAACACACACATAACGATTTTTCCAGACACATTTCAACGTTATTACGTGACCATC	AGTGTCATCTTTAAGTCACAACAACCCATTATTTAACTGATTTCTTACTAAATTTTGTACGTTACTAGGGCTGTGACTGATTACTTTCACTGCAAACTGAAACTACAACCGTCTGTATGAGGAACAAGTTACATTTTTTCACTGCTTAAAACAACGGCAGCCGAAGGGACATATTTGCACCAGTTCCATCCAGTCCAAACACACACATAACGATTTTTCCAGACACATTTCAACGTTATTACGTGACCATC
R. flavipes	A37	13	31	RfA37_3	MK295384	MK295512	MK295255	-83.2134	35.7714	1	5	6	C	2,2	ACATCACTTAGAATACTAATTCGAACAGAACTAGGGCAACCCGGATCTCTAATTGGAGATGACCAGATCTACAACGTTATCGTTACTGCTCATGCATTCGTCATAATTTTCTTTATAGTCATACCAATCATGATTGGTGGATTCGGAAACTGATTAGTACCACTTATATTAGGAGCCCCAGACATGGCATTCCCACGAATAAACAACATAAGATTTTGATTACTCCCACCGTCATTAACATTACTACTTACTAGCAGAACAGTAGAAAGTGGAGCAGGGACAGGATGAACAGTCTACCCCCCTCTTGCGAGAGGTATTGCCCATGCAGGAGCATCCGTAGACTTAGCCATCTTCTCCTTACATCTAGCAGGTGTTTCATCAATTTTGGGAGCAGTAAAT…	TTCTTCCACGATCATACATTAATAATTATATTAATAATCATCACAACCGTTATATACATGATAACCACCCTACTTTGAAATAAACATACTAGACGATTCATACTAGAAGGACAACTAATTGAAACTACATGAACAATTGCACCAGCAATTATCTTAGTATTCATTGCAATACCATCCTTACGACTTCTATATCTAATAGACGAAATCCACAACCCAACAATAACCCTAAAAGCAGTGGGACATCAATGATACTGAAGATATGAATATTCAGACTTCACAAAATTAGAATTCGACTCTTACATAATCCCACAAGAGGAAAATCAAGCAAGAACTTTCCGACTACTAGACACAGATAATCGAATTGTACTACCCATAAATTCACCAATCCGACTAGTAGTG…	ACATCACTTAGAATACTAATTCGAACAGAACTAGGGCAACCCGGATCTCTAATTGGAGATGACCAGATCTACAACGTTATCGTTACTGCTCATGCATTCGTCATAATTTTCTTTATAGTCATACCAATCATGATTGGTGGATTCGGAAACTGATTAGTACCACTTATATTAGGAGCCCCAGACATGGCATTCCCACGAATAAACAACATAAGATTTTGATTACTCCCACCGTCATTAACATTACTACTTACTAGCAGAACAGTAGAAAGTGGAGCAGGGACAGGATGAACAGTCTACCCCCCTCTTGCGAGAGGTATTGCCCATGCAGGAGCATCCGTAGACTTAGCCATCTTCTCCTTACATCTAGCAGGTGTTTCATCAATTTTGGGAGCAGTAAAT…	AGTGTCATCTTTAAGTCACAACAACCCATTATTTAACTGATTTCTTACTAAATTTTGTACGTTACTAGGGCTGTGACTGATTACTTTCACTGCAAACTGAAACTACAACCGTCTGTATGAGGAACAAGTTACATTTTTTCACTGCTTAAAACAACGGCAGCCGAAGGGACATATTTGCACCAGTTCCATCCAGTCCAAACACACACATAACGATTTTTCCAGACACATTTCAACGTTATTACGTGACCATC	AGTGTCATCTTTAAGTCACAACAACCCATTATTTAACTGATTTCTTACTAAATTTTGTACGTTACTAGGGCTGTGACTGATTACTTTCACTGCAAACTGAAACTACAACCGTCTGTATGAGGAACAAGTTACATTTTTTCACTGCTTAAAACAACGGCAGCCGAAGGGACATATTTGCACCAGTTCCATCCAGTCCAAACACACACATAACGATTTTTCCAGACACATTTCAACGTTATTACGTGACCATC
R. flavipes	A40	14	32	RfA40_1	MK295385	MK295513	MK295256	-84.6914	34.7593	8	6	9	C	1,2	ACATCACTTAGAATACTAATTCGAACAGAACTAGGGCAACCCGGATCTCTAATTGGAGATGACCAGATCTACAACGTTATCGTTACTGCTCATGCATTCGTCATAATTTTCTTTATAGTCATACCAATCATGATTGGTGGATTCGGAAACTGATTAGTACCACTTATATTAGGAGCCCCAGACATGGCATTCCCACGAATAAACAACATAAGATTTTGATTACTCCCACCGTCATTAACATTACTACTTACTAGCAGAACAGTAGAAAGTGGAGCAGGGACAGGATGAACAGTCTACCCCCCTCTTGCGAGAGGTATTGCCCATGCAGGAGCATCCGTAGACTTAGCCATCTTCTCCTTACATCTAGCAGGTGTTTCATCAATTTTGGGAGCAGTAAAT…	TTCTTCCACGATCATACATTAATAATTATATTAATAATCATCACAACCGTTATATACATGATAACCACCCTACTTTGAAATAAACATACTAGACGATTCATACTAGAAGGACAACTAATTGAAACTACATGAACAATTGCACCAGCAATTATCTTAGTATTCATTGCAATACCATCCTTACGACTTCTATATCTAATAGACGAAATCCACAACCCAACAATAACCCTAAAAGCAGTGGGACATCAATGATACTGAAGATATGAATATTCAGACTTCACAAAATTAGAATTTGACTCTTACATAATCCCACAAGAGGAAAATCAAGCAAGAACTTTCCGACTACTAGACACAGATAATCGAATTGTACTACCCATAAATTCACCAATCCGACTAGTAGTG…	ACATCACTTAGAATACTAATTCGAACAGAACTAGGGCAACCCGGATCTCTAATTGGAGATGACCAGATCTACAACGTTATCGTTACTGCTCATGCATTCGTCATAATTTTCTTTATAGTCATACCAATCATGATTGGTGGATTCGGAAACTGATTAGTACCACTTATATTAGGAGCCCCAGACATGGCATTCCCACGAATAAACAACATAAGATTTTGATTACTCCCACCGTCATTAACATTACTACTTACTAGCAGAACAGTAGAAAGTGGAGCAGGGACAGGATGAACAGTCTACCCCCCTCTTGCGAGAGGTATTGCCCATGCAGGAGCATCCGTAGACTTAGCCATCTTCTCCTTACATCTAGCAGGTGTTTCATCAATTTTGGGAGCAGTAAAT…	AGTGTCATCTTTAAGTCACAACAACCCATTATTTAACTGATTTCTTACTAAATTTTGTACGTTACTAGGGCTGTGACTGATTACTTTCACTGCAAACTGAAACTACAACCGTCTGTATGAGGAACAAGTTACATTTTTTCACTGCTTAAAACAACGGCAGCCGAAGGGACATATTTGCACCAGTTCCATCCAGTCCAAACACACACATAACGATTTATCCAGACACATATCAACGTTATTACGTGACCATC	AGTGTCATCTTTAAGTCACAACAACCCATTATTTAACTGATTTCTTACTAAATTTTGTACGTTACTAGGGCTGTGACTGATTACTTTCACTGCAAACTGAAACTACAACCGTCTGTATGAGGAACAAGTTACATTTTTTCACTGCTTAAAACAACGGCAGCCGAAGGGACATATTTGCACCAGTTCCATCCAGTCCAAACACACACATAACGATTTTTCCAGACACATTTCAACGTTATTACGTGACCATC
R. flavipes	A40	14	33	RfA40_2	MK295386	MK295514	MK295257	-84.6914	34.7593	8	6	9	C	1,2	ACATCACTTAGAATACTAATTCGAACAGAACTAGGGCAACCCGGATCTCTAATTGGAGATGACCAGATCTACAACGTTATCGTTACTGCTCATGCATTCGTCATAATTTTCTTTATAGTCATACCAATCATGATTGGTGGATTCGGAAACTGATTAGTACCACTTATATTAGGAGCCCCAGACATGGCATTCCCACGAATAAACAACATAAGATTTTGATTACTCCCACCGTCATTAACATTACTACTTACTAGCAGAACAGTAGAAAGTGGAGCAGGGACAGGATGAACAGTCTACCCCCCTCTTGCGAGAGGTATTGCCCATGCAGGAGCATCCGTAGACTTAGCCATCTTCTCCTTACATCTAGCAGGTGTTTCATCAATTTTGGGAGCAGTAAAT…	TTCTTCCACGATCATACATTAATAATTATATTAATAATCATCACAACCGTTATATACATGATAACCACCCTACTTTGAAATAAACATACTAGACGATTCATACTAGAAGGACAACTAATTGAAACTACATGAACAATTGCACCAGCAATTATCTTAGTATTCATTGCAATACCATCCTTACGACTTCTATATCTAATAGACGAAATCCACAACCCAACAATAACCCTAAAAGCAGTGGGACATCAATGATACTGAAGATATGAATATTCAGACTTCACAAAATTAGAATTTGACTCTTACATAATCCCACAAGAGGAAAATCAAGCAAGAACTTTCCGACTACTAGACACAGATAATCGAATTGTACTACCCATAAATTCACCAATCCGACTAGTAGTG…	ACATCACTTAGAATACTAATTCGAACAGAACTAGGGCAACCCGGATCTCTAATTGGAGATGACCAGATCTACAACGTTATCGTTACTGCTCATGCATTCGTCATAATTTTCTTTATAGTCATACCAATCATGATTGGTGGATTCGGAAACTGATTAGTACCACTTATATTAGGAGCCCCAGACATGGCATTCCCACGAATAAACAACATAAGATTTTGATTACTCCCACCGTCATTAACATTACTACTTACTAGCAGAACAGTAGAAAGTGGAGCAGGGACAGGATGAACAGTCTACCCCCCTCTTGCGAGAGGTATTGCCCATGCAGGAGCATCCGTAGACTTAGCCATCTTCTCCTTACATCTAGCAGGTGTTTCATCAATTTTGGGAGCAGTAAAT…	AGTGTCATCTTTAAGTCACAACAACCCATTATTTAACTGATTTCTTACTAAATTTTGTACGTTACTAGGGCTGTGACTGATTACTTTCACTGCAAACTGAAACTACAACCGTCTGTATGAGGAACAAGTTACATTTTTTCACTGCTTAAAACAACGGCAGCCGAAGGGACATATTTGCACCAGTTCCATCCAGTCCAAACACACACATAACGATTTATCCAGACACATATCAACGTTATTACGTGACCATC	AGTGTCATCTTTAAGTCACAACAACCCATTATTTAACTGATTTCTTACTAAATTTTGTACGTTACTAGGGCTGTGACTGATTACTTTCACTGCAAACTGAAACTACAACCGTCTGTATGAGGAACAAGTTACATTTTTTCACTGCTTAAAACAACGGCAGCCGAAGGGACATATTTGCACCAGTTCCATCCAGTCCAAACACACACATAACGATTTTTCCAGACACATTTCAACGTTATTACGTGACCATC
R. flavipes	A40	14	34	RfA40_3	MK295387	MK295515	MK295258	-84.6914	34.7593	8	6	9	C	1,2	ACATCACTTAGAATACTAATTCGAACAGAACTAGGGCAACCCGGATCTCTAATTGGAGATGACCAGATCTACAACGTTATCGTTACTGCTCATGCATTCGTCATAATTTTCTTTATAGTCATACCAATCATGATTGGTGGATTCGGAAACTGATTAGTACCACTTATATTAGGAGCCCCAGACATGGCATTCCCACGAATAAACAACATAAGATTTTGATTACTCCCACCGTCATTAACATTACTACTTACTAGCAGAACAGTAGAAAGTGGAGCAGGGACAGGATGAACAGTCTACCCCCCTCTTGCGAGAGGTATTGCCCATGCAGGAGCATCCGTAGACTTAGCCATCTTCTCCTTACATCTAGCAGGTGTTTCATCAATTTTGGGAGCAGTAAAT…	TTCTTCCACGATCATACATTAATAATTATATTAATAATCATCACAACCGTTATATACATGATAACCACCCTACTTTGAAATAAACATACTAGACGATTCATACTAGAAGGACAACTAATTGAAACTACATGAACAATTGCACCAGCAATTATCTTAGTATTCATTGCAATACCATCCTTACGACTTCTATATCTAATAGACGAAATCCACAACCCAACAATAACCCTAAAAGCAGTGGGACATCAATGATACTGAAGATATGAATATTCAGACTTCACAAAATTAGAATTTGACTCTTACATAATCCCACAAGAGGAAAATCAAGCAAGAACTTTCCGACTACTAGACACAGATAATCGAATTGTACTACCCATAAATTCACCAATCCGACTAGTAGTG…	ACATCACTTAGAATACTAATTCGAACAGAACTAGGGCAACCCGGATCTCTAATTGGAGATGACCAGATCTACAACGTTATCGTTACTGCTCATGCATTCGTCATAATTTTCTTTATAGTCATACCAATCATGATTGGTGGATTCGGAAACTGATTAGTACCACTTATATTAGGAGCCCCAGACATGGCATTCCCACGAATAAACAACATAAGATTTTGATTACTCCCACCGTCATTAACATTACTACTTACTAGCAGAACAGTAGAAAGTGGAGCAGGGACAGGATGAACAGTCTACCCCCCTCTTGCGAGAGGTATTGCCCATGCAGGAGCATCCGTAGACTTAGCCATCTTCTCCTTACATCTAGCAGGTGTTTCATCAATTTTGGGAGCAGTAAAT…	AGTGTCATCTTTAAGTCACAACAACCCATTATTTAACTGATTTCTTACTAAATTTTGTACGTTACTAGGGCTGTGACTGATTACTTTCACTGCAAACTGAAACTACAACCGTCTGTATGAGGAACAAGTTACATTTTTTCACTGCTTAAAACAACGGCAGCCGAAGGGACATATTTGCACCAGTTCCATCCAGTCCAAACACACACATAACGATTTATCCAGACACATATCAACGTTATTACGTGACCATC	AGTGTCATCTTTAAGTCACAACAACCCATTATTTAACTGATTTCTTACTAAATTTTGTACGTTACTAGGGCTGTGACTGATTACTTTCACTGCAAACTGAAACTACAACCGTCTGTATGAGGAACAAGTTACATTTTTTCACTGCTTAAAACAACGGCAGCCGAAGGGACATATTTGCACCAGTTCCATCCAGTCCAAACACACACATAACGATTTTTCCAGACACATTTCAACGTTATTACGTGACCATC
R. flavipes	A41	15	35	RfA41b_1	MK295388	MK295516	MK295259	-85.4976	33.9186	9	1	10	C	1,3	ACATCACTTAGAATACTAATTCGAACAGAACTAGGACAACCCGGATCTCTAATTGGAGATGACCAGATCTACAACGTTATCGTTACTGCTCATGCATTCGTCATAATTTTCTTTATAGTCATACCAATCATGATTGGTGGATTCGGAAACTGATTAGTACCACTTATATTAGGAGCCCCAGACATGGCATTCCCACGAATAAACAACATAAGATTTTGATTACTCCCACCGTCATTAACATTACTACTTACTAGCAGAACAGTAGAAAGTGGAGCAGGGACAGGATGAACAGTCTACCCCCCTCTTGCGAGAGGTATTGCCCATGCAGGAGCATCCGTAGACTTAGCCATCTTCTCCTTACATCTAGCAGGTGTTTCATCAATTTTGGGAGCAGTAAAT…	TTCTTCCACGATCATACATTAATAATTATATTAATAATCATCACAACCGTTATATACATGATAACCACCCTACTTTGAAATAAACATACTAGACGATTCATACTAGAAGGACAACTAATTGAAACTACATGAACAATTGCACCAGCAATTATCTTAGTATTCATTGCAATACCATCCTTACGACTTCTATATCTAATAGACGAAATTCACAACCCAACAATAACCCTAAAAGCAGTGGGACATCAATGATACTGAAGATATGAATATTCAGACTTCACAAAATTAGAATTCGACTCTTACATAATCCCACAAGAGGAAAATCAAGCAAGAACTTTCCGACTACTAGACACAGATAATCGAATTGTACTACCCATAAATTCACCAATCCGACTAGTAGTG…	ACATCACTTAGAATACTAATTCGAACAGAACTAGGACAACCCGGATCTCTAATTGGAGATGACCAGATCTACAACGTTATCGTTACTGCTCATGCATTCGTCATAATTTTCTTTATAGTCATACCAATCATGATTGGTGGATTCGGAAACTGATTAGTACCACTTATATTAGGAGCCCCAGACATGGCATTCCCACGAATAAACAACATAAGATTTTGATTACTCCCACCGTCATTAACATTACTACTTACTAGCAGAACAGTAGAAAGTGGAGCAGGGACAGGATGAACAGTCTACCCCCCTCTTGCGAGAGGTATTGCCCATGCAGGAGCATCCGTAGACTTAGCCATCTTCTCCTTACATCTAGCAGGTGTTTCATCAATTTTGGGAGCAGTAAAT…	AGTGTCATCTTTAAGTCACAACAACCCATTATTTAACTGATTTCTTACTAAATTTTGTACGTTACTAGGGCTGTGACTGATTACTTTCACTGCAAACTGAAACTACAACCGTCTGTATGAGGAACAAGTTACATTTTTTCACTGCTTAAAACAACGGCAGCCGAAGGGACATATTTGCACCAGTTCCATCCAGTCCAAACACACACATAACGATTTATCCAGACACATATCAACGTTATTACGTGACCATC	AGTGTCATCTTTAAGTCACAACAACCCATTATTTAACTGATTTCTTACTAAATTTTGTACGTTACTAGGGCTGTGACTGATTACTTTCACTGCAAACTGAAACTACAACCGTCTGTATGAGGAACAAGTTACATTTTTTCACTGCTTAAAACAACGGCAGCCGACGGGACATATTTGCACCAGTTCCATCCAGTCCAAACACACACATAACGATTTTTCCAGACACATTTCAACGTTATTACGTGACCATC
R. flavipes	A41	15	36	RfA41b_2	MK295389	MK295517	MK295260	-85.4976	33.9186	9	1	10	C	1,3	ACATCACTTAGAATACTAATTCGAACAGAACTAGGACAACCCGGATCTCTAATTGGAGATGACCAGATCTACAACGTTATCGTTACTGCTCATGCATTCGTCATAATTTTCTTTATAGTCATACCAATCATGATTGGTGGATTCGGAAACTGATTAGTACCACTTATATTAGGAGCCCCAGACATGGCATTCCCACGAATAAACAACATAAGATTTTGATTACTCCCACCGTCATTAACATTACTACTTACTAGCAGAACAGTAGAAAGTGGAGCAGGGACAGGATGAACAGTCTACCCCCCTCTTGCGAGAGGTATTGCCCATGCAGGAGCATCCGTAGACTTAGCCATCTTCTCCTTACATCTAGCAGGTGTTTCATCAATTTTGGGAGCAGTAAAT…	TTCTTCCACGATCATACATTAATAATTATATTAATAATCATCACAACCGTTATATACATGATAACCACCCTACTTTGAAATAAACATACTAGACGATTCATACTAGAAGGACAACTAATTGAAACTACATGAACAATTGCACCAGCAATTATCTTAGTATTCATTGCAATACCATCCTTACGACTTCTATATCTAATAGACGAAATTCACAACCCAACAATAACCCTAAAAGCAGTGGGACATCAATGATACTGAAGATATGAATATTCAGACTTCACAAAATTAGAATTCGACTCTTACATAATCCCACAAGAGGAAAATCAAGCAAGAACTTTCCGACTACTAGACACAGATAATCGAATTGTACTACCCATAAATTCACCAATCCGACTAGTAGTG…	ACATCACTTAGAATACTAATTCGAACAGAACTAGGACAACCCGGATCTCTAATTGGAGATGACCAGATCTACAACGTTATCGTTACTGCTCATGCATTCGTCATAATTTTCTTTATAGTCATACCAATCATGATTGGTGGATTCGGAAACTGATTAGTACCACTTATATTAGGAGCCCCAGACATGGCATTCCCACGAATAAACAACATAAGATTTTGATTACTCCCACCGTCATTAACATTACTACTTACTAGCAGAACAGTAGAAAGTGGAGCAGGGACAGGATGAACAGTCTACCCCCCTCTTGCGAGAGGTATTGCCCATGCAGGAGCATCCGTAGACTTAGCCATCTTCTCCTTACATCTAGCAGGTGTTTCATCAATTTTGGGAGCAGTAAAT…	AGTGTCATCTTTAAGTCACAACAACCCATTATTTAACTGATTTCTTACTAAATTTTGTACGTTACTAGGGCTGTGACTGATTACTTTCACTGCAAACTGAAACTACAACCGTCTGTATGAGGAACAAGTTACATTTTTTCACTGCTTAAAACAACGGCAGCCGAAGGGACATATTTGCACCAGTTCCATCCAGTCCAAACACACACATAACGATTTATCCAGACACATATCAACGTTATTACGTGACCATC	AGTGTCATCTTTAAGTCACAACAACCCATTATTTAACTGATTTCTTACTAAATTTTGTACGTTACTAGGGCTGTGACTGATTACTTTCACTGCAAACTGAAACTACAACCGTCTGTATGAGGAACAAGTTACATTTTTTCACTGCTTAAAACAACGGCAGCCGACGGGACATATTTGCACCAGTTCCATCCAGTCCAAACACACACATAACGATTTTTCCAGACACATTTCAACGTTATTACGTGACCATC
R. flavipes	A41	15	37	RfA41b_3	MK295390	MK295518	MK295261	-85.4976	33.9186	10	1	11	N	1,3	ACATCACTTAGAATATTAATTCGAACAGAACTAGGGCAACCCGGATCTCTAATTGGAGATGACCAGATCTACAACGTTATCGTTACTGCTCATGCATTCGTCATAATTTTCTTTATAGTCATACCAATCATGATTGGTGGATTCGGAAACTGGCTAGTACCACTTATATTAGGAGCCCCAGACATGGCATTCCCACGAATAAACAACATAAGATTTTGATTACTCCCACCGTCATTAACATTACTACTTACTAGCAGAACAGTAGAAAGTGGAGCAGGGACAGGATGAACAGTTTACCCCCCTCTTGCGAGAGGTATTGCCCATGCAGGAGCATCCGTAGACTTAGCCATCTTCTCTTTACATCTAGCAGGTGTTTCATCAATTTTGGGAGCAGTAAAT…	TTCTTCCACGATCATACATTAATAATTATATTAATAATCATCACAACCGTTATATACATGATAACCACCCTACTTTGAAATAAACATACTAGACGATTCATACTAGAAGGACAACTAATTGAAACTACATGAACAATTGCACCAGCAATTATCTTAGTATTCATTGCAATACCATCCTTACGACTTCTATATCTAATAGACGAAATTCACAACCCAACAATAACCCTAAAAGCAGTGGGACATCAATGATACTGAAGATATGAATATTCAGACTTCACAAAATTAGAATTCGACTCTTACATAATCCCACAAGAGGAAAATCAAGCAAGAACTTTCCGACTACTAGACACAGATAATCGAATTGTACTACCCATAAATTCACCAATCCGACTAGTAGTG…	ACATCACTTAGAATATTAATTCGAACAGAACTAGGGCAACCCGGATCTCTAATTGGAGATGACCAGATCTACAACGTTATCGTTACTGCTCATGCATTCGTCATAATTTTCTTTATAGTCATACCAATCATGATTGGTGGATTCGGAAACTGGCTAGTACCACTTATATTAGGAGCCCCAGACATGGCATTCCCACGAATAAACAACATAAGATTTTGATTACTCCCACCGTCATTAACATTACTACTTACTAGCAGAACAGTAGAAAGTGGAGCAGGGACAGGATGAACAGTTTACCCCCCTCTTGCGAGAGGTATTGCCCATGCAGGAGCATCCGTAGACTTAGCCATCTTCTCTTTACATCTAGCAGGTGTTTCATCAATTTTGGGAGCAGTAAAT…	AGTGTCATCTTTAAGTCACAACAACCCATTATTTAACTGATTTCTTACTAAATTTTGTACGTTACTAGGGCTGTGACTGATTACTTTCACTGCAAACTGAAACTACAACCGTCTGTATGAGGAACAAGTTACATTTTTTCACTGCTTAAAACAACGGCAGCCGAAGGGACATATTTGCACCAGTTCCATCCAGTCCAAACACACACATAACGATTTATCCAGACACATATCAACGTTATTACGTGACCATC	AGTGTCATCTTTAAGTCACAACAACCCATTATTTAACTGATTTCTTACTAAATTTTGTACGTTACTAGGGCTGTGACTGATTACTTTCACTGCAAACTGAAACTACAACCGTCTGTATGAGGAACAAGTTACATTTTTTCACTGCTTAAAACAACGGCAGCCGACGGGACATATTTGCACCAGTTCCATCCAGTCCAAACACACACATAACGATTTTTCCAGACACATTTCAACGTTATTACGTGACCATC
R. flavipes	A52	16	38	RfA52b_1	MK295391	MK295519	x	-80.5451	37.3476	11	7	12	N	x	ACATCACTTAGTATACTAATTCGAACAGAACTAGGGCAACCCGGATCCCTAATTGGAGATGACCAGATCTACAACGTTATCGTTACTGCTCATGCATTCGTCATAATTTTCTTTATGGTCATACCAATCATGATTGGTGGATTTGGAAACTGACTAGTACCACTTATATTAGGAGCCCCAGACATGGCATTCCCACGAATAAACAACATAAGATTTTGATTACTCCCACCATCATTAACATTACTACTTACTAGCAGAACAGTAGAAAGTGGAGCAGGGACAGGATGAACAGTTTACCCCCCTCTTGCGAGAGGTATTGCCCATGCAGGAGCATCCGTAGACTTAGCCATCTTCTCCTTACATCTAGCAGGTGTTTCATCAATTTTGGGAGCAGTAAAT…	TTCTTCCACGATCATACATTAATAATTATATTAATAATCATCACAACCGTTATATACATAATAACCACCCTACTTTGAAATAAACATACTAGACGATTCATACTAGAAGGACAACTAATTGAAACTACATGAACAATTGCACCAGCAATTATCTTAGTATTCATTGCAATACCATCCTTACGACTCCTATATCTAATAGACGAAATCCACAACCCAACAATAACCCTAAAAGCAGTAGGACATCAATGATACTGAAGATATGAATATTCAGACTTCACAAAATTAGAATTCGACTCTTACATAATCCCACAAGAGGAAAATCAAGCAAGAACTTTCCGACTACTAGACACAGATAATCGAATTGTACTACCCATAAATTCACCAATCCGACTAGTAGTG…	ACATCACTTAGTATACTAATTCGAACAGAACTAGGGCAACCCGGATCCCTAATTGGAGATGACCAGATCTACAACGTTATCGTTACTGCTCATGCATTCGTCATAATTTTCTTTATGGTCATACCAATCATGATTGGTGGATTTGGAAACTGACTAGTACCACTTATATTAGGAGCCCCAGACATGGCATTCCCACGAATAAACAACATAAGATTTTGATTACTCCCACCATCATTAACATTACTACTTACTAGCAGAACAGTAGAAAGTGGAGCAGGGACAGGATGAACAGTTTACCCCCCTCTTGCGAGAGGTATTGCCCATGCAGGAGCATCCGTAGACTTAGCCATCTTCTCCTTACATCTAGCAGGTGTTTCATCAATTTTGGGAGCAGTAAAT…	x	x
R. flavipes	A56	17	39	RfA56_1	MK295392	MK295520	x	-78.7837	38.129	12	8	13	N	x	ACATCACTTAGAATACTAATTCGAACAGAACTAGGGCAACCCGGATCTCTAATTGGAGATGACCAGATCTACAACGTTATCGTTACTGCTCATGCATTCGTCATAATTTTCTTTATAGTCATACCAATCATGATTGGTGGATTCGGAAACTGGCTAGTACCACTTATATTAGGAGCCCCAGACATGGCATTCCCACGAATAAACAACATAAGATTTTGATTACTCCCACCGTCATTAACATTACTACTTACTAGCAGAACAGTAGAAAGTGGAGCAGGGACAGGATGAACAGTTTACCCCCCTCTTGCGAGAGGTATTGCCCATGCAGGAGCATCCGTAGACTTAGCCATCTTCTCTTTACATCTAGCAGGTGTTTCATCAATTTTGGGAGCAGTAAAT…	TTCTTCCACGATCATACATTAATAATTATATTAATAATCATCACAACCGTTATATACATGATAACCACCCTACTTTGAAATAAACATACTAGACGATTCATACTAGAAGGACAACTAATTGAAACTACATGAACAATTGCACCAGCAATTATCTTAGTATTCATTGCAATACCATCCTTACGACTTCTATATCTAATAGACGAAATCCACAACCCAACAATAACCCTAAAAGCAGTAGGACATCAATGATACTGAAGATATGAATATTCAGACTTCACAAAATTAGAATTCGACTCTTACATAATCCCACAAGAGGAAAATCAAGCAAGAACTTTCCGACTACTAGACACAGATAATCGAATTGTACTACCCATAAATTCACCAATCCGACTAGTAGTG…	ACATCACTTAGAATACTAATTCGAACAGAACTAGGGCAACCCGGATCTCTAATTGGAGATGACCAGATCTACAACGTTATCGTTACTGCTCATGCATTCGTCATAATTTTCTTTATAGTCATACCAATCATGATTGGTGGATTCGGAAACTGGCTAGTACCACTTATATTAGGAGCCCCAGACATGGCATTCCCACGAATAAACAACATAAGATTTTGATTACTCCCACCGTCATTAACATTACTACTTACTAGCAGAACAGTAGAAAGTGGAGCAGGGACAGGATGAACAGTTTACCCCCCTCTTGCGAGAGGTATTGCCCATGCAGGAGCATCCGTAGACTTAGCCATCTTCTCTTTACATCTAGCAGGTGTTTCATCAATTTTGGGAGCAGTAAAT…	x	x
R. flavipes	A60	18	40	RfA60_1	MK295393	MK295521	MK295262	-78.6431	38.2912	13	9	14	N	1,3	ACATCACTTAGAATGCTAATTCGAACAGAACTAGGGCAACCCGGATCTCTAATTGGAGATGACCAGATCTACAACGTTATCGTTACTGCTCATGCATTCGTCATAATTTTCTTTATGGTCATACCAATCATGATTGGTGGATTTGGAAACTGACTAGTACCACTTATATTAGGAGCCCCAGACATGGCATTCCCACGAATAAACAACATAAGATTTTGATTACTCCCACCATCATTAACATTACTACTTACTAGCAGAACAGTAGAAAGTGGAGCAGGGACAGGATGAACAGTTTACCCCCCTCTTGCGAGAGGTATTGCCCATGCAGGAGCATCCGTAGACTTAGCCATCTTCTCCTTACATCTAGCAGGTGTTTCATCAATTTTGGGAGCAGTAAAT…	TTCTTCCACGATCATACACTAATAATTATATTAATAATCATCACAACCGTTATATACATAATAACCACCCTACTTTGAAATAAACATACCAGACGATTCATACTAGAAGGACAAATAATTGAAACTACATGAACAATTGCACCAGCAATTATCTTAGTATTCATTGCAATACCATCCTTACGACTTCTATACCTAATAGACGAAATCCACAACCCAACAATAACCCTAAAAGCTGTAGGACATCAATGATACTGAAGATATGAATACTCAGACTTCACAAAATTAGAATTCGACTCTTACATAATCCCACAAGAGGAAAATCAAGCAAGAACTTTCCGACTACTAGACACAGATAATCGAATTGTACTACCCATAAATTCACCAATCCGACTAGTAGTG…	ACATCACTTAGAATGCTAATTCGAACAGAACTAGGGCAACCCGGATCTCTAATTGGAGATGACCAGATCTACAACGTTATCGTTACTGCTCATGCATTCGTCATAATTTTCTTTATGGTCATACCAATCATGATTGGTGGATTTGGAAACTGACTAGTACCACTTATATTAGGAGCCCCAGACATGGCATTCCCACGAATAAACAACATAAGATTTTGATTACTCCCACCATCATTAACATTACTACTTACTAGCAGAACAGTAGAAAGTGGAGCAGGGACAGGATGAACAGTTTACCCCCCTCTTGCGAGAGGTATTGCCCATGCAGGAGCATCCGTAGACTTAGCCATCTTCTCCTTACATCTAGCAGGTGTTTCATCAATTTTGGGAGCAGTAAAT…	AGTGTCATCTTTAAGTCACAACAACCCATTATTTAACTGATTTCTTACTAAATTTTGTACGTTACTAGGGCTGTGACTGATTACTTTCACTGCAAACTGAAACTACAACCGTCTGTATGAGGAACAAGTTACATTTTTTCACTGCTTAAAACAACGGCAGCCGAAGGGACATATTTGCACCAGTTCCATCCAGTCCAAACACACACATAACGATTTATCCAGACACATATCAACGTTATTACGTGACCATC	AGTGTCATCTTTAAGTCACAACAACCCATTATTTAACTGATTTCTTACTAAATTTTGTACGTTACTAGGGCTGTGACTGATTACTTTCACTGCAAACTGAAACTACAACCGTCTGTATGAGGAACAAGTTACATTTTTTCACTGCTTAAAACAACGGCAGCCGACGGGACATATTTGCACCAGTTCCATCCAGTCCAAACACACACATAACGATTTTTCCAGACACATTTCAACGTTATTACGTGACCATC
R. flavipes	A62	19	41	RfA62b_1	MK295394	MK295522	MK295263	-78.1815	38.8051	10	8	15	N	1,2	ACATCACTTAGAATATTAATTCGAACAGAACTAGGGCAACCCGGATCTCTAATTGGAGATGACCAGATCTACAACGTTATCGTTACTGCTCATGCATTCGTCATAATTTTCTTTATAGTCATACCAATCATGATTGGTGGATTCGGAAACTGGCTAGTACCACTTATATTAGGAGCCCCAGACATGGCATTCCCACGAATAAACAACATAAGATTTTGATTACTCCCACCGTCATTAACATTACTACTTACTAGCAGAACAGTAGAAAGTGGAGCAGGGACAGGATGAACAGTTTACCCCCCTCTTGCGAGAGGTATTGCCCATGCAGGAGCATCCGTAGACTTAGCCATCTTCTCTTTACATCTAGCAGGTGTTTCATCAATTTTGGGAGCAGTAAAT…	TTCTTCCACGATCATACATTAATAATTATATTAATAATCATCACAACCGTTATATACATGATAACCACCCTACTTTGAAATAAACATACTAGACGATTCATACTAGAAGGACAACTAATTGAAACTACATGAACAATTGCACCAGCAATTATCTTAGTATTCATTGCAATACCATCCTTACGACTTCTATATCTAATAGACGAAATCCACAACCCAACAATAACCCTAAAAGCAGTAGGACATCAATGATACTGAAGATATGAATATTCAGACTTCACAAAATTAGAATTCGACTCTTACATAATCCCACAAGAGGAAAATCAAGCAAGAACTTTCCGACTACTAGACACAGATAATCGAATTGTACTACCCATAAATTCACCAATCCGACTAGTAGTG…	ACATCACTTAGAATATTAATTCGAACAGAACTAGGGCAACCCGGATCTCTAATTGGAGATGACCAGATCTACAACGTTATCGTTACTGCTCATGCATTCGTCATAATTTTCTTTATAGTCATACCAATCATGATTGGTGGATTCGGAAACTGGCTAGTACCACTTATATTAGGAGCCCCAGACATGGCATTCCCACGAATAAACAACATAAGATTTTGATTACTCCCACCGTCATTAACATTACTACTTACTAGCAGAACAGTAGAAAGTGGAGCAGGGACAGGATGAACAGTTTACCCCCCTCTTGCGAGAGGTATTGCCCATGCAGGAGCATCCGTAGACTTAGCCATCTTCTCTTTACATCTAGCAGGTGTTTCATCAATTTTGGGAGCAGTAAAT…	AGTGTCATCTTTAAGTCACAACAACCCATTATTTAACTGATTTCTTACTAAATTTTGTACGTTACTAGGGCTGTGACTGATTACTTTCACTGCAAACTGAAACTACAACCGTCTGTATGAGGAACAAGTTACATTTTTTCACTGCTTAAAACAACGGCAGCCGAAGGGACATATTTGCACCAGTTCCATCCAGTCCAAACACACACATAACGATTTATCCAGACACATATCAACGTTATTACGTGACCATC	AGTGTCATCTTTAAGTCACAACAACCCATTATTTAACTGATTTCTTACTAAATTTTGTACGTTACTAGGGCTGTGACTGATTACTTTCACTGCAAACTGAAACTACAACCGTCTGTATGAGGAACAAGTTACATTTTTTCACTGCTTAAAACAACGGCAGCCGAAGGGACATATTTGCACCAGTTCCATCCAGTCCAAACACACACATAACGATTTTTCCAGACACATTTCAACGTTATTACGTGACCATC
R. flavipes	A62	19	42	RfA62b_2	x	x	MK295264	-78.1815	38.8051	x	x	x	x	1,2	x	x	x	AGTGTCATCTTTAAGTCACAACAACCCATTATTTAACTGATTTCTTACTAAATTTTGTACGTTACTAGGGCTGTGACTGATTACTTTCACTGCAAACTGAAACTACAACCGTCTGTATGAGGAACAAGTTACATTTTTTCACTGCTTAAAACAACGGCAGCCGAAGGGACATATTTGCACCAGTTCCATCCAGTCCAAACACACACATAACGATTTATCCAGACACATATCAACGTTATTACGTGACCATC	AGTGTCATCTTTAAGTCACAACAACCCATTATTTAACTGATTTCTTACTAAATTTTGTACGTTACTAGGGCTGTGACTGATTACTTTCACTGCAAACTGAAACTACAACCGTCTGTATGAGGAACAAGTTACATTTTTTCACTGCTTAAAACAACGGCAGCCGAAGGGACATATTTGCACCAGTTCCATCCAGTCCAAACACACACATAACGATTTTTCCAGACACATTTCAACGTTATTACGTGACCATC
R. flavipes	A62	19	43	RfA62b_3	MK295395	MK295523	MK295265	-78.1815	38.8051	10	8	15	N	1,2	ACATCACTTAGAATATTAATTCGAACAGAACTAGGGCAACCCGGATCTCTAATTGGAGATGACCAGATCTACAACGTTATCGTTACTGCTCATGCATTCGTCATAATTTTCTTTATAGTCATACCAATCATGATTGGTGGATTCGGAAACTGGCTAGTACCACTTATATTAGGAGCCCCAGACATGGCATTCCCACGAATAAACAACATAAGATTTTGATTACTCCCACCGTCATTAACATTACTACTTACTAGCAGAACAGTAGAAAGTGGAGCAGGGACAGGATGAACAGTTTACCCCCCTCTTGCGAGAGGTATTGCCCATGCAGGAGCATCCGTAGACTTAGCCATCTTCTCTTTACATCTAGCAGGTGTTTCATCAATTTTGGGAGCAGTAAAT…	TTCTTCCACGATCATACATTAATAATTATATTAATAATCATCACAACCGTTATATACATGATAACCACCCTACTTTGAAATAAACATACTAGACGATTCATACTAGAAGGACAACTAATTGAAACTACATGAACAATTGCACCAGCAATTATCTTAGTATTCATTGCAATACCATCCTTACGACTTCTATATCTAATAGACGAAATCCACAACCCAACAATAACCCTAAAAGCAGTAGGACATCAATGATACTGAAGATATGAATATTCAGACTTCACAAAATTAGAATTCGACTCTTACATAATCCCACAAGAGGAAAATCAAGCAAGAACTTTCCGACTACTAGACACAGATAATCGAATTGTACTACCCATAAATTCACCAATCCGACTAGTAGTG…	ACATCACTTAGAATATTAATTCGAACAGAACTAGGGCAACCCGGATCTCTAATTGGAGATGACCAGATCTACAACGTTATCGTTACTGCTCATGCATTCGTCATAATTTTCTTTATAGTCATACCAATCATGATTGGTGGATTCGGAAACTGGCTAGTACCACTTATATTAGGAGCCCCAGACATGGCATTCCCACGAATAAACAACATAAGATTTTGATTACTCCCACCGTCATTAACATTACTACTTACTAGCAGAACAGTAGAAAGTGGAGCAGGGACAGGATGAACAGTTTACCCCCCTCTTGCGAGAGGTATTGCCCATGCAGGAGCATCCGTAGACTTAGCCATCTTCTCTTTACATCTAGCAGGTGTTTCATCAATTTTGGGAGCAGTAAAT…	AGTGTCATCTTTAAGTCACAACAACCCATTATTTAACTGATTTCTTACTAAATTTTGTACGTTACTAGGGCTGTGACTGATTACTTTCACTGCAAACTGAAACTACAACCGTCTGTATGAGGAACAAGTTACATTTTTTCACTGCTTAAAACAACGGCAGCCGAAGGGACATATTTGCACCAGTTCCATCCAGTCCAAACACACACATAACGATTTATCCAGACACATATCAACGTTATTACGTGACCATC	AGTGTCATCTTTAAGTCACAACAACCCATTATTTAACTGATTTCTTACTAAATTTTGTACGTTACTAGGGCTGTGACTGATTACTTTCACTGCAAACTGAAACTACAACCGTCTGTATGAGGAACAAGTTACATTTTTTCACTGCTTAAAACAACGGCAGCCGAAGGGACATATTTGCACCAGTTCCATCCAGTCCAAACACACACATAACGATTTTTCCAGACACATTTCAACGTTATTACGTGACCATC
R. flavipes	A64	20	44	RfA64_1	MK295396	MK295524	x	-78.3406	38.6259	10	8	15	N	x	ACATCACTTAGAATATTAATTCGAACAGAACTAGGGCAACCCGGATCTCTAATTGGAGATGACCAGATCTACAACGTTATCGTTACTGCTCATGCATTCGTCATAATTTTCTTTATAGTCATACCAATCATGATTGGTGGATTCGGAAACTGGCTAGTACCACTTATATTAGGAGCCCCAGACATGGCATTCCCACGAATAAACAACATAAGATTTTGATTACTCCCACCGTCATTAACATTACTACTTACTAGCAGAACAGTAGAAAGTGGAGCAGGGACAGGATGAACAGTTTACCCCCCTCTTGCGAGAGGTATTGCCCATGCAGGAGCATCCGTAGACTTAGCCATCTTCTCTTTACATCTAGCAGGTGTTTCATCAATTTTGGGAGCAGTAAAT…	TTCTTCCACGATCATACATTAATAATTATATTAATAATCATCACAACCGTTATATACATGATAACCACCCTACTTTGAAATAAACATACTAGACGATTCATACTAGAAGGACAACTAATTGAAACTACATGAACAATTGCACCAGCAATTATCTTAGTATTCATTGCAATACCATCCTTACGACTTCTATATCTAATAGACGAAATCCACAACCCAACAATAACCCTAAAAGCAGTAGGACATCAATGATACTGAAGATATGAATATTCAGACTTCACAAAATTAGAATTCGACTCTTACATAATCCCACAAGAGGAAAATCAAGCAAGAACTTTCCGACTACTAGACACAGATAATCGAATTGTACTACCCATAAATTCACCAATCCGACTAGTAGTG…	ACATCACTTAGAATATTAATTCGAACAGAACTAGGGCAACCCGGATCTCTAATTGGAGATGACCAGATCTACAACGTTATCGTTACTGCTCATGCATTCGTCATAATTTTCTTTATAGTCATACCAATCATGATTGGTGGATTCGGAAACTGGCTAGTACCACTTATATTAGGAGCCCCAGACATGGCATTCCCACGAATAAACAACATAAGATTTTGATTACTCCCACCGTCATTAACATTACTACTTACTAGCAGAACAGTAGAAAGTGGAGCAGGGACAGGATGAACAGTTTACCCCCCTCTTGCGAGAGGTATTGCCCATGCAGGAGCATCCGTAGACTTAGCCATCTTCTCTTTACATCTAGCAGGTGTTTCATCAATTTTGGGAGCAGTAAAT…	x	x
R. flavipes	A70	21	45	RfA70b_1	MK295397	MK295525	MK295266	-79.3498	38.0405	14	10	16	N	1,3	ACATCACTTAGAATACTAATTCGAACAGAACTAGGACAACCCGGATCTCTAATTGGAGATGACCAGATCTACAACGTTATCGTTACTGCTCATGCATTCGTCATAATTTTCTTTATAGTCATACCAATCATGATTGGTGGATTCGGAAACTGGCTAGTACCACTTATATTAGGAGCCCCAGACATGGCATTCCCACGAATAAACAACATAAGATTTTGATTACTCCCACCGTCATTAACATTACTACTTACTAGCAGAACAGTAGAAAGTGGAGCAGGGACAGGATGAACAGTTTACCCCCCTCTTGCGAGAGGTATTGCCCATGCAGGAGCATCCGTAGACTTAGCCATCTTCTCTTTACATCTAGCAGGTGTTTCATCAATTTTGGGAGCAGTAAAT…	TTCTTCCACGATCATACATTAATAATTATATTAATAATCATCACAACCGTTATATACATGATAACCACCCTACTTTGAAATAAACATATTAGACGATTCATACTAGAAGGACAACTAATTGAAACTACATGAACAATTGCACCAGCAATTATCTTAGTATTCATTGCAATACCATCCTTACGACTTCTATATCTAATAGACGAAATCCACAACCCAACAATAACCCTAAAAGCAGTAGGACATCAATGATACTGAAGATATGAATATTCAGACTTCACAAAATTAGAATTCGACTCTTACATAATCCCACAAGAGGAAAATCAAGCAAGAACTTTCCGACTACTAGACACAGATAATCGAATTGTACTACCCATAAATTCACCAATCCGACTAGTAGTG…	ACATCACTTAGAATACTAATTCGAACAGAACTAGGACAACCCGGATCTCTAATTGGAGATGACCAGATCTACAACGTTATCGTTACTGCTCATGCATTCGTCATAATTTTCTTTATAGTCATACCAATCATGATTGGTGGATTCGGAAACTGGCTAGTACCACTTATATTAGGAGCCCCAGACATGGCATTCCCACGAATAAACAACATAAGATTTTGATTACTCCCACCGTCATTAACATTACTACTTACTAGCAGAACAGTAGAAAGTGGAGCAGGGACAGGATGAACAGTTTACCCCCCTCTTGCGAGAGGTATTGCCCATGCAGGAGCATCCGTAGACTTAGCCATCTTCTCTTTACATCTAGCAGGTGTTTCATCAATTTTGGGAGCAGTAAAT…	AGTGTCATCTTTAAGTCACAACAACCCATTATTTAACTGATTTCTTACTAAATTTTGTACGTTACTAGGGCTGTGACTGATTACTTTCACTGCAAACTGAAACTACAACCGTCTGTATGAGGAACAAGTTACATTTTTTCACTGCTTAAAACAACGGCAGCCGAAGGGACATATTTGCACCAGTTCCATCCAGTCCAAACACACACATAACGATTTATCCAGACACATATCAACGTTATTACGTGACCATC	AGTGTCATCTTTAAGTCACAACAACCCATTATTTAACTGATTTCTTACTAAATTTTGTACGTTACTAGGGCTGTGACTGATTACTTTCACTGCAAACTGAAACTACAACCGTCTGTATGAGGAACAAGTTACATTTTTTCACTGCTTAAAACAACGGCAGCCGACGGGACATATTTGCACCAGTTCCATCCAGTCCAAACACACACATAACGATTTTTCCAGACACATTTCAACGTTATTACGTGACCATC
R. flavipes	A70	21	46	RfA70b_2	MK295398	MK295526	MK295267	-79.3498	38.0405	14	10	16	N	1,3	ACATCACTTAGAATACTAATTCGAACAGAACTAGGACAACCCGGATCTCTAATTGGAGATGACCAGATCTACAACGTTATCGTTACTGCTCATGCATTCGTCATAATTTTCTTTATAGTCATACCAATCATGATTGGTGGATTCGGAAACTGGCTAGTACCACTTATATTAGGAGCCCCAGACATGGCATTCCCACGAATAAACAACATAAGATTTTGATTACTCCCACCGTCATTAACATTACTACTTACTAGCAGAACAGTAGAAAGTGGAGCAGGGACAGGATGAACAGTTTACCCCCCTCTTGCGAGAGGTATTGCCCATGCAGGAGCATCCGTAGACTTAGCCATCTTCTCTTTACATCTAGCAGGTGTTTCATCAATTTTGGGAGCAGTAAAT…	TTCTTCCACGATCATACATTAATAATTATATTAATAATCATCACAACCGTTATATACATGATAACCACCCTACTTTGAAATAAACATATTAGACGATTCATACTAGAAGGACAACTAATTGAAACTACATGAACAATTGCACCAGCAATTATCTTAGTATTCATTGCAATACCATCCTTACGACTTCTATATCTAATAGACGAAATCCACAACCCAACAATAACCCTAAAAGCAGTAGGACATCAATGATACTGAAGATATGAATATTCAGACTTCACAAAATTAGAATTCGACTCTTACATAATCCCACAAGAGGAAAATCAAGCAAGAACTTTCCGACTACTAGACACAGATAATCGAATTGTACTACCCATAAATTCACCAATCCGACTAGTAGTG…	ACATCACTTAGAATACTAATTCGAACAGAACTAGGACAACCCGGATCTCTAATTGGAGATGACCAGATCTACAACGTTATCGTTACTGCTCATGCATTCGTCATAATTTTCTTTATAGTCATACCAATCATGATTGGTGGATTCGGAAACTGGCTAGTACCACTTATATTAGGAGCCCCAGACATGGCATTCCCACGAATAAACAACATAAGATTTTGATTACTCCCACCGTCATTAACATTACTACTTACTAGCAGAACAGTAGAAAGTGGAGCAGGGACAGGATGAACAGTTTACCCCCCTCTTGCGAGAGGTATTGCCCATGCAGGAGCATCCGTAGACTTAGCCATCTTCTCTTTACATCTAGCAGGTGTTTCATCAATTTTGGGAGCAGTAAAT…	AGTGTCATCTTTAAGTCACAACAACCCATTATTTAACTGATTTCTTACTAAATTTTGTACGTTACTAGGGCTGTGACTGATTACTTTCACTGCAAACTGAAACTACAACCGTCTGTATGAGGAACAAGTTACATTTTTTCACTGCTTAAAACAACGGCAGCCGAAGGGACATATTTGCACCAGTTCCATCCAGTCCAAACACACACATAACGATTTATCCAGACACATATCAACGTTATTACGTGACCATC	AGTGTCATCTTTAAGTCACAACAACCCATTATTTAACTGATTTCTTACTAAATTTTGTACGTTACTAGGGCTGTGACTGATTACTTTCACTGCAAACTGAAACTACAACCGTCTGTATGAGGAACAAGTTACATTTTTTCACTGCTTAAAACAACGGCAGCCGACGGGACATATTTGCACCAGTTCCATCCAGTCCAAACACACACATAACGATTTTTCCAGACACATTTCAACGTTATTACGTGACCATC
R. flavipes	A70	21	47	RfA70b_3	MK295399	MK295527	MK295268	-79.3498	38.0405	14	10	16	N	1,3	ACATCACTTAGAATACTAATTCGAACAGAACTAGGACAACCCGGATCTCTAATTGGAGATGACCAGATCTACAACGTTATCGTTACTGCTCATGCATTCGTCATAATTTTCTTTATAGTCATACCAATCATGATTGGTGGATTCGGAAACTGGCTAGTACCACTTATATTAGGAGCCCCAGACATGGCATTCCCACGAATAAACAACATAAGATTTTGATTACTCCCACCGTCATTAACATTACTACTTACTAGCAGAACAGTAGAAAGTGGAGCAGGGACAGGATGAACAGTTTACCCCCCTCTTGCGAGAGGTATTGCCCATGCAGGAGCATCCGTAGACTTAGCCATCTTCTCTTTACATCTAGCAGGTGTTTCATCAATTTTGGGAGCAGTAAAT…	TTCTTCCACGATCATACATTAATAATTATATTAATAATCATCACAACCGTTATATACATGATAACCACCCTACTTTGAAATAAACATATTAGACGATTCATACTAGAAGGACAACTAATTGAAACTACATGAACAATTGCACCAGCAATTATCTTAGTATTCATTGCAATACCATCCTTACGACTTCTATATCTAATAGACGAAATCCACAACCCAACAATAACCCTAAAAGCAGTAGGACATCAATGATACTGAAGATATGAATATTCAGACTTCACAAAATTAGAATTCGACTCTTACATAATCCCACAAGAGGAAAATCAAGCAAGAACTTTCCGACTACTAGACACAGATAATCGAATTGTACTACCCATAAATTCACCAATCCGACTAGTAGTG…	ACATCACTTAGAATACTAATTCGAACAGAACTAGGACAACCCGGATCTCTAATTGGAGATGACCAGATCTACAACGTTATCGTTACTGCTCATGCATTCGTCATAATTTTCTTTATAGTCATACCAATCATGATTGGTGGATTCGGAAACTGGCTAGTACCACTTATATTAGGAGCCCCAGACATGGCATTCCCACGAATAAACAACATAAGATTTTGATTACTCCCACCGTCATTAACATTACTACTTACTAGCAGAACAGTAGAAAGTGGAGCAGGGACAGGATGAACAGTTTACCCCCCTCTTGCGAGAGGTATTGCCCATGCAGGAGCATCCGTAGACTTAGCCATCTTCTCTTTACATCTAGCAGGTGTTTCATCAATTTTGGGAGCAGTAAAT…	AGTGTCATCTTTAAGTCACAACAACCCATTATTTAACTGATTTCTTACTAAATTTTGTACGTTACTAGGGCTGTGACTGATTACTTTCACTGCAAACTGAAACTACAACCGTCTGTATGAGGAACAAGTTACATTTTTTCACTGCTTAAAACAACGGCAGCCGAAGGGACATATTTGCACCAGTTCCATCCAGTCCAAACACACACATAACGATTTATCCAGACACATATCAACGTTATTACGTGACCATC	AGTGTCATCTTTAAGTCACAACAACCCATTATTTAACTGATTTCTTACTAAATTTTGTACGTTACTAGGGCTGTGACTGATTACTTTCACTGCAAACTGAAACTACAACCGTCTGTATGAGGAACAAGTTACATTTTTTCACTGCTTAAAACAACGGCAGCCGACGGGACATATTTGCACCAGTTCCATCCAGTCCAAACACACACATAACGATTTTTCCAGACACATTTCAACGTTATTACGTGACCATC
R. flavipes	A73	22	48	RfA73_1	MK295400	MK295528	MK295269	-87.5268	35.3938	1	5	6	C	1,3	ACATCACTTAGAATACTAATTCGAACAGAACTAGGGCAACCCGGATCTCTAATTGGAGATGACCAGATCTACAACGTTATCGTTACTGCTCATGCATTCGTCATAATTTTCTTTATAGTCATACCAATCATGATTGGTGGATTCGGAAACTGATTAGTACCACTTATATTAGGAGCCCCAGACATGGCATTCCCACGAATAAACAACATAAGATTTTGATTACTCCCACCGTCATTAACATTACTACTTACTAGCAGAACAGTAGAAAGTGGAGCAGGGACAGGATGAACAGTCTACCCCCCTCTTGCGAGAGGTATTGCCCATGCAGGAGCATCCGTAGACTTAGCCATCTTCTCCTTACATCTAGCAGGTGTTTCATCAATTTTGGGAGCAGTAAAT…	TTCTTCCACGATCATACATTAATAATTATATTAATAATCATCACAACCGTTATATACATGATAACCACCCTACTTTGAAATAAACATACTAGACGATTCATACTAGAAGGACAACTAATTGAAACTACATGAACAATTGCACCAGCAATTATCTTAGTATTCATTGCAATACCATCCTTACGACTTCTATATCTAATAGACGAAATCCACAACCCAACAATAACCCTAAAAGCAGTGGGACATCAATGATACTGAAGATATGAATATTCAGACTTCACAAAATTAGAATTCGACTCTTACATAATCCCACAAGAGGAAAATCAAGCAAGAACTTTCCGACTACTAGACACAGATAATCGAATTGTACTACCCATAAATTCACCAATCCGACTAGTAGTG…	ACATCACTTAGAATACTAATTCGAACAGAACTAGGGCAACCCGGATCTCTAATTGGAGATGACCAGATCTACAACGTTATCGTTACTGCTCATGCATTCGTCATAATTTTCTTTATAGTCATACCAATCATGATTGGTGGATTCGGAAACTGATTAGTACCACTTATATTAGGAGCCCCAGACATGGCATTCCCACGAATAAACAACATAAGATTTTGATTACTCCCACCGTCATTAACATTACTACTTACTAGCAGAACAGTAGAAAGTGGAGCAGGGACAGGATGAACAGTCTACCCCCCTCTTGCGAGAGGTATTGCCCATGCAGGAGCATCCGTAGACTTAGCCATCTTCTCCTTACATCTAGCAGGTGTTTCATCAATTTTGGGAGCAGTAAAT…	AGTGTCATCTTTAAGTCACAACAACCCATTATTTAACTGATTTCTTACTAAATTTTGTACGTTACTAGGGCTGTGACTGATTACTTTCACTGCAAACTGAAACTACAACCGTCTGTATGAGGAACAAGTTACATTTTTTCACTGCTTAAAACAACGGCAGCCGAAGGGACATATTTGCACCAGTTCCATCCAGTCCAAACACACACATAACGATTTATCCAGACACATATCAACGTTATTACGTGACCATC	AGTGTCATCTTTAAGTCACAACAACCCATTATTTAACTGATTTCTTACTAAATTTTGTACGTTACTAGGGCTGTGACTGATTACTTTCACTGCAAACTGAAACTACAACCGTCTGTATGAGGAACAAGTTACATTTTTTCACTGCTTAAAACAACGGCAGCCGACGGGACATATTTGCACCAGTTCCATCCAGTCCAAACACACACATAACGATTTTTCCAGACACATTTCAACGTTATTACGTGACCATC
R. flavipes	A73	22	49	RfA73_3	MK295401	MK295529	MK295270	-87.5268	35.3938	1	5	6	C	1,3	ACATCACTTAGAATACTAATTCGAACAGAACTAGGGCAACCCGGATCTCTAATTGGAGATGACCAGATCTACAACGTTATCGTTACTGCTCATGCATTCGTCATAATTTTCTTTATAGTCATACCAATCATGATTGGTGGATTCGGAAACTGATTAGTACCACTTATATTAGGAGCCCCAGACATGGCATTCCCACGAATAAACAACATAAGATTTTGATTACTCCCACCGTCATTAACATTACTACTTACTAGCAGAACAGTAGAAAGTGGAGCAGGGACAGGATGAACAGTCTACCCCCCTCTTGCGAGAGGTATTGCCCATGCAGGAGCATCCGTAGACTTAGCCATCTTCTCCTTACATCTAGCAGGTGTTTCATCAATTTTGGGAGCAGTAAAT…	TTCTTCCACGATCATACATTAATAATTATATTAATAATCATCACAACCGTTATATACATGATAACCACCCTACTTTGAAATAAACATACTAGACGATTCATACTAGAAGGACAACTAATTGAAACTACATGAACAATTGCACCAGCAATTATCTTAGTATTCATTGCAATACCATCCTTACGACTTCTATATCTAATAGACGAAATCCACAACCCAACAATAACCCTAAAAGCAGTGGGACATCAATGATACTGAAGATATGAATATTCAGACTTCACAAAATTAGAATTCGACTCTTACATAATCCCACAAGAGGAAAATCAAGCAAGAACTTTCCGACTACTAGACACAGATAATCGAATTGTACTACCCATAAATTCACCAATCCGACTAGTAGTG…	ACATCACTTAGAATACTAATTCGAACAGAACTAGGGCAACCCGGATCTCTAATTGGAGATGACCAGATCTACAACGTTATCGTTACTGCTCATGCATTCGTCATAATTTTCTTTATAGTCATACCAATCATGATTGGTGGATTCGGAAACTGATTAGTACCACTTATATTAGGAGCCCCAGACATGGCATTCCCACGAATAAACAACATAAGATTTTGATTACTCCCACCGTCATTAACATTACTACTTACTAGCAGAACAGTAGAAAGTGGAGCAGGGACAGGATGAACAGTCTACCCCCCTCTTGCGAGAGGTATTGCCCATGCAGGAGCATCCGTAGACTTAGCCATCTTCTCCTTACATCTAGCAGGTGTTTCATCAATTTTGGGAGCAGTAAAT…	AGTGTCATCTTTAAGTCACAACAACCCATTATTTAACTGATTTCTTACTAAATTTTGTACGTTACTAGGGCTGTGACTGATTACTTTCACTGCAAACTGAAACTACAACCGTCTGTATGAGGAACAAGTTACATTTTTTCACTGCTTAAAACAACGGCAGCCGAAGGGACATATTTGCACCAGTTCCATCCAGTCCAAACACACACATAACGATTTATCCAGACACATATCAACGTTATTACGTGACCATC	AGTGTCATCTTTAAGTCACAACAACCCATTATTTAACTGATTTCTTACTAAATTTTGTACGTTACTAGGGCTGTGACTGATTACTTTCACTGCAAACTGAAACTACAACCGTCTGTATGAGGAACAAGTTACATTTTTTCACTGCTTAAAACAACGGCAGCCGACGGGACATATTTGCACCAGTTCCATCCAGTCCAAACACACACATAACGATTTTTCCAGACACATTTCAACGTTATTACGTGACCATC
R. flavipes	A75	23	50	RfA75_1	MK295402	MK295530	MK295271	-84.7448	36.1245	8	6	9	C	1,3	ACATCACTTAGAATACTAATTCGAACAGAACTAGGGCAACCCGGATCTCTAATTGGAGATGACCAGATCTACAACGTTATCGTTACTGCTCATGCATTCGTCATAATTTTCTTTATAGTCATACCAATCATGATTGGTGGATTCGGAAACTGATTAGTACCACTTATATTAGGAGCCCCAGACATGGCATTCCCACGAATAAACAACATAAGATTTTGATTACTCCCACCGTCATTAACATTACTACTTACTAGCAGAACAGTAGAAAGTGGAGCAGGGACAGGATGAACAGTCTACCCCCCTCTTGCGAGAGGTATTGCCCATGCAGGAGCATCCGTAGACTTAGCCATCTTCTCCTTACATCTAGCAGGTGTTTCATCAATTTTGGGAGCAGTAAAT…	TTCTTCCACGATCATACATTAATAATTATATTAATAATCATCACAACCGTTATATACATGATAACCACCCTACTTTGAAATAAACATACTAGACGATTCATACTAGAAGGACAACTAATTGAAACTACATGAACAATTGCACCAGCAATTATCTTAGTATTCATTGCAATACCATCCTTACGACTTCTATATCTAATAGACGAAATCCACAACCCAACAATAACCCTAAAAGCAGTGGGACATCAATGATACTGAAGATATGAATATTCAGACTTCACAAAATTAGAATTTGACTCTTACATAATCCCACAAGAGGAAAATCAAGCAAGAACTTTCCGACTACTAGACACAGATAATCGAATTGTACTACCCATAAATTCACCAATCCGACTAGTAGTG…	ACATCACTTAGAATACTAATTCGAACAGAACTAGGGCAACCCGGATCTCTAATTGGAGATGACCAGATCTACAACGTTATCGTTACTGCTCATGCATTCGTCATAATTTTCTTTATAGTCATACCAATCATGATTGGTGGATTCGGAAACTGATTAGTACCACTTATATTAGGAGCCCCAGACATGGCATTCCCACGAATAAACAACATAAGATTTTGATTACTCCCACCGTCATTAACATTACTACTTACTAGCAGAACAGTAGAAAGTGGAGCAGGGACAGGATGAACAGTCTACCCCCCTCTTGCGAGAGGTATTGCCCATGCAGGAGCATCCGTAGACTTAGCCATCTTCTCCTTACATCTAGCAGGTGTTTCATCAATTTTGGGAGCAGTAAAT…	AGTGTCATCTTTAAGTCACAACAACCCATTATTTAACTGATTTCTTACTAAATTTTGTACGTTACTAGGGCTGTGACTGATTACTTTCACTGCAAACTGAAACTACAACCGTCTGTATGAGGAACAAGTTACATTTTTTCACTGCTTAAAACAACGGCAGCCGAAGGGACATATTTGCACCAGTTCCATCCAGTCCAAACACACACATAACGATTTATCCAGACACATATCAACGTTATTACGTGACCATC	AGTGTCATCTTTAAGTCACAACAACCCATTATTTAACTGATTTCTTACTAAATTTTGTACGTTACTAGGGCTGTGACTGATTACTTTCACTGCAAACTGAAACTACAACCGTCTGTATGAGGAACAAGTTACATTTTTTCACTGCTTAAAACAACGGCAGCCGACGGGACATATTTGCACCAGTTCCATCCAGTCCAAACACACACATAACGATTTTTCCAGACACATTTCAACGTTATTACGTGACCATC
R. flavipes	A75	23	51	RfA75_3	MK295403	MK295531	MK295272	-84.7448	36.1245	8	6	9	C	1,3	ACATCACTTAGAATACTAATTCGAACAGAACTAGGGCAACCCGGATCTCTAATTGGAGATGACCAGATCTACAACGTTATCGTTACTGCTCATGCATTCGTCATAATTTTCTTTATAGTCATACCAATCATGATTGGTGGATTCGGAAACTGATTAGTACCACTTATATTAGGAGCCCCAGACATGGCATTCCCACGAATAAACAACATAAGATTTTGATTACTCCCACCGTCATTAACATTACTACTTACTAGCAGAACAGTAGAAAGTGGAGCAGGGACAGGATGAACAGTCTACCCCCCTCTTGCGAGAGGTATTGCCCATGCAGGAGCATCCGTAGACTTAGCCATCTTCTCCTTACATCTAGCAGGTGTTTCATCAATTTTGGGAGCAGTAAAT…	TTCTTCCACGATCATACATTAATAATTATATTAATAATCATCACAACCGTTATATACATGATAACCACCCTACTTTGAAATAAACATACTAGACGATTCATACTAGAAGGACAACTAATTGAAACTACATGAACAATTGCACCAGCAATTATCTTAGTATTCATTGCAATACCATCCTTACGACTTCTATATCTAATAGACGAAATCCACAACCCAACAATAACCCTAAAAGCAGTGGGACATCAATGATACTGAAGATATGAATATTCAGACTTCACAAAATTAGAATTTGACTCTTACATAATCCCACAAGAGGAAAATCAAGCAAGAACTTTCCGACTACTAGACACAGATAATCGAATTGTACTACCCATAAATTCACCAATCCGACTAGTAGTG…	ACATCACTTAGAATACTAATTCGAACAGAACTAGGGCAACCCGGATCTCTAATTGGAGATGACCAGATCTACAACGTTATCGTTACTGCTCATGCATTCGTCATAATTTTCTTTATAGTCATACCAATCATGATTGGTGGATTCGGAAACTGATTAGTACCACTTATATTAGGAGCCCCAGACATGGCATTCCCACGAATAAACAACATAAGATTTTGATTACTCCCACCGTCATTAACATTACTACTTACTAGCAGAACAGTAGAAAGTGGAGCAGGGACAGGATGAACAGTCTACCCCCCTCTTGCGAGAGGTATTGCCCATGCAGGAGCATCCGTAGACTTAGCCATCTTCTCCTTACATCTAGCAGGTGTTTCATCAATTTTGGGAGCAGTAAAT…	AGTGTCATCTTTAAGTCACAACAACCCATTATTTAACTGATTTCTTACTAAATTTTGTACGTTACTAGGGCTGTGACTGATTACTTTCACTGCAAACTGAAACTACAACCGTCTGTATGAGGAACAAGTTACATTTTTTCACTGCTTAAAACAACGGCAGCCGAAGGGACATATTTGCACCAGTTCCATCCAGTCCAAACACACACATAACGATTTATCCAGACACATATCAACGTTATTACGTGACCATC	AGTGTCATCTTTAAGTCACAACAACCCATTATTTAACTGATTTCTTACTAAATTTTGTACGTTACTAGGGCTGTGACTGATTACTTTCACTGCAAACTGAAACTACAACCGTCTGTATGAGGAACAAGTTACATTTTTTCACTGCTTAAAACAACGGCAGCCGACGGGACATATTTGCACCAGTTCCATCCAGTCCAAACACACACATAACGATTTTTCCAGACACATTTCAACGTTATTACGTGACCATC
R. flavipes	A76	24	52	RfA76_1	MK295404	MK295532	MK295273	-84.4883	36.1361	6	6	7	C	1,3	ACATCACTTAGAATACTAATTCGAACAGAACTAGGGCAACCCGGATCTCTAATTGGAGATGACCAGATCTACAACGTTATCGTTACTGCTCATGCATTCGTCATAATTTTCTTTATAGTAATACCAATCATGATTGGTGGATTCGGAAACTGATTAGTACCACTTATATTAGGAGCCCCAGACATGGCATTCCCACGAATAAACAACATAAGATTTTGATTACTCCCACCGTCATTAACATTACTACTTACTAGCAGAACAGTAGAAAGTGGAGCAGGGACAGGATGAACAGTCTACCCCCCTCTTGCGAGAGGTATTGCCCATGCAGGAGCATCCGTAGACTTAGCCATCTTCTCCTTACATCTAGCAGGTGTTTCATCAATTTTGGGAGCAGTAAAT…	TTCTTCCACGATCATACATTAATAATTATATTAATAATCATCACAACCGTTATATACATGATAACCACCCTACTTTGAAATAAACATACTAGACGATTCATACTAGAAGGACAACTAATTGAAACTACATGAACAATTGCACCAGCAATTATCTTAGTATTCATTGCAATACCATCCTTACGACTTCTATATCTAATAGACGAAATCCACAACCCAACAATAACCCTAAAAGCAGTGGGACATCAATGATACTGAAGATATGAATATTCAGACTTCACAAAATTAGAATTTGACTCTTACATAATCCCACAAGAGGAAAATCAAGCAAGAACTTTCCGACTACTAGACACAGATAATCGAATTGTACTACCCATAAATTCACCAATCCGACTAGTAGTG…	ACATCACTTAGAATACTAATTCGAACAGAACTAGGGCAACCCGGATCTCTAATTGGAGATGACCAGATCTACAACGTTATCGTTACTGCTCATGCATTCGTCATAATTTTCTTTATAGTAATACCAATCATGATTGGTGGATTCGGAAACTGATTAGTACCACTTATATTAGGAGCCCCAGACATGGCATTCCCACGAATAAACAACATAAGATTTTGATTACTCCCACCGTCATTAACATTACTACTTACTAGCAGAACAGTAGAAAGTGGAGCAGGGACAGGATGAACAGTCTACCCCCCTCTTGCGAGAGGTATTGCCCATGCAGGAGCATCCGTAGACTTAGCCATCTTCTCCTTACATCTAGCAGGTGTTTCATCAATTTTGGGAGCAGTAAAT…	AGTGTCATCTTTAAGTCACAACAACCCATTATTTAACTGATTTCTTACTAAATTTTGTACGTTACTAGGGCTGTGACTGATTACTTTCACTGCAAACTGAAACTACAACCGTCTGTATGAGGAACAAGTTACATTTTTTCACTGCTTAAAACAACGGCAGCCGAAGGGACATATTTGCACCAGTTCCATCCAGTCCAAACACACACATAACGATTTATCCAGACACATATCAACGTTATTACGTGACCATC	AGTGTCATCTTTAAGTCACAACAACCCATTATTTAACTGATTTCTTACTAAATTTTGTACGTTACTAGGGCTGTGACTGATTACTTTCACTGCAAACTGAAACTACAACCGTCTGTATGAGGAACAAGTTACATTTTTTCACTGCTTAAAACAACGGCAGCCGACGGGACATATTTGCACCAGTTCCATCCAGTCCAAACACACACATAACGATTTTTCCAGACACATTTCAACGTTATTACGTGACCATC
R. flavipes	A76	24	53	RfA76_3	MK295405	MK295533	MK295274	-84.4883	36.1361	6	6	7	C	1,3	ACATCACTTAGAATACTAATTCGAACAGAACTAGGGCAACCCGGATCTCTAATTGGAGATGACCAGATCTACAACGTTATCGTTACTGCTCATGCATTCGTCATAATTTTCTTTATAGTAATACCAATCATGATTGGTGGATTCGGAAACTGATTAGTACCACTTATATTAGGAGCCCCAGACATGGCATTCCCACGAATAAACAACATAAGATTTTGATTACTCCCACCGTCATTAACATTACTACTTACTAGCAGAACAGTAGAAAGTGGAGCAGGGACAGGATGAACAGTCTACCCCCCTCTTGCGAGAGGTATTGCCCATGCAGGAGCATCCGTAGACTTAGCCATCTTCTCCTTACATCTAGCAGGTGTTTCATCAATTTTGGGAGCAGTAAAT…	TTCTTCCACGATCATACATTAATAATTATATTAATAATCATCACAACCGTTATATACATGATAACCACCCTACTTTGAAATAAACATACTAGACGATTCATACTAGAAGGACAACTAATTGAAACTACATGAACAATTGCACCAGCAATTATCTTAGTATTCATTGCAATACCATCCTTACGACTTCTATATCTAATAGACGAAATCCACAACCCAACAATAACCCTAAAAGCAGTGGGACATCAATGATACTGAAGATATGAATATTCAGACTTCACAAAATTAGAATTTGACTCTTACATAATCCCACAAGAGGAAAATCAAGCAAGAACTTTCCGACTACTAGACACAGATAATCGAATTGTACTACCCATAAATTCACCAATCCGACTAGTAGTG…	ACATCACTTAGAATACTAATTCGAACAGAACTAGGGCAACCCGGATCTCTAATTGGAGATGACCAGATCTACAACGTTATCGTTACTGCTCATGCATTCGTCATAATTTTCTTTATAGTAATACCAATCATGATTGGTGGATTCGGAAACTGATTAGTACCACTTATATTAGGAGCCCCAGACATGGCATTCCCACGAATAAACAACATAAGATTTTGATTACTCCCACCGTCATTAACATTACTACTTACTAGCAGAACAGTAGAAAGTGGAGCAGGGACAGGATGAACAGTCTACCCCCCTCTTGCGAGAGGTATTGCCCATGCAGGAGCATCCGTAGACTTAGCCATCTTCTCCTTACATCTAGCAGGTGTTTCATCAATTTTGGGAGCAGTAAAT…	AGTGTCATCTTTAAGTCACAACAACCCATTATTTAACTGATTTCTTACTAAATTTTGTACGTTACTAGGGCTGTGACTGATTACTTTCACTGCAAACTGAAACTACAACCGTCTGTATGAGGAACAAGTTACATTTTTTCACTGCTTAAAACAACGGCAGCCGAAGGGACATATTTGCACCAGTTCCATCCAGTCCAAACACACACATAACGATTTATCCAGACACATATCAACGTTATTACGTGACCATC	AGTGTCATCTTTAAGTCACAACAACCCATTATTTAACTGATTTCTTACTAAATTTTGTACGTTACTAGGGCTGTGACTGATTACTTTCACTGCAAACTGAAACTACAACCGTCTGTATGAGGAACAAGTTACATTTTTTCACTGCTTAAAACAACGGCAGCCGACGGGACATATTTGCACCAGTTCCATCCAGTCCAAACACACACATAACGATTTTTCCAGACACATTTCAACGTTATTACGTGACCATC
R. flavipes	A85	25	54	RfA85_1	MK295406	MK295534	MK295275	-85.4997	34.8469	6	6	7	C	1,3	ACATCACTTAGAATACTAATTCGAACAGAACTAGGGCAACCCGGATCTCTAATTGGAGATGACCAGATCTACAACGTTATCGTTACTGCTCATGCATTCGTCATAATTTTCTTTATAGTAATACCAATCATGATTGGTGGATTCGGAAACTGATTAGTACCACTTATATTAGGAGCCCCAGACATGGCATTCCCACGAATAAACAACATAAGATTTTGATTACTCCCACCGTCATTAACATTACTACTTACTAGCAGAACAGTAGAAAGTGGAGCAGGGACAGGATGAACAGTCTACCCCCCTCTTGCGAGAGGTATTGCCCATGCAGGAGCATCCGTAGACTTAGCCATCTTCTCCTTACATCTAGCAGGTGTTTCATCAATTTTGGGAGCAGTAAAT…	TTCTTCCACGATCATACATTAATAATTATATTAATAATCATCACAACCGTTATATACATGATAACCACCCTACTTTGAAATAAACATACTAGACGATTCATACTAGAAGGACAACTAATTGAAACTACATGAACAATTGCACCAGCAATTATCTTAGTATTCATTGCAATACCATCCTTACGACTTCTATATCTAATAGACGAAATCCACAACCCAACAATAACCCTAAAAGCAGTGGGACATCAATGATACTGAAGATATGAATATTCAGACTTCACAAAATTAGAATTTGACTCTTACATAATCCCACAAGAGGAAAATCAAGCAAGAACTTTCCGACTACTAGACACAGATAATCGAATTGTACTACCCATAAATTCACCAATCCGACTAGTAGTG…	ACATCACTTAGAATACTAATTCGAACAGAACTAGGGCAACCCGGATCTCTAATTGGAGATGACCAGATCTACAACGTTATCGTTACTGCTCATGCATTCGTCATAATTTTCTTTATAGTAATACCAATCATGATTGGTGGATTCGGAAACTGATTAGTACCACTTATATTAGGAGCCCCAGACATGGCATTCCCACGAATAAACAACATAAGATTTTGATTACTCCCACCGTCATTAACATTACTACTTACTAGCAGAACAGTAGAAAGTGGAGCAGGGACAGGATGAACAGTCTACCCCCCTCTTGCGAGAGGTATTGCCCATGCAGGAGCATCCGTAGACTTAGCCATCTTCTCCTTACATCTAGCAGGTGTTTCATCAATTTTGGGAGCAGTAAAT…	AGTGTCATCTTTAAGTCACAACAACCCATTATTTAACTGATTTCTTACTAAATTTTGTACGTTACTAGGGCTGTGACTGATTACTTTCACTGCAAACTGAAACTACAACCGTCTGTATGAGGAACAAGTTACATTTTTTCACTGCTTAAAACAACGGCAGCCGAAGGGACATATTTGCACCAGTTCCATCCAGTCCAAACACACACATAACGATTTATCCAGACACATATCAACGTTATTACGTGACCATC	AGTGTCATCTTTAAGTCACAACAACCCATTATTTAACTGATTTCTTACTAAATTTTGTACGTTACTAGGGCTGTGACTGATTACTTTCACTGCAAACTGAAACTACAACCGTCTGTATGAGGAACAAGTTACATTTTTTCACTGCTTAAAACAACGGCAGCCGACGGGACATATTTGCACCAGTTCCATCCAGTCCAAACACACACATAACGATTTTTCCAGACACATTTCAACGTTATTACGTGACCATC
R. flavipes	A85	25	55	RfA85_3	MK295407	MK295535	MK295276	-85.4997	34.8469	6	6	7	C	1,3	ACATCACTTAGAATACTAATTCGAACAGAACTAGGGCAACCCGGATCTCTAATTGGAGATGACCAGATCTACAACGTTATCGTTACTGCTCATGCATTCGTCATAATTTTCTTTATAGTAATACCAATCATGATTGGTGGATTCGGAAACTGATTAGTACCACTTATATTAGGAGCCCCAGACATGGCATTCCCACGAATAAACAACATAAGATTTTGATTACTCCCACCGTCATTAACATTACTACTTACTAGCAGAACAGTAGAAAGTGGAGCAGGGACAGGATGAACAGTCTACCCCCCTCTTGCGAGAGGTATTGCCCATGCAGGAGCATCCGTAGACTTAGCCATCTTCTCCTTACATCTAGCAGGTGTTTCATCAATTTTGGGAGCAGTAAAT…	TTCTTCCACGATCATACATTAATAATTATATTAATAATCATCACAACCGTTATATACATGATAACCACCCTACTTTGAAATAAACATACTAGACGATTCATACTAGAAGGACAACTAATTGAAACTACATGAACAATTGCACCAGCAATTATCTTAGTATTCATTGCAATACCATCCTTACGACTTCTATATCTAATAGACGAAATCCACAACCCAACAATAACCCTAAAAGCAGTGGGACATCAATGATACTGAAGATATGAATATTCAGACTTCACAAAATTAGAATTTGACTCTTACATAATCCCACAAGAGGAAAATCAAGCAAGAACTTTCCGACTACTAGACACAGATAATCGAATTGTACTACCCATAAATTCACCAATCCGACTAGTAGTG…	ACATCACTTAGAATACTAATTCGAACAGAACTAGGGCAACCCGGATCTCTAATTGGAGATGACCAGATCTACAACGTTATCGTTACTGCTCATGCATTCGTCATAATTTTCTTTATAGTAATACCAATCATGATTGGTGGATTCGGAAACTGATTAGTACCACTTATATTAGGAGCCCCAGACATGGCATTCCCACGAATAAACAACATAAGATTTTGATTACTCCCACCGTCATTAACATTACTACTTACTAGCAGAACAGTAGAAAGTGGAGCAGGGACAGGATGAACAGTCTACCCCCCTCTTGCGAGAGGTATTGCCCATGCAGGAGCATCCGTAGACTTAGCCATCTTCTCCTTACATCTAGCAGGTGTTTCATCAATTTTGGGAGCAGTAAAT…	AGTGTCATCTTTAAGTCACAACAACCCATTATTTAACTGATTTCTTACTAAATTTTGTACGTTACTAGGGCTGTGACTGATTACTTTCACTGCAAACTGAAACTACAACCGTCTGTATGAGGAACAAGTTACATTTTTTCACTGCTTAAAACAACGGCAGCCGAAGGGACATATTTGCACCAGTTCCATCCAGTCCAAACACACACATAACGATTTATCCAGACACATATCAACGTTATTACGTGACCATC	AGTGTCATCTTTAAGTCACAACAACCCATTATTTAACTGATTTCTTACTAAATTTTGTACGTTACTAGGGCTGTGACTGATTACTTTCACTGCAAACTGAAACTACAACCGTCTGTATGAGGAACAAGTTACATTTTTTCACTGCTTAAAACAACGGCAGCCGACGGGACATATTTGCACCAGTTCCATCCAGTCCAAACACACACATAACGATTTTTCCAGACACATTTCAACGTTATTACGTGACCATC
R. flavipes	A86	26	56	RfA86b_1	x	x	MK295277	-88.193	34.605	x	x	x	x	2,5	x	x	x	AGTGTCATCTTTAAGTCACAACAACCCATTATTTAACTGATTTCTTACTAAATTTTGTACGTTACTAGGGCTGTGACTGATTACTTTCACTGCAAACTGAAACTACAACCGTCTGTATGAGGAACAAGTTACATTTTTTCACTGCTTAAAACAACGGCAGCCGAAGGGACATATTTGCACCAGTTCCATCCAGTCCAAACACACACATAACGATTTTTCCAGACACATTTCAACGTTATTACGTGACCATC	AGTGTCATCTTTAAGTCACAACAACCCATTATTTAACTGATTTCTTACTAAATTTTGTACGTTACTAGGGCTGTGACTGATTACTTTCACTGCAAACTGAAACTACAACCGTCTGTATGAGGAACAAGTTACATTTTTTTACTGCTTAAAACAACGGCAGCCGACGGGACATATTTGCACCAGTTCCATCCAGTCCAAACACACACATAACGATTTTTCCAGACACATTTCAACGTTATTACGTGACCATC
R. flavipes	A86	26	57	RfA86b_2	MK295408	MK295536	MK295278	-88.193	34.605	15	6	17	C	2,5	ACATCACTTAGAATACTAATTCGAACAGAACTAGGGCAACCCGGATCTCTAATTGGAGATGACCAGATCTACAACGTTATCGTTACTGCTCATGCATTCGTCATAATTTTCTTTATAGTTATACCAATCATGATTGGTGGATTCGGAAACTGATTAGTACCACTTATATTAGGAGCCCCAGACATGGCATTCCCACGAATAAACAACATAAGATTTTGATTACTCCCACCGTCATTAACATTACTACTTACTAGCAGAACAGTAGAAAGTGGAGCAGGGACAGGATGAACAGTCTACCCCCCTCTTGCGAGAGGTATTGCCCATGCAGGAGCATCCGTAGACTTAGCCATCTTCTCCTTACATCTAGCAGGTGTTTCATCAATTTTGGGAGCAGTAAAT…	TTCTTCCACGATCATACATTAATAATTATATTAATAATCATCACAACCGTTATATACATGATAACCACCCTACTTTGAAATAAACATACTAGACGATTCATACTAGAAGGACAACTAATTGAAACTACATGAACAATTGCACCAGCAATTATCTTAGTATTCATTGCAATACCATCCTTACGACTTCTATATCTAATAGACGAAATCCACAACCCAACAATAACCCTAAAAGCAGTGGGACATCAATGATACTGAAGATATGAATATTCAGACTTCACAAAATTAGAATTTGACTCTTACATAATCCCACAAGAGGAAAATCAAGCAAGAACTTTCCGACTACTAGACACAGATAATCGAATTGTACTACCCATAAATTCACCAATCCGACTAGTAGTG…	ACATCACTTAGAATACTAATTCGAACAGAACTAGGGCAACCCGGATCTCTAATTGGAGATGACCAGATCTACAACGTTATCGTTACTGCTCATGCATTCGTCATAATTTTCTTTATAGTTATACCAATCATGATTGGTGGATTCGGAAACTGATTAGTACCACTTATATTAGGAGCCCCAGACATGGCATTCCCACGAATAAACAACATAAGATTTTGATTACTCCCACCGTCATTAACATTACTACTTACTAGCAGAACAGTAGAAAGTGGAGCAGGGACAGGATGAACAGTCTACCCCCCTCTTGCGAGAGGTATTGCCCATGCAGGAGCATCCGTAGACTTAGCCATCTTCTCCTTACATCTAGCAGGTGTTTCATCAATTTTGGGAGCAGTAAAT…	AGTGTCATCTTTAAGTCACAACAACCCATTATTTAACTGATTTCTTACTAAATTTTGTACGTTACTAGGGCTGTGACTGATTACTTTCACTGCAAACTGAAACTACAACCGTCTGTATGAGGAACAAGTTACATTTTTTCACTGCTTAAAACAACGGCAGCCGAAGGGACATATTTGCACCAGTTCCATCCAGTCCAAACACACACATAACGATTTTTCCAGACACATTTCAACGTTATTACGTGACCATC	AGTGTCATCTTTAAGTCACAACAACCCATTATTTAACTGATTTCTTACTAAATTTTGTACGTTACTAGGGCTGTGACTGATTACTTTCACTGCAAACTGAAACTACAACCGTCTGTATGAGGAACAAGTTACATTTTTTTACTGCTTAAAACAACGGCAGCCGACGGGACATATTTGCACCAGTTCCATCCAGTCCAAACACACACATAACGATTTTTCCAGACACATTTCAACGTTATTACGTGACCATC
R. flavipes	A86	26	58	RfA86b_3	MK295409	MK295537	MK295279	-88.193	34.605	15	6	17	C	2,5	ACATCACTTAGAATACTAATTCGAACAGAACTAGGGCAACCCGGATCTCTAATTGGAGATGACCAGATCTACAACGTTATCGTTACTGCTCATGCATTCGTCATAATTTTCTTTATAGTTATACCAATCATGATTGGTGGATTCGGAAACTGATTAGTACCACTTATATTAGGAGCCCCAGACATGGCATTCCCACGAATAAACAACATAAGATTTTGATTACTCCCACCGTCATTAACATTACTACTTACTAGCAGAACAGTAGAAAGTGGAGCAGGGACAGGATGAACAGTCTACCCCCCTCTTGCGAGAGGTATTGCCCATGCAGGAGCATCCGTAGACTTAGCCATCTTCTCCTTACATCTAGCAGGTGTTTCATCAATTTTGGGAGCAGTAAAT…	TTCTTCCACGATCATACATTAATAATTATATTAATAATCATCACAACCGTTATATACATGATAACCACCCTACTTTGAAATAAACATACTAGACGATTCATACTAGAAGGACAACTAATTGAAACTACATGAACAATTGCACCAGCAATTATCTTAGTATTCATTGCAATACCATCCTTACGACTTCTATATCTAATAGACGAAATCCACAACCCAACAATAACCCTAAAAGCAGTGGGACATCAATGATACTGAAGATATGAATATTCAGACTTCACAAAATTAGAATTTGACTCTTACATAATCCCACAAGAGGAAAATCAAGCAAGAACTTTCCGACTACTAGACACAGATAATCGAATTGTACTACCCATAAATTCACCAATCCGACTAGTAGTG…	ACATCACTTAGAATACTAATTCGAACAGAACTAGGGCAACCCGGATCTCTAATTGGAGATGACCAGATCTACAACGTTATCGTTACTGCTCATGCATTCGTCATAATTTTCTTTATAGTTATACCAATCATGATTGGTGGATTCGGAAACTGATTAGTACCACTTATATTAGGAGCCCCAGACATGGCATTCCCACGAATAAACAACATAAGATTTTGATTACTCCCACCGTCATTAACATTACTACTTACTAGCAGAACAGTAGAAAGTGGAGCAGGGACAGGATGAACAGTCTACCCCCCTCTTGCGAGAGGTATTGCCCATGCAGGAGCATCCGTAGACTTAGCCATCTTCTCCTTACATCTAGCAGGTGTTTCATCAATTTTGGGAGCAGTAAAT…	AGTGTCATCTTTAAGTCACAACAACCCATTATTTAACTGATTTCTTACTAAATTTTGTACGTTACTAGGGCTGTGACTGATTACTTTCACTGCAAACTGAAACTACAACCGTCTGTATGAGGAACAAGTTACATTTTTTCACTGCTTAAAACAACGGCAGCCGAAGGGACATATTTGCACCAGTTCCATCCAGTCCAAACACACACATAACGATTTTTCCAGACACATTTCAACGTTATTACGTGACCATC	AGTGTCATCTTTAAGTCACAACAACCCATTATTTAACTGATTTCTTACTAAATTTTGTACGTTACTAGGGCTGTGACTGATTACTTTCACTGCAAACTGAAACTACAACCGTCTGTATGAGGAACAAGTTACATTTTTTTACTGCTTAAAACAACGGCAGCCGACGGGACATATTTGCACCAGTTCCATCCAGTCCAAACACACACATAACGATTTTTCCAGACACATTTCAACGTTATTACGTGACCATC
R. flavipes	A87	27	59	RfA87_1	x	x	MK295280	-84.2476	35.3488	x	x	x	x	1,3	x	x	x	AGTGTCATCTTTAAGTCACAACAACCCATTATTTAACTGATTTCTTACTAAATTTTGTACGTTACTAGGGCTGTGACTGATTACTTTCACTGCAAACTGAAACTACAACCGTCTGTATGAGGAACAAGTTACATTTTTTCACTGCTTAAAACAACGGCAGCCGAAGGGACATATTTGCACCAGTTCCATCCAGTCCAAACACACACATAACGATTTATCCAGACACATATCAACGTTATTACGTGACCATC	AGTGTCATCTTTAAGTCACAACAACCCATTATTTAACTGATTTCTTACTAAATTTTGTACGTTACTAGGGCTGTGACTGATTACTTTCACTGCAAACTGAAACTACAACCGTCTGTATGAGGAACAAGTTACATTTTTTCACTGCTTAAAACAACGGCAGCCGACGGGACATATTTGCACCAGTTCCATCCAGTCCAAACACACACATAACGATTTTTCCAGACACATTTCAACGTTATTACGTGACCATC
R. flavipes	A87	27	60	RfA87_2	MK295410	MK295538	MK295281	-84.2476	35.3488	1	1	1	C	1,3	ACATCACTTAGAATACTAATTCGAACAGAACTAGGGCAACCCGGATCTCTAATTGGAGATGACCAGATCTACAACGTTATCGTTACTGCTCATGCATTCGTCATAATTTTCTTTATAGTCATACCAATCATGATTGGTGGATTCGGAAACTGATTAGTACCACTTATATTAGGAGCCCCAGACATGGCATTCCCACGAATAAACAACATAAGATTTTGATTACTCCCACCGTCATTAACATTACTACTTACTAGCAGAACAGTAGAAAGTGGAGCAGGGACAGGATGAACAGTCTACCCCCCTCTTGCGAGAGGTATTGCCCATGCAGGAGCATCCGTAGACTTAGCCATCTTCTCCTTACATCTAGCAGGTGTTTCATCAATTTTGGGAGCAGTAAAT…	TTCTTCCACGATCATACATTAATAATTATATTAATAATCATCACAACCGTTATATACATGATAACCACCCTACTTTGAAATAAACATACTAGACGATTCATACTAGAAGGACAACTAATTGAAACTACATGAACAATTGCACCAGCAATTATCTTAGTATTCATTGCAATACCATCCTTACGACTTCTATATCTAATAGACGAAATTCACAACCCAACAATAACCCTAAAAGCAGTGGGACATCAATGATACTGAAGATATGAATATTCAGACTTCACAAAATTAGAATTCGACTCTTACATAATCCCACAAGAGGAAAATCAAGCAAGAACTTTCCGACTACTAGACACAGATAATCGAATTGTACTACCCATAAATTCACCAATCCGACTAGTAGTG…	ACATCACTTAGAATACTAATTCGAACAGAACTAGGGCAACCCGGATCTCTAATTGGAGATGACCAGATCTACAACGTTATCGTTACTGCTCATGCATTCGTCATAATTTTCTTTATAGTCATACCAATCATGATTGGTGGATTCGGAAACTGATTAGTACCACTTATATTAGGAGCCCCAGACATGGCATTCCCACGAATAAACAACATAAGATTTTGATTACTCCCACCGTCATTAACATTACTACTTACTAGCAGAACAGTAGAAAGTGGAGCAGGGACAGGATGAACAGTCTACCCCCCTCTTGCGAGAGGTATTGCCCATGCAGGAGCATCCGTAGACTTAGCCATCTTCTCCTTACATCTAGCAGGTGTTTCATCAATTTTGGGAGCAGTAAAT…	AGTGTCATCTTTAAGTCACAACAACCCATTATTTAACTGATTTCTTACTAAATTTTGTACGTTACTAGGGCTGTGACTGATTACTTTCACTGCAAACTGAAACTACAACCGTCTGTATGAGGAACAAGTTACATTTTTTCACTGCTTAAAACAACGGCAGCCGAAGGGACATATTTGCACCAGTTCCATCCAGTCCAAACACACACATAACGATTTATCCAGACACATATCAACGTTATTACGTGACCATC	AGTGTCATCTTTAAGTCACAACAACCCATTATTTAACTGATTTCTTACTAAATTTTGTACGTTACTAGGGCTGTGACTGATTACTTTCACTGCAAACTGAAACTACAACCGTCTGTATGAGGAACAAGTTACATTTTTTCACTGCTTAAAACAACGGCAGCCGACGGGACATATTTGCACCAGTTCCATCCAGTCCAAACACACACATAACGATTTTTCCAGACACATTTCAACGTTATTACGTGACCATC
R. flavipes	A87	27	61	RfA87_3	MK295411	MK295539	MK295282	-84.2476	35.3488	1	1	1	C	1,3	ACATCACTTAGAATACTAATTCGAACAGAACTAGGGCAACCCGGATCTCTAATTGGAGATGACCAGATCTACAACGTTATCGTTACTGCTCATGCATTCGTCATAATTTTCTTTATAGTCATACCAATCATGATTGGTGGATTCGGAAACTGATTAGTACCACTTATATTAGGAGCCCCAGACATGGCATTCCCACGAATAAACAACATAAGATTTTGATTACTCCCACCGTCATTAACATTACTACTTACTAGCAGAACAGTAGAAAGTGGAGCAGGGACAGGATGAACAGTCTACCCCCCTCTTGCGAGAGGTATTGCCCATGCAGGAGCATCCGTAGACTTAGCCATCTTCTCCTTACATCTAGCAGGTGTTTCATCAATTTTGGGAGCAGTAAAT…	TTCTTCCACGATCATACATTAATAATTATATTAATAATCATCACAACCGTTATATACATGATAACCACCCTACTTTGAAATAAACATACTAGACGATTCATACTAGAAGGACAACTAATTGAAACTACATGAACAATTGCACCAGCAATTATCTTAGTATTCATTGCAATACCATCCTTACGACTTCTATATCTAATAGACGAAATTCACAACCCAACAATAACCCTAAAAGCAGTGGGACATCAATGATACTGAAGATATGAATATTCAGACTTCACAAAATTAGAATTCGACTCTTACATAATCCCACAAGAGGAAAATCAAGCAAGAACTTTCCGACTACTAGACACAGATAATCGAATTGTACTACCCATAAATTCACCAATCCGACTAGTAGTG…	ACATCACTTAGAATACTAATTCGAACAGAACTAGGGCAACCCGGATCTCTAATTGGAGATGACCAGATCTACAACGTTATCGTTACTGCTCATGCATTCGTCATAATTTTCTTTATAGTCATACCAATCATGATTGGTGGATTCGGAAACTGATTAGTACCACTTATATTAGGAGCCCCAGACATGGCATTCCCACGAATAAACAACATAAGATTTTGATTACTCCCACCGTCATTAACATTACTACTTACTAGCAGAACAGTAGAAAGTGGAGCAGGGACAGGATGAACAGTCTACCCCCCTCTTGCGAGAGGTATTGCCCATGCAGGAGCATCCGTAGACTTAGCCATCTTCTCCTTACATCTAGCAGGTGTTTCATCAATTTTGGGAGCAGTAAAT…	AGTGTCATCTTTAAGTCACAACAACCCATTATTTAACTGATTTCTTACTAAATTTTGTACGTTACTAGGGCTGTGACTGATTACTTTCACTGCAAACTGAAACTACAACCGTCTGTATGAGGAACAAGTTACATTTTTTCACTGCTTAAAACAACGGCAGCCGAAGGGACATATTTGCACCAGTTCCATCCAGTCCAAACACACACATAACGATTTATCCAGACACATATCAACGTTATTACGTGACCATC	AGTGTCATCTTTAAGTCACAACAACCCATTATTTAACTGATTTCTTACTAAATTTTGTACGTTACTAGGGCTGTGACTGATTACTTTCACTGCAAACTGAAACTACAACCGTCTGTATGAGGAACAAGTTACATTTTTTCACTGCTTAAAACAACGGCAGCCGACGGGACATATTTGCACCAGTTCCATCCAGTCCAAACACACACATAACGATTTTTCCAGACACATTTCAACGTTATTACGTGACCATC
R. flavipes	A88	28	62	RfA88_1	x	x	MK295283	-84.1938	35.3453	x	x	x	x	1,3	x	x	x	AGTGTCATCTTTAAGTCACAACAACCCATTATTTAACTGATTTCTTACTAAATTTTGTACGTTACTAGGGCTGTGACTGATTACTTTCACTGCAAACTGAAACTACAACCGTCTGTATGAGGAACAAGTTACATTTTTTCACTGCTTAAAACAACGGCAGCCGAAGGGACATATTTGCACCAGTTCCATCCAGTCCAAACACACACATAACGATTTATCCAGACACATATCAACGTTATTACGTGACCATC	AGTGTCATCTTTAAGTCACAACAACCCATTATTTAACTGATTTCTTACTAAATTTTGTACGTTACTAGGGCTGTGACTGATTACTTTCACTGCAAACTGAAACTACAACCGTCTGTATGAGGAACAAGTTACATTTTTTCACTGCTTAAAACAACGGCAGCCGACGGGACATATTTGCACCAGTTCCATCCAGTCCAAACACACACATAACGATTTTTCCAGACACATTTCAACGTTATTACGTGACCATC
R. flavipes	A88	28	63	RfA88_2	MK295412	MK295540	MK295284	-84.1938	35.3453	6	11	18	C	1,3	ACATCACTTAGAATACTAATTCGAACAGAACTAGGGCAACCCGGATCTCTAATTGGAGATGACCAGATCTACAACGTTATCGTTACTGCTCATGCATTCGTCATAATTTTCTTTATAGTAATACCAATCATGATTGGTGGATTCGGAAACTGATTAGTACCACTTATATTAGGAGCCCCAGACATGGCATTCCCACGAATAAACAACATAAGATTTTGATTACTCCCACCGTCATTAACATTACTACTTACTAGCAGAACAGTAGAAAGTGGAGCAGGGACAGGATGAACAGTCTACCCCCCTCTTGCGAGAGGTATTGCCCATGCAGGAGCATCCGTAGACTTAGCCATCTTCTCCTTACATCTAGCAGGTGTTTCATCAATTTTGGGAGCAGTAAAT…	TTCTTCCACGATCATACATTAATAATTATATTAATAATCATCACAACCGTTATATACATGATAACCACCCTACTTTGAAATAAACATACTAGACGATTCATACTAGAAGGACAACTAATTGAAACTACATGAACAATTGCACCAGCAATTATCTTAGTATTCATTGCAATACCATCCTTACGACTTCTATATCTAATAGACGAAATCCACAACCCAACAATAACCCTAAAAGCAGTGGGACATCAATGATACTGAAGATATGAATATTCAGACTTCACAAAATTAGAATTTGACTCTTACATAATCCCACAAGAGGAAAATCAAGCAAGAACTTTCCGACTACTAGACACAGATAATCGAATTGTACTACCCATAAATTCACCAATCCGACTAGTAGTG…	ACATCACTTAGAATACTAATTCGAACAGAACTAGGGCAACCCGGATCTCTAATTGGAGATGACCAGATCTACAACGTTATCGTTACTGCTCATGCATTCGTCATAATTTTCTTTATAGTAATACCAATCATGATTGGTGGATTCGGAAACTGATTAGTACCACTTATATTAGGAGCCCCAGACATGGCATTCCCACGAATAAACAACATAAGATTTTGATTACTCCCACCGTCATTAACATTACTACTTACTAGCAGAACAGTAGAAAGTGGAGCAGGGACAGGATGAACAGTCTACCCCCCTCTTGCGAGAGGTATTGCCCATGCAGGAGCATCCGTAGACTTAGCCATCTTCTCCTTACATCTAGCAGGTGTTTCATCAATTTTGGGAGCAGTAAAT…	AGTGTCATCTTTAAGTCACAACAACCCATTATTTAACTGATTTCTTACTAAATTTTGTACGTTACTAGGGCTGTGACTGATTACTTTCACTGCAAACTGAAACTACAACCGTCTGTATGAGGAACAAGTTACATTTTTTCACTGCTTAAAACAACGGCAGCCGAAGGGACATATTTGCACCAGTTCCATCCAGTCCAAACACACACATAACGATTTATCCAGACACATATCAACGTTATTACGTGACCATC	AGTGTCATCTTTAAGTCACAACAACCCATTATTTAACTGATTTCTTACTAAATTTTGTACGTTACTAGGGCTGTGACTGATTACTTTCACTGCAAACTGAAACTACAACCGTCTGTATGAGGAACAAGTTACATTTTTTCACTGCTTAAAACAACGGCAGCCGACGGGACATATTTGCACCAGTTCCATCCAGTCCAAACACACACATAACGATTTTTCCAGACACATTTCAACGTTATTACGTGACCATC
R. flavipes	A88	28	64	RfA88_3	MK295413	MK295541	MK295285	-84.1938	35.3453	6	11	18	C	1,3	ACATCACTTAGAATACTAATTCGAACAGAACTAGGGCAACCCGGATCTCTAATTGGAGATGACCAGATCTACAACGTTATCGTTACTGCTCATGCATTCGTCATAATTTTCTTTATAGTAATACCAATCATGATTGGTGGATTCGGAAACTGATTAGTACCACTTATATTAGGAGCCCCAGACATGGCATTCCCACGAATAAACAACATAAGATTTTGATTACTCCCACCGTCATTAACATTACTACTTACTAGCAGAACAGTAGAAAGTGGAGCAGGGACAGGATGAACAGTCTACCCCCCTCTTGCGAGAGGTATTGCCCATGCAGGAGCATCCGTAGACTTAGCCATCTTCTCCTTACATCTAGCAGGTGTTTCATCAATTTTGGGAGCAGTAAAT…	TTCTTCCACGATCATACATTAATAATTATATTAATAATCATCACAACCGTTATATACATGATAACCACCCTACTTTGAAATAAACATACTAGACGATTCATACTAGAAGGACAACTAATTGAAACTACATGAACAATTGCACCAGCAATTATCTTAGTATTCATTGCAATACCATCCTTACGACTTCTATATCTAATAGACGAAATCCACAACCCAACAATAACCCTAAAAGCAGTGGGACATCAATGATACTGAAGATATGAATATTCAGACTTCACAAAATTAGAATTTGACTCTTACATAATCCCACAAGAGGAAAATCAAGCAAGAACTTTCCGACTACTAGACACAGATAATCGAATTGTACTACCCATAAATTCACCAATCCGACTAGTAGTG…	ACATCACTTAGAATACTAATTCGAACAGAACTAGGGCAACCCGGATCTCTAATTGGAGATGACCAGATCTACAACGTTATCGTTACTGCTCATGCATTCGTCATAATTTTCTTTATAGTAATACCAATCATGATTGGTGGATTCGGAAACTGATTAGTACCACTTATATTAGGAGCCCCAGACATGGCATTCCCACGAATAAACAACATAAGATTTTGATTACTCCCACCGTCATTAACATTACTACTTACTAGCAGAACAGTAGAAAGTGGAGCAGGGACAGGATGAACAGTCTACCCCCCTCTTGCGAGAGGTATTGCCCATGCAGGAGCATCCGTAGACTTAGCCATCTTCTCCTTACATCTAGCAGGTGTTTCATCAATTTTGGGAGCAGTAAAT…	AGTGTCATCTTTAAGTCACAACAACCCATTATTTAACTGATTTCTTACTAAATTTTGTACGTTACTAGGGCTGTGACTGATTACTTTCACTGCAAACTGAAACTACAACCGTCTGTATGAGGAACAAGTTACATTTTTTCACTGCTTAAAACAACGGCAGCCGAAGGGACATATTTGCACCAGTTCCATCCAGTCCAAACACACACATAACGATTTATCCAGACACATATCAACGTTATTACGTGACCATC	AGTGTCATCTTTAAGTCACAACAACCCATTATTTAACTGATTTCTTACTAAATTTTGTACGTTACTAGGGCTGTGACTGATTACTTTCACTGCAAACTGAAACTACAACCGTCTGTATGAGGAACAAGTTACATTTTTTCACTGCTTAAAACAACGGCAGCCGACGGGACATATTTGCACCAGTTCCATCCAGTCCAAACACACACATAACGATTTTTCCAGACACATTTCAACGTTATTACGTGACCATC
R. flavipes	A92	29	65	RfA92b_1	MK295414	MK295542	MK295286	-83.5919	35.3297	16	5	19	C	1,3	ACATCACTTAGAATGCTAATTCGAACAGAACTAGGGCAACCCGGATCTCTAATTGGAGATGACCAGATCTACAACGTTATCGTTACTGCTCATGCATTCGTCATAATTTTCTTTATAGTCATACCAATCATGATTGGTGGATTCGGAAACTGATTAGTACCACTTATATTAGGAGCCCCAGACATGGCATTCCCACGAATAAACAACATAAGATTTTGATTACTCCCACCATCATTAACATTACTACTTACTAGCAGAACAGTAGAAAGTGGAGCAGGGACAGGATGAACAGTCTACCCCCCTCTTGCGAGAGGTATTGCCCATGCAGGAGCATCCGTAGACTTAGCCATCTTCTCCTTACATCTAGCAGGTGTTTCATCAATTTTGGGAGCAGTAAAT…	TTCTTCCACGATCATACATTAATAATTATATTAATAATCATCACAACCGTTATATACATGATAACCACCCTACTTTGAAATAAACATACTAGACGATTCATACTAGAAGGACAACTAATTGAAACTACATGAACAATTGCACCAGCAATTATCTTAGTATTCATTGCAATACCATCCTTACGACTTCTATATCTAATAGACGAAATCCACAACCCAACAATAACCCTAAAAGCAGTGGGACATCAATGATACTGAAGATATGAATATTCAGACTTCACAAAATTAGAATTCGACTCTTACATAATCCCACAAGAGGAAAATCAAGCAAGAACTTTCCGACTACTAGACACAGATAATCGAATTGTACTACCCATAAATTCACCAATCCGACTAGTAGTG…	ACATCACTTAGAATGCTAATTCGAACAGAACTAGGGCAACCCGGATCTCTAATTGGAGATGACCAGATCTACAACGTTATCGTTACTGCTCATGCATTCGTCATAATTTTCTTTATAGTCATACCAATCATGATTGGTGGATTCGGAAACTGATTAGTACCACTTATATTAGGAGCCCCAGACATGGCATTCCCACGAATAAACAACATAAGATTTTGATTACTCCCACCATCATTAACATTACTACTTACTAGCAGAACAGTAGAAAGTGGAGCAGGGACAGGATGAACAGTCTACCCCCCTCTTGCGAGAGGTATTGCCCATGCAGGAGCATCCGTAGACTTAGCCATCTTCTCCTTACATCTAGCAGGTGTTTCATCAATTTTGGGAGCAGTAAAT…	AGTGTCATCTTTAAGTCACAACAACCCATTATTTAACTGATTTCTTACTAAATTTTGTACGTTACTAGGGCTGTGACTGATTACTTTCACTGCAAACTGAAACTACAACCGTCTGTATGAGGAACAAGTTACATTTTTTCACTGCTTAAAACAACGGCAGCCGAAGGGACATATTTGCACCAGTTCCATCCAGTCCAAACACACACATAACGATTTATCCAGACACATATCAACGTTATTACGTGACCATC	AGTGTCATCTTTAAGTCACAACAACCCATTATTTAACTGATTTCTTACTAAATTTTGTACGTTACTAGGGCTGTGACTGATTACTTTCACTGCAAACTGAAACTACAACCGTCTGTATGAGGAACAAGTTACATTTTTTCACTGCTTAAAACAACGGCAGCCGACGGGACATATTTGCACCAGTTCCATCCAGTCCAAACACACACATAACGATTTTTCCAGACACATTTCAACGTTATTACGTGACCATC
R. flavipes	A92	29	66	RfA92b_2	MK295415	MK295543	MK295287	-83.5919	35.3297	16	5	19	C	1,3	ACATCACTTAGAATGCTAATTCGAACAGAACTAGGGCAACCCGGATCTCTAATTGGAGATGACCAGATCTACAACGTTATCGTTACTGCTCATGCATTCGTCATAATTTTCTTTATAGTCATACCAATCATGATTGGTGGATTCGGAAACTGATTAGTACCACTTATATTAGGAGCCCCAGACATGGCATTCCCACGAATAAACAACATAAGATTTTGATTACTCCCACCATCATTAACATTACTACTTACTAGCAGAACAGTAGAAAGTGGAGCAGGGACAGGATGAACAGTCTACCCCCCTCTTGCGAGAGGTATTGCCCATGCAGGAGCATCCGTAGACTTAGCCATCTTCTCCTTACATCTAGCAGGTGTTTCATCAATTTTGGGAGCAGTAAAT…	TTCTTCCACGATCATACATTAATAATTATATTAATAATCATCACAACCGTTATATACATGATAACCACCCTACTTTGAAATAAACATACTAGACGATTCATACTAGAAGGACAACTAATTGAAACTACATGAACAATTGCACCAGCAATTATCTTAGTATTCATTGCAATACCATCCTTACGACTTCTATATCTAATAGACGAAATCCACAACCCAACAATAACCCTAAAAGCAGTGGGACATCAATGATACTGAAGATATGAATATTCAGACTTCACAAAATTAGAATTCGACTCTTACATAATCCCACAAGAGGAAAATCAAGCAAGAACTTTCCGACTACTAGACACAGATAATCGAATTGTACTACCCATAAATTCACCAATCCGACTAGTAGTG…	ACATCACTTAGAATGCTAATTCGAACAGAACTAGGGCAACCCGGATCTCTAATTGGAGATGACCAGATCTACAACGTTATCGTTACTGCTCATGCATTCGTCATAATTTTCTTTATAGTCATACCAATCATGATTGGTGGATTCGGAAACTGATTAGTACCACTTATATTAGGAGCCCCAGACATGGCATTCCCACGAATAAACAACATAAGATTTTGATTACTCCCACCATCATTAACATTACTACTTACTAGCAGAACAGTAGAAAGTGGAGCAGGGACAGGATGAACAGTCTACCCCCCTCTTGCGAGAGGTATTGCCCATGCAGGAGCATCCGTAGACTTAGCCATCTTCTCCTTACATCTAGCAGGTGTTTCATCAATTTTGGGAGCAGTAAAT…	AGTGTCATCTTTAAGTCACAACAACCCATTATTTAACTGATTTCTTACTAAATTTTGTACGTTACTAGGGCTGTGACTGATTACTTTCACTGCAAACTGAAACTACAACCGTCTGTATGAGGAACAAGTTACATTTTTTCACTGCTTAAAACAACGGCAGCCGAAGGGACATATTTGCACCAGTTCCATCCAGTCCAAACACACACATAACGATTTATCCAGACACATATCAACGTTATTACGTGACCATC	AGTGTCATCTTTAAGTCACAACAACCCATTATTTAACTGATTTCTTACTAAATTTTGTACGTTACTAGGGCTGTGACTGATTACTTTCACTGCAAACTGAAACTACAACCGTCTGTATGAGGAACAAGTTACATTTTTTCACTGCTTAAAACAACGGCAGCCGACGGGACATATTTGCACCAGTTCCATCCAGTCCAAACACACACATAACGATTTTTCCAGACACATTTCAACGTTATTACGTGACCATC
R. flavipes	A92	29	67	RfA92b_3	MK295416	MK295544	MK295288	-83.5919	35.3297	16	5	19	C	1,3	ACATCACTTAGAATGCTAATTCGAACAGAACTAGGGCAACCCGGATCTCTAATTGGAGATGACCAGATCTACAACGTTATCGTTACTGCTCATGCATTCGTCATAATTTTCTTTATAGTCATACCAATCATGATTGGTGGATTCGGAAACTGATTAGTACCACTTATATTAGGAGCCCCAGACATGGCATTCCCACGAATAAACAACATAAGATTTTGATTACTCCCACCATCATTAACATTACTACTTACTAGCAGAACAGTAGAAAGTGGAGCAGGGACAGGATGAACAGTCTACCCCCCTCTTGCGAGAGGTATTGCCCATGCAGGAGCATCCGTAGACTTAGCCATCTTCTCCTTACATCTAGCAGGTGTTTCATCAATTTTGGGAGCAGTAAAT…	TTCTTCCACGATCATACATTAATAATTATATTAATAATCATCACAACCGTTATATACATGATAACCACCCTACTTTGAAATAAACATACTAGACGATTCATACTAGAAGGACAACTAATTGAAACTACATGAACAATTGCACCAGCAATTATCTTAGTATTCATTGCAATACCATCCTTACGACTTCTATATCTAATAGACGAAATCCACAACCCAACAATAACCCTAAAAGCAGTGGGACATCAATGATACTGAAGATATGAATATTCAGACTTCACAAAATTAGAATTCGACTCTTACATAATCCCACAAGAGGAAAATCAAGCAAGAACTTTCCGACTACTAGACACAGATAATCGAATTGTACTACCCATAAATTCACCAATCCGACTAGTAGTG…	ACATCACTTAGAATGCTAATTCGAACAGAACTAGGGCAACCCGGATCTCTAATTGGAGATGACCAGATCTACAACGTTATCGTTACTGCTCATGCATTCGTCATAATTTTCTTTATAGTCATACCAATCATGATTGGTGGATTCGGAAACTGATTAGTACCACTTATATTAGGAGCCCCAGACATGGCATTCCCACGAATAAACAACATAAGATTTTGATTACTCCCACCATCATTAACATTACTACTTACTAGCAGAACAGTAGAAAGTGGAGCAGGGACAGGATGAACAGTCTACCCCCCTCTTGCGAGAGGTATTGCCCATGCAGGAGCATCCGTAGACTTAGCCATCTTCTCCTTACATCTAGCAGGTGTTTCATCAATTTTGGGAGCAGTAAAT…	AGTGTCATCTTTAAGTCACAACAACCCATTATTTAACTGATTTCTTACTAAATTTTGTACGTTACTAGGGCTGTGACTGATTACTTTCACTGCAAACTGAAACTACAACCGTCTGTATGAGGAACAAGTTACATTTTTTCACTGCTTAAAACAACGGCAGCCGAAGGGACATATTTGCACCAGTTCCATCCAGTCCAAACACACACATAACGATTTATCCAGACACATATCAACGTTATTACGTGACCATC	AGTGTCATCTTTAAGTCACAACAACCCATTATTTAACTGATTTCTTACTAAATTTTGTACGTTACTAGGGCTGTGACTGATTACTTTCACTGCAAACTGAAACTACAACCGTCTGTATGAGGAACAAGTTACATTTTTTCACTGCTTAAAACAACGGCAGCCGACGGGACATATTTGCACCAGTTCCATCCAGTCCAAACACACACATAACGATTTTTCCAGACACATTTCAACGTTATTACGTGACCATC
R. flavipes	A97	30	68	RfA97_1	MK295417	MK295545	MK295289	-82.4874	35.5954	1	12	20	C	1,3	ACATCACTTAGAATACTAATTCGAACAGAACTAGGGCAACCCGGATCTCTAATTGGAGATGACCAGATCTACAACGTTATCGTTACTGCTCATGCATTCGTCATAATTTTCTTTATAGTCATACCAATCATGATTGGTGGATTCGGAAACTGATTAGTACCACTTATATTAGGAGCCCCAGACATGGCATTCCCACGAATAAACAACATAAGATTTTGATTACTCCCACCGTCATTAACATTACTACTTACTAGCAGAACAGTAGAAAGTGGAGCAGGGACAGGATGAACAGTCTACCCCCCTCTTGCGAGAGGTATTGCCCATGCAGGAGCATCCGTAGACTTAGCCATCTTCTCCTTACATCTAGCAGGTGTTTCATCAATTTTGGGAGCAGTAAAT…	TTCTTCCACGATCATACATTAATAATTATATTAATAATCATCACAACCGTTATATACATGATAACCACCCTACTTTGAAATAAACATACTAGACGATTCATACTAGAAGGACAACTAATTGAAACTACATGAACAATTGCACCAGCAATTATCTTAGTATTCATTGCAATACCATCCTTACGACTTCTATATCTAATAGACGAAATCCACAACCCAACAATAACCCTAAAAGCAGTGGGACATCAATGATACTGAAGATATGAATATTCAGACTTCACAAAATTAGAATTCGACTCTTACATAATCCCACAAGAGGAAAATCAAGCAAGAACCTTCCGACTACTAGACACAGATAATCGAATTGTACTACCCATAAATTCACCAATCCGACTAGTAGTG…	ACATCACTTAGAATACTAATTCGAACAGAACTAGGGCAACCCGGATCTCTAATTGGAGATGACCAGATCTACAACGTTATCGTTACTGCTCATGCATTCGTCATAATTTTCTTTATAGTCATACCAATCATGATTGGTGGATTCGGAAACTGATTAGTACCACTTATATTAGGAGCCCCAGACATGGCATTCCCACGAATAAACAACATAAGATTTTGATTACTCCCACCGTCATTAACATTACTACTTACTAGCAGAACAGTAGAAAGTGGAGCAGGGACAGGATGAACAGTCTACCCCCCTCTTGCGAGAGGTATTGCCCATGCAGGAGCATCCGTAGACTTAGCCATCTTCTCCTTACATCTAGCAGGTGTTTCATCAATTTTGGGAGCAGTAAAT…	AGTGTCATCTTTAAGTCACAACAACCCATTATTTAACTGATTTCTTACTAAATTTTGTACGTTACTAGGGCTGTGACTGATTACTTTCACTGCAAACTGAAACTACAACCGTCTGTATGAGGAACAAGTTACATTTTTTCACTGCTTAAAACAACGGCAGCCGAAGGGACATATTTGCACCAGTTCCATCCAGTCCAAACACACACATAACGATTTATCCAGACACATATCAACGTTATTACGTGACCATC	AGTGTCATCTTTAAGTCACAACAACCCATTATTTAACTGATTTCTTACTAAATTTTGTACGTTACTAGGGCTGTGACTGATTACTTTCACTGCAAACTGAAACTACAACCGTCTGTATGAGGAACAAGTTACATTTTTTCACTGCTTAAAACAACGGCAGCCGACGGGACATATTTGCACCAGTTCCATCCAGTCCAAACACACACATAACGATTTTTCCAGACACATTTCAACGTTATTACGTGACCATC
R. flavipes	A97	30	69	RfA97_2	MK295418	MK295546	MK295290	-82.4874	35.5954	1	12	20	C	1,3	ACATCACTTAGAATACTAATTCGAACAGAACTAGGGCAACCCGGATCTCTAATTGGAGATGACCAGATCTACAACGTTATCGTTACTGCTCATGCATTCGTCATAATTTTCTTTATAGTCATACCAATCATGATTGGTGGATTCGGAAACTGATTAGTACCACTTATATTAGGAGCCCCAGACATGGCATTCCCACGAATAAACAACATAAGATTTTGATTACTCCCACCGTCATTAACATTACTACTTACTAGCAGAACAGTAGAAAGTGGAGCAGGGACAGGATGAACAGTCTACCCCCCTCTTGCGAGAGGTATTGCCCATGCAGGAGCATCCGTAGACTTAGCCATCTTCTCCTTACATCTAGCAGGTGTTTCATCAATTTTGGGAGCAGTAAAT…	TTCTTCCACGATCATACATTAATAATTATATTAATAATCATCACAACCGTTATATACATGATAACCACCCTACTTTGAAATAAACATACTAGACGATTCATACTAGAAGGACAACTAATTGAAACTACATGAACAATTGCACCAGCAATTATCTTAGTATTCATTGCAATACCATCCTTACGACTTCTATATCTAATAGACGAAATCCACAACCCAACAATAACCCTAAAAGCAGTGGGACATCAATGATACTGAAGATATGAATATTCAGACTTCACAAAATTAGAATTCGACTCTTACATAATCCCACAAGAGGAAAATCAAGCAAGAACCTTCCGACTACTAGACACAGATAATCGAATTGTACTACCCATAAATTCACCAATCCGACTAGTAGTG…	ACATCACTTAGAATACTAATTCGAACAGAACTAGGGCAACCCGGATCTCTAATTGGAGATGACCAGATCTACAACGTTATCGTTACTGCTCATGCATTCGTCATAATTTTCTTTATAGTCATACCAATCATGATTGGTGGATTCGGAAACTGATTAGTACCACTTATATTAGGAGCCCCAGACATGGCATTCCCACGAATAAACAACATAAGATTTTGATTACTCCCACCGTCATTAACATTACTACTTACTAGCAGAACAGTAGAAAGTGGAGCAGGGACAGGATGAACAGTCTACCCCCCTCTTGCGAGAGGTATTGCCCATGCAGGAGCATCCGTAGACTTAGCCATCTTCTCCTTACATCTAGCAGGTGTTTCATCAATTTTGGGAGCAGTAAAT…	AGTGTCATCTTTAAGTCACAACAACCCATTATTTAACTGATTTCTTACTAAATTTTGTACGTTACTAGGGCTGTGACTGATTACTTTCACTGCAAACTGAAACTACAACCGTCTGTATGAGGAACAAGTTACATTTTTTCACTGCTTAAAACAACGGCAGCCGAAGGGACATATTTGCACCAGTTCCATCCAGTCCAAACACACACATAACGATTTATCCAGACACATATCAACGTTATTACGTGACCATC	AGTGTCATCTTTAAGTCACAACAACCCATTATTTAACTGATTTCTTACTAAATTTTGTACGTTACTAGGGCTGTGACTGATTACTTTCACTGCAAACTGAAACTACAACCGTCTGTATGAGGAACAAGTTACATTTTTTCACTGCTTAAAACAACGGCAGCCGACGGGACATATTTGCACCAGTTCCATCCAGTCCAAACACACACATAACGATTTTTCCAGACACATTTCAACGTTATTACGTGACCATC
R. flavipes	A97	30	70	RfA97_3	MK295419	MK295547	MK295291	-82.4874	35.5954	1	12	20	C	1,3	ACATCACTTAGAATACTAATTCGAACAGAACTAGGGCAACCCGGATCTCTAATTGGAGATGACCAGATCTACAACGTTATCGTTACTGCTCATGCATTCGTCATAATTTTCTTTATAGTCATACCAATCATGATTGGTGGATTCGGAAACTGATTAGTACCACTTATATTAGGAGCCCCAGACATGGCATTCCCACGAATAAACAACATAAGATTTTGATTACTCCCACCGTCATTAACATTACTACTTACTAGCAGAACAGTAGAAAGTGGAGCAGGGACAGGATGAACAGTCTACCCCCCTCTTGCGAGAGGTATTGCCCATGCAGGAGCATCCGTAGACTTAGCCATCTTCTCCTTACATCTAGCAGGTGTTTCATCAATTTTGGGAGCAGTAAAT…	TTCTTCCACGATCATACATTAATAATTATATTAATAATCATCACAACCGTTATATACATGATAACCACCCTACTTTGAAATAAACATACTAGACGATTCATACTAGAAGGACAACTAATTGAAACTACATGAACAATTGCACCAGCAATTATCTTAGTATTCATTGCAATACCATCCTTACGACTTCTATATCTAATAGACGAAATCCACAACCCAACAATAACCCTAAAAGCAGTGGGACATCAATGATACTGAAGATATGAATATTCAGACTTCACAAAATTAGAATTCGACTCTTACATAATCCCACAAGAGGAAAATCAAGCAAGAACCTTCCGACTACTAGACACAGATAATCGAATTGTACTACCCATAAATTCACCAATCCGACTAGTAGTG…	ACATCACTTAGAATACTAATTCGAACAGAACTAGGGCAACCCGGATCTCTAATTGGAGATGACCAGATCTACAACGTTATCGTTACTGCTCATGCATTCGTCATAATTTTCTTTATAGTCATACCAATCATGATTGGTGGATTCGGAAACTGATTAGTACCACTTATATTAGGAGCCCCAGACATGGCATTCCCACGAATAAACAACATAAGATTTTGATTACTCCCACCGTCATTAACATTACTACTTACTAGCAGAACAGTAGAAAGTGGAGCAGGGACAGGATGAACAGTCTACCCCCCTCTTGCGAGAGGTATTGCCCATGCAGGAGCATCCGTAGACTTAGCCATCTTCTCCTTACATCTAGCAGGTGTTTCATCAATTTTGGGAGCAGTAAAT…	AGTGTCATCTTTAAGTCACAACAACCCATTATTTAACTGATTTCTTACTAAATTTTGTACGTTACTAGGGCTGTGACTGATTACTTTCACTGCAAACTGAAACTACAACCGTCTGTATGAGGAACAAGTTACATTTTTTCACTGCTTAAAACAACGGCAGCCGAAGGGACATATTTGCACCAGTTCCATCCAGTCCAAACACACACATAACGATTTATCCAGACACATATCAACGTTATTACGTGACCATC	AGTGTCATCTTTAAGTCACAACAACCCATTATTTAACTGATTTCTTACTAAATTTTGTACGTTACTAGGGCTGTGACTGATTACTTTCACTGCAAACTGAAACTACAACCGTCTGTATGAGGAACAAGTTACATTTTTTCACTGCTTAAAACAACGGCAGCCGACGGGACATATTTGCACCAGTTCCATCCAGTCCAAACACACACATAACGATTTTTCCAGACACATTTCAACGTTATTACGTGACCATC
R. flavipes	A106	31	71	RfA106_1	x	x	MK295292	-79.3862	38.8237	x	x	x	x	1,2	x	x	x	AGTGTCATCTTTAAGTCACAACAACCCATTATTTAACTGATTTCTTACTAAATTTTGTACGTTACTAGGGCTGTGACTGATTACTTTCACTGCAAACTGAAACTACAACCGTCTGTATGAGGAACAAGTTACATTTTTTCACTGCTTAAAACAACGGCAGCCGAAGGGACATATTTGCACCAGTTCCATCCAGTCCAAACACACACATAACGATTTATCCAGACACATATCAACGTTATTACGTGACCATC	AGTGTCATCTTTAAGTCACAACAACCCATTATTTAACTGATTTCTTACTAAATTTTGTACGTTACTAGGGCTGTGACTGATTACTTTCACTGCAAACTGAAACTACAACCGTCTGTATGAGGAACAAGTTACATTTTTTCACTGCTTAAAACAACGGCAGCCGAAGGGACATATTTGCACCAGTTCCATCCAGTCCAAACACACACATAACGATTTTTCCAGACACATTTCAACGTTATTACGTGACCATC
R. flavipes	A106	31	72	RfA106_2	MK295420	MK295548	MK295293	-79.3862	38.8237	17	13	21	N	1,2	ACATCACTTAGAATACTAATTCGAACAGAACTAGGGCAACCCGGATCTCTAATTGGAGATGACCAGATCTACAACGTTATCGTTACTGCTCATGCATTCGTCATAATTTTCTTTATGGTCATACCAATCATGATTGGTGGATTCGGAAACTGACTAGTACCACTTATATTAGGAGCCCCAGACATGGCATTCCCACGAATAAACAACATAAGATTTTGATTACTCCCACCGTCATTAACATTACTACTTACTAGCAGAACAGTAGAAAGTGGAGCAGGGACAGGATGAACAGTTTACCCCCCTCTTGCGAGAGGTATTGCCCATGCAGGAGCATCCGTAGACTTAGCCATCTTCTCCTTACATCTAGCAGGTGTTTCATCAATTTTGGGAGCAGTAAAT…	TTCTTCCACGATCATACATTAATAATTATATTAATAATCATCACAACCGTTATATACATGATAACCACCCTACTTTGAAATAAACATACTAGACGATTCATACTAGAAGGACAACTAATTGAAACTACATGAACAATTGCACCAGCAATTATCTTAGTATTCATTGCAATACCATCCTTACGACTCCTATATCTAATAGACGAAATCCACAACCCAACAATAACCCTAAAAGCAGTAGGACATCAATGATACTGAAGATATGAATATTCAGACTTCACAAAATTAGAATTCGACTCTTACATAATCCCACAAGAGGAAAATCAAGCAAGAACTTTCCGACTACTAGACACAGATAATCGAATTGTACTACCCATAAATTCACCAATCCGACTAGTAGTG…	ACATCACTTAGAATACTAATTCGAACAGAACTAGGGCAACCCGGATCTCTAATTGGAGATGACCAGATCTACAACGTTATCGTTACTGCTCATGCATTCGTCATAATTTTCTTTATGGTCATACCAATCATGATTGGTGGATTCGGAAACTGACTAGTACCACTTATATTAGGAGCCCCAGACATGGCATTCCCACGAATAAACAACATAAGATTTTGATTACTCCCACCGTCATTAACATTACTACTTACTAGCAGAACAGTAGAAAGTGGAGCAGGGACAGGATGAACAGTTTACCCCCCTCTTGCGAGAGGTATTGCCCATGCAGGAGCATCCGTAGACTTAGCCATCTTCTCCTTACATCTAGCAGGTGTTTCATCAATTTTGGGAGCAGTAAAT…	AGTGTCATCTTTAAGTCACAACAACCCATTATTTAACTGATTTCTTACTAAATTTTGTACGTTACTAGGGCTGTGACTGATTACTTTCACTGCAAACTGAAACTACAACCGTCTGTATGAGGAACAAGTTACATTTTTTCACTGCTTAAAACAACGGCAGCCGAAGGGACATATTTGCACCAGTTCCATCCAGTCCAAACACACACATAACGATTTATCCAGACACATATCAACGTTATTACGTGACCATC	AGTGTCATCTTTAAGTCACAACAACCCATTATTTAACTGATTTCTTACTAAATTTTGTACGTTACTAGGGCTGTGACTGATTACTTTCACTGCAAACTGAAACTACAACCGTCTGTATGAGGAACAAGTTACATTTTTTCACTGCTTAAAACAACGGCAGCCGAAGGGACATATTTGCACCAGTTCCATCCAGTCCAAACACACACATAACGATTTTTCCAGACACATTTCAACGTTATTACGTGACCATC
R. flavipes	A106	31	73	RfA106_3	MK295421	MK295549	MK295294	-79.3862	38.8237	17	13	21	N	1,2	ACATCACTTAGAATACTAATTCGAACAGAACTAGGGCAACCCGGATCTCTAATTGGAGATGACCAGATCTACAACGTTATCGTTACTGCTCATGCATTCGTCATAATTTTCTTTATGGTCATACCAATCATGATTGGTGGATTCGGAAACTGACTAGTACCACTTATATTAGGAGCCCCAGACATGGCATTCCCACGAATAAACAACATAAGATTTTGATTACTCCCACCGTCATTAACATTACTACTTACTAGCAGAACAGTAGAAAGTGGAGCAGGGACAGGATGAACAGTTTACCCCCCTCTTGCGAGAGGTATTGCCCATGCAGGAGCATCCGTAGACTTAGCCATCTTCTCCTTACATCTAGCAGGTGTTTCATCAATTTTGGGAGCAGTAAAT…	TTCTTCCACGATCATACATTAATAATTATATTAATAATCATCACAACCGTTATATACATGATAACCACCCTACTTTGAAATAAACATACTAGACGATTCATACTAGAAGGACAACTAATTGAAACTACATGAACAATTGCACCAGCAATTATCTTAGTATTCATTGCAATACCATCCTTACGACTCCTATATCTAATAGACGAAATCCACAACCCAACAATAACCCTAAAAGCAGTAGGACATCAATGATACTGAAGATATGAATATTCAGACTTCACAAAATTAGAATTCGACTCTTACATAATCCCACAAGAGGAAAATCAAGCAAGAACTTTCCGACTACTAGACACAGATAATCGAATTGTACTACCCATAAATTCACCAATCCGACTAGTAGTG…	ACATCACTTAGAATACTAATTCGAACAGAACTAGGGCAACCCGGATCTCTAATTGGAGATGACCAGATCTACAACGTTATCGTTACTGCTCATGCATTCGTCATAATTTTCTTTATGGTCATACCAATCATGATTGGTGGATTCGGAAACTGACTAGTACCACTTATATTAGGAGCCCCAGACATGGCATTCCCACGAATAAACAACATAAGATTTTGATTACTCCCACCGTCATTAACATTACTACTTACTAGCAGAACAGTAGAAAGTGGAGCAGGGACAGGATGAACAGTTTACCCCCCTCTTGCGAGAGGTATTGCCCATGCAGGAGCATCCGTAGACTTAGCCATCTTCTCCTTACATCTAGCAGGTGTTTCATCAATTTTGGGAGCAGTAAAT…	AGTGTCATCTTTAAGTCACAACAACCCATTATTTAACTGATTTCTTACTAAATTTTGTACGTTACTAGGGCTGTGACTGATTACTTTCACTGCAAACTGAAACTACAACCGTCTGTATGAGGAACAAGTTACATTTTTTCACTGCTTAAAACAACGGCAGCCGAAGGGACATATTTGCACCAGTTCCATCCAGTCCAAACACACACATAACGATTTATCCAGACACATATCAACGTTATTACGTGACCATC	AGTGTCATCTTTAAGTCACAACAACCCATTATTTAACTGATTTCTTACTAAATTTTGTACGTTACTAGGGCTGTGACTGATTACTTTCACTGCAAACTGAAACTACAACCGTCTGTATGAGGAACAAGTTACATTTTTTCACTGCTTAAAACAACGGCAGCCGAAGGGACATATTTGCACCAGTTCCATCCAGTCCAAACACACACATAACGATTTTTCCAGACACATTTCAACGTTATTACGTGACCATC
R. flavipes	A106	32	74	RfA106b_1	MK295422	MK295550	MK295295	-79.3862	38.8237	17	13	21	N	1,2	ACATCACTTAGAATACTAATTCGAACAGAACTAGGGCAACCCGGATCTCTAATTGGAGATGACCAGATCTACAACGTTATCGTTACTGCTCATGCATTCGTCATAATTTTCTTTATGGTCATACCAATCATGATTGGTGGATTCGGAAACTGACTAGTACCACTTATATTAGGAGCCCCAGACATGGCATTCCCACGAATAAACAACATAAGATTTTGATTACTCCCACCGTCATTAACATTACTACTTACTAGCAGAACAGTAGAAAGTGGAGCAGGGACAGGATGAACAGTTTACCCCCCTCTTGCGAGAGGTATTGCCCATGCAGGAGCATCCGTAGACTTAGCCATCTTCTCCTTACATCTAGCAGGTGTTTCATCAATTTTGGGAGCAGTAAAT…	TTCTTCCACGATCATACATTAATAATTATATTAATAATCATCACAACCGTTATATACATGATAACCACCCTACTTTGAAATAAACATACTAGACGATTCATACTAGAAGGACAACTAATTGAAACTACATGAACAATTGCACCAGCAATTATCTTAGTATTCATTGCAATACCATCCTTACGACTCCTATATCTAATAGACGAAATCCACAACCCAACAATAACCCTAAAAGCAGTAGGACATCAATGATACTGAAGATATGAATATTCAGACTTCACAAAATTAGAATTCGACTCTTACATAATCCCACAAGAGGAAAATCAAGCAAGAACTTTCCGACTACTAGACACAGATAATCGAATTGTACTACCCATAAATTCACCAATCCGACTAGTAGTG…	ACATCACTTAGAATACTAATTCGAACAGAACTAGGGCAACCCGGATCTCTAATTGGAGATGACCAGATCTACAACGTTATCGTTACTGCTCATGCATTCGTCATAATTTTCTTTATGGTCATACCAATCATGATTGGTGGATTCGGAAACTGACTAGTACCACTTATATTAGGAGCCCCAGACATGGCATTCCCACGAATAAACAACATAAGATTTTGATTACTCCCACCGTCATTAACATTACTACTTACTAGCAGAACAGTAGAAAGTGGAGCAGGGACAGGATGAACAGTTTACCCCCCTCTTGCGAGAGGTATTGCCCATGCAGGAGCATCCGTAGACTTAGCCATCTTCTCCTTACATCTAGCAGGTGTTTCATCAATTTTGGGAGCAGTAAAT…	AGTGTCATCTTTAAGTCACAACAACCCATTATTTAACTGATTTCTTACTAAATTTTGTACGTTACTAGGGCTGTGACTGATTACTTTCACTGCAAACTGAAACTACAACCGTCTGTATGAGGAACAAGTTACATTTTTTCACTGCTTAAAACAACGGCAGCCGAAGGGACATATTTGCACCAGTTCCATCCAGTCCAAACACACACATAACGATTTATCCAGACACATATCAACGTTATTACGTGACCATC	AGTGTCATCTTTAAGTCACAACAACCCATTATTTAACTGATTTCTTACTAAATTTTGTACGTTACTAGGGCTGTGACTGATTACTTTCACTGCAAACTGAAACTACAACCGTCTGTATGAGGAACAAGTTACATTTTTTCACTGCTTAAAACAACGGCAGCCGAAGGGACATATTTGCACCAGTTCCATCCAGTCCAAACACACACATAACGATTTTTCCAGACACATTTCAACGTTATTACGTGACCATC
R. flavipes	A106	32	75	RfA106b_2	MK295423	MK295551	MK295296	-79.3862	38.8237	17	13	21	N	1,2	ACATCACTTAGAATACTAATTCGAACAGAACTAGGGCAACCCGGATCTCTAATTGGAGATGACCAGATCTACAACGTTATCGTTACTGCTCATGCATTCGTCATAATTTTCTTTATGGTCATACCAATCATGATTGGTGGATTCGGAAACTGACTAGTACCACTTATATTAGGAGCCCCAGACATGGCATTCCCACGAATAAACAACATAAGATTTTGATTACTCCCACCGTCATTAACATTACTACTTACTAGCAGAACAGTAGAAAGTGGAGCAGGGACAGGATGAACAGTTTACCCCCCTCTTGCGAGAGGTATTGCCCATGCAGGAGCATCCGTAGACTTAGCCATCTTCTCCTTACATCTAGCAGGTGTTTCATCAATTTTGGGAGCAGTAAAT…	TTCTTCCACGATCATACATTAATAATTATATTAATAATCATCACAACCGTTATATACATGATAACCACCCTACTTTGAAATAAACATACTAGACGATTCATACTAGAAGGACAACTAATTGAAACTACATGAACAATTGCACCAGCAATTATCTTAGTATTCATTGCAATACCATCCTTACGACTCCTATATCTAATAGACGAAATCCACAACCCAACAATAACCCTAAAAGCAGTAGGACATCAATGATACTGAAGATATGAATATTCAGACTTCACAAAATTAGAATTCGACTCTTACATAATCCCACAAGAGGAAAATCAAGCAAGAACTTTCCGACTACTAGACACAGATAATCGAATTGTACTACCCATAAATTCACCAATCCGACTAGTAGTG…	ACATCACTTAGAATACTAATTCGAACAGAACTAGGGCAACCCGGATCTCTAATTGGAGATGACCAGATCTACAACGTTATCGTTACTGCTCATGCATTCGTCATAATTTTCTTTATGGTCATACCAATCATGATTGGTGGATTCGGAAACTGACTAGTACCACTTATATTAGGAGCCCCAGACATGGCATTCCCACGAATAAACAACATAAGATTTTGATTACTCCCACCGTCATTAACATTACTACTTACTAGCAGAACAGTAGAAAGTGGAGCAGGGACAGGATGAACAGTTTACCCCCCTCTTGCGAGAGGTATTGCCCATGCAGGAGCATCCGTAGACTTAGCCATCTTCTCCTTACATCTAGCAGGTGTTTCATCAATTTTGGGAGCAGTAAAT…	AGTGTCATCTTTAAGTCACAACAACCCATTATTTAACTGATTTCTTACTAAATTTTGTACGTTACTAGGGCTGTGACTGATTACTTTCACTGCAAACTGAAACTACAACCGTCTGTATGAGGAACAAGTTACATTTTTTCACTGCTTAAAACAACGGCAGCCGAAGGGACATATTTGCACCAGTTCCATCCAGTCCAAACACACACATAACGATTTATCCAGACACATATCAACGTTATTACGTGACCATC	AGTGTCATCTTTAAGTCACAACAACCCATTATTTAACTGATTTCTTACTAAATTTTGTACGTTACTAGGGCTGTGACTGATTACTTTCACTGCAAACTGAAACTACAACCGTCTGTATGAGGAACAAGTTACATTTTTTCACTGCTTAAAACAACGGCAGCCGAAGGGACATATTTGCACCAGTTCCATCCAGTCCAAACACACACATAACGATTTTTCCAGACACATTTCAACGTTATTACGTGACCATC
R. flavipes	A106	32	76	RfA106b_3	MK295424	MK295552	MK295297	-79.3862	38.8237	17	13	21	N	1,2	ACATCACTTAGAATACTAATTCGAACAGAACTAGGGCAACCCGGATCTCTAATTGGAGATGACCAGATCTACAACGTTATCGTTACTGCTCATGCATTCGTCATAATTTTCTTTATGGTCATACCAATCATGATTGGTGGATTCGGAAACTGACTAGTACCACTTATATTAGGAGCCCCAGACATGGCATTCCCACGAATAAACAACATAAGATTTTGATTACTCCCACCGTCATTAACATTACTACTTACTAGCAGAACAGTAGAAAGTGGAGCAGGGACAGGATGAACAGTTTACCCCCCTCTTGCGAGAGGTATTGCCCATGCAGGAGCATCCGTAGACTTAGCCATCTTCTCCTTACATCTAGCAGGTGTTTCATCAATTTTGGGAGCAGTAAAT…	TTCTTCCACGATCATACATTAATAATTATATTAATAATCATCACAACCGTTATATACATGATAACCACCCTACTTTGAAATAAACATACTAGACGATTCATACTAGAAGGACAACTAATTGAAACTACATGAACAATTGCACCAGCAATTATCTTAGTATTCATTGCAATACCATCCTTACGACTCCTATATCTAATAGACGAAATCCACAACCCAACAATAACCCTAAAAGCAGTAGGACATCAATGATACTGAAGATATGAATATTCAGACTTCACAAAATTAGAATTCGACTCTTACATAATCCCACAAGAGGAAAATCAAGCAAGAACTTTCCGACTACTAGACACAGATAATCGAATTGTACTACCCATAAATTCACCAATCCGACTAGTAGTG…	ACATCACTTAGAATACTAATTCGAACAGAACTAGGGCAACCCGGATCTCTAATTGGAGATGACCAGATCTACAACGTTATCGTTACTGCTCATGCATTCGTCATAATTTTCTTTATGGTCATACCAATCATGATTGGTGGATTCGGAAACTGACTAGTACCACTTATATTAGGAGCCCCAGACATGGCATTCCCACGAATAAACAACATAAGATTTTGATTACTCCCACCGTCATTAACATTACTACTTACTAGCAGAACAGTAGAAAGTGGAGCAGGGACAGGATGAACAGTTTACCCCCCTCTTGCGAGAGGTATTGCCCATGCAGGAGCATCCGTAGACTTAGCCATCTTCTCCTTACATCTAGCAGGTGTTTCATCAATTTTGGGAGCAGTAAAT…	AGTGTCATCTTTAAGTCACAACAACCCATTATTTAACTGATTTCTTACTAAATTTTGTACGTTACTAGGGCTGTGACTGATTACTTTCACTGCAAACTGAAACTACAACCGTCTGTATGAGGAACAAGTTACATTTTTTCACTGCTTAAAACAACGGCAGCCGAAGGGACATATTTGCACCAGTTCCATCCAGTCCAAACACACACATAACGATTTATCCAGACACATATCAACGTTATTACGTGACCATC	AGTGTCATCTTTAAGTCACAACAACCCATTATTTAACTGATTTCTTACTAAATTTTGTACGTTACTAGGGCTGTGACTGATTACTTTCACTGCAAACTGAAACTACAACCGTCTGTATGAGGAACAAGTTACATTTTTTCACTGCTTAAAACAACGGCAGCCGAAGGGACATATTTGCACCAGTTCCATCCAGTCCAAACACACACATAACGATTTTTCCAGACACATTTCAACGTTATTACGTGACCATC
R. flavipes	A107	33	77	RfA107_1	MK295425	MK295553	MK295298	-79.3851	38.8259	18	7	22	N	1,2	ACATCACTTAGTATACTAATTCGAACAGAACTAGGGCAACCCGGATCTCTAATTGGAGATGACCAGATCTACAACGTTATCGTTACTGCTCATGCATTCGTCATAATTTTCTTTATGGTCATACCAATCATGATTGGTGGATTTGGAAACTGACTAGTACCACTTATATTAGGAGCCCCAGACATGGCATTCCCACGAATAAACAACATAAGATTTTGATTACTCCCACCATCATTAACATTACTACTTACTAGCAGAACAGTAGAAAGTGGAGCAGGGACAGGATGAACAGTTTACCCCCCTCTTGCGAGAGGTATTGCCCATGCAGGAGCATCCGTAGACTTAGCCATCTTCTCCTTACATCTAGCAGGTGTTTCATCAATTTTGGGAGCAGTAAAT…	TTCTTCCACGATCATACATTAATAATTATATTAATAATCATCACAACCGTTATATACATAATAACCACCCTACTTTGAAATAAACATACTAGACGATTCATACTAGAAGGACAACTAATTGAAACTACATGAACAATTGCACCAGCAATTATCTTAGTATTCATTGCAATACCATCCTTACGACTCCTATATCTAATAGACGAAATCCACAACCCAACAATAACCCTAAAAGCAGTAGGACATCAATGATACTGAAGATATGAATATTCAGACTTCACAAAATTAGAATTCGACTCTTACATAATCCCACAAGAGGAAAATCAAGCAAGAACTTTCCGACTACTAGACACAGATAATCGAATTGTACTACCCATAAATTCACCAATCCGACTAGTAGTG…	ACATCACTTAGTATACTAATTCGAACAGAACTAGGGCAACCCGGATCTCTAATTGGAGATGACCAGATCTACAACGTTATCGTTACTGCTCATGCATTCGTCATAATTTTCTTTATGGTCATACCAATCATGATTGGTGGATTTGGAAACTGACTAGTACCACTTATATTAGGAGCCCCAGACATGGCATTCCCACGAATAAACAACATAAGATTTTGATTACTCCCACCATCATTAACATTACTACTTACTAGCAGAACAGTAGAAAGTGGAGCAGGGACAGGATGAACAGTTTACCCCCCTCTTGCGAGAGGTATTGCCCATGCAGGAGCATCCGTAGACTTAGCCATCTTCTCCTTACATCTAGCAGGTGTTTCATCAATTTTGGGAGCAGTAAAT…	AGTGTCATCTTTAAGTCACAACAACCCATTATTTAACTGATTTCTTACTAAATTTTGTACGTTACTAGGGCTGTGACTGATTACTTTCACTGCAAACTGAAACTACAACCGTCTGTATGAGGAACAAGTTACATTTTTTCACTGCTTAAAACAACGGCAGCCGAAGGGACATATTTGCACCAGTTCCATCCAGTCCAAACACACACATAACGATTTATCCAGACACATATCAACGTTATTACGTGACCATC	AGTGTCATCTTTAAGTCACAACAACCCATTATTTAACTGATTTCTTACTAAATTTTGTACGTTACTAGGGCTGTGACTGATTACTTTCACTGCAAACTGAAACTACAACCGTCTGTATGAGGAACAAGTTACATTTTTTCACTGCTTAAAACAACGGCAGCCGAAGGGACATATTTGCACCAGTTCCATCCAGTCCAAACACACACATAACGATTTTTCCAGACACATTTCAACGTTATTACGTGACCATC
R. flavipes	A107	33	78	RfA107_2	MK295426	MK295554	MK295299	-79.3851	38.8259	18	7	22	N	1,2	ACATCACTTAGTATACTAATTCGAACAGAACTAGGGCAACCCGGATCTCTAATTGGAGATGACCAGATCTACAACGTTATCGTTACTGCTCATGCATTCGTCATAATTTTCTTTATGGTCATACCAATCATGATTGGTGGATTTGGAAACTGACTAGTACCACTTATATTAGGAGCCCCAGACATGGCATTCCCACGAATAAACAACATAAGATTTTGATTACTCCCACCATCATTAACATTACTACTTACTAGCAGAACAGTAGAAAGTGGAGCAGGGACAGGATGAACAGTTTACCCCCCTCTTGCGAGAGGTATTGCCCATGCAGGAGCATCCGTAGACTTAGCCATCTTCTCCTTACATCTAGCAGGTGTTTCATCAATTTTGGGAGCAGTAAAT…	TTCTTCCACGATCATACATTAATAATTATATTAATAATCATCACAACCGTTATATACATAATAACCACCCTACTTTGAAATAAACATACTAGACGATTCATACTAGAAGGACAACTAATTGAAACTACATGAACAATTGCACCAGCAATTATCTTAGTATTCATTGCAATACCATCCTTACGACTCCTATATCTAATAGACGAAATCCACAACCCAACAATAACCCTAAAAGCAGTAGGACATCAATGATACTGAAGATATGAATATTCAGACTTCACAAAATTAGAATTCGACTCTTACATAATCCCACAAGAGGAAAATCAAGCAAGAACTTTCCGACTACTAGACACAGATAATCGAATTGTACTACCCATAAATTCACCAATCCGACTAGTAGTG…	ACATCACTTAGTATACTAATTCGAACAGAACTAGGGCAACCCGGATCTCTAATTGGAGATGACCAGATCTACAACGTTATCGTTACTGCTCATGCATTCGTCATAATTTTCTTTATGGTCATACCAATCATGATTGGTGGATTTGGAAACTGACTAGTACCACTTATATTAGGAGCCCCAGACATGGCATTCCCACGAATAAACAACATAAGATTTTGATTACTCCCACCATCATTAACATTACTACTTACTAGCAGAACAGTAGAAAGTGGAGCAGGGACAGGATGAACAGTTTACCCCCCTCTTGCGAGAGGTATTGCCCATGCAGGAGCATCCGTAGACTTAGCCATCTTCTCCTTACATCTAGCAGGTGTTTCATCAATTTTGGGAGCAGTAAAT…	AGTGTCATCTTTAAGTCACAACAACCCATTATTTAACTGATTTCTTACTAAATTTTGTACGTTACTAGGGCTGTGACTGATTACTTTCACTGCAAACTGAAACTACAACCGTCTGTATGAGGAACAAGTTACATTTTTTCACTGCTTAAAACAACGGCAGCCGAAGGGACATATTTGCACCAGTTCCATCCAGTCCAAACACACACATAACGATTTATCCAGACACATATCAACGTTATTACGTGACCATC	AGTGTCATCTTTAAGTCACAACAACCCATTATTTAACTGATTTCTTACTAAATTTTGTACGTTACTAGGGCTGTGACTGATTACTTTCACTGCAAACTGAAACTACAACCGTCTGTATGAGGAACAAGTTACATTTTTTCACTGCTTAAAACAACGGCAGCCGAAGGGACATATTTGCACCAGTTCCATCCAGTCCAAACACACACATAACGATTTTTCCAGACACATTTCAACGTTATTACGTGACCATC
R. flavipes	A107	33	79	RfA107_3	MK295427	MK295555	MK295300	-79.3851	38.8259	18	7	22	N	1,2	ACATCACTTAGTATACTAATTCGAACAGAACTAGGGCAACCCGGATCTCTAATTGGAGATGACCAGATCTACAACGTTATCGTTACTGCTCATGCATTCGTCATAATTTTCTTTATGGTCATACCAATCATGATTGGTGGATTTGGAAACTGACTAGTACCACTTATATTAGGAGCCCCAGACATGGCATTCCCACGAATAAACAACATAAGATTTTGATTACTCCCACCATCATTAACATTACTACTTACTAGCAGAACAGTAGAAAGTGGAGCAGGGACAGGATGAACAGTTTACCCCCCTCTTGCGAGAGGTATTGCCCATGCAGGAGCATCCGTAGACTTAGCCATCTTCTCCTTACATCTAGCAGGTGTTTCATCAATTTTGGGAGCAGTAAAT…	TTCTTCCACGATCATACATTAATAATTATATTAATAATCATCACAACCGTTATATACATAATAACCACCCTACTTTGAAATAAACATACTAGACGATTCATACTAGAAGGACAACTAATTGAAACTACATGAACAATTGCACCAGCAATTATCTTAGTATTCATTGCAATACCATCCTTACGACTCCTATATCTAATAGACGAAATCCACAACCCAACAATAACCCTAAAAGCAGTAGGACATCAATGATACTGAAGATATGAATATTCAGACTTCACAAAATTAGAATTCGACTCTTACATAATCCCACAAGAGGAAAATCAAGCAAGAACTTTCCGACTACTAGACACAGATAATCGAATTGTACTACCCATAAATTCACCAATCCGACTAGTAGTG…	ACATCACTTAGTATACTAATTCGAACAGAACTAGGGCAACCCGGATCTCTAATTGGAGATGACCAGATCTACAACGTTATCGTTACTGCTCATGCATTCGTCATAATTTTCTTTATGGTCATACCAATCATGATTGGTGGATTTGGAAACTGACTAGTACCACTTATATTAGGAGCCCCAGACATGGCATTCCCACGAATAAACAACATAAGATTTTGATTACTCCCACCATCATTAACATTACTACTTACTAGCAGAACAGTAGAAAGTGGAGCAGGGACAGGATGAACAGTTTACCCCCCTCTTGCGAGAGGTATTGCCCATGCAGGAGCATCCGTAGACTTAGCCATCTTCTCCTTACATCTAGCAGGTGTTTCATCAATTTTGGGAGCAGTAAAT…	AGTGTCATCTTTAAGTCACAACAACCCATTATTTAACTGATTTCTTACTAAATTTTGTACGTTACTAGGGCTGTGACTGATTACTTTCACTGCAAACTGAAACTACAACCGTCTGTATGAGGAACAAGTTACATTTTTTCACTGCTTAAAACAACGGCAGCCGAAGGGACATATTTGCACCAGTTCCATCCAGTCCAAACACACACATAACGATTTATCCAGACACATATCAACGTTATTACGTGACCATC	AGTGTCATCTTTAAGTCACAACAACCCATTATTTAACTGATTTCTTACTAAATTTTGTACGTTACTAGGGCTGTGACTGATTACTTTCACTGCAAACTGAAACTACAACCGTCTGTATGAGGAACAAGTTACATTTTTTCACTGCTTAAAACAACGGCAGCCGAAGGGACATATTTGCACCAGTTCCATCCAGTCCAAACACACACATAACGATTTTTCCAGACACATTTCAACGTTATTACGTGACCATC
R. flavipes	A108	34	80	RfA108b_1	MK295428	MK295556	MK295301	-79.4849	38.7269	10	8	15	N	1,2	ACATCACTTAGAATATTAATTCGAACAGAACTAGGGCAACCCGGATCTCTAATTGGAGATGACCAGATCTACAACGTTATCGTTACTGCTCATGCATTCGTCATAATTTTCTTTATAGTCATACCAATCATGATTGGTGGATTCGGAAACTGGCTAGTACCACTTATATTAGGAGCCCCAGACATGGCATTCCCACGAATAAACAACATAAGATTTTGATTACTCCCACCGTCATTAACATTACTACTTACTAGCAGAACAGTAGAAAGTGGAGCAGGGACAGGATGAACAGTTTACCCCCCTCTTGCGAGAGGTATTGCCCATGCAGGAGCATCCGTAGACTTAGCCATCTTCTCTTTACATCTAGCAGGTGTTTCATCAATTTTGGGAGCAGTAAAT…	TTCTTCCACGATCATACATTAATAATTATATTAATAATCATCACAACCGTTATATACATGATAACCACCCTACTTTGAAATAAACATACTAGACGATTCATACTAGAAGGACAACTAATTGAAACTACATGAACAATTGCACCAGCAATTATCTTAGTATTCATTGCAATACCATCCTTACGACTTCTATATCTAATAGACGAAATCCACAACCCAACAATAACCCTAAAAGCAGTAGGACATCAATGATACTGAAGATATGAATATTCAGACTTCACAAAATTAGAATTCGACTCTTACATAATCCCACAAGAGGAAAATCAAGCAAGAACTTTCCGACTACTAGACACAGATAATCGAATTGTACTACCCATAAATTCACCAATCCGACTAGTAGTG…	ACATCACTTAGAATATTAATTCGAACAGAACTAGGGCAACCCGGATCTCTAATTGGAGATGACCAGATCTACAACGTTATCGTTACTGCTCATGCATTCGTCATAATTTTCTTTATAGTCATACCAATCATGATTGGTGGATTCGGAAACTGGCTAGTACCACTTATATTAGGAGCCCCAGACATGGCATTCCCACGAATAAACAACATAAGATTTTGATTACTCCCACCGTCATTAACATTACTACTTACTAGCAGAACAGTAGAAAGTGGAGCAGGGACAGGATGAACAGTTTACCCCCCTCTTGCGAGAGGTATTGCCCATGCAGGAGCATCCGTAGACTTAGCCATCTTCTCTTTACATCTAGCAGGTGTTTCATCAATTTTGGGAGCAGTAAAT…	AGTGTCATCTTTAAGTCACAACAACCCATTATTTAACTGATTTCTTACTAAATTTTGTACGTTACTAGGGCTGTGACTGATTACTTTCACTGCAAACTGAAACTACAACCGTCTGTATGAGGAACAAGTTACATTTTTTCACTGCTTAAAACAACGGCAGCCGAAGGGACATATTTGCACCAGTTCCATCCAGTCCAAACACACACATAACGATTTATCCAGACACATATCAACGTTATTACGTGACCATC	AGTGTCATCTTTAAGTCACAACAACCCATTATTTAACTGATTTCTTACTAAATTTTGTACGTTACTAGGGCTGTGACTGATTACTTTCACTGCAAACTGAAACTACAACCGTCTGTATGAGGAACAAGTTACATTTTTTCACTGCTTAAAACAACGGCAGCCGAAGGGACATATTTGCACCAGTTCCATCCAGTCCAAACACACACATAACGATTTTTCCAGACACATTTCAACGTTATTACGTGACCATC
R. flavipes	A108	34	81	RfA108b_2	MK295429	MK295557	MK295302	-79.4849	38.7269	10	8	15	N	1,2	ACATCACTTAGAATATTAATTCGAACAGAACTAGGGCAACCCGGATCTCTAATTGGAGATGACCAGATCTACAACGTTATCGTTACTGCTCATGCATTCGTCATAATTTTCTTTATAGTCATACCAATCATGATTGGTGGATTCGGAAACTGGCTAGTACCACTTATATTAGGAGCCCCAGACATGGCATTCCCACGAATAAACAACATAAGATTTTGATTACTCCCACCGTCATTAACATTACTACTTACTAGCAGAACAGTAGAAAGTGGAGCAGGGACAGGATGAACAGTTTACCCCCCTCTTGCGAGAGGTATTGCCCATGCAGGAGCATCCGTAGACTTAGCCATCTTCTCTTTACATCTAGCAGGTGTTTCATCAATTTTGGGAGCAGTAAAT…	TTCTTCCACGATCATACATTAATAATTATATTAATAATCATCACAACCGTTATATACATGATAACCACCCTACTTTGAAATAAACATACTAGACGATTCATACTAGAAGGACAACTAATTGAAACTACATGAACAATTGCACCAGCAATTATCTTAGTATTCATTGCAATACCATCCTTACGACTTCTATATCTAATAGACGAAATCCACAACCCAACAATAACCCTAAAAGCAGTAGGACATCAATGATACTGAAGATATGAATATTCAGACTTCACAAAATTAGAATTCGACTCTTACATAATCCCACAAGAGGAAAATCAAGCAAGAACTTTCCGACTACTAGACACAGATAATCGAATTGTACTACCCATAAATTCACCAATCCGACTAGTAGTG…	ACATCACTTAGAATATTAATTCGAACAGAACTAGGGCAACCCGGATCTCTAATTGGAGATGACCAGATCTACAACGTTATCGTTACTGCTCATGCATTCGTCATAATTTTCTTTATAGTCATACCAATCATGATTGGTGGATTCGGAAACTGGCTAGTACCACTTATATTAGGAGCCCCAGACATGGCATTCCCACGAATAAACAACATAAGATTTTGATTACTCCCACCGTCATTAACATTACTACTTACTAGCAGAACAGTAGAAAGTGGAGCAGGGACAGGATGAACAGTTTACCCCCCTCTTGCGAGAGGTATTGCCCATGCAGGAGCATCCGTAGACTTAGCCATCTTCTCTTTACATCTAGCAGGTGTTTCATCAATTTTGGGAGCAGTAAAT…	AGTGTCATCTTTAAGTCACAACAACCCATTATTTAACTGATTTCTTACTAAATTTTGTACGTTACTAGGGCTGTGACTGATTACTTTCACTGCAAACTGAAACTACAACCGTCTGTATGAGGAACAAGTTACATTTTTTCACTGCTTAAAACAACGGCAGCCGAAGGGACATATTTGCACCAGTTCCATCCAGTCCAAACACACACATAACGATTTATCCAGACACATATCAACGTTATTACGTGACCATC	AGTGTCATCTTTAAGTCACAACAACCCATTATTTAACTGATTTCTTACTAAATTTTGTACGTTACTAGGGCTGTGACTGATTACTTTCACTGCAAACTGAAACTACAACCGTCTGTATGAGGAACAAGTTACATTTTTTCACTGCTTAAAACAACGGCAGCCGAAGGGACATATTTGCACCAGTTCCATCCAGTCCAAACACACACATAACGATTTTTCCAGACACATTTCAACGTTATTACGTGACCATC
R. flavipes	A108	34	82	RfA108b_3	MK295430	MK295558	MK295303	-79.4849	38.7269	10	8	15	N	1,2	ACATCACTTAGAATATTAATTCGAACAGAACTAGGGCAACCCGGATCTCTAATTGGAGATGACCAGATCTACAACGTTATCGTTACTGCTCATGCATTCGTCATAATTTTCTTTATAGTCATACCAATCATGATTGGTGGATTCGGAAACTGGCTAGTACCACTTATATTAGGAGCCCCAGACATGGCATTCCCACGAATAAACAACATAAGATTTTGATTACTCCCACCGTCATTAACATTACTACTTACTAGCAGAACAGTAGAAAGTGGAGCAGGGACAGGATGAACAGTTTACCCCCCTCTTGCGAGAGGTATTGCCCATGCAGGAGCATCCGTAGACTTAGCCATCTTCTCTTTACATCTAGCAGGTGTTTCATCAATTTTGGGAGCAGTAAAT…	TTCTTCCACGATCATACATTAATAATTATATTAATAATCATCACAACCGTTATATACATGATAACCACCCTACTTTGAAATAAACATACTAGACGATTCATACTAGAAGGACAACTAATTGAAACTACATGAACAATTGCACCAGCAATTATCTTAGTATTCATTGCAATACCATCCTTACGACTTCTATATCTAATAGACGAAATCCACAACCCAACAATAACCCTAAAAGCAGTAGGACATCAATGATACTGAAGATATGAATATTCAGACTTCACAAAATTAGAATTCGACTCTTACATAATCCCACAAGAGGAAAATCAAGCAAGAACTTTCCGACTACTAGACACAGATAATCGAATTGTACTACCCATAAATTCACCAATCCGACTAGTAGTG…	ACATCACTTAGAATATTAATTCGAACAGAACTAGGGCAACCCGGATCTCTAATTGGAGATGACCAGATCTACAACGTTATCGTTACTGCTCATGCATTCGTCATAATTTTCTTTATAGTCATACCAATCATGATTGGTGGATTCGGAAACTGGCTAGTACCACTTATATTAGGAGCCCCAGACATGGCATTCCCACGAATAAACAACATAAGATTTTGATTACTCCCACCGTCATTAACATTACTACTTACTAGCAGAACAGTAGAAAGTGGAGCAGGGACAGGATGAACAGTTTACCCCCCTCTTGCGAGAGGTATTGCCCATGCAGGAGCATCCGTAGACTTAGCCATCTTCTCTTTACATCTAGCAGGTGTTTCATCAATTTTGGGAGCAGTAAAT…	AGTGTCATCTTTAAGTCACAACAACCCATTATTTAACTGATTTCTTACTAAATTTTGTACGTTACTAGGGCTGTGACTGATTACTTTCACTGCAAACTGAAACTACAACCGTCTGTATGAGGAACAAGTTACATTTTTTCACTGCTTAAAACAACGGCAGCCGAAGGGACATATTTGCACCAGTTCCATCCAGTCCAAACACACACATAACGATTTATCCAGACACATATCAACGTTATTACGTGACCATC	AGTGTCATCTTTAAGTCACAACAACCCATTATTTAACTGATTTCTTACTAAATTTTGTACGTTACTAGGGCTGTGACTGATTACTTTCACTGCAAACTGAAACTACAACCGTCTGTATGAGGAACAAGTTACATTTTTTCACTGCTTAAAACAACGGCAGCCGAAGGGACATATTTGCACCAGTTCCATCCAGTCCAAACACACACATAACGATTTTTCCAGACACATTTCAACGTTATTACGTGACCATC
R. flavipes	A117	35	83	RfA117b_1	MK295431	MK295559	MK295304	-85.8066	33.471	19	14	23	C	2,3	ACATCACTCAGAATACTAATTCGAACAGAACTAGGGCAACCCGGATCTCTAATTGGAGATGACCAGATCTACAACGTTATCGTTACTGCTCATGCATTCGTCATAATTTTCTTTATAGTCATACCAATCATGATTGGTGGATTCGGAAACTGATTAGTACCACTTATATTAGGAGCCCCAGACATGGCATTCCCACGAATAAACAACATAAGATTTTGATTACTCCCACCGTCATTAACATTATTACTTACTAGCAGAACAGTAGAAAGTGGAGCAGGGACAGGATGAACAGTCTACCCCCCTCTTGCGAGAGGTATTGCCCATGCAGGAGCATCCGTAGACTTAGCCATCTTCTCCTTACATCTAGCAGGTGTTTCATCAATTTTGGGAGCAGTAAAT…	TTCTTCCACGATCATACATTAATAATTATATTAATAATCATCACAACCGTTATATACATGATAACCACCCTACTTTGAAACAAACATACTAGACGATTCATACTAGAAGGACAACTAATTGAAACTACATGAACAATTGCACCAGCAATTATCTTAGTATTCATTGCAATACCATCCTTACGACTTCTATATCTAATAGACGAAATCCACAACCCAACAATAACCCTAAAAGCAGTGGGACATCAATGATACTGAAGATATGAATATTCAGACTTCACAAAATTAGAATTTGACTCTTACATAATCCCACAAGAGGAAAATCAAGCAAGAACTTTCCGACTACTAGACACAGATAATCGAATTGTACTACCCATAAATTCACCAATCCGACTAGTAGTA…	ACATCACTCAGAATACTAATTCGAACAGAACTAGGGCAACCCGGATCTCTAATTGGAGATGACCAGATCTACAACGTTATCGTTACTGCTCATGCATTCGTCATAATTTTCTTTATAGTCATACCAATCATGATTGGTGGATTCGGAAACTGATTAGTACCACTTATATTAGGAGCCCCAGACATGGCATTCCCACGAATAAACAACATAAGATTTTGATTACTCCCACCGTCATTAACATTATTACTTACTAGCAGAACAGTAGAAAGTGGAGCAGGGACAGGATGAACAGTCTACCCCCCTCTTGCGAGAGGTATTGCCCATGCAGGAGCATCCGTAGACTTAGCCATCTTCTCCTTACATCTAGCAGGTGTTTCATCAATTTTGGGAGCAGTAAAT…	AGTGTCATCTTTAAGTCACAACAACCCATTATTTAACTGATTTCTTACTAAATTTTGTACGTTACTAGGGCTGTGACTGATTACTTTCACTGCAAACTGAAACTACAACCGTCTGTATGAGGAACAAGTTACATTTTTTCACTGCTTAAAACAACGGCAGCCGAAGGGACATATTTGCACCAGTTCCATCCAGTCCAAACACACACATAACGATTTTTCCAGACACATTTCAACGTTATTACGTGACCATC	AGTGTCATCTTTAAGTCACAACAACCCATTATTTAACTGATTTCTTACTAAATTTTGTACGTTACTAGGGCTGTGACTGATTACTTTCACTGCAAACTGAAACTACAACCGTCTGTATGAGGAACAAGTTACATTTTTTCACTGCTTAAAACAACGGCAGCCGACGGGACATATTTGCACCAGTTCCATCCAGTCCAAACACACACATAACGATTTTTCCAGACACATTTCAACGTTATTACGTGACCATC
R. flavipes	A117	35	84	RfA117b_2	MK295432	MK295560	MK295305	-85.8066	33.471	19	14	23	C	2,3	ACATCACTCAGAATACTAATTCGAACAGAACTAGGGCAACCCGGATCTCTAATTGGAGATGACCAGATCTACAACGTTATCGTTACTGCTCATGCATTCGTCATAATTTTCTTTATAGTCATACCAATCATGATTGGTGGATTCGGAAACTGATTAGTACCACTTATATTAGGAGCCCCAGACATGGCATTCCCACGAATAAACAACATAAGATTTTGATTACTCCCACCGTCATTAACATTATTACTTACTAGCAGAACAGTAGAAAGTGGAGCAGGGACAGGATGAACAGTCTACCCCCCTCTTGCGAGAGGTATTGCCCATGCAGGAGCATCCGTAGACTTAGCCATCTTCTCCTTACATCTAGCAGGTGTTTCATCAATTTTGGGAGCAGTAAAT…	TTCTTCCACGATCATACATTAATAATTATATTAATAATCATCACAACCGTTATATACATGATAACCACCCTACTTTGAAACAAACATACTAGACGATTCATACTAGAAGGACAACTAATTGAAACTACATGAACAATTGCACCAGCAATTATCTTAGTATTCATTGCAATACCATCCTTACGACTTCTATATCTAATAGACGAAATCCACAACCCAACAATAACCCTAAAAGCAGTGGGACATCAATGATACTGAAGATATGAATATTCAGACTTCACAAAATTAGAATTTGACTCTTACATAATCCCACAAGAGGAAAATCAAGCAAGAACTTTCCGACTACTAGACACAGATAATCGAATTGTACTACCCATAAATTCACCAATCCGACTAGTAGTA…	ACATCACTCAGAATACTAATTCGAACAGAACTAGGGCAACCCGGATCTCTAATTGGAGATGACCAGATCTACAACGTTATCGTTACTGCTCATGCATTCGTCATAATTTTCTTTATAGTCATACCAATCATGATTGGTGGATTCGGAAACTGATTAGTACCACTTATATTAGGAGCCCCAGACATGGCATTCCCACGAATAAACAACATAAGATTTTGATTACTCCCACCGTCATTAACATTATTACTTACTAGCAGAACAGTAGAAAGTGGAGCAGGGACAGGATGAACAGTCTACCCCCCTCTTGCGAGAGGTATTGCCCATGCAGGAGCATCCGTAGACTTAGCCATCTTCTCCTTACATCTAGCAGGTGTTTCATCAATTTTGGGAGCAGTAAAT…	AGTGTCATCTTTAAGTCACAACAACCCATTATTTAACTGATTTCTTACTAAATTTTGTACGTTACTAGGGCTGTGACTGATTACTTTCACTGCAAACTGAAACTACAACCGTCTGTATGAGGAACAAGTTACATTTTTTCACTGCTTAAAACAACGGCAGCCGAAGGGACATATTTGCACCAGTTCCATCCAGTCCAAACACACACATAACGATTTTTCCAGACACATTTCAACGTTATTACGTGACCATC	AGTGTCATCTTTAAGTCACAACAACCCATTATTTAACTGATTTCTTACTAAATTTTGTACGTTACTAGGGCTGTGACTGATTACTTTCACTGCAAACTGAAACTACAACCGTCTGTATGAGGAACAAGTTACATTTTTTCACTGCTTAAAACAACGGCAGCCGACGGGACATATTTGCACCAGTTCCATCCAGTCCAAACACACACATAACGATTTTTCCAGACACATTTCAACGTTATTACGTGACCATC
R. flavipes	A117	35	85	RfA117b_3	MK295433	MK295561	MK295306	-85.8066	33.471	19	14	23	C	2,3	ACATCACTCAGAATACTAATTCGAACAGAACTAGGGCAACCCGGATCTCTAATTGGAGATGACCAGATCTACAACGTTATCGTTACTGCTCATGCATTCGTCATAATTTTCTTTATAGTCATACCAATCATGATTGGTGGATTCGGAAACTGATTAGTACCACTTATATTAGGAGCCCCAGACATGGCATTCCCACGAATAAACAACATAAGATTTTGATTACTCCCACCGTCATTAACATTATTACTTACTAGCAGAACAGTAGAAAGTGGAGCAGGGACAGGATGAACAGTCTACCCCCCTCTTGCGAGAGGTATTGCCCATGCAGGAGCATCCGTAGACTTAGCCATCTTCTCCTTACATCTAGCAGGTGTTTCATCAATTTTGGGAGCAGTAAAT…	TTCTTCCACGATCATACATTAATAATTATATTAATAATCATCACAACCGTTATATACATGATAACCACCCTACTTTGAAACAAACATACTAGACGATTCATACTAGAAGGACAACTAATTGAAACTACATGAACAATTGCACCAGCAATTATCTTAGTATTCATTGCAATACCATCCTTACGACTTCTATATCTAATAGACGAAATCCACAACCCAACAATAACCCTAAAAGCAGTGGGACATCAATGATACTGAAGATATGAATATTCAGACTTCACAAAATTAGAATTTGACTCTTACATAATCCCACAAGAGGAAAATCAAGCAAGAACTTTCCGACTACTAGACACAGATAATCGAATTGTACTACCCATAAATTCACCAATCCGACTAGTAGTA…	ACATCACTCAGAATACTAATTCGAACAGAACTAGGGCAACCCGGATCTCTAATTGGAGATGACCAGATCTACAACGTTATCGTTACTGCTCATGCATTCGTCATAATTTTCTTTATAGTCATACCAATCATGATTGGTGGATTCGGAAACTGATTAGTACCACTTATATTAGGAGCCCCAGACATGGCATTCCCACGAATAAACAACATAAGATTTTGATTACTCCCACCGTCATTAACATTATTACTTACTAGCAGAACAGTAGAAAGTGGAGCAGGGACAGGATGAACAGTCTACCCCCCTCTTGCGAGAGGTATTGCCCATGCAGGAGCATCCGTAGACTTAGCCATCTTCTCCTTACATCTAGCAGGTGTTTCATCAATTTTGGGAGCAGTAAAT…	AGTGTCATCTTTAAGTCACAACAACCCATTATTTAACTGATTTCTTACTAAATTTTGTACGTTACTAGGGCTGTGACTGATTACTTTCACTGCAAACTGAAACTACAACCGTCTGTATGAGGAACAAGTTACATTTTTTCACTGCTTAAAACAACGGCAGCCGAAGGGACATATTTGCACCAGTTCCATCCAGTCCAAACACACACATAACGATTTTTCCAGACACATTTCAACGTTATTACGTGACCATC	AGTGTCATCTTTAAGTCACAACAACCCATTATTTAACTGATTTCTTACTAAATTTTGTACGTTACTAGGGCTGTGACTGATTACTTTCACTGCAAACTGAAACTACAACCGTCTGTATGAGGAACAAGTTACATTTTTTCACTGCTTAAAACAACGGCAGCCGACGGGACATATTTGCACCAGTTCCATCCAGTCCAAACACACACATAACGATTTTTCCAGACACATTTCAACGTTATTACGTGACCATC
R. flavipes	A124	36	86	RfA124_1	MK295434	MK295562	MK295307	-85.8732	33.4045	20	5	24	C	1,2	ACATCACTTAGAATACTAATTCGAACAGAACTAGGGCAACCCGGATCTCTAATTGGAGATGACCAGATCTACAACGTTATCGTTACTGCTCATGCATTCGTCATAATTTTCTTTATAGTCATACCAATCATGATTGGTGGATTCGGGAACTGATTAGTACCACTTATATTAGGAGCCCCAGACATGGCATTCCCACGAATAAACAACATAAGATTTTGATTACTCCCACCGTCATTAACATTACTACTTACTAGCAGAACAGTAGAAAGTGGAGCAGGGACAGGATGAACAGTCTACCCCCCTCTTGCGAGAGGTATTGCCCATGCAGGAGCATCCGTAGACTTAGCCATCTTCTCCTTACATCTAGCAGGTGTTTCATCAATTTTGGGAGCAGTAAAT…	TTCTTCCACGATCATACATTAATAATTATATTAATAATCATCACAACCGTTATATACATGATAACCACCCTACTTTGAAATAAACATACTAGACGATTCATACTAGAAGGACAACTAATTGAAACTACATGAACAATTGCACCAGCAATTATCTTAGTATTCATTGCAATACCATCCTTACGACTTCTATATCTAATAGACGAAATCCACAACCCAACAATAACCCTAAAAGCAGTGGGACATCAATGATACTGAAGATATGAATATTCAGACTTCACAAAATTAGAATTCGACTCTTACATAATCCCACAAGAGGAAAATCAAGCAAGAACTTTCCGACTACTAGACACAGATAATCGAATTGTACTACCCATAAATTCACCAATCCGACTAGTAGTG…	ACATCACTTAGAATACTAATTCGAACAGAACTAGGGCAACCCGGATCTCTAATTGGAGATGACCAGATCTACAACGTTATCGTTACTGCTCATGCATTCGTCATAATTTTCTTTATAGTCATACCAATCATGATTGGTGGATTCGGGAACTGATTAGTACCACTTATATTAGGAGCCCCAGACATGGCATTCCCACGAATAAACAACATAAGATTTTGATTACTCCCACCGTCATTAACATTACTACTTACTAGCAGAACAGTAGAAAGTGGAGCAGGGACAGGATGAACAGTCTACCCCCCTCTTGCGAGAGGTATTGCCCATGCAGGAGCATCCGTAGACTTAGCCATCTTCTCCTTACATCTAGCAGGTGTTTCATCAATTTTGGGAGCAGTAAAT…	AGTGTCATCTTTAAGTCACAACAACCCATTATTTAACTGATTTCTTACTAAATTTTGTACGTTACTAGGGCTGTGACTGATTACTTTCACTGCAAACTGAAACTACAACCGTCTGTATGAGGAACAAGTTACATTTTTTCACTGCTTAAAACAACGGCAGCCGAAGGGACATATTTGCACCAGTTCCATCCAGTCCAAACACACACATAACGATTTATCCAGACACATATCAACGTTATTACGTGACCATC	AGTGTCATCTTTAAGTCACAACAACCCATTATTTAACTGATTTCTTACTAAATTTTGTACGTTACTAGGGCTGTGACTGATTACTTTCACTGCAAACTGAAACTACAACCGTCTGTATGAGGAACAAGTTACATTTTTTCACTGCTTAAAACAACGGCAGCCGAAGGGACATATTTGCACCAGTTCCATCCAGTCCAAACACACACATAACGATTTTTCCAGACACATTTCAACGTTATTACGTGACCATC
R. flavipes	A124	36	87	RfA124_2	MK295435	MK295563	MK295308	-85.8732	33.4045	20	5	24	C	1,2	ACATCACTTAGAATACTAATTCGAACAGAACTAGGGCAACCCGGATCTCTAATTGGAGATGACCAGATCTACAACGTTATCGTTACTGCTCATGCATTCGTCATAATTTTCTTTATAGTCATACCAATCATGATTGGTGGATTCGGGAACTGATTAGTACCACTTATATTAGGAGCCCCAGACATGGCATTCCCACGAATAAACAACATAAGATTTTGATTACTCCCACCGTCATTAACATTACTACTTACTAGCAGAACAGTAGAAAGTGGAGCAGGGACAGGATGAACAGTCTACCCCCCTCTTGCGAGAGGTATTGCCCATGCAGGAGCATCCGTAGACTTAGCCATCTTCTCCTTACATCTAGCAGGTGTTTCATCAATTTTGGGAGCAGTAAAT…	TTCTTCCACGATCATACATTAATAATTATATTAATAATCATCACAACCGTTATATACATGATAACCACCCTACTTTGAAATAAACATACTAGACGATTCATACTAGAAGGACAACTAATTGAAACTACATGAACAATTGCACCAGCAATTATCTTAGTATTCATTGCAATACCATCCTTACGACTTCTATATCTAATAGACGAAATCCACAACCCAACAATAACCCTAAAAGCAGTGGGACATCAATGATACTGAAGATATGAATATTCAGACTTCACAAAATTAGAATTCGACTCTTACATAATCCCACAAGAGGAAAATCAAGCAAGAACTTTCCGACTACTAGACACAGATAATCGAATTGTACTACCCATAAATTCACCAATCCGACTAGTAGTG…	ACATCACTTAGAATACTAATTCGAACAGAACTAGGGCAACCCGGATCTCTAATTGGAGATGACCAGATCTACAACGTTATCGTTACTGCTCATGCATTCGTCATAATTTTCTTTATAGTCATACCAATCATGATTGGTGGATTCGGGAACTGATTAGTACCACTTATATTAGGAGCCCCAGACATGGCATTCCCACGAATAAACAACATAAGATTTTGATTACTCCCACCGTCATTAACATTACTACTTACTAGCAGAACAGTAGAAAGTGGAGCAGGGACAGGATGAACAGTCTACCCCCCTCTTGCGAGAGGTATTGCCCATGCAGGAGCATCCGTAGACTTAGCCATCTTCTCCTTACATCTAGCAGGTGTTTCATCAATTTTGGGAGCAGTAAAT…	AGTGTCATCTTTAAGTCACAACAACCCATTATTTAACTGATTTCTTACTAAATTTTGTACGTTACTAGGGCTGTGACTGATTACTTTCACTGCAAACTGAAACTACAACCGTCTGTATGAGGAACAAGTTACATTTTTTCACTGCTTAAAACAACGGCAGCCGAAGGGACATATTTGCACCAGTTCCATCCAGTCCAAACACACACATAACGATTTATCCAGACACATATCAACGTTATTACGTGACCATC	AGTGTCATCTTTAAGTCACAACAACCCATTATTTAACTGATTTCTTACTAAATTTTGTACGTTACTAGGGCTGTGACTGATTACTTTCACTGCAAACTGAAACTACAACCGTCTGTATGAGGAACAAGTTACATTTTTTCACTGCTTAAAACAACGGCAGCCGAAGGGACATATTTGCACCAGTTCCATCCAGTCCAAACACACACATAACGATTTTTCCAGACACATTTCAACGTTATTACGTGACCATC
R. flavipes	A124	36	88	RfA124_3	MK295436	MK295564	MK295309	-85.8732	33.4045	20	5	24	C	1,2	ACATCACTTAGAATACTAATTCGAACAGAACTAGGGCAACCCGGATCTCTAATTGGAGATGACCAGATCTACAACGTTATCGTTACTGCTCATGCATTCGTCATAATTTTCTTTATAGTCATACCAATCATGATTGGTGGATTCGGGAACTGATTAGTACCACTTATATTAGGAGCCCCAGACATGGCATTCCCACGAATAAACAACATAAGATTTTGATTACTCCCACCGTCATTAACATTACTACTTACTAGCAGAACAGTAGAAAGTGGAGCAGGGACAGGATGAACAGTCTACCCCCCTCTTGCGAGAGGTATTGCCCATGCAGGAGCATCCGTAGACTTAGCCATCTTCTCCTTACATCTAGCAGGTGTTTCATCAATTTTGGGAGCAGTAAAT…	TTCTTCCACGATCATACATTAATAATTATATTAATAATCATCACAACCGTTATATACATGATAACCACCCTACTTTGAAATAAACATACTAGACGATTCATACTAGAAGGACAACTAATTGAAACTACATGAACAATTGCACCAGCAATTATCTTAGTATTCATTGCAATACCATCCTTACGACTTCTATATCTAATAGACGAAATCCACAACCCAACAATAACCCTAAAAGCAGTGGGACATCAATGATACTGAAGATATGAATATTCAGACTTCACAAAATTAGAATTCGACTCTTACATAATCCCACAAGAGGAAAATCAAGCAAGAACTTTCCGACTACTAGACACAGATAATCGAATTGTACTACCCATAAATTCACCAATCCGACTAGTAGTG…	ACATCACTTAGAATACTAATTCGAACAGAACTAGGGCAACCCGGATCTCTAATTGGAGATGACCAGATCTACAACGTTATCGTTACTGCTCATGCATTCGTCATAATTTTCTTTATAGTCATACCAATCATGATTGGTGGATTCGGGAACTGATTAGTACCACTTATATTAGGAGCCCCAGACATGGCATTCCCACGAATAAACAACATAAGATTTTGATTACTCCCACCGTCATTAACATTACTACTTACTAGCAGAACAGTAGAAAGTGGAGCAGGGACAGGATGAACAGTCTACCCCCCTCTTGCGAGAGGTATTGCCCATGCAGGAGCATCCGTAGACTTAGCCATCTTCTCCTTACATCTAGCAGGTGTTTCATCAATTTTGGGAGCAGTAAAT…	AGTGTCATCTTTAAGTCACAACAACCCATTATTTAACTGATTTCTTACTAAATTTTGTACGTTACTAGGGCTGTGACTGATTACTTTCACTGCAAACTGAAACTACAACCGTCTGTATGAGGAACAAGTTACATTTTTTCACTGCTTAAAACAACGGCAGCCGAAGGGACATATTTGCACCAGTTCCATCCAGTCCAAACACACACATAACGATTTATCCAGACACATATCAACGTTATTACGTGACCATC	AGTGTCATCTTTAAGTCACAACAACCCATTATTTAACTGATTTCTTACTAAATTTTGTACGTTACTAGGGCTGTGACTGATTACTTTCACTGCAAACTGAAACTACAACCGTCTGTATGAGGAACAAGTTACATTTTTTCACTGCTTAAAACAACGGCAGCCGAAGGGACATATTTGCACCAGTTCCATCCAGTCCAAACACACACATAACGATTTTTCCAGACACATTTCAACGTTATTACGTGACCATC
R. flavipes	A124	37	89	RfA124c_1	MK295437	MK295565	MK295310	-85.8732	33.4045	3	3	3	S	3,3	ACATCACTTAGAATACTAATTCGAACAGAACTAGGGCAACCCGGATCTCTAATTGGAGATGACCAGATCTATAACGTCATCGTTACTGCTCATGCATTCGTCATAATTTTCTTTATGGTCATACCAATCATGATTGGTGGATTCGGAAACTGACTAGTACCACTTATATTAGGGGCCCCAGACATAGCATTCCCACGAATAAACAACATAAGATTTTGATTACTACCACCATCATTAACTCTACTACTTACTAGCAGAACAGTAGAAAGTGGAGCAGGGACAGGATGAACAGTTTACCCCCCTCTTGCGAGAGGTATTGCCCACGCAGGAGCATCCGTAGACTTAGCCATCTTCTCCTTACATCTAGCAGGTGTTTCATCAATTTTGGGAGCAGTAAAT…	TTCTTCCACGATCATACATTAATAATCATATTAATAATCATCACAACCGTTATATACATAATAACCACCCTACTTTGAAATAAACACACCAGACGATTCATACTAGAAGGACAACTAATTGAAACTACATGAACAATTGCACCAGCAATCATCCTAGTATTCATTGCAATACCATCCTTACGACTTCTATATCTAATAGACGAAATCCACAACCCAACAATAACCCTAAAGGCAGTAGGACATCAGTGATACTGAAGATATGAATACTCAGACTTCACAAAATTAGAATTCGACTCTTACATAATCCCACAAGAGGAAAATCAAGCAAGAACTTTCCGACTACTAGACACAGATAATCGAATTGTACTACCCATAAATTCACCAATCCGACTGGTAGTG…	ACATCACTTAGAATACTAATTCGAACAGAACTAGGGCAACCCGGATCTCTAATTGGAGATGACCAGATCTATAACGTCATCGTTACTGCTCATGCATTCGTCATAATTTTCTTTATGGTCATACCAATCATGATTGGTGGATTCGGAAACTGACTAGTACCACTTATATTAGGGGCCCCAGACATAGCATTCCCACGAATAAACAACATAAGATTTTGATTACTACCACCATCATTAACTCTACTACTTACTAGCAGAACAGTAGAAAGTGGAGCAGGGACAGGATGAACAGTTTACCCCCCTCTTGCGAGAGGTATTGCCCACGCAGGAGCATCCGTAGACTTAGCCATCTTCTCCTTACATCTAGCAGGTGTTTCATCAATTTTGGGAGCAGTAAAT…	AGTGTCATCTTTAAGTCACAACAACCCATTATTTAACTGATTTCTTACTAAATTTTGTACGTTACTAGGGCTGTGACTGATTACTTTCACTGCAAACTGAAACTACAACCGTCTGTATGAGGAACAAGTTACATTTTTTCACTGCTTAAAACAACGGCAGCCGACGGGACATATTTGCACCAGTTCCATCCAGTCCAAACACACACATAACGATTTTTCCAGACACATTTCAACGTTATTACGTGACCATC	AGTGTCATCTTTAAGTCACAACAACCCATTATTTAACTGATTTCTTACTAAATTTTGTACGTTACTAGGGCTGTGACTGATTACTTTCACTGCAAACTGAAACTACAACCGTCTGTATGAGGAACAAGTTACATTTTTTCACTGCTTAAAACAACGGCAGCCGACGGGACATATTTGCACCAGTTCCATCCAGTCCAAACACACACATAACGATTTTTCCAGACACATTTCAACGTTATTACGTGACCATC
R. flavipes	A124	37	90	RfA124c_2	MK295438	MK295566	MK295311	-85.8732	33.4045	3	3	3	S	3,3	ACATCACTTAGAATACTAATTCGAACAGAACTAGGGCAACCCGGATCTCTAATTGGAGATGACCAGATCTATAACGTCATCGTTACTGCTCATGCATTCGTCATAATTTTCTTTATGGTCATACCAATCATGATTGGTGGATTCGGAAACTGACTAGTACCACTTATATTAGGGGCCCCAGACATAGCATTCCCACGAATAAACAACATAAGATTTTGATTACTACCACCATCATTAACTCTACTACTTACTAGCAGAACAGTAGAAAGTGGAGCAGGGACAGGATGAACAGTTTACCCCCCTCTTGCGAGAGGTATTGCCCACGCAGGAGCATCCGTAGACTTAGCCATCTTCTCCTTACATCTAGCAGGTGTTTCATCAATTTTGGGAGCAGTAAAT…	TTCTTCCACGATCATACATTAATAATCATATTAATAATCATCACAACCGTTATATACATAATAACCACCCTACTTTGAAATAAACACACCAGACGATTCATACTAGAAGGACAACTAATTGAAACTACATGAACAATTGCACCAGCAATCATCCTAGTATTCATTGCAATACCATCCTTACGACTTCTATATCTAATAGACGAAATCCACAACCCAACAATAACCCTAAAGGCAGTAGGACATCAGTGATACTGAAGATATGAATACTCAGACTTCACAAAATTAGAATTCGACTCTTACATAATCCCACAAGAGGAAAATCAAGCAAGAACTTTCCGACTACTAGACACAGATAATCGAATTGTACTACCCATAAATTCACCAATCCGACTGGTAGTG…	ACATCACTTAGAATACTAATTCGAACAGAACTAGGGCAACCCGGATCTCTAATTGGAGATGACCAGATCTATAACGTCATCGTTACTGCTCATGCATTCGTCATAATTTTCTTTATGGTCATACCAATCATGATTGGTGGATTCGGAAACTGACTAGTACCACTTATATTAGGGGCCCCAGACATAGCATTCCCACGAATAAACAACATAAGATTTTGATTACTACCACCATCATTAACTCTACTACTTACTAGCAGAACAGTAGAAAGTGGAGCAGGGACAGGATGAACAGTTTACCCCCCTCTTGCGAGAGGTATTGCCCACGCAGGAGCATCCGTAGACTTAGCCATCTTCTCCTTACATCTAGCAGGTGTTTCATCAATTTTGGGAGCAGTAAAT…	AGTGTCATCTTTAAGTCACAACAACCCATTATTTAACTGATTTCTTACTAAATTTTGTACGTTACTAGGGCTGTGACTGATTACTTTCACTGCAAACTGAAACTACAACCGTCTGTATGAGGAACAAGTTACATTTTTTCACTGCTTAAAACAACGGCAGCCGACGGGACATATTTGCACCAGTTCCATCCAGTCCAAACACACACATAACGATTTTTCCAGACACATTTCAACGTTATTACGTGACCATC	AGTGTCATCTTTAAGTCACAACAACCCATTATTTAACTGATTTCTTACTAAATTTTGTACGTTACTAGGGCTGTGACTGATTACTTTCACTGCAAACTGAAACTACAACCGTCTGTATGAGGAACAAGTTACATTTTTTCACTGCTTAAAACAACGGCAGCCGACGGGACATATTTGCACCAGTTCCATCCAGTCCAAACACACACATAACGATTTTTCCAGACACATTTCAACGTTATTACGTGACCATC
R. flavipes	A124	37	91	RfA124c_3	MK295439	MK295567	MK295312	-85.8732	33.4045	3	3	3	S	3,3	ACATCACTTAGAATACTAATTCGAACAGAACTAGGGCAACCCGGATCTCTAATTGGAGATGACCAGATCTATAACGTCATCGTTACTGCTCATGCATTCGTCATAATTTTCTTTATGGTCATACCAATCATGATTGGTGGATTCGGAAACTGACTAGTACCACTTATATTAGGGGCCCCAGACATAGCATTCCCACGAATAAACAACATAAGATTTTGATTACTACCACCATCATTAACTCTACTACTTACTAGCAGAACAGTAGAAAGTGGAGCAGGGACAGGATGAACAGTTTACCCCCCTCTTGCGAGAGGTATTGCCCACGCAGGAGCATCCGTAGACTTAGCCATCTTCTCCTTACATCTAGCAGGTGTTTCATCAATTTTGGGAGCAGTAAAT…	TTCTTCCACGATCATACATTAATAATCATATTAATAATCATCACAACCGTTATATACATAATAACCACCCTACTTTGAAATAAACACACCAGACGATTCATACTAGAAGGACAACTAATTGAAACTACATGAACAATTGCACCAGCAATCATCCTAGTATTCATTGCAATACCATCCTTACGACTTCTATATCTAATAGACGAAATCCACAACCCAACAATAACCCTAAAGGCAGTAGGACATCAGTGATACTGAAGATATGAATACTCAGACTTCACAAAATTAGAATTCGACTCTTACATAATCCCACAAGAGGAAAATCAAGCAAGAACTTTCCGACTACTAGACACAGATAATCGAATTGTACTACCCATAAATTCACCAATCCGACTGGTAGTG…	ACATCACTTAGAATACTAATTCGAACAGAACTAGGGCAACCCGGATCTCTAATTGGAGATGACCAGATCTATAACGTCATCGTTACTGCTCATGCATTCGTCATAATTTTCTTTATGGTCATACCAATCATGATTGGTGGATTCGGAAACTGACTAGTACCACTTATATTAGGGGCCCCAGACATAGCATTCCCACGAATAAACAACATAAGATTTTGATTACTACCACCATCATTAACTCTACTACTTACTAGCAGAACAGTAGAAAGTGGAGCAGGGACAGGATGAACAGTTTACCCCCCTCTTGCGAGAGGTATTGCCCACGCAGGAGCATCCGTAGACTTAGCCATCTTCTCCTTACATCTAGCAGGTGTTTCATCAATTTTGGGAGCAGTAAAT…	AGTGTCATCTTTAAGTCACAACAACCCATTATTTAACTGATTTCTTACTAAATTTTGTACGTTACTAGGGCTGTGACTGATTACTTTCACTGCAAACTGAAACTACAACCGTCTGTATGAGGAACAAGTTACATTTTTTCACTGCTTAAAACAACGGCAGCCGACGGGACATATTTGCACCAGTTCCATCCAGTCCAAACACACACATAACGATTTTTCCAGACACATTTCAACGTTATTACGTGACCATC	AGTGTCATCTTTAAGTCACAACAACCCATTATTTAACTGATTTCTTACTAAATTTTGTACGTTACTAGGGCTGTGACTGATTACTTTCACTGCAAACTGAAACTACAACCGTCTGTATGAGGAACAAGTTACATTTTTTCACTGCTTAAAACAACGGCAGCCGACGGGACATATTTGCACCAGTTCCATCCAGTCCAAACACACACATAACGATTTTTCCAGACACATTTCAACGTTATTACGTGACCATC
R. flavipes	A131	38	92	RfA131b_1	MK295440	MK295568	MK295313	-87.3327	34.4198	21	15	25	S	4,4	ACATCACTTAGAATACTAATTCGAACAGAACTAGGACAACCCGGATCTCTAATTGGAGATGACCAGATCTACAACGTTATCGTTACCGCTCATGCATTCGTCATAATTTTCTTTATGGTCATACCAATCATGATTGGTGGATTTGGAAACTGACTAGTACCACTTATATTAGGAGCCCCAGACATGGCATTCCCACGAATAAACAACATAAGATTTTGATTACTCCCACCATCATTAACATTACTACTTACTAGCAGAACAGTAGAAAGTGGAGCAGGGACAGGATGAACAGTTTACCCCCCTCTTGCGAGAGGTATTGCCCACGCAGGAGCATCCGTAGACTTAGCCATCTTCTCCTTACATCTAGCAGGTGTTTCATCAATTTTGGGAGCAGTAAAT…	TTCTTTCACGATCATACATTAATAATTATATTAATAATCATCACAACCGTTATATACATAATAACCACCCTGCTTTGAAATAAACACACCAGACGATTCATACTAGAAGGACAACTAATTGAAACTACATGAACAATTGCACCAGCAATTATCCTAGTATTCATTGCAATACCATCCTTACGACTTCTATATCTAATAGACGAAATCCACAACCCAACAATAACCCTAAAGGCAGTAGGACATCAATGATACTGAAGATATGAATACTCAGACTTCACAAAATTAGAATTCGACTCTTACATAATCCCACAAGAGGAAAATCAAGCAAGAGCTTTCCGACTACTAGACACAGATAATCGAATTGTACTACCCATAAATTCACCAATCCGACTGGTAGTG…	ACATCACTTAGAATACTAATTCGAACAGAACTAGGACAACCCGGATCTCTAATTGGAGATGACCAGATCTACAACGTTATCGTTACCGCTCATGCATTCGTCATAATTTTCTTTATGGTCATACCAATCATGATTGGTGGATTTGGAAACTGACTAGTACCACTTATATTAGGAGCCCCAGACATGGCATTCCCACGAATAAACAACATAAGATTTTGATTACTCCCACCATCATTAACATTACTACTTACTAGCAGAACAGTAGAAAGTGGAGCAGGGACAGGATGAACAGTTTACCCCCCTCTTGCGAGAGGTATTGCCCACGCAGGAGCATCCGTAGACTTAGCCATCTTCTCCTTACATCTAGCAGGTGTTTCATCAATTTTGGGAGCAGTAAAT…	AGTGTCATCTTTAAGTCACAACAACCCATTATTTAACTGATTTCTTACTAAATTTTGTACGTTACTAGGGCTGTGACTGATTACTTTCACTGCAAACTGAAACTACAACCGTCTGTATGAGGAACAAGTTACATTTTTTCACTGCTTAAAACAACGGCAGCCGACGGGACATATTTGCACCAGTTCCATCCAGTCCTAACACACACATAACGATTTTTCCAGACACATTTCAACGTTATTACGTGACCATC	AGTGTCATCTTTAAGTCACAACAACCCATTATTTAACTGATTTCTTACTAAATTTTGTACGTTACTAGGGCTGTGACTGATTACTTTCACTGCAAACTGAAACTACAACCGTCTGTATGAGGAACAAGTTACATTTTTTCACTGCTTAAAACAACGGCAGCCGACGGGACATATTTGCACCAGTTCCATCCAGTCCTAACACACACATAACGATTTTTCCAGACACATTTCAACGTTATTACGTGACCATC
R. flavipes	A131	38	93	RfA131b_2	MK295441	MK295569	MK295314	-87.3327	34.4198	21	15	25	S	4,4	ACATCACTTAGAATACTAATTCGAACAGAACTAGGACAACCCGGATCTCTAATTGGAGATGACCAGATCTACAACGTTATCGTTACCGCTCATGCATTCGTCATAATTTTCTTTATGGTCATACCAATCATGATTGGTGGATTTGGAAACTGACTAGTACCACTTATATTAGGAGCCCCAGACATGGCATTCCCACGAATAAACAACATAAGATTTTGATTACTCCCACCATCATTAACATTACTACTTACTAGCAGAACAGTAGAAAGTGGAGCAGGGACAGGATGAACAGTTTACCCCCCTCTTGCGAGAGGTATTGCCCACGCAGGAGCATCCGTAGACTTAGCCATCTTCTCCTTACATCTAGCAGGTGTTTCATCAATTTTGGGAGCAGTAAAT…	TTCTTTCACGATCATACATTAATAATTATATTAATAATCATCACAACCGTTATATACATAATAACCACCCTGCTTTGAAATAAACACACCAGACGATTCATACTAGAAGGACAACTAATTGAAACTACATGAACAATTGCACCAGCAATTATCCTAGTATTCATTGCAATACCATCCTTACGACTTCTATATCTAATAGACGAAATCCACAACCCAACAATAACCCTAAAGGCAGTAGGACATCAATGATACTGAAGATATGAATACTCAGACTTCACAAAATTAGAATTCGACTCTTACATAATCCCACAAGAGGAAAATCAAGCAAGAGCTTTCCGACTACTAGACACAGATAATCGAATTGTACTACCCATAAATTCACCAATCCGACTGGTAGTG…	ACATCACTTAGAATACTAATTCGAACAGAACTAGGACAACCCGGATCTCTAATTGGAGATGACCAGATCTACAACGTTATCGTTACCGCTCATGCATTCGTCATAATTTTCTTTATGGTCATACCAATCATGATTGGTGGATTTGGAAACTGACTAGTACCACTTATATTAGGAGCCCCAGACATGGCATTCCCACGAATAAACAACATAAGATTTTGATTACTCCCACCATCATTAACATTACTACTTACTAGCAGAACAGTAGAAAGTGGAGCAGGGACAGGATGAACAGTTTACCCCCCTCTTGCGAGAGGTATTGCCCACGCAGGAGCATCCGTAGACTTAGCCATCTTCTCCTTACATCTAGCAGGTGTTTCATCAATTTTGGGAGCAGTAAAT…	AGTGTCATCTTTAAGTCACAACAACCCATTATTTAACTGATTTCTTACTAAATTTTGTACGTTACTAGGGCTGTGACTGATTACTTTCACTGCAAACTGAAACTACAACCGTCTGTATGAGGAACAAGTTACATTTTTTCACTGCTTAAAACAACGGCAGCCGACGGGACATATTTGCACCAGTTCCATCCAGTCCTAACACACACATAACGATTTTTCCAGACACATTTCAACGTTATTACGTGACCATC	AGTGTCATCTTTAAGTCACAACAACCCATTATTTAACTGATTTCTTACTAAATTTTGTACGTTACTAGGGCTGTGACTGATTACTTTCACTGCAAACTGAAACTACAACCGTCTGTATGAGGAACAAGTTACATTTTTTCACTGCTTAAAACAACGGCAGCCGACGGGACATATTTGCACCAGTTCCATCCAGTCCTAACACACACATAACGATTTTTCCAGACACATTTCAACGTTATTACGTGACCATC
R. flavipes	A131	38	94	RfA131b_3	MK295442	MK295570	MK295315	-87.3327	34.4198	21	15	25	S	4,4	ACATCACTTAGAATACTAATTCGAACAGAACTAGGACAACCCGGATCTCTAATTGGAGATGACCAGATCTACAACGTTATCGTTACCGCTCATGCATTCGTCATAATTTTCTTTATGGTCATACCAATCATGATTGGTGGATTTGGAAACTGACTAGTACCACTTATATTAGGAGCCCCAGACATGGCATTCCCACGAATAAACAACATAAGATTTTGATTACTCCCACCATCATTAACATTACTACTTACTAGCAGAACAGTAGAAAGTGGAGCAGGGACAGGATGAACAGTTTACCCCCCTCTTGCGAGAGGTATTGCCCACGCAGGAGCATCCGTAGACTTAGCCATCTTCTCCTTACATCTAGCAGGTGTTTCATCAATTTTGGGAGCAGTAAAT…	TTCTTTCACGATCATACATTAATAATTATATTAATAATCATCACAACCGTTATATACATAATAACCACCCTGCTTTGAAATAAACACACCAGACGATTCATACTAGAAGGACAACTAATTGAAACTACATGAACAATTGCACCAGCAATTATCCTAGTATTCATTGCAATACCATCCTTACGACTTCTATATCTAATAGACGAAATCCACAACCCAACAATAACCCTAAAGGCAGTAGGACATCAATGATACTGAAGATATGAATACTCAGACTTCACAAAATTAGAATTCGACTCTTACATAATCCCACAAGAGGAAAATCAAGCAAGAGCTTTCCGACTACTAGACACAGATAATCGAATTGTACTACCCATAAATTCACCAATCCGACTGGTAGTG…	ACATCACTTAGAATACTAATTCGAACAGAACTAGGACAACCCGGATCTCTAATTGGAGATGACCAGATCTACAACGTTATCGTTACCGCTCATGCATTCGTCATAATTTTCTTTATGGTCATACCAATCATGATTGGTGGATTTGGAAACTGACTAGTACCACTTATATTAGGAGCCCCAGACATGGCATTCCCACGAATAAACAACATAAGATTTTGATTACTCCCACCATCATTAACATTACTACTTACTAGCAGAACAGTAGAAAGTGGAGCAGGGACAGGATGAACAGTTTACCCCCCTCTTGCGAGAGGTATTGCCCACGCAGGAGCATCCGTAGACTTAGCCATCTTCTCCTTACATCTAGCAGGTGTTTCATCAATTTTGGGAGCAGTAAAT…	AGTGTCATCTTTAAGTCACAACAACCCATTATTTAACTGATTTCTTACTAAATTTTGTACGTTACTAGGGCTGTGACTGATTACTTTCACTGCAAACTGAAACTACAACCGTCTGTATGAGGAACAAGTTACATTTTTTCACTGCTTAAAACAACGGCAGCCGACGGGACATATTTGCACCAGTTCCATCCAGTCCTAACACACACATAACGATTTTTCCAGACACATTTCAACGTTATTACGTGACCATC	AGTGTCATCTTTAAGTCACAACAACCCATTATTTAACTGATTTCTTACTAAATTTTGTACGTTACTAGGGCTGTGACTGATTACTTTCACTGCAAACTGAAACTACAACCGTCTGTATGAGGAACAAGTTACATTTTTTCACTGCTTAAAACAACGGCAGCCGACGGGACATATTTGCACCAGTTCCATCCAGTCCTAACACACACATAACGATTTTTCCAGACACATTTCAACGTTATTACGTGACCATC
R. flavipes	A133	39	95	RfA133b_1	MK295443	MK295571	MK295316	-87.2768	34.1766	22	16	26	S	1,3	ACATCACTTAGAATACTAATTCGAACAGAACTAGGGCAACCCGGATCTCTAATTGGAGATGACCAGATCTATAACGTCATCGTTACTGCTCATGCATTCGTCATAATTTTCTTTATGGTCATACCAATCATGATTGGTGGATTCGGAAACTGACTAGTACCACTTATATTAGGGGCCCCAGACATAGCATTCCCACGAATAAACAACATAAGATTTTGATTACTCCCACCATCATTAACACTACTACTTACTAGCAGAACAGTAGAAAGTGGAGCAGGGACAGGATGAACAGTTTACCCCCCTCTTGCGAGAGGTATTGCCCATGCAGGAGCATCCGTAGACTTAGCCATCTTCTCCTTACATCTAGCAGGTGTTTCATCAATTTTGGGAGCAGTAAAT…	TTCTTCCACGATCATACATTAATAATCATATTAATAATCATCACAACCGTTATATACATAATAACCACCCTACTTTGAAATAAACACACCAGACGATTCATACTAGAAGGACAACTAATTGAAACTACATGAACAATTGCACCAGCAATCATCCTAGTATTCATTGCAATACCATCCTTACGACTTCTATATCTAATAGACGAAATCCACAACCCAACAATAACCCTAAAGGCAGTAGGACATCAATGATACTGAAGATATGAATACTCAGACTTCACAAAATTAGAATTCGACTCTTACATAATCCCACAAGAGGAAAATCAAGCAAGAACTTTCCGACTACTAGACACAGATAATCGAATTGTACTACCCATAAATTCACCAATCCGACTGGTAGTG…	ACATCACTTAGAATACTAATTCGAACAGAACTAGGGCAACCCGGATCTCTAATTGGAGATGACCAGATCTATAACGTCATCGTTACTGCTCATGCATTCGTCATAATTTTCTTTATGGTCATACCAATCATGATTGGTGGATTCGGAAACTGACTAGTACCACTTATATTAGGGGCCCCAGACATAGCATTCCCACGAATAAACAACATAAGATTTTGATTACTCCCACCATCATTAACACTACTACTTACTAGCAGAACAGTAGAAAGTGGAGCAGGGACAGGATGAACAGTTTACCCCCCTCTTGCGAGAGGTATTGCCCATGCAGGAGCATCCGTAGACTTAGCCATCTTCTCCTTACATCTAGCAGGTGTTTCATCAATTTTGGGAGCAGTAAAT…	AGTGTCATCTTTAAGTCACAACAACCCATTATTTAACTGATTTCTTACTAAATTTTGTACGTTACTAGGGCTGTGACTGATTACTTTCACTGCAAACTGAAACTACAACCGTCTGTATGAGGAACAAGTTACATTTTTTCACTGCTTAAAACAACGGCAGCCGAAGGGACATATTTGCACCAGTTCCATCCAGTCCAAACACACACATAACGATTTATCCAGACACATATCAACGTTATTACGTGACCATC	AGTGTCATCTTTAAGTCACAACAACCCATTATTTAACTGATTTCTTACTAAATTTTGTACGTTACTAGGGCTGTGACTGATTACTTTCACTGCAAACTGAAACTACAACCGTCTGTATGAGGAACAAGTTACATTTTTTCACTGCTTAAAACAACGGCAGCCGACGGGACATATTTGCACCAGTTCCATCCAGTCCAAACACACACATAACGATTTTTCCAGACACATTTCAACGTTATTACGTGACCATC
R. flavipes	A133	39	96	RfA133b_2	MK295444	MK295572	MK295317	-87.2768	34.1766	22	16	26	S	1,3	ACATCACTTAGAATACTAATTCGAACAGAACTAGGGCAACCCGGATCTCTAATTGGAGATGACCAGATCTATAACGTCATCGTTACTGCTCATGCATTCGTCATAATTTTCTTTATGGTCATACCAATCATGATTGGTGGATTCGGAAACTGACTAGTACCACTTATATTAGGGGCCCCAGACATAGCATTCCCACGAATAAACAACATAAGATTTTGATTACTCCCACCATCATTAACACTACTACTTACTAGCAGAACAGTAGAAAGTGGAGCAGGGACAGGATGAACAGTTTACCCCCCTCTTGCGAGAGGTATTGCCCATGCAGGAGCATCCGTAGACTTAGCCATCTTCTCCTTACATCTAGCAGGTGTTTCATCAATTTTGGGAGCAGTAAAT…	TTCTTCCACGATCATACATTAATAATCATATTAATAATCATCACAACCGTTATATACATAATAACCACCCTACTTTGAAATAAACACACCAGACGATTCATACTAGAAGGACAACTAATTGAAACTACATGAACAATTGCACCAGCAATCATCCTAGTATTCATTGCAATACCATCCTTACGACTTCTATATCTAATAGACGAAATCCACAACCCAACAATAACCCTAAAGGCAGTAGGACATCAATGATACTGAAGATATGAATACTCAGACTTCACAAAATTAGAATTCGACTCTTACATAATCCCACAAGAGGAAAATCAAGCAAGAACTTTCCGACTACTAGACACAGATAATCGAATTGTACTACCCATAAATTCACCAATCCGACTGGTAGTG…	ACATCACTTAGAATACTAATTCGAACAGAACTAGGGCAACCCGGATCTCTAATTGGAGATGACCAGATCTATAACGTCATCGTTACTGCTCATGCATTCGTCATAATTTTCTTTATGGTCATACCAATCATGATTGGTGGATTCGGAAACTGACTAGTACCACTTATATTAGGGGCCCCAGACATAGCATTCCCACGAATAAACAACATAAGATTTTGATTACTCCCACCATCATTAACACTACTACTTACTAGCAGAACAGTAGAAAGTGGAGCAGGGACAGGATGAACAGTTTACCCCCCTCTTGCGAGAGGTATTGCCCATGCAGGAGCATCCGTAGACTTAGCCATCTTCTCCTTACATCTAGCAGGTGTTTCATCAATTTTGGGAGCAGTAAAT…	AGTGTCATCTTTAAGTCACAACAACCCATTATTTAACTGATTTCTTACTAAATTTTGTACGTTACTAGGGCTGTGACTGATTACTTTCACTGCAAACTGAAACTACAACCGTCTGTATGAGGAACAAGTTACATTTTTTCACTGCTTAAAACAACGGCAGCCGAAGGGACATATTTGCACCAGTTCCATCCAGTCCAAACACACACATAACGATTTATCCAGACACATATCAACGTTATTACGTGACCATC	AGTGTCATCTTTAAGTCACAACAACCCATTATTTAACTGATTTCTTACTAAATTTTGTACGTTACTAGGGCTGTGACTGATTACTTTCACTGCAAACTGAAACTACAACCGTCTGTATGAGGAACAAGTTACATTTTTTCACTGCTTAAAACAACGGCAGCCGACGGGACATATTTGCACCAGTTCCATCCAGTCCAAACACACACATAACGATTTTTCCAGACACATTTCAACGTTATTACGTGACCATC
R. flavipes	A133	39	97	RfA133b_3	MK295445	MK295573	MK295318	-87.2768	34.1766	22	16	26	S	1,3	ACATCACTTAGAATACTAATTCGAACAGAACTAGGGCAACCCGGATCTCTAATTGGAGATGACCAGATCTATAACGTCATCGTTACTGCTCATGCATTCGTCATAATTTTCTTTATGGTCATACCAATCATGATTGGTGGATTCGGAAACTGACTAGTACCACTTATATTAGGGGCCCCAGACATAGCATTCCCACGAATAAACAACATAAGATTTTGATTACTCCCACCATCATTAACACTACTACTTACTAGCAGAACAGTAGAAAGTGGAGCAGGGACAGGATGAACAGTTTACCCCCCTCTTGCGAGAGGTATTGCCCATGCAGGAGCATCCGTAGACTTAGCCATCTTCTCCTTACATCTAGCAGGTGTTTCATCAATTTTGGGAGCAGTAAAT…	TTCTTCCACGATCATACATTAATAATCATATTAATAATCATCACAACCGTTATATACATAATAACCACCCTACTTTGAAATAAACACACCAGACGATTCATACTAGAAGGACAACTAATTGAAACTACATGAACAATTGCACCAGCAATCATCCTAGTATTCATTGCAATACCATCCTTACGACTTCTATATCTAATAGACGAAATCCACAACCCAACAATAACCCTAAAGGCAGTAGGACATCAATGATACTGAAGATATGAATACTCAGACTTCACAAAATTAGAATTCGACTCTTACATAATCCCACAAGAGGAAAATCAAGCAAGAACTTTCCGACTACTAGACACAGATAATCGAATTGTACTACCCATAAATTCACCAATCCGACTGGTAGTG…	ACATCACTTAGAATACTAATTCGAACAGAACTAGGGCAACCCGGATCTCTAATTGGAGATGACCAGATCTATAACGTCATCGTTACTGCTCATGCATTCGTCATAATTTTCTTTATGGTCATACCAATCATGATTGGTGGATTCGGAAACTGACTAGTACCACTTATATTAGGGGCCCCAGACATAGCATTCCCACGAATAAACAACATAAGATTTTGATTACTCCCACCATCATTAACACTACTACTTACTAGCAGAACAGTAGAAAGTGGAGCAGGGACAGGATGAACAGTTTACCCCCCTCTTGCGAGAGGTATTGCCCATGCAGGAGCATCCGTAGACTTAGCCATCTTCTCCTTACATCTAGCAGGTGTTTCATCAATTTTGGGAGCAGTAAAT…	AGTGTCATCTTTAAGTCACAACAACCCATTATTTAACTGATTTCTTACTAAATTTTGTACGTTACTAGGGCTGTGACTGATTACTTTCACTGCAAACTGAAACTACAACCGTCTGTATGAGGAACAAGTTACATTTTTTCACTGCTTAAAACAACGGCAGCCGAAGGGACATATTTGCACCAGTTCCATCCAGTCCAAACACACACATAACGATTTATCCAGACACATATCAACGTTATTACGTGACCATC	AGTGTCATCTTTAAGTCACAACAACCCATTATTTAACTGATTTCTTACTAAATTTTGTACGTTACTAGGGCTGTGACTGATTACTTTCACTGCAAACTGAAACTACAACCGTCTGTATGAGGAACAAGTTACATTTTTTCACTGCTTAAAACAACGGCAGCCGACGGGACATATTTGCACCAGTTCCATCCAGTCCAAACACACACATAACGATTTTTCCAGACACATTTCAACGTTATTACGTGACCATC
R. flavipes	A134	40	98	RfA134_1	MK295446	MK295574	MK295319	-85.5836	34.4554	23	17	27	C	1,3	ACATCACTTAGAATACTAATTCGAACAGAACTAGGGCAACCCGGATCTCTAATTGGAGATGACCAGATCTACAACGTTATCGTTACTGCTCATGCATTCGTCATAATTTTCTTTATAGTCATACCAATCATGATTGGTGGATTCGGAAACTGATTAGTACCACTTATATTAGGAGCCCCAGACATGGCATTCCCACGAATAAACAACATAAGATTTTGATTACTCCCACCGTCATTAACATTATTACTTACTAGCAGAACAGTAGAAAGTGGAGCAGGGACAGGATGAACAGTCTACCCCCCTCTTGCGAGAGGTATTGCCCATGCAGGAGCATCCGTAGACTTAGCCATCTTCTCCTTACATCTAGCAGGTGTTTCATCAATTTTGGGAGCAGTAAAT…	TTCTTCCACGATCATACATTAATAATTATATTAATAATCATCACAACCGTTATATACATGATAACCACCCTACTTTGAAACAAACATACTAGACGATTCATACTAGAAGGACAACTAATTGAAACTACATGAACAATTGCACCAGCAATTATCTTAGTATTCATTGCAATACCATCCTTACGACTTCTATATCTAATAGACGAAATCCACAACCCAACAATAACCCTAAAAGCAGTGGGACATCAATGATACTGAAGATATGAATATTCAGACTTCACAAAATTAGAATTTGACTCTTACATAATCCCACAAGAGGAAAATCAAGCAAGAACTTTTCGACTACTAGACACAGATAATCGAATTGTACTACCCATAAATTCACCAATCCGACTAGTAGTG…	ACATCACTTAGAATACTAATTCGAACAGAACTAGGGCAACCCGGATCTCTAATTGGAGATGACCAGATCTACAACGTTATCGTTACTGCTCATGCATTCGTCATAATTTTCTTTATAGTCATACCAATCATGATTGGTGGATTCGGAAACTGATTAGTACCACTTATATTAGGAGCCCCAGACATGGCATTCCCACGAATAAACAACATAAGATTTTGATTACTCCCACCGTCATTAACATTATTACTTACTAGCAGAACAGTAGAAAGTGGAGCAGGGACAGGATGAACAGTCTACCCCCCTCTTGCGAGAGGTATTGCCCATGCAGGAGCATCCGTAGACTTAGCCATCTTCTCCTTACATCTAGCAGGTGTTTCATCAATTTTGGGAGCAGTAAAT…	AGTGTCATCTTTAAGTCACAACAACCCATTATTTAACTGATTTCTTACTAAATTTTGTACGTTACTAGGGCTGTGACTGATTACTTTCACTGCAAACTGAAACTACAACCGTCTGTATGAGGAACAAGTTACATTTTTTCACTGCTTAAAACAACGGCAGCCGAAGGGACATATTTGCACCAGTTCCATCCAGTCCAAACACACACATAACGATTTATCCAGACACATATCAACGTTATTACGTGACCATC	AGTGTCATCTTTAAGTCACAACAACCCATTATTTAACTGATTTCTTACTAAATTTTGTACGTTACTAGGGCTGTGACTGATTACTTTCACTGCAAACTGAAACTACAACCGTCTGTATGAGGAACAAGTTACATTTTTTCACTGCTTAAAACAACGGCAGCCGACGGGACATATTTGCACCAGTTCCATCCAGTCCAAACACACACATAACGATTTTTCCAGACACATTTCAACGTTATTACGTGACCATC
R. flavipes	A134	40	99	RfA134_2	MK295447	MK295575	MK295320	-85.5836	34.4554	23	17	27	C	1,3	ACATCACTTAGAATACTAATTCGAACAGAACTAGGGCAACCCGGATCTCTAATTGGAGATGACCAGATCTACAACGTTATCGTTACTGCTCATGCATTCGTCATAATTTTCTTTATAGTCATACCAATCATGATTGGTGGATTCGGAAACTGATTAGTACCACTTATATTAGGAGCCCCAGACATGGCATTCCCACGAATAAACAACATAAGATTTTGATTACTCCCACCGTCATTAACATTATTACTTACTAGCAGAACAGTAGAAAGTGGAGCAGGGACAGGATGAACAGTCTACCCCCCTCTTGCGAGAGGTATTGCCCATGCAGGAGCATCCGTAGACTTAGCCATCTTCTCCTTACATCTAGCAGGTGTTTCATCAATTTTGGGAGCAGTAAAT…	TTCTTCCACGATCATACATTAATAATTATATTAATAATCATCACAACCGTTATATACATGATAACCACCCTACTTTGAAACAAACATACTAGACGATTCATACTAGAAGGACAACTAATTGAAACTACATGAACAATTGCACCAGCAATTATCTTAGTATTCATTGCAATACCATCCTTACGACTTCTATATCTAATAGACGAAATCCACAACCCAACAATAACCCTAAAAGCAGTGGGACATCAATGATACTGAAGATATGAATATTCAGACTTCACAAAATTAGAATTTGACTCTTACATAATCCCACAAGAGGAAAATCAAGCAAGAACTTTTCGACTACTAGACACAGATAATCGAATTGTACTACCCATAAATTCACCAATCCGACTAGTAGTG…	ACATCACTTAGAATACTAATTCGAACAGAACTAGGGCAACCCGGATCTCTAATTGGAGATGACCAGATCTACAACGTTATCGTTACTGCTCATGCATTCGTCATAATTTTCTTTATAGTCATACCAATCATGATTGGTGGATTCGGAAACTGATTAGTACCACTTATATTAGGAGCCCCAGACATGGCATTCCCACGAATAAACAACATAAGATTTTGATTACTCCCACCGTCATTAACATTATTACTTACTAGCAGAACAGTAGAAAGTGGAGCAGGGACAGGATGAACAGTCTACCCCCCTCTTGCGAGAGGTATTGCCCATGCAGGAGCATCCGTAGACTTAGCCATCTTCTCCTTACATCTAGCAGGTGTTTCATCAATTTTGGGAGCAGTAAAT…	AGTGTCATCTTTAAGTCACAACAACCCATTATTTAACTGATTTCTTACTAAATTTTGTACGTTACTAGGGCTGTGACTGATTACTTTCACTGCAAACTGAAACTACAACCGTCTGTATGAGGAACAAGTTACATTTTTTCACTGCTTAAAACAACGGCAGCCGAAGGGACATATTTGCACCAGTTCCATCCAGTCCAAACACACACATAACGATTTATCCAGACACATATCAACGTTATTACGTGACCATC	AGTGTCATCTTTAAGTCACAACAACCCATTATTTAACTGATTTCTTACTAAATTTTGTACGTTACTAGGGCTGTGACTGATTACTTTCACTGCAAACTGAAACTACAACCGTCTGTATGAGGAACAAGTTACATTTTTTCACTGCTTAAAACAACGGCAGCCGACGGGACATATTTGCACCAGTTCCATCCAGTCCAAACACACACATAACGATTTTTCCAGACACATTTCAACGTTATTACGTGACCATC
R. flavipes	A134	40	100	RfA134_3	MK295448	MK295576	MK295321	-85.5836	34.4554	23	17	27	C	1,3	ACATCACTTAGAATACTAATTCGAACAGAACTAGGGCAACCCGGATCTCTAATTGGAGATGACCAGATCTACAACGTTATCGTTACTGCTCATGCATTCGTCATAATTTTCTTTATAGTCATACCAATCATGATTGGTGGATTCGGAAACTGATTAGTACCACTTATATTAGGAGCCCCAGACATGGCATTCCCACGAATAAACAACATAAGATTTTGATTACTCCCACCGTCATTAACATTATTACTTACTAGCAGAACAGTAGAAAGTGGAGCAGGGACAGGATGAACAGTCTACCCCCCTCTTGCGAGAGGTATTGCCCATGCAGGAGCATCCGTAGACTTAGCCATCTTCTCCTTACATCTAGCAGGTGTTTCATCAATTTTGGGAGCAGTAAAT…	TTCTTCCACGATCATACATTAATAATTATATTAATAATCATCACAACCGTTATATACATGATAACCACCCTACTTTGAAACAAACATACTAGACGATTCATACTAGAAGGACAACTAATTGAAACTACATGAACAATTGCACCAGCAATTATCTTAGTATTCATTGCAATACCATCCTTACGACTTCTATATCTAATAGACGAAATCCACAACCCAACAATAACCCTAAAAGCAGTGGGACATCAATGATACTGAAGATATGAATATTCAGACTTCACAAAATTAGAATTTGACTCTTACATAATCCCACAAGAGGAAAATCAAGCAAGAACTTTTCGACTACTAGACACAGATAATCGAATTGTACTACCCATAAATTCACCAATCCGACTAGTAGTG…	ACATCACTTAGAATACTAATTCGAACAGAACTAGGGCAACCCGGATCTCTAATTGGAGATGACCAGATCTACAACGTTATCGTTACTGCTCATGCATTCGTCATAATTTTCTTTATAGTCATACCAATCATGATTGGTGGATTCGGAAACTGATTAGTACCACTTATATTAGGAGCCCCAGACATGGCATTCCCACGAATAAACAACATAAGATTTTGATTACTCCCACCGTCATTAACATTATTACTTACTAGCAGAACAGTAGAAAGTGGAGCAGGGACAGGATGAACAGTCTACCCCCCTCTTGCGAGAGGTATTGCCCATGCAGGAGCATCCGTAGACTTAGCCATCTTCTCCTTACATCTAGCAGGTGTTTCATCAATTTTGGGAGCAGTAAAT…	AGTGTCATCTTTAAGTCACAACAACCCATTATTTAACTGATTTCTTACTAAATTTTGTACGTTACTAGGGCTGTGACTGATTACTTTCACTGCAAACTGAAACTACAACCGTCTGTATGAGGAACAAGTTACATTTTTTCACTGCTTAAAACAACGGCAGCCGAAGGGACATATTTGCACCAGTTCCATCCAGTCCAAACACACACATAACGATTTATCCAGACACATATCAACGTTATTACGTGACCATC	AGTGTCATCTTTAAGTCACAACAACCCATTATTTAACTGATTTCTTACTAAATTTTGTACGTTACTAGGGCTGTGACTGATTACTTTCACTGCAAACTGAAACTACAACCGTCTGTATGAGGAACAAGTTACATTTTTTCACTGCTTAAAACAACGGCAGCCGACGGGACATATTTGCACCAGTTCCATCCAGTCCAAACACACACATAACGATTTTTCCAGACACATTTCAACGTTATTACGTGACCATC
R. flavipes	A137	41	101	RfA137_1	MK295449	MK295577	MK295322	-85.4573	33.9634	2	2	2	C	1,2	ACATCACTTAGAATACTAATTCGAACAGAACTAGGGCAACCCGGATCTCTAATTGGAGATGACCAGATCTACAACGTTATCGTTACTGCTCATGCATTCGTCATAATTTTCTTTATGGTCATACCAATCATGATTGGTGGATTCGGAAACTGATTAGTACCACTTATATTAGGAGCCCCAGACATGGCATTCCCACGAATAAACAACATAAGATTTTGATTACTCCCACCGTCATTAACATTACTACTTACTAGCAGAACAGTAGAAAGTGGAGCAGGGACAGGATGAACAGTCTACCCCCCTCTTGCGAGAGGTATTGCCCATGCAGGAGCATCCGTAGACTTAGCCATCTTCTCCTTACATCTAGCAGGTGTTTCATCAATTTTGGGAGCAGTAAAT…	TTCTTCCACGATCATACATTAATAATTATATTAATAATCATCACAACCGTTATATACATGATAACCACCCTACTTTGAAATAAACATACTAGACGATTCATGCTAGAAGGACAACTAATTGAAACTACATGAACAATTGCACCAGCAATTATCTTAGTATTCATTGCAATACCATCCTTACGACTTCTATATCTAATAGACGAAATCCACAACCCAACAATAACCCTAAAAGCAGTGGGACATCAATGATACTGAAGATATGAATATTCAGACTTCACAAAATTAGAATTCGACTCTTACATAATCCCACAAGAGGAAAATCAAGCAAGAACTTTCCGACTACTAGACACAGATAATCGAATTGTACTACCCATAAATTCACCAATCCGACTAGTAGTG…	ACATCACTTAGAATACTAATTCGAACAGAACTAGGGCAACCCGGATCTCTAATTGGAGATGACCAGATCTACAACGTTATCGTTACTGCTCATGCATTCGTCATAATTTTCTTTATGGTCATACCAATCATGATTGGTGGATTCGGAAACTGATTAGTACCACTTATATTAGGAGCCCCAGACATGGCATTCCCACGAATAAACAACATAAGATTTTGATTACTCCCACCGTCATTAACATTACTACTTACTAGCAGAACAGTAGAAAGTGGAGCAGGGACAGGATGAACAGTCTACCCCCCTCTTGCGAGAGGTATTGCCCATGCAGGAGCATCCGTAGACTTAGCCATCTTCTCCTTACATCTAGCAGGTGTTTCATCAATTTTGGGAGCAGTAAAT…	AGTGTCATCTTTAAGTCACAACAACCCATTATTTAACTGATTTCTTACTAAATTTTGTACGTTACTAGGGCTGTGACTGATTACTTTCACTGCAAACTGAAACTACAACCGTCTGTATGAGGAACAAGTTACATTTTTTCACTGCTTAAAACAACGGCAGCCGAAGGGACATATTTGCACCAGTTCCATCCAGTCCAAACACACACATAACGATTTATCCAGACACATATCAACGTTATTACGTGACCATC	AGTGTCATCTTTAAGTCACAACAACCCATTATTTAACTGATTTCTTACTAAATTTTGTACGTTACTAGGGCTGTGACTGATTACTTTCACTGCAAACTGAAACTACAACCGTCTGTATGAGGAACAAGTTACATTTTTTCACTGCTTAAAACAACGGCAGCCGAAGGGACATATTTGCACCAGTTCCATCCAGTCCAAACACACACATAACGATTTTTCCAGACACATTTCAACGTTATTACGTGACCATC
R. flavipes	A137	41	102	RfA137_2	MK295450	MK295578	MK295323	-85.4573	33.9634	2	2	2	C	1,2	ACATCACTTAGAATACTAATTCGAACAGAACTAGGGCAACCCGGATCTCTAATTGGAGATGACCAGATCTACAACGTTATCGTTACTGCTCATGCATTCGTCATAATTTTCTTTATGGTCATACCAATCATGATTGGTGGATTCGGAAACTGATTAGTACCACTTATATTAGGAGCCCCAGACATGGCATTCCCACGAATAAACAACATAAGATTTTGATTACTCCCACCGTCATTAACATTACTACTTACTAGCAGAACAGTAGAAAGTGGAGCAGGGACAGGATGAACAGTCTACCCCCCTCTTGCGAGAGGTATTGCCCATGCAGGAGCATCCGTAGACTTAGCCATCTTCTCCTTACATCTAGCAGGTGTTTCATCAATTTTGGGAGCAGTAAAT…	TTCTTCCACGATCATACATTAATAATTATATTAATAATCATCACAACCGTTATATACATGATAACCACCCTACTTTGAAATAAACATACTAGACGATTCATGCTAGAAGGACAACTAATTGAAACTACATGAACAATTGCACCAGCAATTATCTTAGTATTCATTGCAATACCATCCTTACGACTTCTATATCTAATAGACGAAATCCACAACCCAACAATAACCCTAAAAGCAGTGGGACATCAATGATACTGAAGATATGAATATTCAGACTTCACAAAATTAGAATTCGACTCTTACATAATCCCACAAGAGGAAAATCAAGCAAGAACTTTCCGACTACTAGACACAGATAATCGAATTGTACTACCCATAAATTCACCAATCCGACTAGTAGTG…	ACATCACTTAGAATACTAATTCGAACAGAACTAGGGCAACCCGGATCTCTAATTGGAGATGACCAGATCTACAACGTTATCGTTACTGCTCATGCATTCGTCATAATTTTCTTTATGGTCATACCAATCATGATTGGTGGATTCGGAAACTGATTAGTACCACTTATATTAGGAGCCCCAGACATGGCATTCCCACGAATAAACAACATAAGATTTTGATTACTCCCACCGTCATTAACATTACTACTTACTAGCAGAACAGTAGAAAGTGGAGCAGGGACAGGATGAACAGTCTACCCCCCTCTTGCGAGAGGTATTGCCCATGCAGGAGCATCCGTAGACTTAGCCATCTTCTCCTTACATCTAGCAGGTGTTTCATCAATTTTGGGAGCAGTAAAT…	AGTGTCATCTTTAAGTCACAACAACCCATTATTTAACTGATTTCTTACTAAATTTTGTACGTTACTAGGGCTGTGACTGATTACTTTCACTGCAAACTGAAACTACAACCGTCTGTATGAGGAACAAGTTACATTTTTTCACTGCTTAAAACAACGGCAGCCGAAGGGACATATTTGCACCAGTTCCATCCAGTCCAAACACACACATAACGATTTATCCAGACACATATCAACGTTATTACGTGACCATC	AGTGTCATCTTTAAGTCACAACAACCCATTATTTAACTGATTTCTTACTAAATTTTGTACGTTACTAGGGCTGTGACTGATTACTTTCACTGCAAACTGAAACTACAACCGTCTGTATGAGGAACAAGTTACATTTTTTCACTGCTTAAAACAACGGCAGCCGAAGGGACATATTTGCACCAGTTCCATCCAGTCCAAACACACACATAACGATTTTTCCAGACACATTTCAACGTTATTACGTGACCATC
R. flavipes	A137	41	103	RfA137_3	MK295451	MK295579	MK295324	-85.4573	33.9634	2	2	2	C	1,2	ACATCACTTAGAATACTAATTCGAACAGAACTAGGGCAACCCGGATCTCTAATTGGAGATGACCAGATCTACAACGTTATCGTTACTGCTCATGCATTCGTCATAATTTTCTTTATGGTCATACCAATCATGATTGGTGGATTCGGAAACTGATTAGTACCACTTATATTAGGAGCCCCAGACATGGCATTCCCACGAATAAACAACATAAGATTTTGATTACTCCCACCGTCATTAACATTACTACTTACTAGCAGAACAGTAGAAAGTGGAGCAGGGACAGGATGAACAGTCTACCCCCCTCTTGCGAGAGGTATTGCCCATGCAGGAGCATCCGTAGACTTAGCCATCTTCTCCTTACATCTAGCAGGTGTTTCATCAATTTTGGGAGCAGTAAAT…	TTCTTCCACGATCATACATTAATAATTATATTAATAATCATCACAACCGTTATATACATGATAACCACCCTACTTTGAAATAAACATACTAGACGATTCATGCTAGAAGGACAACTAATTGAAACTACATGAACAATTGCACCAGCAATTATCTTAGTATTCATTGCAATACCATCCTTACGACTTCTATATCTAATAGACGAAATCCACAACCCAACAATAACCCTAAAAGCAGTGGGACATCAATGATACTGAAGATATGAATATTCAGACTTCACAAAATTAGAATTCGACTCTTACATAATCCCACAAGAGGAAAATCAAGCAAGAACTTTCCGACTACTAGACACAGATAATCGAATTGTACTACCCATAAATTCACCAATCCGACTAGTAGTG…	ACATCACTTAGAATACTAATTCGAACAGAACTAGGGCAACCCGGATCTCTAATTGGAGATGACCAGATCTACAACGTTATCGTTACTGCTCATGCATTCGTCATAATTTTCTTTATGGTCATACCAATCATGATTGGTGGATTCGGAAACTGATTAGTACCACTTATATTAGGAGCCCCAGACATGGCATTCCCACGAATAAACAACATAAGATTTTGATTACTCCCACCGTCATTAACATTACTACTTACTAGCAGAACAGTAGAAAGTGGAGCAGGGACAGGATGAACAGTCTACCCCCCTCTTGCGAGAGGTATTGCCCATGCAGGAGCATCCGTAGACTTAGCCATCTTCTCCTTACATCTAGCAGGTGTTTCATCAATTTTGGGAGCAGTAAAT…	AGTGTCATCTTTAAGTCACAACAACCCATTATTTAACTGATTTCTTACTAAATTTTGTACGTTACTAGGGCTGTGACTGATTACTTTCACTGCAAACTGAAACTACAACCGTCTGTATGAGGAACAAGTTACATTTTTTCACTGCTTAAAACAACGGCAGCCGAAGGGACATATTTGCACCAGTTCCATCCAGTCCAAACACACACATAACGATTTATCCAGACACATATCAACGTTATTACGTGACCATC	AGTGTCATCTTTAAGTCACAACAACCCATTATTTAACTGATTTCTTACTAAATTTTGTACGTTACTAGGGCTGTGACTGATTACTTTCACTGCAAACTGAAACTACAACCGTCTGTATGAGGAACAAGTTACATTTTTTCACTGCTTAAAACAACGGCAGCCGAAGGGACATATTTGCACCAGTTCCATCCAGTCCAAACACACACATAACGATTTTTCCAGACACATTTCAACGTTATTACGTGACCATC
R. flavipes	A138	42	104	RfA138_1	MK295452	MK295580	MK295325	-85.8468	34.1468	1	5	6	C	1,3	ACATCACTTAGAATACTAATTCGAACAGAACTAGGGCAACCCGGATCTCTAATTGGAGATGACCAGATCTACAACGTTATCGTTACTGCTCATGCATTCGTCATAATTTTCTTTATAGTCATACCAATCATGATTGGTGGATTCGGAAACTGATTAGTACCACTTATATTAGGAGCCCCAGACATGGCATTCCCACGAATAAACAACATAAGATTTTGATTACTCCCACCGTCATTAACATTACTACTTACTAGCAGAACAGTAGAAAGTGGAGCAGGGACAGGATGAACAGTCTACCCCCCTCTTGCGAGAGGTATTGCCCATGCAGGAGCATCCGTAGACTTAGCCATCTTCTCCTTACATCTAGCAGGTGTTTCATCAATTTTGGGAGCAGTAAAT…	TTCTTCCACGATCATACATTAATAATTATATTAATAATCATCACAACCGTTATATACATGATAACCACCCTACTTTGAAATAAACATACTAGACGATTCATACTAGAAGGACAACTAATTGAAACTACATGAACAATTGCACCAGCAATTATCTTAGTATTCATTGCAATACCATCCTTACGACTTCTATATCTAATAGACGAAATCCACAACCCAACAATAACCCTAAAAGCAGTGGGACATCAATGATACTGAAGATATGAATATTCAGACTTCACAAAATTAGAATTCGACTCTTACATAATCCCACAAGAGGAAAATCAAGCAAGAACTTTCCGACTACTAGACACAGATAATCGAATTGTACTACCCATAAATTCACCAATCCGACTAGTAGTG…	ACATCACTTAGAATACTAATTCGAACAGAACTAGGGCAACCCGGATCTCTAATTGGAGATGACCAGATCTACAACGTTATCGTTACTGCTCATGCATTCGTCATAATTTTCTTTATAGTCATACCAATCATGATTGGTGGATTCGGAAACTGATTAGTACCACTTATATTAGGAGCCCCAGACATGGCATTCCCACGAATAAACAACATAAGATTTTGATTACTCCCACCGTCATTAACATTACTACTTACTAGCAGAACAGTAGAAAGTGGAGCAGGGACAGGATGAACAGTCTACCCCCCTCTTGCGAGAGGTATTGCCCATGCAGGAGCATCCGTAGACTTAGCCATCTTCTCCTTACATCTAGCAGGTGTTTCATCAATTTTGGGAGCAGTAAAT…	AGTGTCATCTTTAAGTCACAACAACCCATTATTTAACTGATTTCTTACTAAATTTTGTACGTTACTAGGGCTGTGACTGATTACTTTCACTGCAAACTGAAACTACAACCGTCTGTATGAGGAACAAGTTACATTTTTTCACTGCTTAAAACAACGGCAGCCGAAGGGACATATTTGCACCAGTTCCATCCAGTCCAAACACACACATAACGATTTATCCAGACACATATCAACGTTATTACGTGACCATC	AGTGTCATCTTTAAGTCACAACAACCCATTATTTAACTGATTTCTTACTAAATTTTGTACGTTACTAGGGCTGTGACTGATTACTTTCACTGCAAACTGAAACTACAACCGTCTGTATGAGGAACAAGTTACATTTTTTCACTGCTTAAAACAACGGCAGCCGACGGGACATATTTGCACCAGTTCCATCCAGTCCAAACACACACATAACGATTTTTCCAGACACATTTCAACGTTATTACGTGACCATC
R. flavipes	A138	42	105	RfA138_2	MK295453	MK295581	MK295326	-85.8468	34.1468	1	5	6	C	1,3	ACATCACTTAGAATACTAATTCGAACAGAACTAGGGCAACCCGGATCTCTAATTGGAGATGACCAGATCTACAACGTTATCGTTACTGCTCATGCATTCGTCATAATTTTCTTTATAGTCATACCAATCATGATTGGTGGATTCGGAAACTGATTAGTACCACTTATATTAGGAGCCCCAGACATGGCATTCCCACGAATAAACAACATAAGATTTTGATTACTCCCACCGTCATTAACATTACTACTTACTAGCAGAACAGTAGAAAGTGGAGCAGGGACAGGATGAACAGTCTACCCCCCTCTTGCGAGAGGTATTGCCCATGCAGGAGCATCCGTAGACTTAGCCATCTTCTCCTTACATCTAGCAGGTGTTTCATCAATTTTGGGAGCAGTAAAT…	TTCTTCCACGATCATACATTAATAATTATATTAATAATCATCACAACCGTTATATACATGATAACCACCCTACTTTGAAATAAACATACTAGACGATTCATACTAGAAGGACAACTAATTGAAACTACATGAACAATTGCACCAGCAATTATCTTAGTATTCATTGCAATACCATCCTTACGACTTCTATATCTAATAGACGAAATCCACAACCCAACAATAACCCTAAAAGCAGTGGGACATCAATGATACTGAAGATATGAATATTCAGACTTCACAAAATTAGAATTCGACTCTTACATAATCCCACAAGAGGAAAATCAAGCAAGAACTTTCCGACTACTAGACACAGATAATCGAATTGTACTACCCATAAATTCACCAATCCGACTAGTAGTG…	ACATCACTTAGAATACTAATTCGAACAGAACTAGGGCAACCCGGATCTCTAATTGGAGATGACCAGATCTACAACGTTATCGTTACTGCTCATGCATTCGTCATAATTTTCTTTATAGTCATACCAATCATGATTGGTGGATTCGGAAACTGATTAGTACCACTTATATTAGGAGCCCCAGACATGGCATTCCCACGAATAAACAACATAAGATTTTGATTACTCCCACCGTCATTAACATTACTACTTACTAGCAGAACAGTAGAAAGTGGAGCAGGGACAGGATGAACAGTCTACCCCCCTCTTGCGAGAGGTATTGCCCATGCAGGAGCATCCGTAGACTTAGCCATCTTCTCCTTACATCTAGCAGGTGTTTCATCAATTTTGGGAGCAGTAAAT…	AGTGTCATCTTTAAGTCACAACAACCCATTATTTAACTGATTTCTTACTAAATTTTGTACGTTACTAGGGCTGTGACTGATTACTTTCACTGCAAACTGAAACTACAACCGTCTGTATGAGGAACAAGTTACATTTTTTCACTGCTTAAAACAACGGCAGCCGAAGGGACATATTTGCACCAGTTCCATCCAGTCCAAACACACACATAACGATTTATCCAGACACATATCAACGTTATTACGTGACCATC	AGTGTCATCTTTAAGTCACAACAACCCATTATTTAACTGATTTCTTACTAAATTTTGTACGTTACTAGGGCTGTGACTGATTACTTTCACTGCAAACTGAAACTACAACCGTCTGTATGAGGAACAAGTTACATTTTTTCACTGCTTAAAACAACGGCAGCCGACGGGACATATTTGCACCAGTTCCATCCAGTCCAAACACACACATAACGATTTTTCCAGACACATTTCAACGTTATTACGTGACCATC
R. flavipes	A138	42	106	RfA138_3	MK295454	MK295582	MK295327	-85.8468	34.1468	1	5	6	C	1,3	ACATCACTTAGAATACTAATTCGAACAGAACTAGGGCAACCCGGATCTCTAATTGGAGATGACCAGATCTACAACGTTATCGTTACTGCTCATGCATTCGTCATAATTTTCTTTATAGTCATACCAATCATGATTGGTGGATTCGGAAACTGATTAGTACCACTTATATTAGGAGCCCCAGACATGGCATTCCCACGAATAAACAACATAAGATTTTGATTACTCCCACCGTCATTAACATTACTACTTACTAGCAGAACAGTAGAAAGTGGAGCAGGGACAGGATGAACAGTCTACCCCCCTCTTGCGAGAGGTATTGCCCATGCAGGAGCATCCGTAGACTTAGCCATCTTCTCCTTACATCTAGCAGGTGTTTCATCAATTTTGGGAGCAGTAAAT…	TTCTTCCACGATCATACATTAATAATTATATTAATAATCATCACAACCGTTATATACATGATAACCACCCTACTTTGAAATAAACATACTAGACGATTCATACTAGAAGGACAACTAATTGAAACTACATGAACAATTGCACCAGCAATTATCTTAGTATTCATTGCAATACCATCCTTACGACTTCTATATCTAATAGACGAAATCCACAACCCAACAATAACCCTAAAAGCAGTGGGACATCAATGATACTGAAGATATGAATATTCAGACTTCACAAAATTAGAATTCGACTCTTACATAATCCCACAAGAGGAAAATCAAGCAAGAACTTTCCGACTACTAGACACAGATAATCGAATTGTACTACCCATAAATTCACCAATCCGACTAGTAGTG…	ACATCACTTAGAATACTAATTCGAACAGAACTAGGGCAACCCGGATCTCTAATTGGAGATGACCAGATCTACAACGTTATCGTTACTGCTCATGCATTCGTCATAATTTTCTTTATAGTCATACCAATCATGATTGGTGGATTCGGAAACTGATTAGTACCACTTATATTAGGAGCCCCAGACATGGCATTCCCACGAATAAACAACATAAGATTTTGATTACTCCCACCGTCATTAACATTACTACTTACTAGCAGAACAGTAGAAAGTGGAGCAGGGACAGGATGAACAGTCTACCCCCCTCTTGCGAGAGGTATTGCCCATGCAGGAGCATCCGTAGACTTAGCCATCTTCTCCTTACATCTAGCAGGTGTTTCATCAATTTTGGGAGCAGTAAAT…	AGTGTCATCTTTAAGTCACAACAACCCATTATTTAACTGATTTCTTACTAAATTTTGTACGTTACTAGGGCTGTGACTGATTACTTTCACTGCAAACTGAAACTACAACCGTCTGTATGAGGAACAAGTTACATTTTTTCACTGCTTAAAACAACGGCAGCCGAAGGGACATATTTGCACCAGTTCCATCCAGTCCAAACACACACATAACGATTTATCCAGACACATATCAACGTTATTACGTGACCATC	AGTGTCATCTTTAAGTCACAACAACCCATTATTTAACTGATTTCTTACTAAATTTTGTACGTTACTAGGGCTGTGACTGATTACTTTCACTGCAAACTGAAACTACAACCGTCTGTATGAGGAACAAGTTACATTTTTTCACTGCTTAAAACAACGGCAGCCGACGGGACATATTTGCACCAGTTCCATCCAGTCCAAACACACACATAACGATTTTTCCAGACACATTTCAACGTTATTACGTGACCATC
R. flavipes	A139	43	107	RfA139_1	MK295455	MK295583	MK295328	-85.2643	34.1226	1	5	6	C	1,3	ACATCACTTAGAATACTAATTCGAACAGAACTAGGGCAACCCGGATCTCTAATTGGAGATGACCAGATCTACAACGTTATCGTTACTGCTCATGCATTCGTCATAATTTTCTTTATAGTCATACCAATCATGATTGGTGGATTCGGAAACTGATTAGTACCACTTATATTAGGAGCCCCAGACATGGCATTCCCACGAATAAACAACATAAGATTTTGATTACTCCCACCGTCATTAACATTACTACTTACTAGCAGAACAGTAGAAAGTGGAGCAGGGACAGGATGAACAGTCTACCCCCCTCTTGCGAGAGGTATTGCCCATGCAGGAGCATCCGTAGACTTAGCCATCTTCTCCTTACATCTAGCAGGTGTTTCATCAATTTTGGGAGCAGTAAAT…	TTCTTCCACGATCATACATTAATAATTATATTAATAATCATCACAACCGTTATATACATGATAACCACCCTACTTTGAAATAAACATACTAGACGATTCATACTAGAAGGACAACTAATTGAAACTACATGAACAATTGCACCAGCAATTATCTTAGTATTCATTGCAATACCATCCTTACGACTTCTATATCTAATAGACGAAATCCACAACCCAACAATAACCCTAAAAGCAGTGGGACATCAATGATACTGAAGATATGAATATTCAGACTTCACAAAATTAGAATTCGACTCTTACATAATCCCACAAGAGGAAAATCAAGCAAGAACTTTCCGACTACTAGACACAGATAATCGAATTGTACTACCCATAAATTCACCAATCCGACTAGTAGTG…	ACATCACTTAGAATACTAATTCGAACAGAACTAGGGCAACCCGGATCTCTAATTGGAGATGACCAGATCTACAACGTTATCGTTACTGCTCATGCATTCGTCATAATTTTCTTTATAGTCATACCAATCATGATTGGTGGATTCGGAAACTGATTAGTACCACTTATATTAGGAGCCCCAGACATGGCATTCCCACGAATAAACAACATAAGATTTTGATTACTCCCACCGTCATTAACATTACTACTTACTAGCAGAACAGTAGAAAGTGGAGCAGGGACAGGATGAACAGTCTACCCCCCTCTTGCGAGAGGTATTGCCCATGCAGGAGCATCCGTAGACTTAGCCATCTTCTCCTTACATCTAGCAGGTGTTTCATCAATTTTGGGAGCAGTAAAT…	AGTGTCATCTTTAAGTCACAACAACCCATTATTTAACTGATTTCTTACTAAATTTTGTACGTTACTAGGGCTGTGACTGATTACTTTCACTGCAAACTGAAACTACAACCGTCTGTATGAGGAACAAGTTACATTTTTTCACTGCTTAAAACAACGGCAGCCGAAGGGACATATTTGCACCAGTTCCATCCAGTCCAAACACACACATAACGATTTATCCAGACACATATCAACGTTATTACGTGACCATC	AGTGTCATCTTTAAGTCACAACAACCCATTATTTAACTGATTTCTTACTAAATTTTGTACGTTACTAGGGCTGTGACTGATTACTTTCACTGCAAACTGAAACTACAACCGTCTGTATGAGGAACAAGTTACATTTTTTCACTGCTTAAAACAACGGCAGCCGACGGGACATATTTGCACCAGTTCCATCCAGTCCAAACACACACATAACGATTTTTCCAGACACATTTCAACGTTATTACGTGACCATC
R. flavipes	A139	43	108	RfA139_2	MK295456	MK295584	MK295329	-85.2643	34.1226	1	5	6	C	1,3	ACATCACTTAGAATACTAATTCGAACAGAACTAGGGCAACCCGGATCTCTAATTGGAGATGACCAGATCTACAACGTTATCGTTACTGCTCATGCATTCGTCATAATTTTCTTTATAGTCATACCAATCATGATTGGTGGATTCGGAAACTGATTAGTACCACTTATATTAGGAGCCCCAGACATGGCATTCCCACGAATAAACAACATAAGATTTTGATTACTCCCACCGTCATTAACATTACTACTTACTAGCAGAACAGTAGAAAGTGGAGCAGGGACAGGATGAACAGTCTACCCCCCTCTTGCGAGAGGTATTGCCCATGCAGGAGCATCCGTAGACTTAGCCATCTTCTCCTTACATCTAGCAGGTGTTTCATCAATTTTGGGAGCAGTAAAT…	TTCTTCCACGATCATACATTAATAATTATATTAATAATCATCACAACCGTTATATACATGATAACCACCCTACTTTGAAATAAACATACTAGACGATTCATACTAGAAGGACAACTAATTGAAACTACATGAACAATTGCACCAGCAATTATCTTAGTATTCATTGCAATACCATCCTTACGACTTCTATATCTAATAGACGAAATCCACAACCCAACAATAACCCTAAAAGCAGTGGGACATCAATGATACTGAAGATATGAATATTCAGACTTCACAAAATTAGAATTCGACTCTTACATAATCCCACAAGAGGAAAATCAAGCAAGAACTTTCCGACTACTAGACACAGATAATCGAATTGTACTACCCATAAATTCACCAATCCGACTAGTAGTG…	ACATCACTTAGAATACTAATTCGAACAGAACTAGGGCAACCCGGATCTCTAATTGGAGATGACCAGATCTACAACGTTATCGTTACTGCTCATGCATTCGTCATAATTTTCTTTATAGTCATACCAATCATGATTGGTGGATTCGGAAACTGATTAGTACCACTTATATTAGGAGCCCCAGACATGGCATTCCCACGAATAAACAACATAAGATTTTGATTACTCCCACCGTCATTAACATTACTACTTACTAGCAGAACAGTAGAAAGTGGAGCAGGGACAGGATGAACAGTCTACCCCCCTCTTGCGAGAGGTATTGCCCATGCAGGAGCATCCGTAGACTTAGCCATCTTCTCCTTACATCTAGCAGGTGTTTCATCAATTTTGGGAGCAGTAAAT…	AGTGTCATCTTTAAGTCACAACAACCCATTATTTAACTGATTTCTTACTAAATTTTGTACGTTACTAGGGCTGTGACTGATTACTTTCACTGCAAACTGAAACTACAACCGTCTGTATGAGGAACAAGTTACATTTTTTCACTGCTTAAAACAACGGCAGCCGAAGGGACATATTTGCACCAGTTCCATCCAGTCCAAACACACACATAACGATTTATCCAGACACATATCAACGTTATTACGTGACCATC	AGTGTCATCTTTAAGTCACAACAACCCATTATTTAACTGATTTCTTACTAAATTTTGTACGTTACTAGGGCTGTGACTGATTACTTTCACTGCAAACTGAAACTACAACCGTCTGTATGAGGAACAAGTTACATTTTTTCACTGCTTAAAACAACGGCAGCCGACGGGACATATTTGCACCAGTTCCATCCAGTCCAAACACACACATAACGATTTTTCCAGACACATTTCAACGTTATTACGTGACCATC
R. flavipes	A139	43	109	RfA139_3	MK295457	MK295585	MK295330	-85.2643	34.1226	1	5	6	C	1,3	ACATCACTTAGAATACTAATTCGAACAGAACTAGGGCAACCCGGATCTCTAATTGGAGATGACCAGATCTACAACGTTATCGTTACTGCTCATGCATTCGTCATAATTTTCTTTATAGTCATACCAATCATGATTGGTGGATTCGGAAACTGATTAGTACCACTTATATTAGGAGCCCCAGACATGGCATTCCCACGAATAAACAACATAAGATTTTGATTACTCCCACCGTCATTAACATTACTACTTACTAGCAGAACAGTAGAAAGTGGAGCAGGGACAGGATGAACAGTCTACCCCCCTCTTGCGAGAGGTATTGCCCATGCAGGAGCATCCGTAGACTTAGCCATCTTCTCCTTACATCTAGCAGGTGTTTCATCAATTTTGGGAGCAGTAAAT…	TTCTTCCACGATCATACATTAATAATTATATTAATAATCATCACAACCGTTATATACATGATAACCACCCTACTTTGAAATAAACATACTAGACGATTCATACTAGAAGGACAACTAATTGAAACTACATGAACAATTGCACCAGCAATTATCTTAGTATTCATTGCAATACCATCCTTACGACTTCTATATCTAATAGACGAAATCCACAACCCAACAATAACCCTAAAAGCAGTGGGACATCAATGATACTGAAGATATGAATATTCAGACTTCACAAAATTAGAATTCGACTCTTACATAATCCCACAAGAGGAAAATCAAGCAAGAACTTTCCGACTACTAGACACAGATAATCGAATTGTACTACCCATAAATTCACCAATCCGACTAGTAGTG…	ACATCACTTAGAATACTAATTCGAACAGAACTAGGGCAACCCGGATCTCTAATTGGAGATGACCAGATCTACAACGTTATCGTTACTGCTCATGCATTCGTCATAATTTTCTTTATAGTCATACCAATCATGATTGGTGGATTCGGAAACTGATTAGTACCACTTATATTAGGAGCCCCAGACATGGCATTCCCACGAATAAACAACATAAGATTTTGATTACTCCCACCGTCATTAACATTACTACTTACTAGCAGAACAGTAGAAAGTGGAGCAGGGACAGGATGAACAGTCTACCCCCCTCTTGCGAGAGGTATTGCCCATGCAGGAGCATCCGTAGACTTAGCCATCTTCTCCTTACATCTAGCAGGTGTTTCATCAATTTTGGGAGCAGTAAAT…	AGTGTCATCTTTAAGTCACAACAACCCATTATTTAACTGATTTCTTACTAAATTTTGTACGTTACTAGGGCTGTGACTGATTACTTTCACTGCAAACTGAAACTACAACCGTCTGTATGAGGAACAAGTTACATTTTTTCACTGCTTAAAACAACGGCAGCCGAAGGGACATATTTGCACCAGTTCCATCCAGTCCAAACACACACATAACGATTTATCCAGACACATATCAACGTTATTACGTGACCATC	AGTGTCATCTTTAAGTCACAACAACCCATTATTTAACTGATTTCTTACTAAATTTTGTACGTTACTAGGGCTGTGACTGATTACTTTCACTGCAAACTGAAACTACAACCGTCTGTATGAGGAACAAGTTACATTTTTTCACTGCTTAAAACAACGGCAGCCGACGGGACATATTTGCACCAGTTCCATCCAGTCCAAACACACACATAACGATTTTTCCAGACACATTTCAACGTTATTACGTGACCATC
R. flavipes	A141	44	110	RfA141_1	MK295458	MK295586	MK295331	-83.1076	34.862	24	5	28	C	1,3	ACATCACTTAGAATACTAATTCGAACAGAACTAGGGCAACCCGGATCTCTAATTGGAGATGACCAGATCTACAACGTTATCGTTACTGCTCATGCATTCGTCATAATTTTCTTTATAGTCATACCAATCATGATTGGTGGATTCGGAAACTGATTAGTACCACTTATATTAGGAGCCCCAGACATGGCATTCCCACGAATAAACAACATAAGATTTTGATTACTCCCACCATCATTAACATTACTACTTACTAGCAGAACAGTAGAAAGTGGAGCAGGGACAGGATGAACAGTCTACCCCCCTCTTGCGAGAGGTATTGCCCATGCAGGAGCATCCGTAGACTTAGCCATCTTCTCCTTACATCTAGCAGGTGTTTCATCAATTTTGGGAGCAGTAAAT…	TTCTTCCACGATCATACATTAATAATTATATTAATAATCATCACAACCGTTATATACATGATAACCACCCTACTTTGAAATAAACATACTAGACGATTCATACTAGAAGGACAACTAATTGAAACTACATGAACAATTGCACCAGCAATTATCTTAGTATTCATTGCAATACCATCCTTACGACTTCTATATCTAATAGACGAAATCCACAACCCAACAATAACCCTAAAAGCAGTGGGACATCAATGATACTGAAGATATGAATATTCAGACTTCACAAAATTAGAATTCGACTCTTACATAATCCCACAAGAGGAAAATCAAGCAAGAACTTTCCGACTACTAGACACAGATAATCGAATTGTACTACCCATAAATTCACCAATCCGACTAGTAGTG…	ACATCACTTAGAATACTAATTCGAACAGAACTAGGGCAACCCGGATCTCTAATTGGAGATGACCAGATCTACAACGTTATCGTTACTGCTCATGCATTCGTCATAATTTTCTTTATAGTCATACCAATCATGATTGGTGGATTCGGAAACTGATTAGTACCACTTATATTAGGAGCCCCAGACATGGCATTCCCACGAATAAACAACATAAGATTTTGATTACTCCCACCATCATTAACATTACTACTTACTAGCAGAACAGTAGAAAGTGGAGCAGGGACAGGATGAACAGTCTACCCCCCTCTTGCGAGAGGTATTGCCCATGCAGGAGCATCCGTAGACTTAGCCATCTTCTCCTTACATCTAGCAGGTGTTTCATCAATTTTGGGAGCAGTAAAT…	AGTGTCATCTTTAAGTCACAACAACCCATTATTTAACTGATTTCTTACTAAATTTTGTACGTTACTAGGGCTGTGACTGATTACTTTCACTGCAAACTGAAACTACAACCGTCTGTATGAGGAACAAGTTACATTTTTTCACTGCTTAAAACAACGGCAGCCGAAGGGACATATTTGCACCAGTTCCATCCAGTCCAAACACACACATAACGATTTATCCAGACACATATCAACGTTATTACGTGACCATC	AGTGTCATCTTTAAGTCACAACAACCCATTATTTAACTGATTTCTTACTAAATTTTGTACGTTACTAGGGCTGTGACTGATTACTTTCACTGCAAACTGAAACTACAACCGTCTGTATGAGGAACAAGTTACATTTTTTCACTGCTTAAAACAACGGCAGCCGACGGGACATATTTGCACCAGTTCCATCCAGTCCAAACACACACATAACGATTTTTCCAGACACATTTCAACGTTATTACGTGACCATC
R. flavipes	A141	44	111	RfA141_2	MK295459	MK295587	MK295332	-83.1076	34.862	24	5	28	C	1,3	ACATCACTTAGAATACTAATTCGAACAGAACTAGGGCAACCCGGATCTCTAATTGGAGATGACCAGATCTACAACGTTATCGTTACTGCTCATGCATTCGTCATAATTTTCTTTATAGTCATACCAATCATGATTGGTGGATTCGGAAACTGATTAGTACCACTTATATTAGGAGCCCCAGACATGGCATTCCCACGAATAAACAACATAAGATTTTGATTACTCCCACCATCATTAACATTACTACTTACTAGCAGAACAGTAGAAAGTGGAGCAGGGACAGGATGAACAGTCTACCCCCCTCTTGCGAGAGGTATTGCCCATGCAGGAGCATCCGTAGACTTAGCCATCTTCTCCTTACATCTAGCAGGTGTTTCATCAATTTTGGGAGCAGTAAAT…	TTCTTCCACGATCATACATTAATAATTATATTAATAATCATCACAACCGTTATATACATGATAACCACCCTACTTTGAAATAAACATACTAGACGATTCATACTAGAAGGACAACTAATTGAAACTACATGAACAATTGCACCAGCAATTATCTTAGTATTCATTGCAATACCATCCTTACGACTTCTATATCTAATAGACGAAATCCACAACCCAACAATAACCCTAAAAGCAGTGGGACATCAATGATACTGAAGATATGAATATTCAGACTTCACAAAATTAGAATTCGACTCTTACATAATCCCACAAGAGGAAAATCAAGCAAGAACTTTCCGACTACTAGACACAGATAATCGAATTGTACTACCCATAAATTCACCAATCCGACTAGTAGTG…	ACATCACTTAGAATACTAATTCGAACAGAACTAGGGCAACCCGGATCTCTAATTGGAGATGACCAGATCTACAACGTTATCGTTACTGCTCATGCATTCGTCATAATTTTCTTTATAGTCATACCAATCATGATTGGTGGATTCGGAAACTGATTAGTACCACTTATATTAGGAGCCCCAGACATGGCATTCCCACGAATAAACAACATAAGATTTTGATTACTCCCACCATCATTAACATTACTACTTACTAGCAGAACAGTAGAAAGTGGAGCAGGGACAGGATGAACAGTCTACCCCCCTCTTGCGAGAGGTATTGCCCATGCAGGAGCATCCGTAGACTTAGCCATCTTCTCCTTACATCTAGCAGGTGTTTCATCAATTTTGGGAGCAGTAAAT…	AGTGTCATCTTTAAGTCACAACAACCCATTATTTAACTGATTTCTTACTAAATTTTGTACGTTACTAGGGCTGTGACTGATTACTTTCACTGCAAACTGAAACTACAACCGTCTGTATGAGGAACAAGTTACATTTTTTCACTGCTTAAAACAACGGCAGCCGAAGGGACATATTTGCACCAGTTCCATCCAGTCCAAACACACACATAACGATTTATCCAGACACATATCAACGTTATTACGTGACCATC	AGTGTCATCTTTAAGTCACAACAACCCATTATTTAACTGATTTCTTACTAAATTTTGTACGTTACTAGGGCTGTGACTGATTACTTTCACTGCAAACTGAAACTACAACCGTCTGTATGAGGAACAAGTTACATTTTTTCACTGCTTAAAACAACGGCAGCCGACGGGACATATTTGCACCAGTTCCATCCAGTCCAAACACACACATAACGATTTTTCCAGACACATTTCAACGTTATTACGTGACCATC
R. flavipes	A141	44	112	RfA141_3	MK295460	MK295588	MK295333	-83.1076	34.862	24	5	28	C	1,3	ACATCACTTAGAATACTAATTCGAACAGAACTAGGGCAACCCGGATCTCTAATTGGAGATGACCAGATCTACAACGTTATCGTTACTGCTCATGCATTCGTCATAATTTTCTTTATAGTCATACCAATCATGATTGGTGGATTCGGAAACTGATTAGTACCACTTATATTAGGAGCCCCAGACATGGCATTCCCACGAATAAACAACATAAGATTTTGATTACTCCCACCATCATTAACATTACTACTTACTAGCAGAACAGTAGAAAGTGGAGCAGGGACAGGATGAACAGTCTACCCCCCTCTTGCGAGAGGTATTGCCCATGCAGGAGCATCCGTAGACTTAGCCATCTTCTCCTTACATCTAGCAGGTGTTTCATCAATTTTGGGAGCAGTAAAT…	TTCTTCCACGATCATACATTAATAATTATATTAATAATCATCACAACCGTTATATACATGATAACCACCCTACTTTGAAATAAACATACTAGACGATTCATACTAGAAGGACAACTAATTGAAACTACATGAACAATTGCACCAGCAATTATCTTAGTATTCATTGCAATACCATCCTTACGACTTCTATATCTAATAGACGAAATCCACAACCCAACAATAACCCTAAAAGCAGTGGGACATCAATGATACTGAAGATATGAATATTCAGACTTCACAAAATTAGAATTCGACTCTTACATAATCCCACAAGAGGAAAATCAAGCAAGAACTTTCCGACTACTAGACACAGATAATCGAATTGTACTACCCATAAATTCACCAATCCGACTAGTAGTG…	ACATCACTTAGAATACTAATTCGAACAGAACTAGGGCAACCCGGATCTCTAATTGGAGATGACCAGATCTACAACGTTATCGTTACTGCTCATGCATTCGTCATAATTTTCTTTATAGTCATACCAATCATGATTGGTGGATTCGGAAACTGATTAGTACCACTTATATTAGGAGCCCCAGACATGGCATTCCCACGAATAAACAACATAAGATTTTGATTACTCCCACCATCATTAACATTACTACTTACTAGCAGAACAGTAGAAAGTGGAGCAGGGACAGGATGAACAGTCTACCCCCCTCTTGCGAGAGGTATTGCCCATGCAGGAGCATCCGTAGACTTAGCCATCTTCTCCTTACATCTAGCAGGTGTTTCATCAATTTTGGGAGCAGTAAAT…	AGTGTCATCTTTAAGTCACAACAACCCATTATTTAACTGATTTCTTACTAAATTTTGTACGTTACTAGGGCTGTGACTGATTACTTTCACTGCAAACTGAAACTACAACCGTCTGTATGAGGAACAAGTTACATTTTTTCACTGCTTAAAACAACGGCAGCCGAAGGGACATATTTGCACCAGTTCCATCCAGTCCAAACACACACATAACGATTTATCCAGACACATATCAACGTTATTACGTGACCATC	AGTGTCATCTTTAAGTCACAACAACCCATTATTTAACTGATTTCTTACTAAATTTTGTACGTTACTAGGGCTGTGACTGATTACTTTCACTGCAAACTGAAACTACAACCGTCTGTATGAGGAACAAGTTACATTTTTTCACTGCTTAAAACAACGGCAGCCGACGGGACATATTTGCACCAGTTCCATCCAGTCCAAACACACACATAACGATTTTTCCAGACACATTTCAACGTTATTACGTGACCATC
R. flavipes	A141	45	113	RfA141c_1	MK295461	MK295589	MK295334	-83.1076	34.862	16	5	19	C	1,3	ACATCACTTAGAATGCTAATTCGAACAGAACTAGGGCAACCCGGATCTCTAATTGGAGATGACCAGATCTACAACGTTATCGTTACTGCTCATGCATTCGTCATAATTTTCTTTATAGTCATACCAATCATGATTGGTGGATTCGGAAACTGATTAGTACCACTTATATTAGGAGCCCCAGACATGGCATTCCCACGAATAAACAACATAAGATTTTGATTACTCCCACCATCATTAACATTACTACTTACTAGCAGAACAGTAGAAAGTGGAGCAGGGACAGGATGAACAGTCTACCCCCCTCTTGCGAGAGGTATTGCCCATGCAGGAGCATCCGTAGACTTAGCCATCTTCTCCTTACATCTAGCAGGTGTTTCATCAATTTTGGGAGCAGTAAAT…	TTCTTCCACGATCATACATTAATAATTATATTAATAATCATCACAACCGTTATATACATGATAACCACCCTACTTTGAAATAAACATACTAGACGATTCATACTAGAAGGACAACTAATTGAAACTACATGAACAATTGCACCAGCAATTATCTTAGTATTCATTGCAATACCATCCTTACGACTTCTATATCTAATAGACGAAATCCACAACCCAACAATAACCCTAAAAGCAGTGGGACATCAATGATACTGAAGATATGAATATTCAGACTTCACAAAATTAGAATTCGACTCTTACATAATCCCACAAGAGGAAAATCAAGCAAGAACTTTCCGACTACTAGACACAGATAATCGAATTGTACTACCCATAAATTCACCAATCCGACTAGTAGTG…	ACATCACTTAGAATGCTAATTCGAACAGAACTAGGGCAACCCGGATCTCTAATTGGAGATGACCAGATCTACAACGTTATCGTTACTGCTCATGCATTCGTCATAATTTTCTTTATAGTCATACCAATCATGATTGGTGGATTCGGAAACTGATTAGTACCACTTATATTAGGAGCCCCAGACATGGCATTCCCACGAATAAACAACATAAGATTTTGATTACTCCCACCATCATTAACATTACTACTTACTAGCAGAACAGTAGAAAGTGGAGCAGGGACAGGATGAACAGTCTACCCCCCTCTTGCGAGAGGTATTGCCCATGCAGGAGCATCCGTAGACTTAGCCATCTTCTCCTTACATCTAGCAGGTGTTTCATCAATTTTGGGAGCAGTAAAT…	AGTGTCATCTTTAAGTCACAACAACCCATTATTTAACTGATTTCTTACTAAATTTTGTACGTTACTAGGGCTGTGACTGATTACTTTCACTGCAAACTGAAACTACAACCGTCTGTATGAGGAACAAGTTACATTTTTTCACTGCTTAAAACAACGGCAGCCGAAGGGACATATTTGCACCAGTTCCATCCAGTCCAAACACACACATAACGATTTATCCAGACACATATCAACGTTATTACGTGACCATC	AGTGTCATCTTTAAGTCACAACAACCCATTATTTAACTGATTTCTTACTAAATTTTGTACGTTACTAGGGCTGTGACTGATTACTTTCACTGCAAACTGAAACTACAACCGTCTGTATGAGGAACAAGTTACATTTTTTCACTGCTTAAAACAACGGCAGCCGACGGGACATATTTGCACCAGTTCCATCCAGTCCAAACACACACATAACGATTTTTCCAGACACATTTCAACGTTATTACGTGACCATC
R. flavipes	A141	45	114	RfA141c_2	MK295462	MK295590	MK295335	-83.1076	34.862	16	5	19	C	1,3	ACATCACTTAGAATGCTAATTCGAACAGAACTAGGGCAACCCGGATCTCTAATTGGAGATGACCAGATCTACAACGTTATCGTTACTGCTCATGCATTCGTCATAATTTTCTTTATAGTCATACCAATCATGATTGGTGGATTCGGAAACTGATTAGTACCACTTATATTAGGAGCCCCAGACATGGCATTCCCACGAATAAACAACATAAGATTTTGATTACTCCCACCATCATTAACATTACTACTTACTAGCAGAACAGTAGAAAGTGGAGCAGGGACAGGATGAACAGTCTACCCCCCTCTTGCGAGAGGTATTGCCCATGCAGGAGCATCCGTAGACTTAGCCATCTTCTCCTTACATCTAGCAGGTGTTTCATCAATTTTGGGAGCAGTAAAT…	TTCTTCCACGATCATACATTAATAATTATATTAATAATCATCACAACCGTTATATACATGATAACCACCCTACTTTGAAATAAACATACTAGACGATTCATACTAGAAGGACAACTAATTGAAACTACATGAACAATTGCACCAGCAATTATCTTAGTATTCATTGCAATACCATCCTTACGACTTCTATATCTAATAGACGAAATCCACAACCCAACAATAACCCTAAAAGCAGTGGGACATCAATGATACTGAAGATATGAATATTCAGACTTCACAAAATTAGAATTCGACTCTTACATAATCCCACAAGAGGAAAATCAAGCAAGAACTTTCCGACTACTAGACACAGATAATCGAATTGTACTACCCATAAATTCACCAATCCGACTAGTAGTG…	ACATCACTTAGAATGCTAATTCGAACAGAACTAGGGCAACCCGGATCTCTAATTGGAGATGACCAGATCTACAACGTTATCGTTACTGCTCATGCATTCGTCATAATTTTCTTTATAGTCATACCAATCATGATTGGTGGATTCGGAAACTGATTAGTACCACTTATATTAGGAGCCCCAGACATGGCATTCCCACGAATAAACAACATAAGATTTTGATTACTCCCACCATCATTAACATTACTACTTACTAGCAGAACAGTAGAAAGTGGAGCAGGGACAGGATGAACAGTCTACCCCCCTCTTGCGAGAGGTATTGCCCATGCAGGAGCATCCGTAGACTTAGCCATCTTCTCCTTACATCTAGCAGGTGTTTCATCAATTTTGGGAGCAGTAAAT…	AGTGTCATCTTTAAGTCACAACAACCCATTATTTAACTGATTTCTTACTAAATTTTGTACGTTACTAGGGCTGTGACTGATTACTTTCACTGCAAACTGAAACTACAACCGTCTGTATGAGGAACAAGTTACATTTTTTCACTGCTTAAAACAACGGCAGCCGAAGGGACATATTTGCACCAGTTCCATCCAGTCCAAACACACACATAACGATTTATCCAGACACATATCAACGTTATTACGTGACCATC	AGTGTCATCTTTAAGTCACAACAACCCATTATTTAACTGATTTCTTACTAAATTTTGTACGTTACTAGGGCTGTGACTGATTACTTTCACTGCAAACTGAAACTACAACCGTCTGTATGAGGAACAAGTTACATTTTTTCACTGCTTAAAACAACGGCAGCCGACGGGACATATTTGCACCAGTTCCATCCAGTCCAAACACACACATAACGATTTTTCCAGACACATTTCAACGTTATTACGTGACCATC
R. flavipes	A141	45	115	RfA141c_3	MK295463	MK295591	MK295336	-83.1076	34.862	16	5	19	C	1,3	ACATCACTTAGAATGCTAATTCGAACAGAACTAGGGCAACCCGGATCTCTAATTGGAGATGACCAGATCTACAACGTTATCGTTACTGCTCATGCATTCGTCATAATTTTCTTTATAGTCATACCAATCATGATTGGTGGATTCGGAAACTGATTAGTACCACTTATATTAGGAGCCCCAGACATGGCATTCCCACGAATAAACAACATAAGATTTTGATTACTCCCACCATCATTAACATTACTACTTACTAGCAGAACAGTAGAAAGTGGAGCAGGGACAGGATGAACAGTCTACCCCCCTCTTGCGAGAGGTATTGCCCATGCAGGAGCATCCGTAGACTTAGCCATCTTCTCCTTACATCTAGCAGGTGTTTCATCAATTTTGGGAGCAGTAAAT…	TTCTTCCACGATCATACATTAATAATTATATTAATAATCATCACAACCGTTATATACATGATAACCACCCTACTTTGAAATAAACATACTAGACGATTCATACTAGAAGGACAACTAATTGAAACTACATGAACAATTGCACCAGCAATTATCTTAGTATTCATTGCAATACCATCCTTACGACTTCTATATCTAATAGACGAAATCCACAACCCAACAATAACCCTAAAAGCAGTGGGACATCAATGATACTGAAGATATGAATATTCAGACTTCACAAAATTAGAATTCGACTCTTACATAATCCCACAAGAGGAAAATCAAGCAAGAACTTTCCGACTACTAGACACAGATAATCGAATTGTACTACCCATAAATTCACCAATCCGACTAGTAGTG…	ACATCACTTAGAATGCTAATTCGAACAGAACTAGGGCAACCCGGATCTCTAATTGGAGATGACCAGATCTACAACGTTATCGTTACTGCTCATGCATTCGTCATAATTTTCTTTATAGTCATACCAATCATGATTGGTGGATTCGGAAACTGATTAGTACCACTTATATTAGGAGCCCCAGACATGGCATTCCCACGAATAAACAACATAAGATTTTGATTACTCCCACCATCATTAACATTACTACTTACTAGCAGAACAGTAGAAAGTGGAGCAGGGACAGGATGAACAGTCTACCCCCCTCTTGCGAGAGGTATTGCCCATGCAGGAGCATCCGTAGACTTAGCCATCTTCTCCTTACATCTAGCAGGTGTTTCATCAATTTTGGGAGCAGTAAAT…	AGTGTCATCTTTAAGTCACAACAACCCATTATTTAACTGATTTCTTACTAAATTTTGTACGTTACTAGGGCTGTGACTGATTACTTTCACTGCAAACTGAAACTACAACCGTCTGTATGAGGAACAAGTTACATTTTTTCACTGCTTAAAACAACGGCAGCCGAAGGGACATATTTGCACCAGTTCCATCCAGTCCAAACACACACATAACGATTTATCCAGACACATATCAACGTTATTACGTGACCATC	AGTGTCATCTTTAAGTCACAACAACCCATTATTTAACTGATTTCTTACTAAATTTTGTACGTTACTAGGGCTGTGACTGATTACTTTCACTGCAAACTGAAACTACAACCGTCTGTATGAGGAACAAGTTACATTTTTTCACTGCTTAAAACAACGGCAGCCGACGGGACATATTTGCACCAGTTCCATCCAGTCCAAACACACACATAACGATTTTTCCAGACACATTTCAACGTTATTACGTGACCATC
R. flavipes	A142	46	116	RfA142b_1	MK295464	MK295592	MK295337	-83.0556	35.0138	25	7	29	N	1,2	ACATCACTTAGTATACTAATTCGAACAGAACTAGGACAACCCGGATCTCTAATTGGAGATGACCAGATCTACAACGTTATCGTTACTGCTCATGCATTCGTCATAATTTTCTTTATGGTCATACCAATCATGATTGGTGGATTTGGAAACTGACTAGTACCACTTATATTAGGAGCCCCAGACATGGCATTCCCACGAATAAACAACATAAGATTTTGATTACTCCCACCATCATTAACATTACTACTTACTAGCAGAACAGTAGAAAGTGGAGCAGGGACAGGATGAACAGTTTACCCCCCTCTTGCGAGAGGTATTGCCCATGCAGGAGCATCCGTAGACTTAGCCATCTTCTCCTTACATCTAGCAGGTGTTTCATCAATTTTGGGAGCAGTAAAT…	TTCTTCCACGATCATACATTAATAATTATATTAATAATCATCACAACCGTTATATACATAATAACCACCCTACTTTGAAATAAACATACTAGACGATTCATACTAGAAGGACAACTAATTGAAACTACATGAACAATTGCACCAGCAATTATCTTAGTATTCATTGCAATACCATCCTTACGACTCCTATATCTAATAGACGAAATCCACAACCCAACAATAACCCTAAAAGCAGTAGGACATCAATGATACTGAAGATATGAATATTCAGACTTCACAAAATTAGAATTCGACTCTTACATAATCCCACAAGAGGAAAATCAAGCAAGAACTTTCCGACTACTAGACACAGATAATCGAATTGTACTACCCATAAATTCACCAATCCGACTAGTAGTG…	ACATCACTTAGTATACTAATTCGAACAGAACTAGGACAACCCGGATCTCTAATTGGAGATGACCAGATCTACAACGTTATCGTTACTGCTCATGCATTCGTCATAATTTTCTTTATGGTCATACCAATCATGATTGGTGGATTTGGAAACTGACTAGTACCACTTATATTAGGAGCCCCAGACATGGCATTCCCACGAATAAACAACATAAGATTTTGATTACTCCCACCATCATTAACATTACTACTTACTAGCAGAACAGTAGAAAGTGGAGCAGGGACAGGATGAACAGTTTACCCCCCTCTTGCGAGAGGTATTGCCCATGCAGGAGCATCCGTAGACTTAGCCATCTTCTCCTTACATCTAGCAGGTGTTTCATCAATTTTGGGAGCAGTAAAT…	AGTGTCATCTTTAAGTCACAACAACCCATTATTTAACTGATTTCTTACTAAATTTTGTACGTTACTAGGGCTGTGACTGATTACTTTCACTGCAAACTGAAACTACAACCGTCTGTATGAGGAACAAGTTACATTTTTTCACTGCTTAAAACAACGGCAGCCGAAGGGACATATTTGCACCAGTTCCATCCAGTCCAAACACACACATAACGATTTATCCAGACACATATCAACGTTATTACGTGACCATC	AGTGTCATCTTTAAGTCACAACAACCCATTATTTAACTGATTTCTTACTAAATTTTGTACGTTACTAGGGCTGTGACTGATTACTTTCACTGCAAACTGAAACTACAACCGTCTGTATGAGGAACAAGTTACATTTTTTCACTGCTTAAAACAACGGCAGCCGAAGGGACATATTTGCACCAGTTCCATCCAGTCCAAACACACACATAACGATTTTTCCAGACACATTTCAACGTTATTACGTGACCATC
R. flavipes	A142	46	117	RfA142b_2	MK295465	MK295593	MK295338	-83.0556	35.0138	25	7	29	N	1,2	ACATCACTTAGTATACTAATTCGAACAGAACTAGGACAACCCGGATCTCTAATTGGAGATGACCAGATCTACAACGTTATCGTTACTGCTCATGCATTCGTCATAATTTTCTTTATGGTCATACCAATCATGATTGGTGGATTTGGAAACTGACTAGTACCACTTATATTAGGAGCCCCAGACATGGCATTCCCACGAATAAACAACATAAGATTTTGATTACTCCCACCATCATTAACATTACTACTTACTAGCAGAACAGTAGAAAGTGGAGCAGGGACAGGATGAACAGTTTACCCCCCTCTTGCGAGAGGTATTGCCCATGCAGGAGCATCCGTAGACTTAGCCATCTTCTCCTTACATCTAGCAGGTGTTTCATCAATTTTGGGAGCAGTAAAT…	TTCTTCCACGATCATACATTAATAATTATATTAATAATCATCACAACCGTTATATACATAATAACCACCCTACTTTGAAATAAACATACTAGACGATTCATACTAGAAGGACAACTAATTGAAACTACATGAACAATTGCACCAGCAATTATCTTAGTATTCATTGCAATACCATCCTTACGACTCCTATATCTAATAGACGAAATCCACAACCCAACAATAACCCTAAAAGCAGTAGGACATCAATGATACTGAAGATATGAATATTCAGACTTCACAAAATTAGAATTCGACTCTTACATAATCCCACAAGAGGAAAATCAAGCAAGAACTTTCCGACTACTAGACACAGATAATCGAATTGTACTACCCATAAATTCACCAATCCGACTAGTAGTG…	ACATCACTTAGTATACTAATTCGAACAGAACTAGGACAACCCGGATCTCTAATTGGAGATGACCAGATCTACAACGTTATCGTTACTGCTCATGCATTCGTCATAATTTTCTTTATGGTCATACCAATCATGATTGGTGGATTTGGAAACTGACTAGTACCACTTATATTAGGAGCCCCAGACATGGCATTCCCACGAATAAACAACATAAGATTTTGATTACTCCCACCATCATTAACATTACTACTTACTAGCAGAACAGTAGAAAGTGGAGCAGGGACAGGATGAACAGTTTACCCCCCTCTTGCGAGAGGTATTGCCCATGCAGGAGCATCCGTAGACTTAGCCATCTTCTCCTTACATCTAGCAGGTGTTTCATCAATTTTGGGAGCAGTAAAT…	AGTGTCATCTTTAAGTCACAACAACCCATTATTTAACTGATTTCTTACTAAATTTTGTACGTTACTAGGGCTGTGACTGATTACTTTCACTGCAAACTGAAACTACAACCGTCTGTATGAGGAACAAGTTACATTTTTTCACTGCTTAAAACAACGGCAGCCGAAGGGACATATTTGCACCAGTTCCATCCAGTCCAAACACACACATAACGATTTATCCAGACACATATCAACGTTATTACGTGACCATC	AGTGTCATCTTTAAGTCACAACAACCCATTATTTAACTGATTTCTTACTAAATTTTGTACGTTACTAGGGCTGTGACTGATTACTTTCACTGCAAACTGAAACTACAACCGTCTGTATGAGGAACAAGTTACATTTTTTCACTGCTTAAAACAACGGCAGCCGAAGGGACATATTTGCACCAGTTCCATCCAGTCCAAACACACACATAACGATTTTTCCAGACACATTTCAACGTTATTACGTGACCATC
R. flavipes	A142	46	118	RfA142b_3	MK295466	MK295594	MK295339	-83.0556	35.0138	25	7	29	N	1,2	ACATCACTTAGTATACTAATTCGAACAGAACTAGGACAACCCGGATCTCTAATTGGAGATGACCAGATCTACAACGTTATCGTTACTGCTCATGCATTCGTCATAATTTTCTTTATGGTCATACCAATCATGATTGGTGGATTTGGAAACTGACTAGTACCACTTATATTAGGAGCCCCAGACATGGCATTCCCACGAATAAACAACATAAGATTTTGATTACTCCCACCATCATTAACATTACTACTTACTAGCAGAACAGTAGAAAGTGGAGCAGGGACAGGATGAACAGTTTACCCCCCTCTTGCGAGAGGTATTGCCCATGCAGGAGCATCCGTAGACTTAGCCATCTTCTCCTTACATCTAGCAGGTGTTTCATCAATTTTGGGAGCAGTAAAT…	TTCTTCCACGATCATACATTAATAATTATATTAATAATCATCACAACCGTTATATACATAATAACCACCCTACTTTGAAATAAACATACTAGACGATTCATACTAGAAGGACAACTAATTGAAACTACATGAACAATTGCACCAGCAATTATCTTAGTATTCATTGCAATACCATCCTTACGACTCCTATATCTAATAGACGAAATCCACAACCCAACAATAACCCTAAAAGCAGTAGGACATCAATGATACTGAAGATATGAATATTCAGACTTCACAAAATTAGAATTCGACTCTTACATAATCCCACAAGAGGAAAATCAAGCAAGAACTTTCCGACTACTAGACACAGATAATCGAATTGTACTACCCATAAATTCACCAATCCGACTAGTAGTG…	ACATCACTTAGTATACTAATTCGAACAGAACTAGGACAACCCGGATCTCTAATTGGAGATGACCAGATCTACAACGTTATCGTTACTGCTCATGCATTCGTCATAATTTTCTTTATGGTCATACCAATCATGATTGGTGGATTTGGAAACTGACTAGTACCACTTATATTAGGAGCCCCAGACATGGCATTCCCACGAATAAACAACATAAGATTTTGATTACTCCCACCATCATTAACATTACTACTTACTAGCAGAACAGTAGAAAGTGGAGCAGGGACAGGATGAACAGTTTACCCCCCTCTTGCGAGAGGTATTGCCCATGCAGGAGCATCCGTAGACTTAGCCATCTTCTCCTTACATCTAGCAGGTGTTTCATCAATTTTGGGAGCAGTAAAT…	AGTGTCATCTTTAAGTCACAACAACCCATTATTTAACTGATTTCTTACTAAATTTTGTACGTTACTAGGGCTGTGACTGATTACTTTCACTGCAAACTGAAACTACAACCGTCTGTATGAGGAACAAGTTACATTTTTTCACTGCTTAAAACAACGGCAGCCGAAGGGACATATTTGCACCAGTTCCATCCAGTCCAAACACACACATAACGATTTATCCAGACACATATCAACGTTATTACGTGACCATC	AGTGTCATCTTTAAGTCACAACAACCCATTATTTAACTGATTTCTTACTAAATTTTGTACGTTACTAGGGCTGTGACTGATTACTTTCACTGCAAACTGAAACTACAACCGTCTGTATGAGGAACAAGTTACATTTTTTCACTGCTTAAAACAACGGCAGCCGAAGGGACATATTTGCACCAGTTCCATCCAGTCCAAACACACACATAACGATTTTTCCAGACACATTTCAACGTTATTACGTGACCATC
R. flavipes	A143	47	119	RfA143_1	MK295467	MK295595	MK295340	-83.0893	34.9452	26	5	30	C	1,3	ACATCACTTAGAATACTAATTCGAACAGAACTAGGGCAACCCGGATCTCTAATTGGAGATGACCAGATCTACAACGTTATCGTTACTGCTCATGCATTCGTCATAATTTTCTTTATAGTCATACCAATCATGATTGGTGGATTCGGAAACTGATTAGTACCACTTATATTAGGAGCCCCAGACATGGCATTCCCACGAATAAACAACATAAGATTTTGATTACTCCCACCATCATTAACATTACTACTTACTAGCAGAACAGTAGAAAGTGGAGCAGGGACAGGATGAACAGTCTACCCCCCTCTTGCGAGAGGTATTGCCCATGCAGGAGCATCCGTAGACTTAGCCATCTTCTCCTTACATCTAGCAGGTGTTTCATCAATTTTGGGAGCAGTAAAT…	TTCTTCCACGATCATACATTAATAATTATATTAATAATCATCACAACCGTTATATACATGATAACCACCCTACTTTGAAATAAACATACTAGACGATTCATACTAGAAGGACAACTAATTGAAACTACATGAACAATTGCACCAGCAATTATCTTAGTATTCATTGCAATACCATCCTTACGACTTCTATATCTAATAGACGAAATCCACAACCCAACAATAACCCTAAAAGCAGTGGGACATCAATGATACTGAAGATATGAATATTCAGACTTCACAAAATTAGAATTCGACTCTTACATAATCCCACAAGAGGAAAATCAAGCAAGAACTTTCCGACTACTAGACACAGATAATCGAATTGTACTACCCATAAATTCACCAATCCGACTAGTAGTG…	ACATCACTTAGAATACTAATTCGAACAGAACTAGGGCAACCCGGATCTCTAATTGGAGATGACCAGATCTACAACGTTATCGTTACTGCTCATGCATTCGTCATAATTTTCTTTATAGTCATACCAATCATGATTGGTGGATTCGGAAACTGATTAGTACCACTTATATTAGGAGCCCCAGACATGGCATTCCCACGAATAAACAACATAAGATTTTGATTACTCCCACCATCATTAACATTACTACTTACTAGCAGAACAGTAGAAAGTGGAGCAGGGACAGGATGAACAGTCTACCCCCCTCTTGCGAGAGGTATTGCCCATGCAGGAGCATCCGTAGACTTAGCCATCTTCTCCTTACATCTAGCAGGTGTTTCATCAATTTTGGGAGCAGTAAAT…	AGTGTCATCTTTAAGTCACAACAACCCATTATTTAACTGATTTCTTACTAAATTTTGTACGTTACTAGGGCTGTGACTGATTACTTTCACTGCAAACTGAAACTACAACCGTCTGTATGAGGAACAAGTTACATTTTTTCACTGCTTAAAACAACGGCAGCCGAAGGGACATATTTGCACCAGTTCCATCCAGTCCAAACACACACATAACGATTTATCCAGACACATATCAACGTTATTACGTGACCATC	AGTGTCATCTTTAAGTCACAACAACCCATTATTTAACTGATTTCTTACTAAATTTTGTACGTTACTAGGGCTGTGACTGATTACTTTCACTGCAAACTGAAACTACAACCGTCTGTATGAGGAACAAGTTACATTTTTTCACTGCTTAAAACAACGGCAGCCGACGGGACATATTTGCACCAGTTCCATCCAGTCCAAACACACACATAACGATTTTTCCAGACACATTTCAACGTTATTACGTGACCATC
R. flavipes	A143	47	120	RfA143_2	MK295468	MK295596	MK295341	-83.0893	34.9452	26	5	30	C	1,3	ACATCACTTAGAATACTAATTCGAACAGAACTAGGGCAACCCGGATCTCTAATTGGAGATGACCAGATCTACAACGTTATCGTTACTGCTCATGCATTCGTCATAATTTTCTTTATAGTCATACCAATCATGATTGGTGGATTCGGAAACTGATTAGTACCACTTATATTAGGAGCCCCAGACATGGCATTCCCACGAATAAACAACATAAGATTTTGATTACTCCCACCATCATTAACATTACTACTTACTAGCAGAACAGTAGAAAGTGGAGCAGGGACAGGATGAACAGTCTACCCCCCTCTTGCGAGAGGTATTGCCCATGCAGGAGCATCCGTAGACTTAGCCATCTTCTCCTTACATCTAGCAGGTGTTTCATCAATTTTGGGAGCAGTAAAT…	TTCTTCCACGATCATACATTAATAATTATATTAATAATCATCACAACCGTTATATACATGATAACCACCCTACTTTGAAATAAACATACTAGACGATTCATACTAGAAGGACAACTAATTGAAACTACATGAACAATTGCACCAGCAATTATCTTAGTATTCATTGCAATACCATCCTTACGACTTCTATATCTAATAGACGAAATCCACAACCCAACAATAACCCTAAAAGCAGTGGGACATCAATGATACTGAAGATATGAATATTCAGACTTCACAAAATTAGAATTCGACTCTTACATAATCCCACAAGAGGAAAATCAAGCAAGAACTTTCCGACTACTAGACACAGATAATCGAATTGTACTACCCATAAATTCACCAATCCGACTAGTAGTG…	ACATCACTTAGAATACTAATTCGAACAGAACTAGGGCAACCCGGATCTCTAATTGGAGATGACCAGATCTACAACGTTATCGTTACTGCTCATGCATTCGTCATAATTTTCTTTATAGTCATACCAATCATGATTGGTGGATTCGGAAACTGATTAGTACCACTTATATTAGGAGCCCCAGACATGGCATTCCCACGAATAAACAACATAAGATTTTGATTACTCCCACCATCATTAACATTACTACTTACTAGCAGAACAGTAGAAAGTGGAGCAGGGACAGGATGAACAGTCTACCCCCCTCTTGCGAGAGGTATTGCCCATGCAGGAGCATCCGTAGACTTAGCCATCTTCTCCTTACATCTAGCAGGTGTTTCATCAATTTTGGGAGCAGTAAAT…	AGTGTCATCTTTAAGTCACAACAACCCATTATTTAACTGATTTCTTACTAAATTTTGTACGTTACTAGGGCTGTGACTGATTACTTTCACTGCAAACTGAAACTACAACCGTCTGTATGAGGAACAAGTTACATTTTTTCACTGCTTAAAACAACGGCAGCCGAAGGGACATATTTGCACCAGTTCCATCCAGTCCAAACACACACATAACGATTTATCCAGACACATATCAACGTTATTACGTGACCATC	AGTGTCATCTTTAAGTCACAACAACCCATTATTTAACTGATTTCTTACTAAATTTTGTACGTTACTAGGGCTGTGACTGATTACTTTCACTGCAAACTGAAACTACAACCGTCTGTATGAGGAACAAGTTACATTTTTTCACTGCTTAAAACAACGGCAGCCGACGGGACATATTTGCACCAGTTCCATCCAGTCCAAACACACACATAACGATTTTTCCAGACACATTTCAACGTTATTACGTGACCATC
R. flavipes	A143	47	121	RfA143_3	MK295469	MK295597	MK295342	-83.0893	34.9452	26	5	30	C	1,3	ACATCACTTAGAATACTAATTCGAACAGAACTAGGGCAACCCGGATCTCTAATTGGAGATGACCAGATCTACAACGTTATCGTTACTGCTCATGCATTCGTCATAATTTTCTTTATAGTCATACCAATCATGATTGGTGGATTCGGAAACTGATTAGTACCACTTATATTAGGAGCCCCAGACATGGCATTCCCACGAATAAACAACATAAGATTTTGATTACTCCCACCATCATTAACATTACTACTTACTAGCAGAACAGTAGAAAGTGGAGCAGGGACAGGATGAACAGTCTACCCCCCTCTTGCGAGAGGTATTGCCCATGCAGGAGCATCCGTAGACTTAGCCATCTTCTCCTTACATCTAGCAGGTGTTTCATCAATTTTGGGAGCAGTAAAT…	TTCTTCCACGATCATACATTAATAATTATATTAATAATCATCACAACCGTTATATACATGATAACCACCCTACTTTGAAATAAACATACTAGACGATTCATACTAGAAGGACAACTAATTGAAACTACATGAACAATTGCACCAGCAATTATCTTAGTATTCATTGCAATACCATCCTTACGACTTCTATATCTAATAGACGAAATCCACAACCCAACAATAACCCTAAAAGCAGTGGGACATCAATGATACTGAAGATATGAATATTCAGACTTCACAAAATTAGAATTCGACTCTTACATAATCCCACAAGAGGAAAATCAAGCAAGAACTTTCCGACTACTAGACACAGATAATCGAATTGTACTACCCATAAATTCACCAATCCGACTAGTAGTG…	ACATCACTTAGAATACTAATTCGAACAGAACTAGGGCAACCCGGATCTCTAATTGGAGATGACCAGATCTACAACGTTATCGTTACTGCTCATGCATTCGTCATAATTTTCTTTATAGTCATACCAATCATGATTGGTGGATTCGGAAACTGATTAGTACCACTTATATTAGGAGCCCCAGACATGGCATTCCCACGAATAAACAACATAAGATTTTGATTACTCCCACCATCATTAACATTACTACTTACTAGCAGAACAGTAGAAAGTGGAGCAGGGACAGGATGAACAGTCTACCCCCCTCTTGCGAGAGGTATTGCCCATGCAGGAGCATCCGTAGACTTAGCCATCTTCTCCTTACATCTAGCAGGTGTTTCATCAATTTTGGGAGCAGTAAAT…	AGTGTCATCTTTAAGTCACAACAACCCATTATTTAACTGATTTCTTACTAAATTTTGTACGTTACTAGGGCTGTGACTGATTACTTTCACTGCAAACTGAAACTACAACCGTCTGTATGAGGAACAAGTTACATTTTTTCACTGCTTAAAACAACGGCAGCCGAAGGGACATATTTGCACCAGTTCCATCCAGTCCAAACACACACATAACGATTTATCCAGACACATATCAACGTTATTACGTGACCATC	AGTGTCATCTTTAAGTCACAACAACCCATTATTTAACTGATTTCTTACTAAATTTTGTACGTTACTAGGGCTGTGACTGATTACTTTCACTGCAAACTGAAACTACAACCGTCTGTATGAGGAACAAGTTACATTTTTTCACTGCTTAAAACAACGGCAGCCGACGGGACATATTTGCACCAGTTCCATCCAGTCCAAACACACACATAACGATTTTTCCAGACACATTTCAACGTTATTACGTGACCATC
R. flavipes	A145	48	122	RfA145b_1	MK295470	MK295598	MK295343	-83.2278	34.7278	27	5	31	C	1,3	ACATCACTTAGAATACTAATTCGAACAGAACTAGGGCAACCCGGATCTCTAATTGGAGATGACCAGATCTACAACGTTATCGTTACCGCTCATGCATTCGTCATAATTTTCTTTATAGTCATACCAATCATGATTGGTGGATTCGGAAACTGATTAGTACCACTTATATTAGGAGCCCCAGACATGGCATTCCCACGAATAAACAACATAAGATTTTGATTACTCCCACCGTCATTAACATTACTACTTACTAGCAGAACAGTAGAAAGTGGAGCAGGGACAGGATGAACAGTCTACCCCCCTCTTGCGAGAGGTATTGCCCATGCAGGAGCATCCGTAGACTTAGCCATCTTCTCCTTACATCTAGCAGGCGTTTCATCAATTTTGGGAGCAGTAAAT…	TTCTTCCACGATCATACATTAATAATTATATTAATAATCATCACAACCGTTATATACATGATAACCACCCTACTTTGAAATAAACATACTAGACGATTCATACTAGAAGGACAACTAATTGAAACTACATGAACAATTGCACCAGCAATTATCTTAGTATTCATTGCAATACCATCCTTACGACTTCTATATCTAATAGACGAAATCCACAACCCAACAATAACCCTAAAAGCAGTGGGACATCAATGATACTGAAGATATGAATATTCAGACTTCACAAAATTAGAATTCGACTCTTACATAATCCCACAAGAGGAAAATCAAGCAAGAACTTTCCGACTACTAGACACAGATAATCGAATTGTACTACCCATAAATTCACCAATCCGACTAGTAGTG…	ACATCACTTAGAATACTAATTCGAACAGAACTAGGGCAACCCGGATCTCTAATTGGAGATGACCAGATCTACAACGTTATCGTTACCGCTCATGCATTCGTCATAATTTTCTTTATAGTCATACCAATCATGATTGGTGGATTCGGAAACTGATTAGTACCACTTATATTAGGAGCCCCAGACATGGCATTCCCACGAATAAACAACATAAGATTTTGATTACTCCCACCGTCATTAACATTACTACTTACTAGCAGAACAGTAGAAAGTGGAGCAGGGACAGGATGAACAGTCTACCCCCCTCTTGCGAGAGGTATTGCCCATGCAGGAGCATCCGTAGACTTAGCCATCTTCTCCTTACATCTAGCAGGCGTTTCATCAATTTTGGGAGCAGTAAAT…	AGTGTCATCTTTAAGTCACAACAACCCATTATTTAACTGATTTCTTACTAAATTTTGTACGTTACTAGGGCTGTGACTGATTACTTTCACTGCAAACTGAAACTACAACCGTCTGTATGAGGAACAAGTTACATTTTTTCACTGCTTAAAACAACGGCAGCCGAAGGGACATATTTGCACCAGTTCCATCCAGTCCAAACACACACATAACGATTTATCCAGACACATATCAACGTTATTACGTGACCATC	AGTGTCATCTTTAAGTCACAACAACCCATTATTTAACTGATTTCTTACTAAATTTTGTACGTTACTAGGGCTGTGACTGATTACTTTCACTGCAAACTGAAACTACAACCGTCTGTATGAGGAACAAGTTACATTTTTTCACTGCTTAAAACAACGGCAGCCGACGGGACATATTTGCACCAGTTCCATCCAGTCCAAACACACACATAACGATTTTTCCAGACACATTTCAACGTTATTACGTGACCATC
R. flavipes	A145	48	123	RfA145b_2	MK295471	MK295599	MK295344	-83.2278	34.7278	27	5	31	C	1,3	ACATCACTTAGAATACTAATTCGAACAGAACTAGGGCAACCCGGATCTCTAATTGGAGATGACCAGATCTACAACGTTATCGTTACCGCTCATGCATTCGTCATAATTTTCTTTATAGTCATACCAATCATGATTGGTGGATTCGGAAACTGATTAGTACCACTTATATTAGGAGCCCCAGACATGGCATTCCCACGAATAAACAACATAAGATTTTGATTACTCCCACCGTCATTAACATTACTACTTACTAGCAGAACAGTAGAAAGTGGAGCAGGGACAGGATGAACAGTCTACCCCCCTCTTGCGAGAGGTATTGCCCATGCAGGAGCATCCGTAGACTTAGCCATCTTCTCCTTACATCTAGCAGGCGTTTCATCAATTTTGGGAGCAGTAAAT…	TTCTTCCACGATCATACATTAATAATTATATTAATAATCATCACAACCGTTATATACATGATAACCACCCTACTTTGAAATAAACATACTAGACGATTCATACTAGAAGGACAACTAATTGAAACTACATGAACAATTGCACCAGCAATTATCTTAGTATTCATTGCAATACCATCCTTACGACTTCTATATCTAATAGACGAAATCCACAACCCAACAATAACCCTAAAAGCAGTGGGACATCAATGATACTGAAGATATGAATATTCAGACTTCACAAAATTAGAATTCGACTCTTACATAATCCCACAAGAGGAAAATCAAGCAAGAACTTTCCGACTACTAGACACAGATAATCGAATTGTACTACCCATAAATTCACCAATCCGACTAGTAGTG…	ACATCACTTAGAATACTAATTCGAACAGAACTAGGGCAACCCGGATCTCTAATTGGAGATGACCAGATCTACAACGTTATCGTTACCGCTCATGCATTCGTCATAATTTTCTTTATAGTCATACCAATCATGATTGGTGGATTCGGAAACTGATTAGTACCACTTATATTAGGAGCCCCAGACATGGCATTCCCACGAATAAACAACATAAGATTTTGATTACTCCCACCGTCATTAACATTACTACTTACTAGCAGAACAGTAGAAAGTGGAGCAGGGACAGGATGAACAGTCTACCCCCCTCTTGCGAGAGGTATTGCCCATGCAGGAGCATCCGTAGACTTAGCCATCTTCTCCTTACATCTAGCAGGCGTTTCATCAATTTTGGGAGCAGTAAAT…	AGTGTCATCTTTAAGTCACAACAACCCATTATTTAACTGATTTCTTACTAAATTTTGTACGTTACTAGGGCTGTGACTGATTACTTTCACTGCAAACTGAAACTACAACCGTCTGTATGAGGAACAAGTTACATTTTTTCACTGCTTAAAACAACGGCAGCCGAAGGGACATATTTGCACCAGTTCCATCCAGTCCAAACACACACATAACGATTTATCCAGACACATATCAACGTTATTACGTGACCATC	AGTGTCATCTTTAAGTCACAACAACCCATTATTTAACTGATTTCTTACTAAATTTTGTACGTTACTAGGGCTGTGACTGATTACTTTCACTGCAAACTGAAACTACAACCGTCTGTATGAGGAACAAGTTACATTTTTTCACTGCTTAAAACAACGGCAGCCGACGGGACATATTTGCACCAGTTCCATCCAGTCCAAACACACACATAACGATTTTTCCAGACACATTTCAACGTTATTACGTGACCATC
R. flavipes	A145	48	124	RfA145b_3	MK295472	MK295600	MK295345	-83.2278	34.7278	27	5	31	C	1,3	ACATCACTTAGAATACTAATTCGAACAGAACTAGGGCAACCCGGATCTCTAATTGGAGATGACCAGATCTACAACGTTATCGTTACCGCTCATGCATTCGTCATAATTTTCTTTATAGTCATACCAATCATGATTGGTGGATTCGGAAACTGATTAGTACCACTTATATTAGGAGCCCCAGACATGGCATTCCCACGAATAAACAACATAAGATTTTGATTACTCCCACCGTCATTAACATTACTACTTACTAGCAGAACAGTAGAAAGTGGAGCAGGGACAGGATGAACAGTCTACCCCCCTCTTGCGAGAGGTATTGCCCATGCAGGAGCATCCGTAGACTTAGCCATCTTCTCCTTACATCTAGCAGGCGTTTCATCAATTTTGGGAGCAGTAAAT…	TTCTTCCACGATCATACATTAATAATTATATTAATAATCATCACAACCGTTATATACATGATAACCACCCTACTTTGAAATAAACATACTAGACGATTCATACTAGAAGGACAACTAATTGAAACTACATGAACAATTGCACCAGCAATTATCTTAGTATTCATTGCAATACCATCCTTACGACTTCTATATCTAATAGACGAAATCCACAACCCAACAATAACCCTAAAAGCAGTGGGACATCAATGATACTGAAGATATGAATATTCAGACTTCACAAAATTAGAATTCGACTCTTACATAATCCCACAAGAGGAAAATCAAGCAAGAACTTTCCGACTACTAGACACAGATAATCGAATTGTACTACCCATAAATTCACCAATCCGACTAGTAGTG…	ACATCACTTAGAATACTAATTCGAACAGAACTAGGGCAACCCGGATCTCTAATTGGAGATGACCAGATCTACAACGTTATCGTTACCGCTCATGCATTCGTCATAATTTTCTTTATAGTCATACCAATCATGATTGGTGGATTCGGAAACTGATTAGTACCACTTATATTAGGAGCCCCAGACATGGCATTCCCACGAATAAACAACATAAGATTTTGATTACTCCCACCGTCATTAACATTACTACTTACTAGCAGAACAGTAGAAAGTGGAGCAGGGACAGGATGAACAGTCTACCCCCCTCTTGCGAGAGGTATTGCCCATGCAGGAGCATCCGTAGACTTAGCCATCTTCTCCTTACATCTAGCAGGCGTTTCATCAATTTTGGGAGCAGTAAAT…	AGTGTCATCTTTAAGTCACAACAACCCATTATTTAACTGATTTCTTACTAAATTTTGTACGTTACTAGGGCTGTGACTGATTACTTTCACTGCAAACTGAAACTACAACCGTCTGTATGAGGAACAAGTTACATTTTTTCACTGCTTAAAACAACGGCAGCCGAAGGGACATATTTGCACCAGTTCCATCCAGTCCAAACACACACATAACGATTTATCCAGACACATATCAACGTTATTACGTGACCATC	AGTGTCATCTTTAAGTCACAACAACCCATTATTTAACTGATTTCTTACTAAATTTTGTACGTTACTAGGGCTGTGACTGATTACTTTCACTGCAAACTGAAACTACAACCGTCTGTATGAGGAACAAGTTACATTTTTTCACTGCTTAAAACAACGGCAGCCGACGGGACATATTTGCACCAGTTCCATCCAGTCCAAACACACACATAACGATTTTTCCAGACACATTTCAACGTTATTACGTGACCATC
R. flavipes	A145	49	125	RfA145c_1	MK295473	MK295601	MK295346	-83.2278	34.7278	16	5	19	C	1,3	ACATCACTTAGAATGCTAATTCGAACAGAACTAGGGCAACCCGGATCTCTAATTGGAGATGACCAGATCTACAACGTTATCGTTACTGCTCATGCATTCGTCATAATTTTCTTTATAGTCATACCAATCATGATTGGTGGATTCGGAAACTGATTAGTACCACTTATATTAGGAGCCCCAGACATGGCATTCCCACGAATAAACAACATAAGATTTTGATTACTCCCACCATCATTAACATTACTACTTACTAGCAGAACAGTAGAAAGTGGAGCAGGGACAGGATGAACAGTCTACCCCCCTCTTGCGAGAGGTATTGCCCATGCAGGAGCATCCGTAGACTTAGCCATCTTCTCCTTACATCTAGCAGGTGTTTCATCAATTTTGGGAGCAGTAAAT…	TTCTTCCACGATCATACATTAATAATTATATTAATAATCATCACAACCGTTATATACATGATAACCACCCTACTTTGAAATAAACATACTAGACGATTCATACTAGAAGGACAACTAATTGAAACTACATGAACAATTGCACCAGCAATTATCTTAGTATTCATTGCAATACCATCCTTACGACTTCTATATCTAATAGACGAAATCCACAACCCAACAATAACCCTAAAAGCAGTGGGACATCAATGATACTGAAGATATGAATATTCAGACTTCACAAAATTAGAATTCGACTCTTACATAATCCCACAAGAGGAAAATCAAGCAAGAACTTTCCGACTACTAGACACAGATAATCGAATTGTACTACCCATAAATTCACCAATCCGACTAGTAGTG…	ACATCACTTAGAATGCTAATTCGAACAGAACTAGGGCAACCCGGATCTCTAATTGGAGATGACCAGATCTACAACGTTATCGTTACTGCTCATGCATTCGTCATAATTTTCTTTATAGTCATACCAATCATGATTGGTGGATTCGGAAACTGATTAGTACCACTTATATTAGGAGCCCCAGACATGGCATTCCCACGAATAAACAACATAAGATTTTGATTACTCCCACCATCATTAACATTACTACTTACTAGCAGAACAGTAGAAAGTGGAGCAGGGACAGGATGAACAGTCTACCCCCCTCTTGCGAGAGGTATTGCCCATGCAGGAGCATCCGTAGACTTAGCCATCTTCTCCTTACATCTAGCAGGTGTTTCATCAATTTTGGGAGCAGTAAAT…	AGTGTCATCTTTAAGTCACAACAACCCATTATTTAACTGATTTCTTACTAAATTTTGTACGTTACTAGGGCTGTGACTGATTACTTTCACTGCAAACTGAAACTACAACCGTCTGTATGAGGAACAAGTTACATTTTTTCACTGCTTAAAACAACGGCAGCCGAAGGGACATATTTGCACCAGTTCCATCCAGTCCAAACACACACATAACGATTTATCCAGACACATATCAACGTTATTACGTGACCATC	AGTGTCATCTTTAAGTCACAACAACCCATTATTTAACTGATTTCTTACTAAATTTTGTACGTTACTAGGGCTGTGACTGATTACTTTCACTGCAAACTGAAACTACAACCGTCTGTATGAGGAACAAGTTACATTTTTTCACTGCTTAAAACAACGGCAGCCGACGGGACATATTTGCACCAGTTCCATCCAGTCCAAACACACACATAACGATTTTTCCAGACACATTTCAACGTTATTACGTGACCATC
R. flavipes	A145	49	126	RfA145c_2	MK295474	MK295602	MK295347	-83.2278	34.7278	16	5	19	C	1,3	ACATCACTTAGAATGCTAATTCGAACAGAACTAGGGCAACCCGGATCTCTAATTGGAGATGACCAGATCTACAACGTTATCGTTACTGCTCATGCATTCGTCATAATTTTCTTTATAGTCATACCAATCATGATTGGTGGATTCGGAAACTGATTAGTACCACTTATATTAGGAGCCCCAGACATGGCATTCCCACGAATAAACAACATAAGATTTTGATTACTCCCACCATCATTAACATTACTACTTACTAGCAGAACAGTAGAAAGTGGAGCAGGGACAGGATGAACAGTCTACCCCCCTCTTGCGAGAGGTATTGCCCATGCAGGAGCATCCGTAGACTTAGCCATCTTCTCCTTACATCTAGCAGGTGTTTCATCAATTTTGGGAGCAGTAAAT…	TTCTTCCACGATCATACATTAATAATTATATTAATAATCATCACAACCGTTATATACATGATAACCACCCTACTTTGAAATAAACATACTAGACGATTCATACTAGAAGGACAACTAATTGAAACTACATGAACAATTGCACCAGCAATTATCTTAGTATTCATTGCAATACCATCCTTACGACTTCTATATCTAATAGACGAAATCCACAACCCAACAATAACCCTAAAAGCAGTGGGACATCAATGATACTGAAGATATGAATATTCAGACTTCACAAAATTAGAATTCGACTCTTACATAATCCCACAAGAGGAAAATCAAGCAAGAACTTTCCGACTACTAGACACAGATAATCGAATTGTACTACCCATAAATTCACCAATCCGACTAGTAGTG…	ACATCACTTAGAATGCTAATTCGAACAGAACTAGGGCAACCCGGATCTCTAATTGGAGATGACCAGATCTACAACGTTATCGTTACTGCTCATGCATTCGTCATAATTTTCTTTATAGTCATACCAATCATGATTGGTGGATTCGGAAACTGATTAGTACCACTTATATTAGGAGCCCCAGACATGGCATTCCCACGAATAAACAACATAAGATTTTGATTACTCCCACCATCATTAACATTACTACTTACTAGCAGAACAGTAGAAAGTGGAGCAGGGACAGGATGAACAGTCTACCCCCCTCTTGCGAGAGGTATTGCCCATGCAGGAGCATCCGTAGACTTAGCCATCTTCTCCTTACATCTAGCAGGTGTTTCATCAATTTTGGGAGCAGTAAAT…	AGTGTCATCTTTAAGTCACAACAACCCATTATTTAACTGATTTCTTACTAAATTTTGTACGTTACTAGGGCTGTGACTGATTACTTTCACTGCAAACTGAAACTACAACCGTCTGTATGAGGAACAAGTTACATTTTTTCACTGCTTAAAACAACGGCAGCCGAAGGGACATATTTGCACCAGTTCCATCCAGTCCAAACACACACATAACGATTTATCCAGACACATATCAACGTTATTACGTGACCATC	AGTGTCATCTTTAAGTCACAACAACCCATTATTTAACTGATTTCTTACTAAATTTTGTACGTTACTAGGGCTGTGACTGATTACTTTCACTGCAAACTGAAACTACAACCGTCTGTATGAGGAACAAGTTACATTTTTTCACTGCTTAAAACAACGGCAGCCGACGGGACATATTTGCACCAGTTCCATCCAGTCCAAACACACACATAACGATTTTTCCAGACACATTTCAACGTTATTACGTGACCATC
R. flavipes	A145	49	127	RfA145c_3	MK295475	MK295603	MK295348	-83.2278	34.7278	16	5	19	C	1,3	ACATCACTTAGAATGCTAATTCGAACAGAACTAGGGCAACCCGGATCTCTAATTGGAGATGACCAGATCTACAACGTTATCGTTACTGCTCATGCATTCGTCATAATTTTCTTTATAGTCATACCAATCATGATTGGTGGATTCGGAAACTGATTAGTACCACTTATATTAGGAGCCCCAGACATGGCATTCCCACGAATAAACAACATAAGATTTTGATTACTCCCACCATCATTAACATTACTACTTACTAGCAGAACAGTAGAAAGTGGAGCAGGGACAGGATGAACAGTCTACCCCCCTCTTGCGAGAGGTATTGCCCATGCAGGAGCATCCGTAGACTTAGCCATCTTCTCCTTACATCTAGCAGGTGTTTCATCAATTTTGGGAGCAGTAAAT…	TTCTTCCACGATCATACATTAATAATTATATTAATAATCATCACAACCGTTATATACATGATAACCACCCTACTTTGAAATAAACATACTAGACGATTCATACTAGAAGGACAACTAATTGAAACTACATGAACAATTGCACCAGCAATTATCTTAGTATTCATTGCAATACCATCCTTACGACTTCTATATCTAATAGACGAAATCCACAACCCAACAATAACCCTAAAAGCAGTGGGACATCAATGATACTGAAGATATGAATATTCAGACTTCACAAAATTAGAATTCGACTCTTACATAATCCCACAAGAGGAAAATCAAGCAAGAACTTTCCGACTACTAGACACAGATAATCGAATTGTACTACCCATAAATTCACCAATCCGACTAGTAGTG…	ACATCACTTAGAATGCTAATTCGAACAGAACTAGGGCAACCCGGATCTCTAATTGGAGATGACCAGATCTACAACGTTATCGTTACTGCTCATGCATTCGTCATAATTTTCTTTATAGTCATACCAATCATGATTGGTGGATTCGGAAACTGATTAGTACCACTTATATTAGGAGCCCCAGACATGGCATTCCCACGAATAAACAACATAAGATTTTGATTACTCCCACCATCATTAACATTACTACTTACTAGCAGAACAGTAGAAAGTGGAGCAGGGACAGGATGAACAGTCTACCCCCCTCTTGCGAGAGGTATTGCCCATGCAGGAGCATCCGTAGACTTAGCCATCTTCTCCTTACATCTAGCAGGTGTTTCATCAATTTTGGGAGCAGTAAAT…	AGTGTCATCTTTAAGTCACAACAACCCATTATTTAACTGATTTCTTACTAAATTTTGTACGTTACTAGGGCTGTGACTGATTACTTTCACTGCAAACTGAAACTACAACCGTCTGTATGAGGAACAAGTTACATTTTTTCACTGCTTAAAACAACGGCAGCCGAAGGGACATATTTGCACCAGTTCCATCCAGTCCAAACACACACATAACGATTTATCCAGACACATATCAACGTTATTACGTGACCATC	AGTGTCATCTTTAAGTCACAACAACCCATTATTTAACTGATTTCTTACTAAATTTTGTACGTTACTAGGGCTGTGACTGATTACTTTCACTGCAAACTGAAACTACAACCGTCTGTATGAGGAACAAGTTACATTTTTTCACTGCTTAAAACAACGGCAGCCGACGGGACATATTTGCACCAGTTCCATCCAGTCCAAACACACACATAACGATTTTTCCAGACACATTTCAACGTTATTACGTGACCATC
R. flavipes	A146	50	128	RfA146b_1	MK295476	MK295604	x	-83.3124	34.7775	28	18	32	C	x	ACATCACTTAGAATACTAATTCGAACAGAACTAGGGCAACCCGGATCTCTAATTGGAGATGACCAGATCTACAACGTTATCGTTACTGCTCATGCATTCGTCATAATTTTCTTTATAGTCATACCAATCATGATTGGTGGATTCGGAAACTGATTAGTACCACTTATATTAGGAGCCCCAGACATGGCATTCCCACGAATAAACAACATAAGATTTTGATTACTCCCACCATCATTAACATTACTACTTACTAGCAGAACAGTAGAAAGTGGAGCAGGGACAGGATGAACAGTCTACCCCCCTCTTGCGAGAGGTATTGCCCATGCAGGAGCATCCGTAGACCTAGCCATCTTCTCCTTACATCTAGCAGGTGTTTCATCAATTTTGGGAGCAGTAAAT…	TTCTTCCACGATCATACATTAATAATTATATTAATAATCATCACAACCGTTATATACATGATAACCACCCTACTTTGAAATAAACATACTAGACGATTCATACTAGAAGGACAATTAATTGAAACTACATGAACAATTGCACCAGCAATTATCTTAGTATTCATTGCAATACCATCCTTACGACTTCTATATCTAATAGACGAAATCCACAACCCAACAATAACCCTAAAAGCAGTGGGACATCAATGATACTGAAGATATGAATATTCAGACTTCACAAAATTAGAATTCGACTCTTACATAATCCCACAAGAGGAAAATCAAGCAAGAACTTTCCGACTACTAGACACAGATAATCGAATTGTACTACCCATAAATTCACCAATCCGACTAGTAGTG…	ACATCACTTAGAATACTAATTCGAACAGAACTAGGGCAACCCGGATCTCTAATTGGAGATGACCAGATCTACAACGTTATCGTTACTGCTCATGCATTCGTCATAATTTTCTTTATAGTCATACCAATCATGATTGGTGGATTCGGAAACTGATTAGTACCACTTATATTAGGAGCCCCAGACATGGCATTCCCACGAATAAACAACATAAGATTTTGATTACTCCCACCATCATTAACATTACTACTTACTAGCAGAACAGTAGAAAGTGGAGCAGGGACAGGATGAACAGTCTACCCCCCTCTTGCGAGAGGTATTGCCCATGCAGGAGCATCCGTAGACCTAGCCATCTTCTCCTTACATCTAGCAGGTGTTTCATCAATTTTGGGAGCAGTAAAT…	x	x
Out-Group
R. malletei	A06			RfA06_1	MK295477	MK295605	MK295349	-85.2163	34.6434	Out1	Out1	Out1	N/A	Out1,Out1	ACATCACTCAGAATACTAATTCGGACAGAATTAGGACAACCTGGATCTCTAATTGGAGACGACCAGATCTACAACGTTATCGTTACCGCCCACGCATTTGTTATGATTTTCTTTATGGTTATACCAATCATAATCGGTGGATTCGGGAACTGACTAGTACCACTTATATTAGGAGCCCCAGATATGGCATTCCCACGAATAAATAACATAAGATTTTGATTACTCCCACCATCATTAACACTACTACTTACTAGTAGAACAGTAGAAAGTGGAGCAGGGACGGGATGAACAGTTTACCCTCCTCTTGCAAGAGGAATTGCCCACGCAGGAGCATCCGTAGACTTAGCAATCTTTTCTTTACATTTAGCAGGTGTATCATCAATTCTGGGAGCAGTAAAC…	TTCTTCCATGACCATACATTAATAATTATACTAATAATCATCACAACCGTGATGTACATAATAACCACCCTACTTTGAAATAAACACACCAGACGATTCATATTAGAAGGACAACTAATTGAAACCACATGAACAATTGCACCAGCAATCATCCTAGTATTCATTGCGATACCATCCTTACGACTTCTATATCTAATAGACGAAATCCACAACCCAACAATAACCCTAAAAGCAGTAGGACACCAATGATACTGGAGATATGAATACTCAGACTTCACAAAATTAGAATTTGACTCTTACATAATTCCACAAGAGGAAAATCAAGCAAGAACCTTCCGACTATTAGACACAGACAACCGAATTGTACTACCCATAAATTCACCAATCCGATTAGTAGTA…	ACATCACTCAGAATACTAATTCGGACAGAATTAGGACAACCTGGATCTCTAATTGGAGACGACCAGATCTACAACGTTATCGTTACCGCCCACGCATTTGTTATGATTTTCTTTATGGTTATACCAATCATAATCGGTGGATTCGGGAACTGACTAGTACCACTTATATTAGGAGCCCCAGATATGGCATTCCCACGAATAAATAACATAAGATTTTGATTACTCCCACCATCATTAACACTACTACTTACTAGTAGAACAGTAGAAAGTGGAGCAGGGACGGGATGAACAGTTTACCCTCCTCTTGCAAGAGGAATTGCCCACGCAGGAGCATCCGTAGACTTAGCAATCTTTTCTTTACATTTAGCAGGTGTATCATCAATTCTGGGAGCAGTAAAC…	AGTGTCATCTTTAAGTCACAACAACCCATTATTTAACTGATTTCTTACTAAATTTTGTACGTTACTAGGGCTGTGACTGATTACTTTCACTGCAAACTGAAACTACAACCGTCTGTATGAGGAACAAGTTACATTTTTTCACTGCTTAAAACAACGGCAGCCGACGGGACATATTTGCACCAGTTCCATCCAGTCCAAACACACACATAACGATTTATCCAGACACATTTCAACGTTATTACGTGACCATC	AGTGTCATCTTTAAGTCACAACAACCCATTATTTAACTGATTTCTTACTAAATTTTGTACGTTACTAGGGCTGTGACTGATTACTTTCACTGCAAACTGAAACTACAACCGTCTGTATGAGGAACAAGTTACATTTTTTCACTGCTTAAAACAACGGCAGCCGACGGGACATATTTGCACCAGTTCCATCCAGTCCAAACACACACATAACGATTTATCCAGACACATTTCAACGTTATTACGTGACCATC
R. nelsonae	A12			RfA12_1	MK295478	MK295606	MK295350	-85.6939	33.5716	Out2	Out2	Out2	N/A	Out1,Out1	ACATCACTCAGAATACTAATTCGAACAGAATTAGGACAACCCGGATCTCTAATTGGAGACGACCAGATCTACAATGTTATCGTTACTGCCCACGCATTTGTTATGATTTTCTTTATGGTTATACCAATCATAATTGGTGGATTCGGGAACTGACTAGTACCACTTATGCTAGGAGCCCCGGATATGGCATTCCCACGAATAAACAACATAAGATTTTGATTACTCCCACCATCATTAACACTACTACTCACTAGTAGAACAGTAGAAAGTGGAGCGGGGACTGGATGAACAGTTTACCCCCCTCTTGCAAGAGGGATTGCCCATGCAGGAGCATCCGTAGACTTAGCCATCTTTTCTTTACACTTAGCAGGTGTATCATCAATTCTGGGAGCAGTAAAC…	TTCTTCCACGACCATACATTAATAATTATACTAATAATCATCACAACCGTAATGTACATAATAACCACCCTACTTTGAAACAAACACACTAGACGATTTATATTAGAAGGACAACTAATCGAAACCACATGAACAATTGCACCAGCAATCATCCTAGTATTCATCGCGATACCATCCTTACGACTTCTATATCTAATAGACGAAATCCACAACCCAACAATAACCCTAAAAGCAGTAGGACACCAGTGATACTGAAGATATGAATATTCAGACTTCACAAAATTAGAATTTGACTCTTACATAATTCCACAAGAGGAAAATCAAGCAAGAACCTTCCGACTATTAGACACAGACAACCGAATTGTACTACCCATAAACTCACCAATCCGATTAGTAGTA…	ACATCACTCAGAATACTAATTCGAACAGAATTAGGACAACCCGGATCTCTAATTGGAGACGACCAGATCTACAATGTTATCGTTACTGCCCACGCATTTGTTATGATTTTCTTTATGGTTATACCAATCATAATTGGTGGATTCGGGAACTGACTAGTACCACTTATGCTAGGAGCCCCGGATATGGCATTCCCACGAATAAACAACATAAGATTTTGATTACTCCCACCATCATTAACACTACTACTCACTAGTAGAACAGTAGAAAGTGGAGCGGGGACTGGATGAACAGTTTACCCCCCTCTTGCAAGAGGGATTGCCCATGCAGGAGCATCCGTAGACTTAGCCATCTTTTCTTTACACTTAGCAGGTGTATCATCAATTCTGGGAGCAGTAAAC…	AGTGTCATCTTTAAGTCACAACAACCCATTATTTAACTGATTTCTTACTAAATTTTGTACGTTACTAGGGCTGTGACTGATTACTTTCACTGCAAACTGAAACTACAACCGTCTGTATGAGGAACAAGTTACATTTTTTCACTGCTTAAAACAACGGCAGCCGACGGGACATATTTGCACCAGTTCCATCCAGTCCAAACACACACATAACGATTTATCCAGACACATTTCAACGTTATTACGTGACCATC	AGTGTCATCTTTAAGTCACAACAACCCATTATTTAACTGATTTCTTACTAAATTTTGTACGTTACTAGGGCTGTGACTGATTACTTTCACTGCAAACTGAAACTACAACCGTCTGTATGAGGAACAAGTTACATTTTTTCACTGCTTAAAACAACGGCAGCCGACGGGACATATTTGCACCAGTTCCATCCAGTCCAAACACACACATAACGATTTATCCAGACACATTTCAACGTTATTACGTGACCATC
R. virginicus	A10			RfA10_1	MK295479	MK295607	MK295351	-85.2404	34.5642	Out3	Out3	Out3	N/A	Out2,Out2	ACATCACTCAGAATACTAATTCGAACAGAATTAGGACAACCTGGTTCTCTGATTGGAGACGATCAGATCTACAACGTCATCGTTACCGCCCACGCATTCGTTATAATCTTCTTTATGGTTATACCAATCATAATTGGTGGATTCGGAAACTGACTAGTACCACTTATATTAGGAGCCCCAGATATGGCATTCCCACGAATAAACAACATAAGATTTTGATTACTCCCACCATCATTAACTCTACTACTCACTAGTAGAACTGTAGAAAGTGGAGCAGGGACGGGATGAACAGTTTATCCCCCTCTTGCAAGAGGTATTGCCCATGCAGGGGCATCTGTAGACTTAGCCATCTTCTCCTTACACCTAGCAGGTGTATCATCAATCCTAGGGGCAGTAAAC…	TTCTTCCACGACCATACATTAATAATTATATTAATAATCATTACAACCGTAATGTACATAATAACCACCCTACTCTGAAATAAGCACACTAGACGATTTATATTAGAAGGACAACTAATTGAAACCACATGAACAATTGCACCGGCAATCATCCTAGTATTCATTGCGATACCATCTTTACGACTTCTATATCTAATAGACGAAATCCATAACCCAACAATAACCCTAAAAGCAGTGGGACACCAATGATACTGGAGATACGAATACTCAGACTTCACAAAATTAGAATTTGACTCTTACATAATTCCACAGGAGGAAAATCAAATAAGAACCTTCCGACTACTAGACACAGACAACCGAATTGTACTGCCCATAAATTCACCAATCCGATTAGTAGTA…	ACATCACTCAGAATACTAATTCGAACAGAATTAGGACAACCTGGTTCTCTGATTGGAGACGATCAGATCTACAACGTCATCGTTACCGCCCACGCATTCGTTATAATCTTCTTTATGGTTATACCAATCATAATTGGTGGATTCGGAAACTGACTAGTACCACTTATATTAGGAGCCCCAGATATGGCATTCCCACGAATAAACAACATAAGATTTTGATTACTCCCACCATCATTAACTCTACTACTCACTAGTAGAACTGTAGAAAGTGGAGCAGGGACGGGATGAACAGTTTATCCCCCTCTTGCAAGAGGTATTGCCCATGCAGGGGCATCTGTAGACTTAGCCATCTTCTCCTTACACCTAGCAGGTGTATCATCAATCCTAGGGGCAGTAAAC…	AGTGTCATCTTTAAGTCACAACAACCCATTATTTAACTGATTTCTTACTAAATTTTGTACGTTACTAGGGCTGTGACTGATTACTTTCACTGCAAACTGAAACTACAACCGTCTGTATGAGGAACAAGTTACATTTTTTCACTGCTTAAAACAACGGCAGCCGACGGGACATATTTGCACCAGTTCCATCCAGTCAAAACACACACATAACGATTTATCCAGACACATTTCAACGTTATTACGTGACCATC	AGTGTCATCTTTAAGTCACAACAACCCATTATTTAACTGATTTCTTACTAAATTTTGTACGTTACTAGGGCTGTGACTGATTACTTTCACTGCAAACTGAAACTACAACCGTCTGTATGAGGAACAAGTTACATTTTTTCACTGCTTAAAACAACGGCAGCCGACGGGACATATTTGCACCAGTTCCATCCAGTCAAAACACACACATAACGATTTATCCAGACACATTTCAACGTTATTACGTGACCATC
R. virginicus	A25			RfA25b_1	MK295480	MK295608	MK295352	-83.7327	34.7419	Out4	Out4	Out4	N/A	Out2,Out2	ACATCACTCAGAATACTAATTCGAACAGAATTAGGACAACCCGGGTCTCTGATTGGAGACGACCAGATCTACAACGTCATCGTTACCGCCCACGCATTTGTTATAATCTTCTTTATGGTTATACCAATCATAATTGGTGGATTCGGAAACTGACTAGTACCACTTATATTAGGAGCCCCAGATATGGCATTCCCACGAATAAACAACATAAGATTTTGATTACTCCCACCATCATTAACTCTACTACTCACTAGTAGAACTGTAGAAAGTGGAGCAGGGACGGGATGAACAGTTTATCCCCCTCTTGCAAGAGGTATTGCCCATGCAGGAGCATCTGTAGACTTAGCCATCTTCTCCCTACACCTAGCAGGTGTATCATCAATCCTAGGGGCAGTAAAC…	TTCTTCCACGACCATACATTAATAATTATATTAATAATCATTACAACCGTAATGTACATAATAACCACCCTACTCTGAAATAAGCACACTAGACGATTTATATTAGAAGGACAACTAATTGAAACCACATGAACAATTGCACCGGCAATCATCCTAGTATTCATTGCGATACCATCTTTACGACTTCTATATCTAATAGACGAAATCCATAACCCAACAATAACCCTAAAAGCAGTAGGACACCAATGATACTGGAGATACGAATACTCAGACTTCACAAAATTAGAATTTGACTCTTACATAATTCCACAGGAGGAAAATCAAACAAGAACCTTCCGACTACTAGACACAGACAACCGAATTGTACTCCCCATAAATTCACCAATCCGATTAGTAGTA…	ACATCACTCAGAATACTAATTCGAACAGAATTAGGACAACCCGGGTCTCTGATTGGAGACGACCAGATCTACAACGTCATCGTTACCGCCCACGCATTTGTTATAATCTTCTTTATGGTTATACCAATCATAATTGGTGGATTCGGAAACTGACTAGTACCACTTATATTAGGAGCCCCAGATATGGCATTCCCACGAATAAACAACATAAGATTTTGATTACTCCCACCATCATTAACTCTACTACTCACTAGTAGAACTGTAGAAAGTGGAGCAGGGACGGGATGAACAGTTTATCCCCCTCTTGCAAGAGGTATTGCCCATGCAGGAGCATCTGTAGACTTAGCCATCTTCTCCCTACACCTAGCAGGTGTATCATCAATCCTAGGGGCAGTAAAC…	AGTGTCATCTTTAAGTCACAACAACCCATTATTTAACTGATTTCTTACTAAATTTTGTACGTTACTAGGGCTGTGACTGATTACTTTCACTGCAAACTGAAACTACAACCGTCTGTATGAGGAACAAGTTACATTTTTTCACTGCTTAAAACAACGGCAGCCGACGGGACATATTTGCACCAGTTCCATCCAGTCAAAACACACACATAACGATTTATCCAGACACATTTCAACGTTATTACGTGACCATC	AGTGTCATCTTTAAGTCACAACAACCCATTATTTAACTGATTTCTTACTAAATTTTGTACGTTACTAGGGCTGTGACTGATTACTTTCACTGCAAACTGAAACTACAACCGTCTGTATGAGGAACAAGTTACATTTTTTCACTGCTTAAAACAACGGCAGCCGACGGGACATATTTGCACCAGTTCCATCCAGTCAAAACACACACATAACGATTTATCCAGACACATTTCAACGTTATTACGTGACCATC
R. virginicus	A146			RfA146b_2	MK295481	MK295609	MK295353	-83.3124	34.7775	Out5	Out5	Out5	N/A	Out3,Out3	ACATCACTCAGAATACTAATTCGAACAGAATTAGGACAACCCGGGTCTCTGATTGGAGACGACCAGATCTACAACGTTATCGTTACCGCCCACGCATTTGTTATAATCTTCTTTATGGTTATACCAATCATAATTGGTGGATTCGGAAACTGACTAGTACCACTTATATTAGGAGCCCCAGATATGGCATTCCCACGAATAAACAACATAAGATTTTGATTACTCCCACCATCATTAACTCTACTACTCACTAGTAGAACTGTAGAAAGTGGAGCAGGGACGGGATGAACAGTTTATCCCCCTCTTGCAAGAGGTATTGCCCATGCAGGAGCATCTGTAGACTTAGCCATCTTCTCCCTACACCTAGCAGGTGTATCATCAATCCTAGGGGCAGTAAAC…	TTCTTCCACGACCATACATTAATAATTATATTAATAATCATTACAACCGTAATGTACATAATAACCACCCTACTCTGAAATAAGCACACTAGACGATTTATATTAGAAGGACAACTAATTGAAACCACATGAACAATTGCACCGGCAATCATCCTAGTATTCATTGCAATACCATCTTTACGACTTCTATATCTAATAGACGAAATCCATAACCCAACAATAACCCTAAAAGCAGTAGGACACCAATGATACTGGAGATACGAATACTCAGACTTCACAAAATTAGAATTTGACTCTTACATAATTCCACAGGAGGAAAATCAAACAAGAACCTTCCGACTACTAGACACAGACAACCGAATTGTACTGCCCATAAATTCACCAATCCGATTAGTAGTA…	ACATCACTCAGAATACTAATTCGAACAGAATTAGGACAACCCGGGTCTCTGATTGGAGACGACCAGATCTACAACGTTATCGTTACCGCCCACGCATTTGTTATAATCTTCTTTATGGTTATACCAATCATAATTGGTGGATTCGGAAACTGACTAGTACCACTTATATTAGGAGCCCCAGATATGGCATTCCCACGAATAAACAACATAAGATTTTGATTACTCCCACCATCATTAACTCTACTACTCACTAGTAGAACTGTAGAAAGTGGAGCAGGGACGGGATGAACAGTTTATCCCCCTCTTGCAAGAGGTATTGCCCATGCAGGAGCATCTGTAGACTTAGCCATCTTCTCCCTACACCTAGCAGGTGTATCATCAATCCTAGGGGCAGTAAAC…	AGTGTCATCTTTAAGTCACAACAACCCATTACTTAACTGATTTCTTACTAAATTTTGTACGTTACTAGGGCTGTGACTGATTACTTTCACTGCAAACTGAAACTACAACCGTCTGTATGAGGAACAAGTTACATTTTTTCACTGCTTAAAACAACGGCAGCCGACGGGACATATTTGCACCAGTTCCATCCAGTCAAAACACACACATAACGATTTATCCAGACACATTTCAACGTTATTACGTGACCATC	AGTGTCATCTTTAAGTCACAACAACCCATTACTTAACTGATTTCTTACTAAATTTTGTACGTTACTAGGGCTGTGACTGATTACTTTCACTGCAAACTGAAACTACAACCGTCTGTATGAGGAACAAGTTACATTTTTTCACTGCTTAAAACAACGGCAGCCGACGGGACATATTTGCACCAGTTCCATCCAGTCAAAACACACACATAACGATTTATCCAGACACATTTCAACGTTATTACGTGACCATC
R. virginicus	A146			RfA146b_3	MK295482	MK295610	MK295354	-83.3124	34.7775	Out5	Out5	Out5	N/A	Out3,Out3	ACATCACTCAGAATACTAATTCGAACAGAATTAGGACAACCCGGGTCTCTGATTGGAGACGACCAGATCTACAACGTTATCGTTACCGCCCACGCATTTGTTATAATCTTCTTTATGGTTATACCAATCATAATTGGTGGATTCGGAAACTGACTAGTACCACTTATATTAGGAGCCCCAGATATGGCATTCCCACGAATAAACAACATAAGATTTTGATTACTCCCACCATCATTAACTCTACTACTCACTAGTAGAACTGTAGAAAGTGGAGCAGGGACGGGATGAACAGTTTATCCCCCTCTTGCAAGAGGTATTGCCCATGCAGGAGCATCTGTAGACTTAGCCATCTTCTCCCTACACCTAGCAGGTGTATCATCAATCCTAGGGGCAGTAAAC…	TTCTTCCACGACCATACATTAATAATTATATTAATAATCATTACAACCGTAATGTACATAATAACCACCCTACTCTGAAATAAGCACACTAGACGATTTATATTAGAAGGACAACTAATTGAAACCACATGAACAATTGCACCGGCAATCATCCTAGTATTCATTGCAATACCATCTTTACGACTTCTATATCTAATAGACGAAATCCATAACCCAACAATAACCCTAAAAGCAGTAGGACACCAATGATACTGGAGATACGAATACTCAGACTTCACAAAATTAGAATTTGACTCTTACATAATTCCACAGGAGGAAAATCAAACAAGAACCTTCCGACTACTAGACACAGACAACCGAATTGTACTGCCCATAAATTCACCAATCCGATTAGTAGTA…	ACATCACTCAGAATACTAATTCGAACAGAATTAGGACAACCCGGGTCTCTGATTGGAGACGACCAGATCTACAACGTTATCGTTACCGCCCACGCATTTGTTATAATCTTCTTTATGGTTATACCAATCATAATTGGTGGATTCGGAAACTGACTAGTACCACTTATATTAGGAGCCCCAGATATGGCATTCCCACGAATAAACAACATAAGATTTTGATTACTCCCACCATCATTAACTCTACTACTCACTAGTAGAACTGTAGAAAGTGGAGCAGGGACGGGATGAACAGTTTATCCCCCTCTTGCAAGAGGTATTGCCCATGCAGGAGCATCTGTAGACTTAGCCATCTTCTCCCTACACCTAGCAGGTGTATCATCAATCCTAGGGGCAGTAAAC…	AGTGTCATCTTTAAGTCACAACAACCCATTACTTAACTGATTTCTTACTAAATTTTGTACGTTACTAGGGCTGTGACTGATTACTTTCACTGCAAACTGAAACTACAACCGTCTGTATGAGGAACAAGTTACATTTTTTCACTGCTTAAAACAACGGCAGCCGACGGGACATATTTGCACCAGTTCCATCCAGTCAAAACACACACATAACGATTTATCCAGACACATTTCAACGTTATTACGTGACCATC	AGTGTCATCTTTAAGTCACAACAACCCATTACTTAACTGATTTCTTACTAAATTTTGTACGTTACTAGGGCTGTGACTGATTACTTTCACTGCAAACTGAAACTACAACCGTCTGTATGAGGAACAAGTTACATTTTTTCACTGCTTAAAACAACGGCAGCCGACGGGACATATTTGCACCAGTTCCATCCAGTCAAAACACACACATAACGATTTATCCAGACACATTTCAACGTTATTACGTGACCATC

## Sheet: mt_haplotypes
COI_hap	COII_hap	COI+COII_hap	COI_seq	COII_seq	COI+COII_seq
1	1	1	ACATCACTTAGAATACTAATTCGAACAGAACTAGGGCAACCCGGATCTCTAATTGGAGATGACCAGATCTACAACGTTATCGTTACTGCTCATGCATTCGTCATAATTTTCTTTATAGTCATACCAATCATGATTGGTGGATTCGGAAACTGATTAGTACCACTTATATTAGGAGCCCCAGACATGGCATTCCCACGAATAAACAACATAAGATTTTGATTACTCCCACCGTCATTAACATTACTACTTACTAGCAGAACAGTAGAAAGTGGAGCAGGGACAGGATGAACAGTCTACCCCCCTCTTGCGAGAGGTATTGCCCATGCAGGAGCATCCGTAGACTTAGCCATCTTCTCCTTACATCTAGCAGGTGTTTCATCAATTTTGGGAGCAGTAAAT…	TTCTTCCACGATCATACATTAATAATTATATTAATAATCATCACAACCGTTATATACATGATAACCACCCTACTTTGAAATAAACATACTAGACGATTCATACTAGAAGGACAACTAATTGAAACTACATGAACAATTGCACCAGCAATTATCTTAGTATTCATTGCAATACCATCCTTACGACTTCTATATCTAATAGACGAAATTCACAACCCAACAATAACCCTAAAAGCAGTGGGACATCAATGATACTGAAGATATGAATATTCAGACTTCACAAAATTAGAATTCGACTCTTACATAATCCCACAAGAGGAAAATCAAGCAAGAACTTTCCGACTACTAGACACAGATAATCGAATTGTACTACCCATAAATTCACCAATCCGACTAGTAGTG…	ACATCACTTAGAATACTAATTCGAACAGAACTAGGGCAACCCGGATCTCTAATTGGAGATGACCAGATCTACAACGTTATCGTTACTGCTCATGCATTCGTCATAATTTTCTTTATAGTCATACCAATCATGATTGGTGGATTCGGAAACTGATTAGTACCACTTATATTAGGAGCCCCAGACATGGCATTCCCACGAATAAACAACATAAGATTTTGATTACTCCCACCGTCATTAACATTACTACTTACTAGCAGAACAGTAGAAAGTGGAGCAGGGACAGGATGAACAGTCTACCCCCCTCTTGCGAGAGGTATTGCCCATGCAGGAGCATCCGTAGACTTAGCCATCTTCTCCTTACATCTAGCAGGTGTTTCATCAATTTTGGGAGCAGTAAAT…
2	2	2	ACATCACTTAGAATACTAATTCGAACAGAACTAGGGCAACCCGGATCTCTAATTGGAGATGACCAGATCTACAACGTTATCGTTACTGCTCATGCATTCGTCATAATTTTCTTTATGGTCATACCAATCATGATTGGTGGATTCGGAAACTGATTAGTACCACTTATATTAGGAGCCCCAGACATGGCATTCCCACGAATAAACAACATAAGATTTTGATTACTCCCACCGTCATTAACATTACTACTTACTAGCAGAACAGTAGAAAGTGGAGCAGGGACAGGATGAACAGTCTACCCCCCTCTTGCGAGAGGTATTGCCCATGCAGGAGCATCCGTAGACTTAGCCATCTTCTCCTTACATCTAGCAGGTGTTTCATCAATTTTGGGAGCAGTAAAT…	TTCTTCCACGATCATACATTAATAATTATATTAATAATCATCACAACCGTTATATACATGATAACCACCCTACTTTGAAATAAACATACTAGACGATTCATGCTAGAAGGACAACTAATTGAAACTACATGAACAATTGCACCAGCAATTATCTTAGTATTCATTGCAATACCATCCTTACGACTTCTATATCTAATAGACGAAATCCACAACCCAACAATAACCCTAAAAGCAGTGGGACATCAATGATACTGAAGATATGAATATTCAGACTTCACAAAATTAGAATTCGACTCTTACATAATCCCACAAGAGGAAAATCAAGCAAGAACTTTCCGACTACTAGACACAGATAATCGAATTGTACTACCCATAAATTCACCAATCCGACTAGTAGTG…	ACATCACTTAGAATACTAATTCGAACAGAACTAGGGCAACCCGGATCTCTAATTGGAGATGACCAGATCTACAACGTTATCGTTACTGCTCATGCATTCGTCATAATTTTCTTTATGGTCATACCAATCATGATTGGTGGATTCGGAAACTGATTAGTACCACTTATATTAGGAGCCCCAGACATGGCATTCCCACGAATAAACAACATAAGATTTTGATTACTCCCACCGTCATTAACATTACTACTTACTAGCAGAACAGTAGAAAGTGGAGCAGGGACAGGATGAACAGTCTACCCCCCTCTTGCGAGAGGTATTGCCCATGCAGGAGCATCCGTAGACTTAGCCATCTTCTCCTTACATCTAGCAGGTGTTTCATCAATTTTGGGAGCAGTAAAT…
3	3	3	ACATCACTTAGAATACTAATTCGAACAGAACTAGGGCAACCCGGATCTCTAATTGGAGATGACCAGATCTATAACGTCATCGTTACTGCTCATGCATTCGTCATAATTTTCTTTATGGTCATACCAATCATGATTGGTGGATTCGGAAACTGACTAGTACCACTTATATTAGGGGCCCCAGACATAGCATTCCCACGAATAAACAACATAAGATTTTGATTACTACCACCATCATTAACTCTACTACTTACTAGCAGAACAGTAGAAAGTGGAGCAGGGACAGGATGAACAGTTTACCCCCCTCTTGCGAGAGGTATTGCCCACGCAGGAGCATCCGTAGACTTAGCCATCTTCTCCTTACATCTAGCAGGTGTTTCATCAATTTTGGGAGCAGTAAAT…	TTCTTCCACGATCATACATTAATAATCATATTAATAATCATCACAACCGTTATATACATAATAACCACCCTACTTTGAAATAAACACACCAGACGATTCATACTAGAAGGACAACTAATTGAAACTACATGAACAATTGCACCAGCAATCATCCTAGTATTCATTGCAATACCATCCTTACGACTTCTATATCTAATAGACGAAATCCACAACCCAACAATAACCCTAAAGGCAGTAGGACATCAGTGATACTGAAGATATGAATACTCAGACTTCACAAAATTAGAATTCGACTCTTACATAATCCCACAAGAGGAAAATCAAGCAAGAACTTTCCGACTACTAGACACAGATAATCGAATTGTACTACCCATAAATTCACCAATCCGACTGGTAGTG…	ACATCACTTAGAATACTAATTCGAACAGAACTAGGGCAACCCGGATCTCTAATTGGAGATGACCAGATCTATAACGTCATCGTTACTGCTCATGCATTCGTCATAATTTTCTTTATGGTCATACCAATCATGATTGGTGGATTCGGAAACTGACTAGTACCACTTATATTAGGGGCCCCAGACATAGCATTCCCACGAATAAACAACATAAGATTTTGATTACTACCACCATCATTAACTCTACTACTTACTAGCAGAACAGTAGAAAGTGGAGCAGGGACAGGATGAACAGTTTACCCCCCTCTTGCGAGAGGTATTGCCCACGCAGGAGCATCCGTAGACTTAGCCATCTTCTCCTTACATCTAGCAGGTGTTTCATCAATTTTGGGAGCAGTAAAT…
4	4	4	ACATCACTTAGAATACTAATTCGAACAGAACTAGGACAACCCGGATCTCTAATTGGAGATGACCAGATCTACAACGTTATCGTTACTGCTCATGCATTCGTCATAATTTTCTTTATGGTCATACCAATCATGATTGGTGGATTTGGAAACTGACTAGTACCACTTATATTAGGAGCCCCAGACATGGCATTCCCACGAATAAACAACATAAGATTTTGATTACTCCCACCATCATTAACATTACTACTTACTAGCAGAACAGTAGAAAGTGGAGCAGGGACAGGATGAACAGTTTACCCCCCTCTTGCGAGAGGTATTGCCCACGCAGGGGCATCCGTAGACTTAGCCATCTTCTCCTTACATCTAGCAGGTGTTTCATCAATTTTGGGAGCAGTAAAT…	TTCTTCCACGATCATACATTAATAATTATATTAATAATCATCACAACCGTTATATACATAATAACCACCCTACTTTGAAATAAACACACTAGACGATTCATACTAGAAGGACAATTAATTGAAACTACATGAACAATTGCACCAGCAATCATCCTAGTATTCATTGCAATACCATCCTTACGACTTCTATATCTAATAGACGAAATTCACAACCCAACAATAACCCTAAAAGCAGTAGGACATCAATGATACTGAAGATATGAGTACTCAGACTTCACAAAATTAGAATTCGACTCTTACATAATCCCGCAAGAGGAAAATCAAGAAAGAACTTTCCGACTACTAGACACAGATAATCGAATTGTACTACCCATAAATTCACCAATCCGACTGGTAGTG…	ACATCACTTAGAATACTAATTCGAACAGAACTAGGACAACCCGGATCTCTAATTGGAGATGACCAGATCTACAACGTTATCGTTACTGCTCATGCATTCGTCATAATTTTCTTTATGGTCATACCAATCATGATTGGTGGATTTGGAAACTGACTAGTACCACTTATATTAGGAGCCCCAGACATGGCATTCCCACGAATAAACAACATAAGATTTTGATTACTCCCACCATCATTAACATTACTACTTACTAGCAGAACAGTAGAAAGTGGAGCAGGGACAGGATGAACAGTTTACCCCCCTCTTGCGAGAGGTATTGCCCACGCAGGGGCATCCGTAGACTTAGCCATCTTCTCCTTACATCTAGCAGGTGTTTCATCAATTTTGGGAGCAGTAAAT…
5	5	5	ACATCACTTAGAATACTAATTCGAACAGAACTAGGGCAACCCGGATCTCTAATTGGAGATGACCAGATCTACAACGTTATCGTTACTGCTCATGCATTCGTCATAATTTTCTTTATAGTCATACCAATCATGATTGGTGGATTCGGAAACTGATTAGTACCACTTATATTAGGAGCCCCAGACATGGCATTCCCACGAATAAACAACATAAGATTTTGATTACTCCCACCGTCATTAACATTACTACTTACTAGCAGAACAGTAGAAAGTGGAGCAGGGACAGGATGAACAGTCTACCCCCCTCTTGCGAGAGGTATTGCCCATGCAGGAGCATCCGTAGACTTAGCCATCTTCTCCTTGCATCTAGCAGGTGTTTCATCAATTTTGGGAGCAGTAAAT…	TTCTTCCACGATCATACATTAATAATTATATTAATAATCATCACAACCGTTATATACATGATAACCACCCTACTTTGAAATAAACATACTAGACGATTCATACTAGAAGGACAACTAATTGAAACTACATGAACAATTGCACCAGCAATTATCTTAGTATTCATTGCAATACCATCCTTACGACTTCTATATCTAATAGACGAAATCCACAACCCAACAATAACCCTAAAAGCAGTGGGACATCAATGATACTGAAGATATGAATATTCAGACTTCACAAAATTAGAATTCGACTCTTACATAATCCCACAAGAGGAAAATCAAGCAAGAACTTTCCGACTACTAGACACAGATAATCGAATTGTACTACCCATAAATTCACCAATCCGACTAGTAGTG…	ACATCACTTAGAATACTAATTCGAACAGAACTAGGGCAACCCGGATCTCTAATTGGAGATGACCAGATCTACAACGTTATCGTTACTGCTCATGCATTCGTCATAATTTTCTTTATAGTCATACCAATCATGATTGGTGGATTCGGAAACTGATTAGTACCACTTATATTAGGAGCCCCAGACATGGCATTCCCACGAATAAACAACATAAGATTTTGATTACTCCCACCGTCATTAACATTACTACTTACTAGCAGAACAGTAGAAAGTGGAGCAGGGACAGGATGAACAGTCTACCCCCCTCTTGCGAGAGGTATTGCCCATGCAGGAGCATCCGTAGACTTAGCCATCTTCTCCTTGCATCTAGCAGGTGTTTCATCAATTTTGGGAGCAGTAAAT…
1	5	6	ACATCACTTAGAATACTAATTCGAACAGAACTAGGGCAACCCGGATCTCTAATTGGAGATGACCAGATCTACAACGTTATCGTTACTGCTCATGCATTCGTCATAATTTTCTTTATAGTCATACCAATCATGATTGGTGGATTCGGAAACTGATTAGTACCACTTATATTAGGAGCCCCAGACATGGCATTCCCACGAATAAACAACATAAGATTTTGATTACTCCCACCGTCATTAACATTACTACTTACTAGCAGAACAGTAGAAAGTGGAGCAGGGACAGGATGAACAGTCTACCCCCCTCTTGCGAGAGGTATTGCCCATGCAGGAGCATCCGTAGACTTAGCCATCTTCTCCTTACATCTAGCAGGTGTTTCATCAATTTTGGGAGCAGTAAAT…	TTCTTCCACGATCATACATTAATAATTATATTAATAATCATCACAACCGTTATATACATGATAACCACCCTACTTTGAAATAAACATACTAGACGATTCATACTAGAAGGACAACTAATTGAAACTACATGAACAATTGCACCAGCAATTATCTTAGTATTCATTGCAATACCATCCTTACGACTTCTATATCTAATAGACGAAATCCACAACCCAACAATAACCCTAAAAGCAGTGGGACATCAATGATACTGAAGATATGAATATTCAGACTTCACAAAATTAGAATTCGACTCTTACATAATCCCACAAGAGGAAAATCAAGCAAGAACTTTCCGACTACTAGACACAGATAATCGAATTGTACTACCCATAAATTCACCAATCCGACTAGTAGTG…	ACATCACTTAGAATACTAATTCGAACAGAACTAGGGCAACCCGGATCTCTAATTGGAGATGACCAGATCTACAACGTTATCGTTACTGCTCATGCATTCGTCATAATTTTCTTTATAGTCATACCAATCATGATTGGTGGATTCGGAAACTGATTAGTACCACTTATATTAGGAGCCCCAGACATGGCATTCCCACGAATAAACAACATAAGATTTTGATTACTCCCACCGTCATTAACATTACTACTTACTAGCAGAACAGTAGAAAGTGGAGCAGGGACAGGATGAACAGTCTACCCCCCTCTTGCGAGAGGTATTGCCCATGCAGGAGCATCCGTAGACTTAGCCATCTTCTCCTTACATCTAGCAGGTGTTTCATCAATTTTGGGAGCAGTAAAT…
6	6	7	ACATCACTTAGAATACTAATTCGAACAGAACTAGGGCAACCCGGATCTCTAATTGGAGATGACCAGATCTACAACGTTATCGTTACTGCTCATGCATTCGTCATAATTTTCTTTATAGTAATACCAATCATGATTGGTGGATTCGGAAACTGATTAGTACCACTTATATTAGGAGCCCCAGACATGGCATTCCCACGAATAAACAACATAAGATTTTGATTACTCCCACCGTCATTAACATTACTACTTACTAGCAGAACAGTAGAAAGTGGAGCAGGGACAGGATGAACAGTCTACCCCCCTCTTGCGAGAGGTATTGCCCATGCAGGAGCATCCGTAGACTTAGCCATCTTCTCCTTACATCTAGCAGGTGTTTCATCAATTTTGGGAGCAGTAAAT…	TTCTTCCACGATCATACATTAATAATTATATTAATAATCATCACAACCGTTATATACATGATAACCACCCTACTTTGAAATAAACATACTAGACGATTCATACTAGAAGGACAACTAATTGAAACTACATGAACAATTGCACCAGCAATTATCTTAGTATTCATTGCAATACCATCCTTACGACTTCTATATCTAATAGACGAAATCCACAACCCAACAATAACCCTAAAAGCAGTGGGACATCAATGATACTGAAGATATGAATATTCAGACTTCACAAAATTAGAATTTGACTCTTACATAATCCCACAAGAGGAAAATCAAGCAAGAACTTTCCGACTACTAGACACAGATAATCGAATTGTACTACCCATAAATTCACCAATCCGACTAGTAGTG…	ACATCACTTAGAATACTAATTCGAACAGAACTAGGGCAACCCGGATCTCTAATTGGAGATGACCAGATCTACAACGTTATCGTTACTGCTCATGCATTCGTCATAATTTTCTTTATAGTAATACCAATCATGATTGGTGGATTCGGAAACTGATTAGTACCACTTATATTAGGAGCCCCAGACATGGCATTCCCACGAATAAACAACATAAGATTTTGATTACTCCCACCGTCATTAACATTACTACTTACTAGCAGAACAGTAGAAAGTGGAGCAGGGACAGGATGAACAGTCTACCCCCCTCTTGCGAGAGGTATTGCCCATGCAGGAGCATCCGTAGACTTAGCCATCTTCTCCTTACATCTAGCAGGTGTTTCATCAATTTTGGGAGCAGTAAAT…
7	5	8	ACATCACTTAGAATACTAATTCGAACAGAACTAGGGCAACCCGGATCTCTAATTGGAGATGACCAGATCTACAACGTTATCGTTACTGCTCATGCATTCGTCATAATTTTCTTTATAGTCATACCAATCATGATTGGTGGATTCGGAAACTGATTAGTACCACTTATATTAGGAGCCCCAGACATGGCATTCCCACGAATAAACAACATAAGATTTTGATTACTCCCACCGTCATTAACATTACTACTTACTAGCAGAACAGTAGAAAGTGGAGCAGGGACAGGATGAACAGTCTACCCCCCTCTTGCGAGAGGTATTGCCCATGCAGGAGCATCCGTAGACTTAGCCATCTTCTCCTTACATCTAGCAGGCGTTTCATCAATTTTGGGAGCAGTAAAT…	TTCTTCCACGATCATACATTAATAATTATATTAATAATCATCACAACCGTTATATACATGATAACCACCCTACTTTGAAATAAACATACTAGACGATTCATACTAGAAGGACAACTAATTGAAACTACATGAACAATTGCACCAGCAATTATCTTAGTATTCATTGCAATACCATCCTTACGACTTCTATATCTAATAGACGAAATCCACAACCCAACAATAACCCTAAAAGCAGTGGGACATCAATGATACTGAAGATATGAATATTCAGACTTCACAAAATTAGAATTCGACTCTTACATAATCCCACAAGAGGAAAATCAAGCAAGAACTTTCCGACTACTAGACACAGATAATCGAATTGTACTACCCATAAATTCACCAATCCGACTAGTAGTG…	ACATCACTTAGAATACTAATTCGAACAGAACTAGGGCAACCCGGATCTCTAATTGGAGATGACCAGATCTACAACGTTATCGTTACTGCTCATGCATTCGTCATAATTTTCTTTATAGTCATACCAATCATGATTGGTGGATTCGGAAACTGATTAGTACCACTTATATTAGGAGCCCCAGACATGGCATTCCCACGAATAAACAACATAAGATTTTGATTACTCCCACCGTCATTAACATTACTACTTACTAGCAGAACAGTAGAAAGTGGAGCAGGGACAGGATGAACAGTCTACCCCCCTCTTGCGAGAGGTATTGCCCATGCAGGAGCATCCGTAGACTTAGCCATCTTCTCCTTACATCTAGCAGGCGTTTCATCAATTTTGGGAGCAGTAAAT…
8	6	9	ACATCACTTAGAATACTAATTCGAACAGAACTAGGGCAACCCGGATCTCTAATTGGAGATGACCAGATCTACAACGTTATCGTTACTGCTCATGCATTCGTCATAATTTTCTTTATAGTCATACCAATCATGATTGGTGGATTCGGAAACTGATTAGTACCACTTATATTAGGAGCCCCAGACATGGCATTCCCACGAATAAACAACATAAGATTTTGATTACTCCCACCGTCATTAACATTACTACTTACTAGCAGAACAGTAGAAAGTGGAGCAGGGACAGGATGAACAGTCTACCCCCCTCTTGCGAGAGGTATTGCCCATGCAGGAGCATCCGTAGACTTAGCCATCTTCTCCTTACATCTAGCAGGTGTTTCATCAATTTTGGGAGCAGTAAAT…	TTCTTCCACGATCATACATTAATAATTATATTAATAATCATCACAACCGTTATATACATGATAACCACCCTACTTTGAAATAAACATACTAGACGATTCATACTAGAAGGACAACTAATTGAAACTACATGAACAATTGCACCAGCAATTATCTTAGTATTCATTGCAATACCATCCTTACGACTTCTATATCTAATAGACGAAATCCACAACCCAACAATAACCCTAAAAGCAGTGGGACATCAATGATACTGAAGATATGAATATTCAGACTTCACAAAATTAGAATTTGACTCTTACATAATCCCACAAGAGGAAAATCAAGCAAGAACTTTCCGACTACTAGACACAGATAATCGAATTGTACTACCCATAAATTCACCAATCCGACTAGTAGTG…	ACATCACTTAGAATACTAATTCGAACAGAACTAGGGCAACCCGGATCTCTAATTGGAGATGACCAGATCTACAACGTTATCGTTACTGCTCATGCATTCGTCATAATTTTCTTTATAGTCATACCAATCATGATTGGTGGATTCGGAAACTGATTAGTACCACTTATATTAGGAGCCCCAGACATGGCATTCCCACGAATAAACAACATAAGATTTTGATTACTCCCACCGTCATTAACATTACTACTTACTAGCAGAACAGTAGAAAGTGGAGCAGGGACAGGATGAACAGTCTACCCCCCTCTTGCGAGAGGTATTGCCCATGCAGGAGCATCCGTAGACTTAGCCATCTTCTCCTTACATCTAGCAGGTGTTTCATCAATTTTGGGAGCAGTAAAT…
9	1	10	ACATCACTTAGAATACTAATTCGAACAGAACTAGGACAACCCGGATCTCTAATTGGAGATGACCAGATCTACAACGTTATCGTTACTGCTCATGCATTCGTCATAATTTTCTTTATAGTCATACCAATCATGATTGGTGGATTCGGAAACTGATTAGTACCACTTATATTAGGAGCCCCAGACATGGCATTCCCACGAATAAACAACATAAGATTTTGATTACTCCCACCGTCATTAACATTACTACTTACTAGCAGAACAGTAGAAAGTGGAGCAGGGACAGGATGAACAGTCTACCCCCCTCTTGCGAGAGGTATTGCCCATGCAGGAGCATCCGTAGACTTAGCCATCTTCTCCTTACATCTAGCAGGTGTTTCATCAATTTTGGGAGCAGTAAAT…	TTCTTCCACGATCATACATTAATAATTATATTAATAATCATCACAACCGTTATATACATGATAACCACCCTACTTTGAAATAAACATACTAGACGATTCATACTAGAAGGACAACTAATTGAAACTACATGAACAATTGCACCAGCAATTATCTTAGTATTCATTGCAATACCATCCTTACGACTTCTATATCTAATAGACGAAATTCACAACCCAACAATAACCCTAAAAGCAGTGGGACATCAATGATACTGAAGATATGAATATTCAGACTTCACAAAATTAGAATTCGACTCTTACATAATCCCACAAGAGGAAAATCAAGCAAGAACTTTCCGACTACTAGACACAGATAATCGAATTGTACTACCCATAAATTCACCAATCCGACTAGTAGTG…	ACATCACTTAGAATACTAATTCGAACAGAACTAGGACAACCCGGATCTCTAATTGGAGATGACCAGATCTACAACGTTATCGTTACTGCTCATGCATTCGTCATAATTTTCTTTATAGTCATACCAATCATGATTGGTGGATTCGGAAACTGATTAGTACCACTTATATTAGGAGCCCCAGACATGGCATTCCCACGAATAAACAACATAAGATTTTGATTACTCCCACCGTCATTAACATTACTACTTACTAGCAGAACAGTAGAAAGTGGAGCAGGGACAGGATGAACAGTCTACCCCCCTCTTGCGAGAGGTATTGCCCATGCAGGAGCATCCGTAGACTTAGCCATCTTCTCCTTACATCTAGCAGGTGTTTCATCAATTTTGGGAGCAGTAAAT…
10	1	11	ACATCACTTAGAATATTAATTCGAACAGAACTAGGGCAACCCGGATCTCTAATTGGAGATGACCAGATCTACAACGTTATCGTTACTGCTCATGCATTCGTCATAATTTTCTTTATAGTCATACCAATCATGATTGGTGGATTCGGAAACTGGCTAGTACCACTTATATTAGGAGCCCCAGACATGGCATTCCCACGAATAAACAACATAAGATTTTGATTACTCCCACCGTCATTAACATTACTACTTACTAGCAGAACAGTAGAAAGTGGAGCAGGGACAGGATGAACAGTTTACCCCCCTCTTGCGAGAGGTATTGCCCATGCAGGAGCATCCGTAGACTTAGCCATCTTCTCTTTACATCTAGCAGGTGTTTCATCAATTTTGGGAGCAGTAAAT…	TTCTTCCACGATCATACATTAATAATTATATTAATAATCATCACAACCGTTATATACATGATAACCACCCTACTTTGAAATAAACATACTAGACGATTCATACTAGAAGGACAACTAATTGAAACTACATGAACAATTGCACCAGCAATTATCTTAGTATTCATTGCAATACCATCCTTACGACTTCTATATCTAATAGACGAAATTCACAACCCAACAATAACCCTAAAAGCAGTGGGACATCAATGATACTGAAGATATGAATATTCAGACTTCACAAAATTAGAATTCGACTCTTACATAATCCCACAAGAGGAAAATCAAGCAAGAACTTTCCGACTACTAGACACAGATAATCGAATTGTACTACCCATAAATTCACCAATCCGACTAGTAGTG…	ACATCACTTAGAATATTAATTCGAACAGAACTAGGGCAACCCGGATCTCTAATTGGAGATGACCAGATCTACAACGTTATCGTTACTGCTCATGCATTCGTCATAATTTTCTTTATAGTCATACCAATCATGATTGGTGGATTCGGAAACTGGCTAGTACCACTTATATTAGGAGCCCCAGACATGGCATTCCCACGAATAAACAACATAAGATTTTGATTACTCCCACCGTCATTAACATTACTACTTACTAGCAGAACAGTAGAAAGTGGAGCAGGGACAGGATGAACAGTTTACCCCCCTCTTGCGAGAGGTATTGCCCATGCAGGAGCATCCGTAGACTTAGCCATCTTCTCTTTACATCTAGCAGGTGTTTCATCAATTTTGGGAGCAGTAAAT…
11	7	12	ACATCACTTAGTATACTAATTCGAACAGAACTAGGGCAACCCGGATCCCTAATTGGAGATGACCAGATCTACAACGTTATCGTTACTGCTCATGCATTCGTCATAATTTTCTTTATGGTCATACCAATCATGATTGGTGGATTTGGAAACTGACTAGTACCACTTATATTAGGAGCCCCAGACATGGCATTCCCACGAATAAACAACATAAGATTTTGATTACTCCCACCATCATTAACATTACTACTTACTAGCAGAACAGTAGAAAGTGGAGCAGGGACAGGATGAACAGTTTACCCCCCTCTTGCGAGAGGTATTGCCCATGCAGGAGCATCCGTAGACTTAGCCATCTTCTCCTTACATCTAGCAGGTGTTTCATCAATTTTGGGAGCAGTAAAT…	TTCTTCCACGATCATACATTAATAATTATATTAATAATCATCACAACCGTTATATACATAATAACCACCCTACTTTGAAATAAACATACTAGACGATTCATACTAGAAGGACAACTAATTGAAACTACATGAACAATTGCACCAGCAATTATCTTAGTATTCATTGCAATACCATCCTTACGACTCCTATATCTAATAGACGAAATCCACAACCCAACAATAACCCTAAAAGCAGTAGGACATCAATGATACTGAAGATATGAATATTCAGACTTCACAAAATTAGAATTCGACTCTTACATAATCCCACAAGAGGAAAATCAAGCAAGAACTTTCCGACTACTAGACACAGATAATCGAATTGTACTACCCATAAATTCACCAATCCGACTAGTAGTG…	ACATCACTTAGTATACTAATTCGAACAGAACTAGGGCAACCCGGATCCCTAATTGGAGATGACCAGATCTACAACGTTATCGTTACTGCTCATGCATTCGTCATAATTTTCTTTATGGTCATACCAATCATGATTGGTGGATTTGGAAACTGACTAGTACCACTTATATTAGGAGCCCCAGACATGGCATTCCCACGAATAAACAACATAAGATTTTGATTACTCCCACCATCATTAACATTACTACTTACTAGCAGAACAGTAGAAAGTGGAGCAGGGACAGGATGAACAGTTTACCCCCCTCTTGCGAGAGGTATTGCCCATGCAGGAGCATCCGTAGACTTAGCCATCTTCTCCTTACATCTAGCAGGTGTTTCATCAATTTTGGGAGCAGTAAAT…
12	8	13	ACATCACTTAGAATACTAATTCGAACAGAACTAGGGCAACCCGGATCTCTAATTGGAGATGACCAGATCTACAACGTTATCGTTACTGCTCATGCATTCGTCATAATTTTCTTTATAGTCATACCAATCATGATTGGTGGATTCGGAAACTGGCTAGTACCACTTATATTAGGAGCCCCAGACATGGCATTCCCACGAATAAACAACATAAGATTTTGATTACTCCCACCGTCATTAACATTACTACTTACTAGCAGAACAGTAGAAAGTGGAGCAGGGACAGGATGAACAGTTTACCCCCCTCTTGCGAGAGGTATTGCCCATGCAGGAGCATCCGTAGACTTAGCCATCTTCTCTTTACATCTAGCAGGTGTTTCATCAATTTTGGGAGCAGTAAAT…	TTCTTCCACGATCATACATTAATAATTATATTAATAATCATCACAACCGTTATATACATGATAACCACCCTACTTTGAAATAAACATACTAGACGATTCATACTAGAAGGACAACTAATTGAAACTACATGAACAATTGCACCAGCAATTATCTTAGTATTCATTGCAATACCATCCTTACGACTTCTATATCTAATAGACGAAATCCACAACCCAACAATAACCCTAAAAGCAGTAGGACATCAATGATACTGAAGATATGAATATTCAGACTTCACAAAATTAGAATTCGACTCTTACATAATCCCACAAGAGGAAAATCAAGCAAGAACTTTCCGACTACTAGACACAGATAATCGAATTGTACTACCCATAAATTCACCAATCCGACTAGTAGTG…	ACATCACTTAGAATACTAATTCGAACAGAACTAGGGCAACCCGGATCTCTAATTGGAGATGACCAGATCTACAACGTTATCGTTACTGCTCATGCATTCGTCATAATTTTCTTTATAGTCATACCAATCATGATTGGTGGATTCGGAAACTGGCTAGTACCACTTATATTAGGAGCCCCAGACATGGCATTCCCACGAATAAACAACATAAGATTTTGATTACTCCCACCGTCATTAACATTACTACTTACTAGCAGAACAGTAGAAAGTGGAGCAGGGACAGGATGAACAGTTTACCCCCCTCTTGCGAGAGGTATTGCCCATGCAGGAGCATCCGTAGACTTAGCCATCTTCTCTTTACATCTAGCAGGTGTTTCATCAATTTTGGGAGCAGTAAAT…
13	9	14	ACATCACTTAGAATGCTAATTCGAACAGAACTAGGGCAACCCGGATCTCTAATTGGAGATGACCAGATCTACAACGTTATCGTTACTGCTCATGCATTCGTCATAATTTTCTTTATGGTCATACCAATCATGATTGGTGGATTTGGAAACTGACTAGTACCACTTATATTAGGAGCCCCAGACATGGCATTCCCACGAATAAACAACATAAGATTTTGATTACTCCCACCATCATTAACATTACTACTTACTAGCAGAACAGTAGAAAGTGGAGCAGGGACAGGATGAACAGTTTACCCCCCTCTTGCGAGAGGTATTGCCCATGCAGGAGCATCCGTAGACTTAGCCATCTTCTCCTTACATCTAGCAGGTGTTTCATCAATTTTGGGAGCAGTAAAT…	TTCTTCCACGATCATACACTAATAATTATATTAATAATCATCACAACCGTTATATACATAATAACCACCCTACTTTGAAATAAACATACCAGACGATTCATACTAGAAGGACAAATAATTGAAACTACATGAACAATTGCACCAGCAATTATCTTAGTATTCATTGCAATACCATCCTTACGACTTCTATACCTAATAGACGAAATCCACAACCCAACAATAACCCTAAAAGCTGTAGGACATCAATGATACTGAAGATATGAATACTCAGACTTCACAAAATTAGAATTCGACTCTTACATAATCCCACAAGAGGAAAATCAAGCAAGAACTTTCCGACTACTAGACACAGATAATCGAATTGTACTACCCATAAATTCACCAATCCGACTAGTAGTG…	ACATCACTTAGAATGCTAATTCGAACAGAACTAGGGCAACCCGGATCTCTAATTGGAGATGACCAGATCTACAACGTTATCGTTACTGCTCATGCATTCGTCATAATTTTCTTTATGGTCATACCAATCATGATTGGTGGATTTGGAAACTGACTAGTACCACTTATATTAGGAGCCCCAGACATGGCATTCCCACGAATAAACAACATAAGATTTTGATTACTCCCACCATCATTAACATTACTACTTACTAGCAGAACAGTAGAAAGTGGAGCAGGGACAGGATGAACAGTTTACCCCCCTCTTGCGAGAGGTATTGCCCATGCAGGAGCATCCGTAGACTTAGCCATCTTCTCCTTACATCTAGCAGGTGTTTCATCAATTTTGGGAGCAGTAAAT…
10	8	15	ACATCACTTAGAATATTAATTCGAACAGAACTAGGGCAACCCGGATCTCTAATTGGAGATGACCAGATCTACAACGTTATCGTTACTGCTCATGCATTCGTCATAATTTTCTTTATAGTCATACCAATCATGATTGGTGGATTCGGAAACTGGCTAGTACCACTTATATTAGGAGCCCCAGACATGGCATTCCCACGAATAAACAACATAAGATTTTGATTACTCCCACCGTCATTAACATTACTACTTACTAGCAGAACAGTAGAAAGTGGAGCAGGGACAGGATGAACAGTTTACCCCCCTCTTGCGAGAGGTATTGCCCATGCAGGAGCATCCGTAGACTTAGCCATCTTCTCTTTACATCTAGCAGGTGTTTCATCAATTTTGGGAGCAGTAAAT…	TTCTTCCACGATCATACATTAATAATTATATTAATAATCATCACAACCGTTATATACATGATAACCACCCTACTTTGAAATAAACATACTAGACGATTCATACTAGAAGGACAACTAATTGAAACTACATGAACAATTGCACCAGCAATTATCTTAGTATTCATTGCAATACCATCCTTACGACTTCTATATCTAATAGACGAAATCCACAACCCAACAATAACCCTAAAAGCAGTAGGACATCAATGATACTGAAGATATGAATATTCAGACTTCACAAAATTAGAATTCGACTCTTACATAATCCCACAAGAGGAAAATCAAGCAAGAACTTTCCGACTACTAGACACAGATAATCGAATTGTACTACCCATAAATTCACCAATCCGACTAGTAGTG…	ACATCACTTAGAATATTAATTCGAACAGAACTAGGGCAACCCGGATCTCTAATTGGAGATGACCAGATCTACAACGTTATCGTTACTGCTCATGCATTCGTCATAATTTTCTTTATAGTCATACCAATCATGATTGGTGGATTCGGAAACTGGCTAGTACCACTTATATTAGGAGCCCCAGACATGGCATTCCCACGAATAAACAACATAAGATTTTGATTACTCCCACCGTCATTAACATTACTACTTACTAGCAGAACAGTAGAAAGTGGAGCAGGGACAGGATGAACAGTTTACCCCCCTCTTGCGAGAGGTATTGCCCATGCAGGAGCATCCGTAGACTTAGCCATCTTCTCTTTACATCTAGCAGGTGTTTCATCAATTTTGGGAGCAGTAAAT…
14	10	16	ACATCACTTAGAATACTAATTCGAACAGAACTAGGACAACCCGGATCTCTAATTGGAGATGACCAGATCTACAACGTTATCGTTACTGCTCATGCATTCGTCATAATTTTCTTTATAGTCATACCAATCATGATTGGTGGATTCGGAAACTGGCTAGTACCACTTATATTAGGAGCCCCAGACATGGCATTCCCACGAATAAACAACATAAGATTTTGATTACTCCCACCGTCATTAACATTACTACTTACTAGCAGAACAGTAGAAAGTGGAGCAGGGACAGGATGAACAGTTTACCCCCCTCTTGCGAGAGGTATTGCCCATGCAGGAGCATCCGTAGACTTAGCCATCTTCTCTTTACATCTAGCAGGTGTTTCATCAATTTTGGGAGCAGTAAAT…	TTCTTCCACGATCATACATTAATAATTATATTAATAATCATCACAACCGTTATATACATGATAACCACCCTACTTTGAAATAAACATATTAGACGATTCATACTAGAAGGACAACTAATTGAAACTACATGAACAATTGCACCAGCAATTATCTTAGTATTCATTGCAATACCATCCTTACGACTTCTATATCTAATAGACGAAATCCACAACCCAACAATAACCCTAAAAGCAGTAGGACATCAATGATACTGAAGATATGAATATTCAGACTTCACAAAATTAGAATTCGACTCTTACATAATCCCACAAGAGGAAAATCAAGCAAGAACTTTCCGACTACTAGACACAGATAATCGAATTGTACTACCCATAAATTCACCAATCCGACTAGTAGTG…	ACATCACTTAGAATACTAATTCGAACAGAACTAGGACAACCCGGATCTCTAATTGGAGATGACCAGATCTACAACGTTATCGTTACTGCTCATGCATTCGTCATAATTTTCTTTATAGTCATACCAATCATGATTGGTGGATTCGGAAACTGGCTAGTACCACTTATATTAGGAGCCCCAGACATGGCATTCCCACGAATAAACAACATAAGATTTTGATTACTCCCACCGTCATTAACATTACTACTTACTAGCAGAACAGTAGAAAGTGGAGCAGGGACAGGATGAACAGTTTACCCCCCTCTTGCGAGAGGTATTGCCCATGCAGGAGCATCCGTAGACTTAGCCATCTTCTCTTTACATCTAGCAGGTGTTTCATCAATTTTGGGAGCAGTAAAT…
15	6	17	ACATCACTTAGAATACTAATTCGAACAGAACTAGGGCAACCCGGATCTCTAATTGGAGATGACCAGATCTACAACGTTATCGTTACTGCTCATGCATTCGTCATAATTTTCTTTATAGTTATACCAATCATGATTGGTGGATTCGGAAACTGATTAGTACCACTTATATTAGGAGCCCCAGACATGGCATTCCCACGAATAAACAACATAAGATTTTGATTACTCCCACCGTCATTAACATTACTACTTACTAGCAGAACAGTAGAAAGTGGAGCAGGGACAGGATGAACAGTCTACCCCCCTCTTGCGAGAGGTATTGCCCATGCAGGAGCATCCGTAGACTTAGCCATCTTCTCCTTACATCTAGCAGGTGTTTCATCAATTTTGGGAGCAGTAAAT…	TTCTTCCACGATCATACATTAATAATTATATTAATAATCATCACAACCGTTATATACATGATAACCACCCTACTTTGAAATAAACATACTAGACGATTCATACTAGAAGGACAACTAATTGAAACTACATGAACAATTGCACCAGCAATTATCTTAGTATTCATTGCAATACCATCCTTACGACTTCTATATCTAATAGACGAAATCCACAACCCAACAATAACCCTAAAAGCAGTGGGACATCAATGATACTGAAGATATGAATATTCAGACTTCACAAAATTAGAATTTGACTCTTACATAATCCCACAAGAGGAAAATCAAGCAAGAACTTTCCGACTACTAGACACAGATAATCGAATTGTACTACCCATAAATTCACCAATCCGACTAGTAGTG…	ACATCACTTAGAATACTAATTCGAACAGAACTAGGGCAACCCGGATCTCTAATTGGAGATGACCAGATCTACAACGTTATCGTTACTGCTCATGCATTCGTCATAATTTTCTTTATAGTTATACCAATCATGATTGGTGGATTCGGAAACTGATTAGTACCACTTATATTAGGAGCCCCAGACATGGCATTCCCACGAATAAACAACATAAGATTTTGATTACTCCCACCGTCATTAACATTACTACTTACTAGCAGAACAGTAGAAAGTGGAGCAGGGACAGGATGAACAGTCTACCCCCCTCTTGCGAGAGGTATTGCCCATGCAGGAGCATCCGTAGACTTAGCCATCTTCTCCTTACATCTAGCAGGTGTTTCATCAATTTTGGGAGCAGTAAAT…
6	11	18	ACATCACTTAGAATACTAATTCGAACAGAACTAGGGCAACCCGGATCTCTAATTGGAGATGACCAGATCTACAACGTTATCGTTACTGCTCATGCATTCGTCATAATTTTCTTTATAGTAATACCAATCATGATTGGTGGATTCGGAAACTGATTAGTACCACTTATATTAGGAGCCCCAGACATGGCATTCCCACGAATAAACAACATAAGATTTTGATTACTCCCACCGTCATTAACATTACTACTTACTAGCAGAACAGTAGAAAGTGGAGCAGGGACAGGATGAACAGTCTACCCCCCTCTTGCGAGAGGTATTGCCCATGCAGGAGCATCCGTAGACTTAGCCATCTTCTCCTTACATCTAGCAGGTGTTTCATCAATTTTGGGAGCAGTAAAT…	TTCTTCCACGATCATACATTAATAATTATATTAATAATCATCACAACCGTTATATACATGATAACCACCCTACTTTGAAATAAACATACTAGACGATTCATACTAGAAGGACAACTAATTGAAACTACATGAACAATTGCACCAGCAATTATCTTAGTATTCATTGCAATACCATCCTTACGACTTCTATATCTAATAGACGAAATCCACAACCCAACAATAACCCTAAAAGCAGTGGGACATCAATGATACTGAAGATATGAATATTCAGACTTCACAAAATTAGAATTTGACTCTTACATAATCCCACAAGAGGAAAATCAAGCAAGAACTTTCCGACTACTAGACACAGATAATCGAATTGTACTACCCATAAATTCACCAATCCGACTAGTAGTG…	ACATCACTTAGAATACTAATTCGAACAGAACTAGGGCAACCCGGATCTCTAATTGGAGATGACCAGATCTACAACGTTATCGTTACTGCTCATGCATTCGTCATAATTTTCTTTATAGTAATACCAATCATGATTGGTGGATTCGGAAACTGATTAGTACCACTTATATTAGGAGCCCCAGACATGGCATTCCCACGAATAAACAACATAAGATTTTGATTACTCCCACCGTCATTAACATTACTACTTACTAGCAGAACAGTAGAAAGTGGAGCAGGGACAGGATGAACAGTCTACCCCCCTCTTGCGAGAGGTATTGCCCATGCAGGAGCATCCGTAGACTTAGCCATCTTCTCCTTACATCTAGCAGGTGTTTCATCAATTTTGGGAGCAGTAAAT…
16	5	19	ACATCACTTAGAATGCTAATTCGAACAGAACTAGGGCAACCCGGATCTCTAATTGGAGATGACCAGATCTACAACGTTATCGTTACTGCTCATGCATTCGTCATAATTTTCTTTATAGTCATACCAATCATGATTGGTGGATTCGGAAACTGATTAGTACCACTTATATTAGGAGCCCCAGACATGGCATTCCCACGAATAAACAACATAAGATTTTGATTACTCCCACCATCATTAACATTACTACTTACTAGCAGAACAGTAGAAAGTGGAGCAGGGACAGGATGAACAGTCTACCCCCCTCTTGCGAGAGGTATTGCCCATGCAGGAGCATCCGTAGACTTAGCCATCTTCTCCTTACATCTAGCAGGTGTTTCATCAATTTTGGGAGCAGTAAAT…	TTCTTCCACGATCATACATTAATAATTATATTAATAATCATCACAACCGTTATATACATGATAACCACCCTACTTTGAAATAAACATACTAGACGATTCATACTAGAAGGACAACTAATTGAAACTACATGAACAATTGCACCAGCAATTATCTTAGTATTCATTGCAATACCATCCTTACGACTTCTATATCTAATAGACGAAATCCACAACCCAACAATAACCCTAAAAGCAGTGGGACATCAATGATACTGAAGATATGAATATTCAGACTTCACAAAATTAGAATTCGACTCTTACATAATCCCACAAGAGGAAAATCAAGCAAGAACTTTCCGACTACTAGACACAGATAATCGAATTGTACTACCCATAAATTCACCAATCCGACTAGTAGTG…	ACATCACTTAGAATGCTAATTCGAACAGAACTAGGGCAACCCGGATCTCTAATTGGAGATGACCAGATCTACAACGTTATCGTTACTGCTCATGCATTCGTCATAATTTTCTTTATAGTCATACCAATCATGATTGGTGGATTCGGAAACTGATTAGTACCACTTATATTAGGAGCCCCAGACATGGCATTCCCACGAATAAACAACATAAGATTTTGATTACTCCCACCATCATTAACATTACTACTTACTAGCAGAACAGTAGAAAGTGGAGCAGGGACAGGATGAACAGTCTACCCCCCTCTTGCGAGAGGTATTGCCCATGCAGGAGCATCCGTAGACTTAGCCATCTTCTCCTTACATCTAGCAGGTGTTTCATCAATTTTGGGAGCAGTAAAT…
1	12	20	ACATCACTTAGAATACTAATTCGAACAGAACTAGGGCAACCCGGATCTCTAATTGGAGATGACCAGATCTACAACGTTATCGTTACTGCTCATGCATTCGTCATAATTTTCTTTATAGTCATACCAATCATGATTGGTGGATTCGGAAACTGATTAGTACCACTTATATTAGGAGCCCCAGACATGGCATTCCCACGAATAAACAACATAAGATTTTGATTACTCCCACCGTCATTAACATTACTACTTACTAGCAGAACAGTAGAAAGTGGAGCAGGGACAGGATGAACAGTCTACCCCCCTCTTGCGAGAGGTATTGCCCATGCAGGAGCATCCGTAGACTTAGCCATCTTCTCCTTACATCTAGCAGGTGTTTCATCAATTTTGGGAGCAGTAAAT…	TTCTTCCACGATCATACATTAATAATTATATTAATAATCATCACAACCGTTATATACATGATAACCACCCTACTTTGAAATAAACATACTAGACGATTCATACTAGAAGGACAACTAATTGAAACTACATGAACAATTGCACCAGCAATTATCTTAGTATTCATTGCAATACCATCCTTACGACTTCTATATCTAATAGACGAAATCCACAACCCAACAATAACCCTAAAAGCAGTGGGACATCAATGATACTGAAGATATGAATATTCAGACTTCACAAAATTAGAATTCGACTCTTACATAATCCCACAAGAGGAAAATCAAGCAAGAACCTTCCGACTACTAGACACAGATAATCGAATTGTACTACCCATAAATTCACCAATCCGACTAGTAGTG…	ACATCACTTAGAATACTAATTCGAACAGAACTAGGGCAACCCGGATCTCTAATTGGAGATGACCAGATCTACAACGTTATCGTTACTGCTCATGCATTCGTCATAATTTTCTTTATAGTCATACCAATCATGATTGGTGGATTCGGAAACTGATTAGTACCACTTATATTAGGAGCCCCAGACATGGCATTCCCACGAATAAACAACATAAGATTTTGATTACTCCCACCGTCATTAACATTACTACTTACTAGCAGAACAGTAGAAAGTGGAGCAGGGACAGGATGAACAGTCTACCCCCCTCTTGCGAGAGGTATTGCCCATGCAGGAGCATCCGTAGACTTAGCCATCTTCTCCTTACATCTAGCAGGTGTTTCATCAATTTTGGGAGCAGTAAAT…
17	13	21	ACATCACTTAGAATACTAATTCGAACAGAACTAGGGCAACCCGGATCTCTAATTGGAGATGACCAGATCTACAACGTTATCGTTACTGCTCATGCATTCGTCATAATTTTCTTTATGGTCATACCAATCATGATTGGTGGATTCGGAAACTGACTAGTACCACTTATATTAGGAGCCCCAGACATGGCATTCCCACGAATAAACAACATAAGATTTTGATTACTCCCACCGTCATTAACATTACTACTTACTAGCAGAACAGTAGAAAGTGGAGCAGGGACAGGATGAACAGTTTACCCCCCTCTTGCGAGAGGTATTGCCCATGCAGGAGCATCCGTAGACTTAGCCATCTTCTCCTTACATCTAGCAGGTGTTTCATCAATTTTGGGAGCAGTAAAT…	TTCTTCCACGATCATACATTAATAATTATATTAATAATCATCACAACCGTTATATACATGATAACCACCCTACTTTGAAATAAACATACTAGACGATTCATACTAGAAGGACAACTAATTGAAACTACATGAACAATTGCACCAGCAATTATCTTAGTATTCATTGCAATACCATCCTTACGACTCCTATATCTAATAGACGAAATCCACAACCCAACAATAACCCTAAAAGCAGTAGGACATCAATGATACTGAAGATATGAATATTCAGACTTCACAAAATTAGAATTCGACTCTTACATAATCCCACAAGAGGAAAATCAAGCAAGAACTTTCCGACTACTAGACACAGATAATCGAATTGTACTACCCATAAATTCACCAATCCGACTAGTAGTG…	ACATCACTTAGAATACTAATTCGAACAGAACTAGGGCAACCCGGATCTCTAATTGGAGATGACCAGATCTACAACGTTATCGTTACTGCTCATGCATTCGTCATAATTTTCTTTATGGTCATACCAATCATGATTGGTGGATTCGGAAACTGACTAGTACCACTTATATTAGGAGCCCCAGACATGGCATTCCCACGAATAAACAACATAAGATTTTGATTACTCCCACCGTCATTAACATTACTACTTACTAGCAGAACAGTAGAAAGTGGAGCAGGGACAGGATGAACAGTTTACCCCCCTCTTGCGAGAGGTATTGCCCATGCAGGAGCATCCGTAGACTTAGCCATCTTCTCCTTACATCTAGCAGGTGTTTCATCAATTTTGGGAGCAGTAAAT…
18	7	22	ACATCACTTAGTATACTAATTCGAACAGAACTAGGGCAACCCGGATCTCTAATTGGAGATGACCAGATCTACAACGTTATCGTTACTGCTCATGCATTCGTCATAATTTTCTTTATGGTCATACCAATCATGATTGGTGGATTTGGAAACTGACTAGTACCACTTATATTAGGAGCCCCAGACATGGCATTCCCACGAATAAACAACATAAGATTTTGATTACTCCCACCATCATTAACATTACTACTTACTAGCAGAACAGTAGAAAGTGGAGCAGGGACAGGATGAACAGTTTACCCCCCTCTTGCGAGAGGTATTGCCCATGCAGGAGCATCCGTAGACTTAGCCATCTTCTCCTTACATCTAGCAGGTGTTTCATCAATTTTGGGAGCAGTAAAT…	TTCTTCCACGATCATACATTAATAATTATATTAATAATCATCACAACCGTTATATACATAATAACCACCCTACTTTGAAATAAACATACTAGACGATTCATACTAGAAGGACAACTAATTGAAACTACATGAACAATTGCACCAGCAATTATCTTAGTATTCATTGCAATACCATCCTTACGACTCCTATATCTAATAGACGAAATCCACAACCCAACAATAACCCTAAAAGCAGTAGGACATCAATGATACTGAAGATATGAATATTCAGACTTCACAAAATTAGAATTCGACTCTTACATAATCCCACAAGAGGAAAATCAAGCAAGAACTTTCCGACTACTAGACACAGATAATCGAATTGTACTACCCATAAATTCACCAATCCGACTAGTAGTG…	ACATCACTTAGTATACTAATTCGAACAGAACTAGGGCAACCCGGATCTCTAATTGGAGATGACCAGATCTACAACGTTATCGTTACTGCTCATGCATTCGTCATAATTTTCTTTATGGTCATACCAATCATGATTGGTGGATTTGGAAACTGACTAGTACCACTTATATTAGGAGCCCCAGACATGGCATTCCCACGAATAAACAACATAAGATTTTGATTACTCCCACCATCATTAACATTACTACTTACTAGCAGAACAGTAGAAAGTGGAGCAGGGACAGGATGAACAGTTTACCCCCCTCTTGCGAGAGGTATTGCCCATGCAGGAGCATCCGTAGACTTAGCCATCTTCTCCTTACATCTAGCAGGTGTTTCATCAATTTTGGGAGCAGTAAAT…
19	14	23	ACATCACTCAGAATACTAATTCGAACAGAACTAGGGCAACCCGGATCTCTAATTGGAGATGACCAGATCTACAACGTTATCGTTACTGCTCATGCATTCGTCATAATTTTCTTTATAGTCATACCAATCATGATTGGTGGATTCGGAAACTGATTAGTACCACTTATATTAGGAGCCCCAGACATGGCATTCCCACGAATAAACAACATAAGATTTTGATTACTCCCACCGTCATTAACATTATTACTTACTAGCAGAACAGTAGAAAGTGGAGCAGGGACAGGATGAACAGTCTACCCCCCTCTTGCGAGAGGTATTGCCCATGCAGGAGCATCCGTAGACTTAGCCATCTTCTCCTTACATCTAGCAGGTGTTTCATCAATTTTGGGAGCAGTAAAT…	TTCTTCCACGATCATACATTAATAATTATATTAATAATCATCACAACCGTTATATACATGATAACCACCCTACTTTGAAACAAACATACTAGACGATTCATACTAGAAGGACAACTAATTGAAACTACATGAACAATTGCACCAGCAATTATCTTAGTATTCATTGCAATACCATCCTTACGACTTCTATATCTAATAGACGAAATCCACAACCCAACAATAACCCTAAAAGCAGTGGGACATCAATGATACTGAAGATATGAATATTCAGACTTCACAAAATTAGAATTTGACTCTTACATAATCCCACAAGAGGAAAATCAAGCAAGAACTTTCCGACTACTAGACACAGATAATCGAATTGTACTACCCATAAATTCACCAATCCGACTAGTAGTA…	ACATCACTCAGAATACTAATTCGAACAGAACTAGGGCAACCCGGATCTCTAATTGGAGATGACCAGATCTACAACGTTATCGTTACTGCTCATGCATTCGTCATAATTTTCTTTATAGTCATACCAATCATGATTGGTGGATTCGGAAACTGATTAGTACCACTTATATTAGGAGCCCCAGACATGGCATTCCCACGAATAAACAACATAAGATTTTGATTACTCCCACCGTCATTAACATTATTACTTACTAGCAGAACAGTAGAAAGTGGAGCAGGGACAGGATGAACAGTCTACCCCCCTCTTGCGAGAGGTATTGCCCATGCAGGAGCATCCGTAGACTTAGCCATCTTCTCCTTACATCTAGCAGGTGTTTCATCAATTTTGGGAGCAGTAAAT…
20	5	24	ACATCACTTAGAATACTAATTCGAACAGAACTAGGGCAACCCGGATCTCTAATTGGAGATGACCAGATCTACAACGTTATCGTTACTGCTCATGCATTCGTCATAATTTTCTTTATAGTCATACCAATCATGATTGGTGGATTCGGGAACTGATTAGTACCACTTATATTAGGAGCCCCAGACATGGCATTCCCACGAATAAACAACATAAGATTTTGATTACTCCCACCGTCATTAACATTACTACTTACTAGCAGAACAGTAGAAAGTGGAGCAGGGACAGGATGAACAGTCTACCCCCCTCTTGCGAGAGGTATTGCCCATGCAGGAGCATCCGTAGACTTAGCCATCTTCTCCTTACATCTAGCAGGTGTTTCATCAATTTTGGGAGCAGTAAAT…	TTCTTCCACGATCATACATTAATAATTATATTAATAATCATCACAACCGTTATATACATGATAACCACCCTACTTTGAAATAAACATACTAGACGATTCATACTAGAAGGACAACTAATTGAAACTACATGAACAATTGCACCAGCAATTATCTTAGTATTCATTGCAATACCATCCTTACGACTTCTATATCTAATAGACGAAATCCACAACCCAACAATAACCCTAAAAGCAGTGGGACATCAATGATACTGAAGATATGAATATTCAGACTTCACAAAATTAGAATTCGACTCTTACATAATCCCACAAGAGGAAAATCAAGCAAGAACTTTCCGACTACTAGACACAGATAATCGAATTGTACTACCCATAAATTCACCAATCCGACTAGTAGTG…	ACATCACTTAGAATACTAATTCGAACAGAACTAGGGCAACCCGGATCTCTAATTGGAGATGACCAGATCTACAACGTTATCGTTACTGCTCATGCATTCGTCATAATTTTCTTTATAGTCATACCAATCATGATTGGTGGATTCGGGAACTGATTAGTACCACTTATATTAGGAGCCCCAGACATGGCATTCCCACGAATAAACAACATAAGATTTTGATTACTCCCACCGTCATTAACATTACTACTTACTAGCAGAACAGTAGAAAGTGGAGCAGGGACAGGATGAACAGTCTACCCCCCTCTTGCGAGAGGTATTGCCCATGCAGGAGCATCCGTAGACTTAGCCATCTTCTCCTTACATCTAGCAGGTGTTTCATCAATTTTGGGAGCAGTAAAT…
21	15	25	ACATCACTTAGAATACTAATTCGAACAGAACTAGGACAACCCGGATCTCTAATTGGAGATGACCAGATCTACAACGTTATCGTTACCGCTCATGCATTCGTCATAATTTTCTTTATGGTCATACCAATCATGATTGGTGGATTTGGAAACTGACTAGTACCACTTATATTAGGAGCCCCAGACATGGCATTCCCACGAATAAACAACATAAGATTTTGATTACTCCCACCATCATTAACATTACTACTTACTAGCAGAACAGTAGAAAGTGGAGCAGGGACAGGATGAACAGTTTACCCCCCTCTTGCGAGAGGTATTGCCCACGCAGGAGCATCCGTAGACTTAGCCATCTTCTCCTTACATCTAGCAGGTGTTTCATCAATTTTGGGAGCAGTAAAT…	TTCTTTCACGATCATACATTAATAATTATATTAATAATCATCACAACCGTTATATACATAATAACCACCCTGCTTTGAAATAAACACACCAGACGATTCATACTAGAAGGACAACTAATTGAAACTACATGAACAATTGCACCAGCAATTATCCTAGTATTCATTGCAATACCATCCTTACGACTTCTATATCTAATAGACGAAATCCACAACCCAACAATAACCCTAAAGGCAGTAGGACATCAATGATACTGAAGATATGAATACTCAGACTTCACAAAATTAGAATTCGACTCTTACATAATCCCACAAGAGGAAAATCAAGCAAGAGCTTTCCGACTACTAGACACAGATAATCGAATTGTACTACCCATAAATTCACCAATCCGACTGGTAGTG…	ACATCACTTAGAATACTAATTCGAACAGAACTAGGACAACCCGGATCTCTAATTGGAGATGACCAGATCTACAACGTTATCGTTACCGCTCATGCATTCGTCATAATTTTCTTTATGGTCATACCAATCATGATTGGTGGATTTGGAAACTGACTAGTACCACTTATATTAGGAGCCCCAGACATGGCATTCCCACGAATAAACAACATAAGATTTTGATTACTCCCACCATCATTAACATTACTACTTACTAGCAGAACAGTAGAAAGTGGAGCAGGGACAGGATGAACAGTTTACCCCCCTCTTGCGAGAGGTATTGCCCACGCAGGAGCATCCGTAGACTTAGCCATCTTCTCCTTACATCTAGCAGGTGTTTCATCAATTTTGGGAGCAGTAAAT…
22	16	26	ACATCACTTAGAATACTAATTCGAACAGAACTAGGGCAACCCGGATCTCTAATTGGAGATGACCAGATCTATAACGTCATCGTTACTGCTCATGCATTCGTCATAATTTTCTTTATGGTCATACCAATCATGATTGGTGGATTCGGAAACTGACTAGTACCACTTATATTAGGGGCCCCAGACATAGCATTCCCACGAATAAACAACATAAGATTTTGATTACTCCCACCATCATTAACACTACTACTTACTAGCAGAACAGTAGAAAGTGGAGCAGGGACAGGATGAACAGTTTACCCCCCTCTTGCGAGAGGTATTGCCCATGCAGGAGCATCCGTAGACTTAGCCATCTTCTCCTTACATCTAGCAGGTGTTTCATCAATTTTGGGAGCAGTAAAT…	TTCTTCCACGATCATACATTAATAATCATATTAATAATCATCACAACCGTTATATACATAATAACCACCCTACTTTGAAATAAACACACCAGACGATTCATACTAGAAGGACAACTAATTGAAACTACATGAACAATTGCACCAGCAATCATCCTAGTATTCATTGCAATACCATCCTTACGACTTCTATATCTAATAGACGAAATCCACAACCCAACAATAACCCTAAAGGCAGTAGGACATCAATGATACTGAAGATATGAATACTCAGACTTCACAAAATTAGAATTCGACTCTTACATAATCCCACAAGAGGAAAATCAAGCAAGAACTTTCCGACTACTAGACACAGATAATCGAATTGTACTACCCATAAATTCACCAATCCGACTGGTAGTG…	ACATCACTTAGAATACTAATTCGAACAGAACTAGGGCAACCCGGATCTCTAATTGGAGATGACCAGATCTATAACGTCATCGTTACTGCTCATGCATTCGTCATAATTTTCTTTATGGTCATACCAATCATGATTGGTGGATTCGGAAACTGACTAGTACCACTTATATTAGGGGCCCCAGACATAGCATTCCCACGAATAAACAACATAAGATTTTGATTACTCCCACCATCATTAACACTACTACTTACTAGCAGAACAGTAGAAAGTGGAGCAGGGACAGGATGAACAGTTTACCCCCCTCTTGCGAGAGGTATTGCCCATGCAGGAGCATCCGTAGACTTAGCCATCTTCTCCTTACATCTAGCAGGTGTTTCATCAATTTTGGGAGCAGTAAAT…
23	17	27	ACATCACTTAGAATACTAATTCGAACAGAACTAGGGCAACCCGGATCTCTAATTGGAGATGACCAGATCTACAACGTTATCGTTACTGCTCATGCATTCGTCATAATTTTCTTTATAGTCATACCAATCATGATTGGTGGATTCGGAAACTGATTAGTACCACTTATATTAGGAGCCCCAGACATGGCATTCCCACGAATAAACAACATAAGATTTTGATTACTCCCACCGTCATTAACATTATTACTTACTAGCAGAACAGTAGAAAGTGGAGCAGGGACAGGATGAACAGTCTACCCCCCTCTTGCGAGAGGTATTGCCCATGCAGGAGCATCCGTAGACTTAGCCATCTTCTCCTTACATCTAGCAGGTGTTTCATCAATTTTGGGAGCAGTAAAT…	TTCTTCCACGATCATACATTAATAATTATATTAATAATCATCACAACCGTTATATACATGATAACCACCCTACTTTGAAACAAACATACTAGACGATTCATACTAGAAGGACAACTAATTGAAACTACATGAACAATTGCACCAGCAATTATCTTAGTATTCATTGCAATACCATCCTTACGACTTCTATATCTAATAGACGAAATCCACAACCCAACAATAACCCTAAAAGCAGTGGGACATCAATGATACTGAAGATATGAATATTCAGACTTCACAAAATTAGAATTTGACTCTTACATAATCCCACAAGAGGAAAATCAAGCAAGAACTTTTCGACTACTAGACACAGATAATCGAATTGTACTACCCATAAATTCACCAATCCGACTAGTAGTG…	ACATCACTTAGAATACTAATTCGAACAGAACTAGGGCAACCCGGATCTCTAATTGGAGATGACCAGATCTACAACGTTATCGTTACTGCTCATGCATTCGTCATAATTTTCTTTATAGTCATACCAATCATGATTGGTGGATTCGGAAACTGATTAGTACCACTTATATTAGGAGCCCCAGACATGGCATTCCCACGAATAAACAACATAAGATTTTGATTACTCCCACCGTCATTAACATTATTACTTACTAGCAGAACAGTAGAAAGTGGAGCAGGGACAGGATGAACAGTCTACCCCCCTCTTGCGAGAGGTATTGCCCATGCAGGAGCATCCGTAGACTTAGCCATCTTCTCCTTACATCTAGCAGGTGTTTCATCAATTTTGGGAGCAGTAAAT…
24	5	28	ACATCACTTAGAATACTAATTCGAACAGAACTAGGGCAACCCGGATCTCTAATTGGAGATGACCAGATCTACAACGTTATCGTTACTGCTCATGCATTCGTCATAATTTTCTTTATAGTCATACCAATCATGATTGGTGGATTCGGAAACTGATTAGTACCACTTATATTAGGAGCCCCAGACATGGCATTCCCACGAATAAACAACATAAGATTTTGATTACTCCCACCATCATTAACATTACTACTTACTAGCAGAACAGTAGAAAGTGGAGCAGGGACAGGATGAACAGTCTACCCCCCTCTTGCGAGAGGTATTGCCCATGCAGGAGCATCCGTAGACTTAGCCATCTTCTCCTTACATCTAGCAGGTGTTTCATCAATTTTGGGAGCAGTAAAT…	TTCTTCCACGATCATACATTAATAATTATATTAATAATCATCACAACCGTTATATACATGATAACCACCCTACTTTGAAATAAACATACTAGACGATTCATACTAGAAGGACAACTAATTGAAACTACATGAACAATTGCACCAGCAATTATCTTAGTATTCATTGCAATACCATCCTTACGACTTCTATATCTAATAGACGAAATCCACAACCCAACAATAACCCTAAAAGCAGTGGGACATCAATGATACTGAAGATATGAATATTCAGACTTCACAAAATTAGAATTCGACTCTTACATAATCCCACAAGAGGAAAATCAAGCAAGAACTTTCCGACTACTAGACACAGATAATCGAATTGTACTACCCATAAATTCACCAATCCGACTAGTAGTG…	ACATCACTTAGAATACTAATTCGAACAGAACTAGGGCAACCCGGATCTCTAATTGGAGATGACCAGATCTACAACGTTATCGTTACTGCTCATGCATTCGTCATAATTTTCTTTATAGTCATACCAATCATGATTGGTGGATTCGGAAACTGATTAGTACCACTTATATTAGGAGCCCCAGACATGGCATTCCCACGAATAAACAACATAAGATTTTGATTACTCCCACCATCATTAACATTACTACTTACTAGCAGAACAGTAGAAAGTGGAGCAGGGACAGGATGAACAGTCTACCCCCCTCTTGCGAGAGGTATTGCCCATGCAGGAGCATCCGTAGACTTAGCCATCTTCTCCTTACATCTAGCAGGTGTTTCATCAATTTTGGGAGCAGTAAAT…
25	7	29	ACATCACTTAGTATACTAATTCGAACAGAACTAGGACAACCCGGATCTCTAATTGGAGATGACCAGATCTACAACGTTATCGTTACTGCTCATGCATTCGTCATAATTTTCTTTATGGTCATACCAATCATGATTGGTGGATTTGGAAACTGACTAGTACCACTTATATTAGGAGCCCCAGACATGGCATTCCCACGAATAAACAACATAAGATTTTGATTACTCCCACCATCATTAACATTACTACTTACTAGCAGAACAGTAGAAAGTGGAGCAGGGACAGGATGAACAGTTTACCCCCCTCTTGCGAGAGGTATTGCCCATGCAGGAGCATCCGTAGACTTAGCCATCTTCTCCTTACATCTAGCAGGTGTTTCATCAATTTTGGGAGCAGTAAAT…	TTCTTCCACGATCATACATTAATAATTATATTAATAATCATCACAACCGTTATATACATAATAACCACCCTACTTTGAAATAAACATACTAGACGATTCATACTAGAAGGACAACTAATTGAAACTACATGAACAATTGCACCAGCAATTATCTTAGTATTCATTGCAATACCATCCTTACGACTCCTATATCTAATAGACGAAATCCACAACCCAACAATAACCCTAAAAGCAGTAGGACATCAATGATACTGAAGATATGAATATTCAGACTTCACAAAATTAGAATTCGACTCTTACATAATCCCACAAGAGGAAAATCAAGCAAGAACTTTCCGACTACTAGACACAGATAATCGAATTGTACTACCCATAAATTCACCAATCCGACTAGTAGTG…	ACATCACTTAGTATACTAATTCGAACAGAACTAGGACAACCCGGATCTCTAATTGGAGATGACCAGATCTACAACGTTATCGTTACTGCTCATGCATTCGTCATAATTTTCTTTATGGTCATACCAATCATGATTGGTGGATTTGGAAACTGACTAGTACCACTTATATTAGGAGCCCCAGACATGGCATTCCCACGAATAAACAACATAAGATTTTGATTACTCCCACCATCATTAACATTACTACTTACTAGCAGAACAGTAGAAAGTGGAGCAGGGACAGGATGAACAGTTTACCCCCCTCTTGCGAGAGGTATTGCCCATGCAGGAGCATCCGTAGACTTAGCCATCTTCTCCTTACATCTAGCAGGTGTTTCATCAATTTTGGGAGCAGTAAAT…
26	5	30	ACATCACTTAGAATACTAATTCGAACAGAACTAGGGCAACCCGGATCTCTAATTGGAGATGACCAGATCTACAACGTTATCGTTACTGCTCATGCATTCGTCATAATTTTCTTTATAGTCATACCAATCATGATTGGTGGATTCGGAAACTGATTAGTACCACTTATATTAGGAGCCCCAGACATGGCATTCCCACGAATAAACAACATAAGATTTTGATTACTCCCACCATCATTAACATTACTACTTACTAGCAGAACAGTAGAAAGTGGAGCAGGGACAGGATGAACAGTCTACCCCCCTCTTGCGAGAGGTATTGCCCATGCAGGAGCATCCGTAGACTTAGCCATCTTCTCCTTACATCTAGCAGGTGTTTCATCAATTTTGGGAGCAGTAAAT…	TTCTTCCACGATCATACATTAATAATTATATTAATAATCATCACAACCGTTATATACATGATAACCACCCTACTTTGAAATAAACATACTAGACGATTCATACTAGAAGGACAACTAATTGAAACTACATGAACAATTGCACCAGCAATTATCTTAGTATTCATTGCAATACCATCCTTACGACTTCTATATCTAATAGACGAAATCCACAACCCAACAATAACCCTAAAAGCAGTGGGACATCAATGATACTGAAGATATGAATATTCAGACTTCACAAAATTAGAATTCGACTCTTACATAATCCCACAAGAGGAAAATCAAGCAAGAACTTTCCGACTACTAGACACAGATAATCGAATTGTACTACCCATAAATTCACCAATCCGACTAGTAGTG…	ACATCACTTAGAATACTAATTCGAACAGAACTAGGGCAACCCGGATCTCTAATTGGAGATGACCAGATCTACAACGTTATCGTTACTGCTCATGCATTCGTCATAATTTTCTTTATAGTCATACCAATCATGATTGGTGGATTCGGAAACTGATTAGTACCACTTATATTAGGAGCCCCAGACATGGCATTCCCACGAATAAACAACATAAGATTTTGATTACTCCCACCATCATTAACATTACTACTTACTAGCAGAACAGTAGAAAGTGGAGCAGGGACAGGATGAACAGTCTACCCCCCTCTTGCGAGAGGTATTGCCCATGCAGGAGCATCCGTAGACTTAGCCATCTTCTCCTTACATCTAGCAGGTGTTTCATCAATTTTGGGAGCAGTAAAT…
27	5	31	ACATCACTTAGAATACTAATTCGAACAGAACTAGGGCAACCCGGATCTCTAATTGGAGATGACCAGATCTACAACGTTATCGTTACCGCTCATGCATTCGTCATAATTTTCTTTATAGTCATACCAATCATGATTGGTGGATTCGGAAACTGATTAGTACCACTTATATTAGGAGCCCCAGACATGGCATTCCCACGAATAAACAACATAAGATTTTGATTACTCCCACCGTCATTAACATTACTACTTACTAGCAGAACAGTAGAAAGTGGAGCAGGGACAGGATGAACAGTCTACCCCCCTCTTGCGAGAGGTATTGCCCATGCAGGAGCATCCGTAGACTTAGCCATCTTCTCCTTACATCTAGCAGGCGTTTCATCAATTTTGGGAGCAGTAAAT…	TTCTTCCACGATCATACATTAATAATTATATTAATAATCATCACAACCGTTATATACATGATAACCACCCTACTTTGAAATAAACATACTAGACGATTCATACTAGAAGGACAACTAATTGAAACTACATGAACAATTGCACCAGCAATTATCTTAGTATTCATTGCAATACCATCCTTACGACTTCTATATCTAATAGACGAAATCCACAACCCAACAATAACCCTAAAAGCAGTGGGACATCAATGATACTGAAGATATGAATATTCAGACTTCACAAAATTAGAATTCGACTCTTACATAATCCCACAAGAGGAAAATCAAGCAAGAACTTTCCGACTACTAGACACAGATAATCGAATTGTACTACCCATAAATTCACCAATCCGACTAGTAGTG…	ACATCACTTAGAATACTAATTCGAACAGAACTAGGGCAACCCGGATCTCTAATTGGAGATGACCAGATCTACAACGTTATCGTTACCGCTCATGCATTCGTCATAATTTTCTTTATAGTCATACCAATCATGATTGGTGGATTCGGAAACTGATTAGTACCACTTATATTAGGAGCCCCAGACATGGCATTCCCACGAATAAACAACATAAGATTTTGATTACTCCCACCGTCATTAACATTACTACTTACTAGCAGAACAGTAGAAAGTGGAGCAGGGACAGGATGAACAGTCTACCCCCCTCTTGCGAGAGGTATTGCCCATGCAGGAGCATCCGTAGACTTAGCCATCTTCTCCTTACATCTAGCAGGCGTTTCATCAATTTTGGGAGCAGTAAAT…
28	18	32	ACATCACTTAGAATACTAATTCGAACAGAACTAGGGCAACCCGGATCTCTAATTGGAGATGACCAGATCTACAACGTTATCGTTACTGCTCATGCATTCGTCATAATTTTCTTTATAGTCATACCAATCATGATTGGTGGATTCGGAAACTGATTAGTACCACTTATATTAGGAGCCCCAGACATGGCATTCCCACGAATAAACAACATAAGATTTTGATTACTCCCACCATCATTAACATTACTACTTACTAGCAGAACAGTAGAAAGTGGAGCAGGGACAGGATGAACAGTCTACCCCCCTCTTGCGAGAGGTATTGCCCATGCAGGAGCATCCGTAGACCTAGCCATCTTCTCCTTACATCTAGCAGGTGTTTCATCAATTTTGGGAGCAGTAAAT…	TTCTTCCACGATCATACATTAATAATTATATTAATAATCATCACAACCGTTATATACATGATAACCACCCTACTTTGAAATAAACATACTAGACGATTCATACTAGAAGGACAATTAATTGAAACTACATGAACAATTGCACCAGCAATTATCTTAGTATTCATTGCAATACCATCCTTACGACTTCTATATCTAATAGACGAAATCCACAACCCAACAATAACCCTAAAAGCAGTGGGACATCAATGATACTGAAGATATGAATATTCAGACTTCACAAAATTAGAATTCGACTCTTACATAATCCCACAAGAGGAAAATCAAGCAAGAACTTTCCGACTACTAGACACAGATAATCGAATTGTACTACCCATAAATTCACCAATCCGACTAGTAGTG…	ACATCACTTAGAATACTAATTCGAACAGAACTAGGGCAACCCGGATCTCTAATTGGAGATGACCAGATCTACAACGTTATCGTTACTGCTCATGCATTCGTCATAATTTTCTTTATAGTCATACCAATCATGATTGGTGGATTCGGAAACTGATTAGTACCACTTATATTAGGAGCCCCAGACATGGCATTCCCACGAATAAACAACATAAGATTTTGATTACTCCCACCATCATTAACATTACTACTTACTAGCAGAACAGTAGAAAGTGGAGCAGGGACAGGATGAACAGTCTACCCCCCTCTTGCGAGAGGTATTGCCCATGCAGGAGCATCCGTAGACCTAGCCATCTTCTCCTTACATCTAGCAGGTGTTTCATCAATTTTGGGAGCAGTAAAT…
Out-Group
Out1	Out1	Out1	ACATCACTCAGAATACTAATTCGGACAGAATTAGGACAACCTGGATCTCTAATTGGAGACGACCAGATCTACAACGTTATCGTTACCGCCCACGCATTTGTTATGATTTTCTTTATGGTTATACCAATCATAATCGGTGGATTCGGGAACTGACTAGTACCACTTATATTAGGAGCCCCAGATATGGCATTCCCACGAATAAATAACATAAGATTTTGATTACTCCCACCATCATTAACACTACTACTTACTAGTAGAACAGTAGAAAGTGGAGCAGGGACGGGATGAACAGTTTACCCTCCTCTTGCAAGAGGAATTGCCCACGCAGGAGCATCCGTAGACTTAGCAATCTTTTCTTTACATTTAGCAGGTGTATCATCAATTCTGGGAGCAGTAAAC…	TTCTTCCATGACCATACATTAATAATTATACTAATAATCATCACAACCGTGATGTACATAATAACCACCCTACTTTGAAATAAACACACCAGACGATTCATATTAGAAGGACAACTAATTGAAACCACATGAACAATTGCACCAGCAATCATCCTAGTATTCATTGCGATACCATCCTTACGACTTCTATATCTAATAGACGAAATCCACAACCCAACAATAACCCTAAAAGCAGTAGGACACCAATGATACTGGAGATATGAATACTCAGACTTCACAAAATTAGAATTTGACTCTTACATAATTCCACAAGAGGAAAATCAAGCAAGAACCTTCCGACTATTAGACACAGACAACCGAATTGTACTACCCATAAATTCACCAATCCGATTAGTAGTA…	ACATCACTCAGAATACTAATTCGGACAGAATTAGGACAACCTGGATCTCTAATTGGAGACGACCAGATCTACAACGTTATCGTTACCGCCCACGCATTTGTTATGATTTTCTTTATGGTTATACCAATCATAATCGGTGGATTCGGGAACTGACTAGTACCACTTATATTAGGAGCCCCAGATATGGCATTCCCACGAATAAATAACATAAGATTTTGATTACTCCCACCATCATTAACACTACTACTTACTAGTAGAACAGTAGAAAGTGGAGCAGGGACGGGATGAACAGTTTACCCTCCTCTTGCAAGAGGAATTGCCCACGCAGGAGCATCCGTAGACTTAGCAATCTTTTCTTTACATTTAGCAGGTGTATCATCAATTCTGGGAGCAGTAAAC…
Out2	Out2	Out2	ACATCACTCAGAATACTAATTCGAACAGAATTAGGACAACCCGGATCTCTAATTGGAGACGACCAGATCTACAATGTTATCGTTACTGCCCACGCATTTGTTATGATTTTCTTTATGGTTATACCAATCATAATTGGTGGATTCGGGAACTGACTAGTACCACTTATGCTAGGAGCCCCGGATATGGCATTCCCACGAATAAACAACATAAGATTTTGATTACTCCCACCATCATTAACACTACTACTCACTAGTAGAACAGTAGAAAGTGGAGCGGGGACTGGATGAACAGTTTACCCCCCTCTTGCAAGAGGGATTGCCCATGCAGGAGCATCCGTAGACTTAGCCATCTTTTCTTTACACTTAGCAGGTGTATCATCAATTCTGGGAGCAGTAAAC…	TTCTTCCACGACCATACATTAATAATTATACTAATAATCATCACAACCGTAATGTACATAATAACCACCCTACTTTGAAACAAACACACTAGACGATTTATATTAGAAGGACAACTAATCGAAACCACATGAACAATTGCACCAGCAATCATCCTAGTATTCATCGCGATACCATCCTTACGACTTCTATATCTAATAGACGAAATCCACAACCCAACAATAACCCTAAAAGCAGTAGGACACCAGTGATACTGAAGATATGAATATTCAGACTTCACAAAATTAGAATTTGACTCTTACATAATTCCACAAGAGGAAAATCAAGCAAGAACCTTCCGACTATTAGACACAGACAACCGAATTGTACTACCCATAAACTCACCAATCCGATTAGTAGTA…	ACATCACTCAGAATACTAATTCGAACAGAATTAGGACAACCCGGATCTCTAATTGGAGACGACCAGATCTACAATGTTATCGTTACTGCCCACGCATTTGTTATGATTTTCTTTATGGTTATACCAATCATAATTGGTGGATTCGGGAACTGACTAGTACCACTTATGCTAGGAGCCCCGGATATGGCATTCCCACGAATAAACAACATAAGATTTTGATTACTCCCACCATCATTAACACTACTACTCACTAGTAGAACAGTAGAAAGTGGAGCGGGGACTGGATGAACAGTTTACCCCCCTCTTGCAAGAGGGATTGCCCATGCAGGAGCATCCGTAGACTTAGCCATCTTTTCTTTACACTTAGCAGGTGTATCATCAATTCTGGGAGCAGTAAAC…
Out3	Out3	Out3	ACATCACTCAGAATACTAATTCGAACAGAATTAGGACAACCTGGTTCTCTGATTGGAGACGATCAGATCTACAACGTCATCGTTACCGCCCACGCATTCGTTATAATCTTCTTTATGGTTATACCAATCATAATTGGTGGATTCGGAAACTGACTAGTACCACTTATATTAGGAGCCCCAGATATGGCATTCCCACGAATAAACAACATAAGATTTTGATTACTCCCACCATCATTAACTCTACTACTCACTAGTAGAACTGTAGAAAGTGGAGCAGGGACGGGATGAACAGTTTATCCCCCTCTTGCAAGAGGTATTGCCCATGCAGGGGCATCTGTAGACTTAGCCATCTTCTCCTTACACCTAGCAGGTGTATCATCAATCCTAGGGGCAGTAAAC…	TTCTTCCACGACCATACATTAATAATTATATTAATAATCATTACAACCGTAATGTACATAATAACCACCCTACTCTGAAATAAGCACACTAGACGATTTATATTAGAAGGACAACTAATTGAAACCACATGAACAATTGCACCGGCAATCATCCTAGTATTCATTGCGATACCATCTTTACGACTTCTATATCTAATAGACGAAATCCATAACCCAACAATAACCCTAAAAGCAGTGGGACACCAATGATACTGGAGATACGAATACTCAGACTTCACAAAATTAGAATTTGACTCTTACATAATTCCACAGGAGGAAAATCAAATAAGAACCTTCCGACTACTAGACACAGACAACCGAATTGTACTGCCCATAAATTCACCAATCCGATTAGTAGTA…	ACATCACTCAGAATACTAATTCGAACAGAATTAGGACAACCTGGTTCTCTGATTGGAGACGATCAGATCTACAACGTCATCGTTACCGCCCACGCATTCGTTATAATCTTCTTTATGGTTATACCAATCATAATTGGTGGATTCGGAAACTGACTAGTACCACTTATATTAGGAGCCCCAGATATGGCATTCCCACGAATAAACAACATAAGATTTTGATTACTCCCACCATCATTAACTCTACTACTCACTAGTAGAACTGTAGAAAGTGGAGCAGGGACGGGATGAACAGTTTATCCCCCTCTTGCAAGAGGTATTGCCCATGCAGGGGCATCTGTAGACTTAGCCATCTTCTCCTTACACCTAGCAGGTGTATCATCAATCCTAGGGGCAGTAAAC…
Out4	Out4	Out4	ACATCACTCAGAATACTAATTCGAACAGAATTAGGACAACCCGGGTCTCTGATTGGAGACGACCAGATCTACAACGTCATCGTTACCGCCCACGCATTTGTTATAATCTTCTTTATGGTTATACCAATCATAATTGGTGGATTCGGAAACTGACTAGTACCACTTATATTAGGAGCCCCAGATATGGCATTCCCACGAATAAACAACATAAGATTTTGATTACTCCCACCATCATTAACTCTACTACTCACTAGTAGAACTGTAGAAAGTGGAGCAGGGACGGGATGAACAGTTTATCCCCCTCTTGCAAGAGGTATTGCCCATGCAGGAGCATCTGTAGACTTAGCCATCTTCTCCCTACACCTAGCAGGTGTATCATCAATCCTAGGGGCAGTAAAC…	TTCTTCCACGACCATACATTAATAATTATATTAATAATCATTACAACCGTAATGTACATAATAACCACCCTACTCTGAAATAAGCACACTAGACGATTTATATTAGAAGGACAACTAATTGAAACCACATGAACAATTGCACCGGCAATCATCCTAGTATTCATTGCGATACCATCTTTACGACTTCTATATCTAATAGACGAAATCCATAACCCAACAATAACCCTAAAAGCAGTAGGACACCAATGATACTGGAGATACGAATACTCAGACTTCACAAAATTAGAATTTGACTCTTACATAATTCCACAGGAGGAAAATCAAACAAGAACCTTCCGACTACTAGACACAGACAACCGAATTGTACTCCCCATAAATTCACCAATCCGATTAGTAGTA…	ACATCACTCAGAATACTAATTCGAACAGAATTAGGACAACCCGGGTCTCTGATTGGAGACGACCAGATCTACAACGTCATCGTTACCGCCCACGCATTTGTTATAATCTTCTTTATGGTTATACCAATCATAATTGGTGGATTCGGAAACTGACTAGTACCACTTATATTAGGAGCCCCAGATATGGCATTCCCACGAATAAACAACATAAGATTTTGATTACTCCCACCATCATTAACTCTACTACTCACTAGTAGAACTGTAGAAAGTGGAGCAGGGACGGGATGAACAGTTTATCCCCCTCTTGCAAGAGGTATTGCCCATGCAGGAGCATCTGTAGACTTAGCCATCTTCTCCCTACACCTAGCAGGTGTATCATCAATCCTAGGGGCAGTAAAC…
Out5	Out5	Out5	ACATCACTCAGAATACTAATTCGAACAGAATTAGGACAACCCGGGTCTCTGATTGGAGACGACCAGATCTACAACGTTATCGTTACCGCCCACGCATTTGTTATAATCTTCTTTATGGTTATACCAATCATAATTGGTGGATTCGGAAACTGACTAGTACCACTTATATTAGGAGCCCCAGATATGGCATTCCCACGAATAAACAACATAAGATTTTGATTACTCCCACCATCATTAACTCTACTACTCACTAGTAGAACTGTAGAAAGTGGAGCAGGGACGGGATGAACAGTTTATCCCCCTCTTGCAAGAGGTATTGCCCATGCAGGAGCATCTGTAGACTTAGCCATCTTCTCCCTACACCTAGCAGGTGTATCATCAATCCTAGGGGCAGTAAAC…	TTCTTCCACGACCATACATTAATAATTATATTAATAATCATTACAACCGTAATGTACATAATAACCACCCTACTCTGAAATAAGCACACTAGACGATTTATATTAGAAGGACAACTAATTGAAACCACATGAACAATTGCACCGGCAATCATCCTAGTATTCATTGCAATACCATCTTTACGACTTCTATATCTAATAGACGAAATCCATAACCCAACAATAACCCTAAAAGCAGTAGGACACCAATGATACTGGAGATACGAATACTCAGACTTCACAAAATTAGAATTTGACTCTTACATAATTCCACAGGAGGAAAATCAAACAAGAACCTTCCGACTACTAGACACAGACAACCGAATTGTACTGCCCATAAATTCACCAATCCGATTAGTAGTA…	ACATCACTCAGAATACTAATTCGAACAGAATTAGGACAACCCGGGTCTCTGATTGGAGACGACCAGATCTACAACGTTATCGTTACCGCCCACGCATTTGTTATAATCTTCTTTATGGTTATACCAATCATAATTGGTGGATTCGGAAACTGACTAGTACCACTTATATTAGGAGCCCCAGATATGGCATTCCCACGAATAAACAACATAAGATTTTGATTACTCCCACCATCATTAACTCTACTACTCACTAGTAGAACTGTAGAAAGTGGAGCAGGGACGGGATGAACAGTTTATCCCCCTCTTGCAAGAGGTATTGCCCATGCAGGAGCATCTGTAGACTTAGCCATCTTCTCCCTACACCTAGCAGGTGTATCATCAATCCTAGGGGCAGTAAAC…

## Sheet: nuc_haplotypes
Eb14g_hap	Eb14g_seq
1	AGTGTCATCTTTAAGTCACAACAACCCATTATTTAACTGATTTCTTACTAAATTTTGTACGTTACTAGGGCTGTGACTGATTACTTTCACTGCAAACTGAAACTACAACCGTCTGTATGAGGAACAAGTTACATTTTTTCACTGCTTAAAACAACGGCAGCCGAAGGGACATATTTGCACCAGTTCCATCCAGTCCAAACACACACATAACGATTTATCCAGACACATATCAACGTTATTACGTGACCATC
2	AGTGTCATCTTTAAGTCACAACAACCCATTATTTAACTGATTTCTTACTAAATTTTGTACGTTACTAGGGCTGTGACTGATTACTTTCACTGCAAACTGAAACTACAACCGTCTGTATGAGGAACAAGTTACATTTTTTCACTGCTTAAAACAACGGCAGCCGAAGGGACATATTTGCACCAGTTCCATCCAGTCCAAACACACACATAACGATTTTTCCAGACACATTTCAACGTTATTACGTGACCATC
3	AGTGTCATCTTTAAGTCACAACAACCCATTATTTAACTGATTTCTTACTAAATTTTGTACGTTACTAGGGCTGTGACTGATTACTTTCACTGCAAACTGAAACTACAACCGTCTGTATGAGGAACAAGTTACATTTTTTCACTGCTTAAAACAACGGCAGCCGACGGGACATATTTGCACCAGTTCCATCCAGTCCAAACACACACATAACGATTTTTCCAGACACATTTCAACGTTATTACGTGACCATC
4	AGTGTCATCTTTAAGTCACAACAACCCATTATTTAACTGATTTCTTACTAAATTTTGTACGTTACTAGGGCTGTGACTGATTACTTTCACTGCAAACTGAAACTACAACCGTCTGTATGAGGAACAAGTTACATTTTTTCACTGCTTAAAACAACGGCAGCCGACGGGACATATTTGCACCAGTTCCATCCAGTCCTAACACACACATAACGATTTTTCCAGACACATTTCAACGTTATTACGTGACCATC
5	AGTGTCATCTTTAAGTCACAACAACCCATTATTTAACTGATTTCTTACTAAATTTTGTACGTTACTAGGGCTGTGACTGATTACTTTCACTGCAAACTGAAACTACAACCGTCTGTATGAGGAACAAGTTACATTTTTTTACTGCTTAAAACAACGGCAGCCGACGGGACATATTTGCACCAGTTCCATCCAGTCCAAACACACACATAACGATTTTTCCAGACACATTTCAACGTTATTACGTGACCATC
Out-Group
Out1	AGTGTCATCTTTAAGTCACAACAACCCATTATTTAACTGATTTCTTACTAAATTTTGTACGTTACTAGGGCTGTGACTGATTACTTTCACTGCAAACTGAAACTACAACCGTCTGTATGAGGAACAAGTTACATTTTTTCACTGCTTAAAACAACGGCAGCCGACGGGACATATTTGCACCAGTTCCATCCAGTCCAAACACACACATAACGATTTATCCAGACACATTTCAACGTTATTACGTGACCATC
Out2	AGTGTCATCTTTAAGTCACAACAACCCATTATTTAACTGATTTCTTACTAAATTTTGTACGTTACTAGGGCTGTGACTGATTACTTTCACTGCAAACTGAAACTACAACCGTCTGTATGAGGAACAAGTTACATTTTTTCACTGCTTAAAACAACGGCAGCCGACGGGACATATTTGCACCAGTTCCATCCAGTCAAAACACACACATAACGATTTATCCAGACACATTTCAACGTTATTACGTGACCATC
Out3	AGTGTCATCTTTAAGTCACAACAACCCATTACTTAACTGATTTCTTACTAAATTTTGTACGTTACTAGGGCTGTGACTGATTACTTTCACTGCAAACTGAAACTACAACCGTCTGTATGAGGAACAAGTTACATTTTTTCACTGCTTAAAACAACGGCAGCCGACGGGACATATTTGCACCAGTTCCATCCAGTCAAAACACACACATAACGATTTATCCAGACACATTTCAACGTTATTACGTGACCATC
