# Supplementary material for: The role of glacial‐interglacial climate change in shaping the genetic structure of eastern subterranean termites in the southern Appalachian Mountains, USA
Source: Ecol Evol. 2019 Apr 1;9(8):4621–36. doi: 10.1002/ece3.5065 (PMC6476779; doi:10.1002/ece3.5065)
Supplement: Supplementary file 3 [file ECE3-9-4621-s003.xlsx]

## Sheet: Description
Posterior probabilities of scenarios in two-tier comparisons, type I (alpha, false positive) and type II (beta, false negative) error rates for "winning" scenarios (with highest posterior probabilities) in each step of each tier. The first tier has two steps (step 1: refugial scenarios; step 2: distributional shift scenarios). Tier 2 only has one step, but the winning scenarios from tier 1 are co…
type I (α):	false positive = reject true H0
type II (β):	false negative = fail to reject false H0
	H0:
Tier1-Step1	Scen. 3
Tier1-Step2	Scen. 1
Tier2_incl.V	Scen. 1
Tier2_excl.V	Scen. 1

## Sheet: Tier1-Step1_R
True Scen.	Logistic	Match True/Logistic	Error	Rate (Scen. 3)		Legend
1	3	0	type I (α)	0.031		DS = Distributional Shift
1	3	0	type II (β)	0.027		R = Refugium
1	5	0				V = Vicariance
3	1	0
3	1	0				Scenario #	Scenario Code	Evol. History	Post. Prob.
3	1	0				1	R1	S-N;S-C	0.103
3	1	0				2	R2	S-C;S-N	0.014
3	2	0				3	R3	N-S;N-C	0.861
3	2	0				4	R4	N-C;N-S	0.013
3	4	0				5	R5	C-S;C-N	0.006
3	4	0				6	R6	C-N;C-S	0.003
3	4	0
3	5	0
3	5	0				Model w/ Highest Posterior Prob.
3	5	0
3	5	0
1	1	1
1	1	1
1	1	1
1	1	1
1	1	1
1	1	1
1	1	1
1	1	1
1	1	1
1	1	1
1	1	1
1	1	1
1	1	1
1	1	1
1	1	1
1	1	1
1	1	1
1	1	1
1	1	1
1	1	1
1	1	1
1	1	1
1	1	1
1	1	1
1	1	1
1	1	1
1	1	1
1	1	1
1	1	1
1	1	1
1	1	1
1	1	1
1	1	1
1	1	1
1	1	1
1	1	1
1	1	1
1	1	1
1	1	1
1	1	1
1	1	1
1	1	1
1	1	1
1	1	1
1	1	1
1	1	1
1	1	1
1	1	1
1	1	1
1	1	1
1	1	1
1	1	1
1	1	1
1	1	1
1	1	1
1	1	1
1	1	1
1	1	1
1	1	1
1	1	1
1	1	1
1	1	1
1	1	1
1	1	1
1	1	1
1	1	1
1	1	1
1	1	1
1	1	1
1	1	1
1	1	1
1	1	1
3	3	1
3	3	1
3	3	1
3	3	1
3	3	1
3	3	1
3	3	1
3	3	1
3	3	1
3	3	1
3	3	1
3	3	1
3	3	1
3	3	1
3	3	1
3	3	1
3	3	1
3	3	1
3	3	1
3	3	1
3	3	1
3	3	1
3	3	1
3	3	1
3	3	1
3	3	1
3	3	1
3	3	1
3	3	1
3	3	1
3	3	1
3	3	1
3	3	1
3	3	1
3	3	1
3	3	1
3	3	1
3	3	1
3	3	1
3	3	1
3	3	1
3	3	1
3	3	1
3	3	1
3	3	1
3	3	1
3	3	1
3	3	1
3	3	1
3	3	1
3	3	1
3	3	1
3	3	1
3	3	1
3	3	1
3	3	1
3	3	1
3	3	1
3	3	1
3	3	1
3	3	1
3	3	1
3	3	1
3	3	1
3	3	1
3	3	1
3	3	1
3	3	1
3	3	1
3	3	1
3	3	1
3	3	1
3	3	1
3	3	1
3	3	1
3	3	1
3	3	1
3	3	1
3	3	1
3	3	1
3	3	1
3	3	1
3	3	1
3	3	1
3	3	1
3	3	1
3	3	1
3	3	1
3	3	1
3	3	1
3	3	1
3	3	1
3	3	1
3	3	1
3	3	1
3	3	1
3	3	1
3	3	1
3	3	1
3	3	1
3	3	1
3	3	1
3	3	1
3	3	1
3	3	1
3	3	1
3	3	1
3	3	1
3	3	1
3	3	1
3	3	1
3	3	1
3	3	1
3	3	1
3	3	1
3	3	1
3	3	1
3	3	1
3	3	1
3	3	1
3	3	1
3	3	1
3	3	1
3	3	1
3	3	1
3	3	1
3	3	1
3	3	1
3	3	1
3	3	1
3	3	1
3	3	1
3	3	1
3	3	1
3	3	1
3	3	1
3	3	1
3	3	1
3	3	1
3	3	1
3	3	1
3	3	1
3	3	1
3	3	1
3	3	1
3	3	1
3	3	1
3	3	1
3	3	1
3	3	1
3	3	1
3	3	1
3	3	1
3	3	1
3	3	1
3	3	1
3	3	1
3	3	1
3	3	1
3	3	1
3	3	1
3	3	1
3	3	1
3	3	1
3	3	1
3	3	1
3	3	1
3	3	1
3	3	1
3	3	1
3	3	1
3	3	1
3	3	1
3	3	1
3	3	1
3	3	1
3	3	1
3	3	1
3	3	1
3	3	1
3	3	1
3	3	1
3	3	1
3	3	1
3	3	1
3	3	1
3	3	1
3	3	1
3	3	1
3	3	1
3	3	1
3	3	1
3	3	1
3	3	1
3	3	1
3	3	1
3	3	1
3	3	1
3	3	1
3	3	1
3	3	1
3	3	1
3	3	1
3	3	1
3	3	1
3	3	1
3	3	1
3	3	1
3	3	1
3	3	1
3	3	1
3	3	1
3	3	1
3	3	1
3	3	1
3	3	1
3	3	1
3	3	1
3	3	1
3	3	1
3	3	1
3	3	1
3	3	1
3	3	1
3	3	1
3	3	1
3	3	1
3	3	1
3	3	1
3	3	1
3	3	1
3	3	1
3	3	1
3	3	1
3	3	1
3	3	1
3	3	1
3	3	1
3	3	1
3	3	1
3	3	1
3	3	1
3	3	1
3	3	1
3	3	1
3	3	1
3	3	1
3	3	1
3	3	1
3	3	1
3	3	1
3	3	1
3	3	1
3	3	1
3	3	1
3	3	1
3	3	1
3	3	1
3	3	1
3	3	1
3	3	1
3	3	1
3	3	1
3	3	1
3	3	1
3	3	1
3	3	1
3	3	1
3	3	1
3	3	1
3	3	1
3	3	1
3	3	1
3	3	1
3	3	1
3	3	1
3	3	1
3	3	1
3	3	1
3	3	1
3	3	1
3	3	1
3	3	1
3	3	1
3	3	1
3	3	1
3	3	1
3	3	1
3	3	1
3	3	1
3	3	1
3	3	1
3	3	1
3	3	1
3	3	1
3	3	1
3	3	1
3	3	1
3	3	1
3	3	1
3	3	1
3	3	1
3	3	1
3	3	1
3	3	1
3	3	1
3	3	1
3	3	1
3	3	1
3	3	1
3	3	1
3	3	1
3	3	1
3	3	1
3	3	1
3	3	1
3	3	1
3	3	1
3	3	1
3	3	1
3	3	1
3	3	1
3	3	1
3	3	1
3	3	1
3	3	1
3	3	1
3	3	1
3	3	1
3	3	1
3	3	1
3	3	1
3	3	1
3	3	1
3	3	1
3	3	1
3	3	1
3	3	1
3	3	1
3	3	1
3	3	1
3	3	1
3	3	1
3	3	1
3	3	1
3	3	1
3	3	1
3	3	1
3	3	1
3	3	1
3	3	1
3	3	1
3	3	1
3	3	1
3	3	1
3	3	1
3	3	1
3	3	1
3	3	1
3	3	1
3	3	1
3	3	1
3	3	1
3	3	1
3	3	1
3	3	1
3	3	1
3	3	1
3	3	1
3	3	1
3	3	1
3	3	1
3	3	1
3	3	1
3	3	1
3	3	1
3	3	1
3	3	1
3	3	1
3	3	1
3	3	1
3	3	1
3	3	1
3	3	1
3	3	1
3	3	1
3	3	1
3	3	1
3	3	1
3	3	1
3	3	1
3	3	1
3	3	1
3	3	1
3	3	1
3	3	1
3	3	1
3	3	1
3	3	1
3	3	1
3	3	1
3	3	1
3	3	1
3	3	1
3	3	1
3	3	1
3	3	1
3	3	1
3	3	1
3	3	1
3	3	1
3	3	1

## Sheet: Tier1-Step2_DS
True Scen.	Logistic	Match True/Logistic	Error	Rate (Scen. 1)		Legend
1	2	0	type I (α)	0.026		DS = Distributional Shift
1	2	0	type II (β)	0.023		R = Refugium
1	2	0				V = Vicariance
1	2	0
1	2	0				Scenario #	Scenario Code	Evol. History	Post. Prob.
1	2	0				1	DS1	S-N;N-C	0.932
1	2	0				2	DS2	S-C;C-N	0.002
1	2	0				3	DS3	N-S;S-C	0.064
1	2	0				4	DS4	N-C;C-S	0.002
1	2	0				5	DS5	C-S;S-N	0
1	2	0				6	DS6	C-N;N-S	0
1	4	0
3	1	0
3	2	0				Model w/ Highest Posterior Prob.
3	4	0
3	4	0
1	1	1
1	1	1
1	1	1
1	1	1
1	1	1
1	1	1
1	1	1
1	1	1
1	1	1
1	1	1
1	1	1
1	1	1
1	1	1
1	1	1
1	1	1
1	1	1
1	1	1
1	1	1
1	1	1
1	1	1
1	1	1
1	1	1
1	1	1
1	1	1
1	1	1
1	1	1
1	1	1
1	1	1
1	1	1
1	1	1
1	1	1
1	1	1
1	1	1
1	1	1
1	1	1
1	1	1
1	1	1
1	1	1
1	1	1
1	1	1
1	1	1
1	1	1
1	1	1
1	1	1
1	1	1
1	1	1
1	1	1
1	1	1
1	1	1
1	1	1
1	1	1
1	1	1
1	1	1
1	1	1
1	1	1
1	1	1
1	1	1
1	1	1
1	1	1
1	1	1
1	1	1
1	1	1
1	1	1
1	1	1
1	1	1
1	1	1
1	1	1
1	1	1
1	1	1
1	1	1
1	1	1
1	1	1
1	1	1
1	1	1
1	1	1
1	1	1
1	1	1
1	1	1
1	1	1
1	1	1
1	1	1
1	1	1
1	1	1
1	1	1
1	1	1
1	1	1
1	1	1
1	1	1
1	1	1
1	1	1
1	1	1
1	1	1
1	1	1
1	1	1
1	1	1
1	1	1
1	1	1
1	1	1
1	1	1
1	1	1
1	1	1
1	1	1
1	1	1
1	1	1
1	1	1
1	1	1
1	1	1
1	1	1
1	1	1
1	1	1
1	1	1
1	1	1
1	1	1
1	1	1
1	1	1
1	1	1
1	1	1
1	1	1
1	1	1
1	1	1
1	1	1
1	1	1
1	1	1
1	1	1
1	1	1
1	1	1
1	1	1
1	1	1
1	1	1
1	1	1
1	1	1
1	1	1
1	1	1
1	1	1
1	1	1
1	1	1
1	1	1
1	1	1
1	1	1
1	1	1
1	1	1
1	1	1
1	1	1
1	1	1
1	1	1
1	1	1
1	1	1
1	1	1
1	1	1
1	1	1
1	1	1
1	1	1
1	1	1
1	1	1
1	1	1
1	1	1
1	1	1
1	1	1
1	1	1
1	1	1
1	1	1
1	1	1
1	1	1
1	1	1
1	1	1
1	1	1
1	1	1
1	1	1
1	1	1
1	1	1
1	1	1
1	1	1
1	1	1
1	1	1
1	1	1
1	1	1
1	1	1
1	1	1
1	1	1
1	1	1
1	1	1
1	1	1
1	1	1
1	1	1
1	1	1
1	1	1
1	1	1
1	1	1
1	1	1
1	1	1
1	1	1
1	1	1
1	1	1
1	1	1
1	1	1
1	1	1
1	1	1
1	1	1
1	1	1
1	1	1
1	1	1
1	1	1
1	1	1
1	1	1
1	1	1
1	1	1
1	1	1
1	1	1
1	1	1
1	1	1
1	1	1
1	1	1
1	1	1
1	1	1
1	1	1
1	1	1
1	1	1
1	1	1
1	1	1
1	1	1
1	1	1
1	1	1
1	1	1
1	1	1
1	1	1
1	1	1
1	1	1
1	1	1
1	1	1
1	1	1
1	1	1
1	1	1
1	1	1
1	1	1
1	1	1
1	1	1
1	1	1
1	1	1
1	1	1
1	1	1
1	1	1
1	1	1
1	1	1
1	1	1
1	1	1
1	1	1
1	1	1
1	1	1
1	1	1
1	1	1
1	1	1
1	1	1
1	1	1
1	1	1
1	1	1
1	1	1
1	1	1
1	1	1
1	1	1
1	1	1
1	1	1
1	1	1
1	1	1
1	1	1
1	1	1
1	1	1
1	1	1
1	1	1
1	1	1
1	1	1
1	1	1
1	1	1
1	1	1
1	1	1
1	1	1
1	1	1
1	1	1
1	1	1
1	1	1
1	1	1
1	1	1
1	1	1
1	1	1
1	1	1
1	1	1
1	1	1
1	1	1
1	1	1
1	1	1
1	1	1
1	1	1
1	1	1
1	1	1
1	1	1
1	1	1
1	1	1
1	1	1
1	1	1
1	1	1
1	1	1
1	1	1
1	1	1
1	1	1
1	1	1
1	1	1
1	1	1
1	1	1
1	1	1
1	1	1
1	1	1
1	1	1
1	1	1
1	1	1
1	1	1
1	1	1
1	1	1
1	1	1
1	1	1
1	1	1
1	1	1
1	1	1
1	1	1
1	1	1
1	1	1
1	1	1
1	1	1
1	1	1
1	1	1
1	1	1
1	1	1
1	1	1
1	1	1
1	1	1
1	1	1
1	1	1
1	1	1
1	1	1
1	1	1
1	1	1
1	1	1
1	1	1
1	1	1
1	1	1
1	1	1
1	1	1
1	1	1
1	1	1
1	1	1
1	1	1
1	1	1
1	1	1
1	1	1
1	1	1
1	1	1
1	1	1
1	1	1
1	1	1
1	1	1
1	1	1
1	1	1
1	1	1
1	1	1
1	1	1
1	1	1
1	1	1
1	1	1
1	1	1
1	1	1
1	1	1
1	1	1
1	1	1
1	1	1
1	1	1
1	1	1
1	1	1
1	1	1
1	1	1
1	1	1
1	1	1
1	1	1
1	1	1
1	1	1
1	1	1
1	1	1
1	1	1
1	1	1
1	1	1
1	1	1
1	1	1
1	1	1
1	1	1
1	1	1
1	1	1
1	1	1
1	1	1
1	1	1
1	1	1
1	1	1
1	1	1
1	1	1
1	1	1
1	1	1
1	1	1
1	1	1
1	1	1
1	1	1
1	1	1
1	1	1
1	1	1
1	1	1
1	1	1
1	1	1
1	1	1
1	1	1
1	1	1
1	1	1
1	1	1
1	1	1
1	1	1
1	1	1
1	1	1
1	1	1
1	1	1
1	1	1
1	1	1
1	1	1
1	1	1
1	1	1
1	1	1
1	1	1
1	1	1
1	1	1
1	1	1
1	1	1
1	1	1
1	1	1
1	1	1
1	1	1
1	1	1
1	1	1
1	1	1
1	1	1
1	1	1
1	1	1
3	3	1
3	3	1
3	3	1
3	3	1
3	3	1
3	3	1
3	3	1
3	3	1
3	3	1
3	3	1
3	3	1
3	3	1
3	3	1
3	3	1
3	3	1
3	3	1
3	3	1
3	3	1
3	3	1
3	3	1
3	3	1
3	3	1
3	3	1
3	3	1
3	3	1
3	3	1
3	3	1
3	3	1
3	3	1
3	3	1
3	3	1
3	3	1
3	3	1
3	3	1
3	3	1
3	3	1
3	3	1
3	3	1
4	4	1
5	5	1

## Sheet: Tier2_DS-R-incl.V
True Scen.	Logistic	Match True/Logistic	Error	Rate (Scen. 1)		Legend
1	2	0	type I (α)	0.509		DS = Distributional Shift
1	2	0	type II (β)	0.328		R = Refugium
1	2	0				V = Vicariance
1	2	0
1	2	0				Scenario #	Scenario Code	Evol. History	Post. Prob.
1	2	0				1	DS1	S-N;N-C	0.495
1	2	0				2	R3	N-S;N-C	0.332
1	2	0				3	V	N/S;N-C	0.173
1	2	0
1	2	0
1	2	0				Model w/ Highest Posterior Prob.
1	2	0
1	2	0
1	2	0
1	2	0
1	2	0
1	2	0
1	2	0
1	2	0
1	2	0
1	2	0
1	2	0
1	2	0
1	2	0
1	2	0
1	2	0
1	2	0
1	2	0
1	2	0
1	2	0
1	2	0
1	2	0
1	2	0
1	2	0
1	2	0
1	2	0
1	2	0
1	2	0
1	2	0
1	2	0
1	2	0
1	2	0
1	2	0
1	2	0
1	2	0
1	2	0
1	2	0
1	2	0
1	2	0
1	2	0
1	2	0
1	2	0
1	2	0
1	2	0
1	2	0
1	2	0
1	2	0
1	2	0
1	2	0
1	2	0
1	3	0
1	3	0
1	3	0
1	3	0
1	3	0
1	3	0
1	3	0
1	3	0
1	3	0
1	3	0
1	3	0
1	3	0
1	3	0
1	3	0
1	3	0
1	3	0
1	3	0
1	3	0
1	3	0
1	3	0
1	3	0
1	3	0
1	3	0
1	3	0
1	3	0
1	3	0
1	3	0
2	1	0
2	1	0
2	1	0
2	1	0
2	1	0
2	1	0
2	1	0
2	1	0
2	1	0
2	1	0
2	1	0
2	1	0
2	1	0
2	1	0
2	1	0
2	1	0
2	1	0
2	1	0
2	1	0
2	1	0
2	1	0
2	1	0
2	1	0
2	1	0
2	1	0
2	1	0
2	1	0
2	1	0
2	1	0
2	1	0
2	1	0
2	1	0
2	1	0
2	1	0
2	1	0
2	1	0
2	1	0
2	1	0
2	1	0
2	1	0
2	1	0
2	1	0
2	1	0
2	1	0
2	1	0
2	1	0
2	1	0
2	1	0
2	1	0
2	1	0
2	3	0
2	3	0
2	3	0
2	3	0
2	3	0
2	3	0
2	3	0
2	3	0
2	3	0
2	3	0
2	3	0
2	3	0
2	3	0
2	3	0
2	3	0
2	3	0
2	3	0
2	3	0
2	3	0
2	3	0
2	3	0
2	3	0
2	3	0
2	3	0
2	3	0
2	3	0
2	3	0
2	3	0
3	1	0
3	1	0
3	1	0
3	1	0
3	1	0
3	1	0
3	1	0
3	1	0
3	1	0
3	1	0
3	1	0
3	1	0
3	1	0
3	1	0
3	1	0
3	1	0
3	1	0
3	1	0
3	1	0
3	1	0
3	1	0
3	1	0
3	1	0
3	1	0
3	1	0
3	1	0
3	1	0
3	1	0
3	1	0
3	1	0
3	1	0
3	1	0
3	1	0
3	1	0
3	1	0
3	1	0
3	1	0
3	1	0
3	1	0
3	1	0
3	1	0
3	1	0
3	1	0
3	1	0
3	1	0
3	1	0
3	1	0
3	1	0
3	1	0
3	1	0
3	1	0
3	1	0
3	1	0
3	1	0
3	1	0
3	1	0
3	1	0
3	1	0
3	2	0
3	2	0
3	2	0
3	2	0
3	2	0
3	2	0
3	2	0
3	2	0
3	2	0
3	2	0
3	2	0
3	2	0
3	2	0
3	2	0
3	2	0
3	2	0
3	2	0
3	2	0
3	2	0
3	2	0
3	2	0
3	2	0
3	2	0
3	2	0
3	2	0
3	2	0
3	2	0
3	2	0
3	2	0
3	2	0
3	2	0
3	2	0
3	2	0
3	2	0
3	2	0
3	2	0
3	2	0
3	2	0
3	2	0
3	2	0
3	2	0
3	2	0
3	2	0
3	2	0
3	2	0
3	2	0
3	2	0
3	2	0
3	2	0
3	2	0
3	2	0
3	2	0
3	2	0
3	2	0
3	2	0
1	1	1
1	1	1
1	1	1
1	1	1
1	1	1
1	1	1
1	1	1
1	1	1
1	1	1
1	1	1
1	1	1
1	1	1
1	1	1
1	1	1
1	1	1
1	1	1
1	1	1
1	1	1
1	1	1
1	1	1
1	1	1
1	1	1
1	1	1
1	1	1
1	1	1
1	1	1
1	1	1
1	1	1
1	1	1
1	1	1
1	1	1
1	1	1
1	1	1
1	1	1
1	1	1
1	1	1
1	1	1
1	1	1
1	1	1
1	1	1
1	1	1
1	1	1
1	1	1
1	1	1
1	1	1
1	1	1
1	1	1
1	1	1
1	1	1
1	1	1
1	1	1
1	1	1
1	1	1
1	1	1
1	1	1
1	1	1
1	1	1
1	1	1
1	1	1
1	1	1
1	1	1
1	1	1
1	1	1
1	1	1
1	1	1
1	1	1
1	1	1
1	1	1
1	1	1
1	1	1
1	1	1
1	1	1
1	1	1
1	1	1
1	1	1
1	1	1
1	1	1
1	1	1
1	1	1
1	1	1
1	1	1
1	1	1
1	1	1
1	1	1
2	2	1
2	2	1
2	2	1
2	2	1
2	2	1
2	2	1
2	2	1
2	2	1
2	2	1
2	2	1
2	2	1
2	2	1
2	2	1
2	2	1
2	2	1
2	2	1
2	2	1
2	2	1
2	2	1
2	2	1
2	2	1
2	2	1
2	2	1
2	2	1
2	2	1
2	2	1
2	2	1
2	2	1
2	2	1
2	2	1
2	2	1
2	2	1
2	2	1
2	2	1
2	2	1
2	2	1
2	2	1
2	2	1
2	2	1
2	2	1
2	2	1
2	2	1
2	2	1
2	2	1
2	2	1
2	2	1
2	2	1
2	2	1
2	2	1
2	2	1
2	2	1
2	2	1
2	2	1
2	2	1
2	2	1
2	2	1
2	2	1
2	2	1
2	2	1
2	2	1
2	2	1
2	2	1
2	2	1
2	2	1
2	2	1
2	2	1
2	2	1
2	2	1
2	2	1
2	2	1
2	2	1
2	2	1
2	2	1
2	2	1
2	2	1
2	2	1
2	2	1
2	2	1
2	2	1
2	2	1
2	2	1
2	2	1
2	2	1
2	2	1
2	2	1
2	2	1
2	2	1
2	2	1
2	2	1
2	2	1
2	2	1
2	2	1
2	2	1
2	2	1
2	2	1
2	2	1
2	2	1
3	3	1
3	3	1
3	3	1
3	3	1
3	3	1
3	3	1
3	3	1
3	3	1
3	3	1
3	3	1
3	3	1
3	3	1
3	3	1
3	3	1
3	3	1
3	3	1
3	3	1
3	3	1
3	3	1
3	3	1
3	3	1
3	3	1
3	3	1
3	3	1
3	3	1
3	3	1
3	3	1
3	3	1
3	3	1
3	3	1
3	3	1
3	3	1
3	3	1
3	3	1
3	3	1
3	3	1
3	3	1
3	3	1
3	3	1
3	3	1
3	3	1

## Sheet: Tier2_DS-R-incl.V_I&II-allScen.
True Scen.	Logistic	Match True/Logistic		Scenario	Type I error rate	Type II error rate
1	2	0		DS1	0.509	0.328
1	2	0		R3	0.446	0.354
1	2	0		V	0.734	0.159
1	2	0
1	2	0
1	2	0
1	2	0
1	2	0
1	2	0
1	2	0
1	2	0
1	2	0
1	2	0
1	2	0
1	2	0
1	2	0
1	2	0
1	2	0
1	2	0
1	2	0
1	2	0
1	2	0
1	2	0
1	2	0
1	2	0
1	2	0
1	2	0
1	2	0
1	2	0
1	2	0
1	2	0
1	2	0
1	2	0
1	2	0
1	2	0
1	2	0
1	2	0
1	2	0
1	2	0
1	2	0
1	2	0
1	2	0
1	2	0
1	2	0
1	2	0
1	2	0
1	2	0
1	2	0
1	2	0
1	2	0
1	2	0
1	2	0
1	2	0
1	2	0
1	2	0
1	2	0
1	2	0
1	2	0
1	2	0
1	2	0
1	3	0
1	3	0
1	3	0
1	3	0
1	3	0
1	3	0
1	3	0
1	3	0
1	3	0
1	3	0
1	3	0
1	3	0
1	3	0
1	3	0
1	3	0
1	3	0
1	3	0
1	3	0
1	3	0
1	3	0
1	3	0
1	3	0
1	3	0
1	3	0
1	3	0
1	3	0
1	3	0
2	1	0
2	1	0
2	1	0
2	1	0
2	1	0
2	1	0
2	1	0
2	1	0
2	1	0
2	1	0
2	1	0
2	1	0
2	1	0
2	1	0
2	1	0
2	1	0
2	1	0
2	1	0
2	1	0
2	1	0
2	1	0
2	1	0
2	1	0
2	1	0
2	1	0
2	1	0
2	1	0
2	1	0
2	1	0
2	1	0
2	1	0
2	1	0
2	1	0
2	1	0
2	1	0
2	1	0
2	1	0
2	1	0
2	1	0
2	1	0
2	1	0
2	1	0
2	1	0
2	1	0
2	1	0
2	1	0
2	1	0
2	1	0
2	1	0
2	1	0
2	3	0
2	3	0
2	3	0
2	3	0
2	3	0
2	3	0
2	3	0
2	3	0
2	3	0
2	3	0
2	3	0
2	3	0
2	3	0
2	3	0
2	3	0
2	3	0
2	3	0
2	3	0
2	3	0
2	3	0
2	3	0
2	3	0
2	3	0
2	3	0
2	3	0
2	3	0
2	3	0
2	3	0
3	1	0
3	1	0
3	1	0
3	1	0
3	1	0
3	1	0
3	1	0
3	1	0
3	1	0
3	1	0
3	1	0
3	1	0
3	1	0
3	1	0
3	1	0
3	1	0
3	1	0
3	1	0
3	1	0
3	1	0
3	1	0
3	1	0
3	1	0
3	1	0
3	1	0
3	1	0
3	1	0
3	1	0
3	1	0
3	1	0
3	1	0
3	1	0
3	1	0
3	1	0
3	1	0
3	1	0
3	1	0
3	1	0
3	1	0
3	1	0
3	1	0
3	1	0
3	1	0
3	1	0
3	1	0
3	1	0
3	1	0
3	1	0
3	1	0
3	1	0
3	1	0
3	1	0
3	1	0
3	1	0
3	1	0
3	1	0
3	1	0
3	1	0
3	2	0
3	2	0
3	2	0
3	2	0
3	2	0
3	2	0
3	2	0
3	2	0
3	2	0
3	2	0
3	2	0
3	2	0
3	2	0
3	2	0
3	2	0
3	2	0
3	2	0
3	2	0
3	2	0
3	2	0
3	2	0
3	2	0
3	2	0
3	2	0
3	2	0
3	2	0
3	2	0
3	2	0
3	2	0
3	2	0
3	2	0
3	2	0
3	2	0
3	2	0
3	2	0
3	2	0
3	2	0
3	2	0
3	2	0
3	2	0
3	2	0
3	2	0
3	2	0
3	2	0
3	2	0
3	2	0
3	2	0
3	2	0
3	2	0
3	2	0
3	2	0
3	2	0
3	2	0
3	2	0
3	2	0
1	1	1
1	1	1
1	1	1
1	1	1
1	1	1
1	1	1
1	1	1
1	1	1
1	1	1
1	1	1
1	1	1
1	1	1
1	1	1
1	1	1
1	1	1
1	1	1
1	1	1
1	1	1
1	1	1
1	1	1
1	1	1
1	1	1
1	1	1
1	1	1
1	1	1
1	1	1
1	1	1
1	1	1
1	1	1
1	1	1
1	1	1
1	1	1
1	1	1
1	1	1
1	1	1
1	1	1
1	1	1
1	1	1
1	1	1
1	1	1
1	1	1
1	1	1
1	1	1
1	1	1
1	1	1
1	1	1
1	1	1
1	1	1
1	1	1
1	1	1
1	1	1
1	1	1
1	1	1
1	1	1
1	1	1
1	1	1
1	1	1
1	1	1
1	1	1
1	1	1
1	1	1
1	1	1
1	1	1
1	1	1
1	1	1
1	1	1
1	1	1
1	1	1
1	1	1
1	1	1
1	1	1
1	1	1
1	1	1
1	1	1
1	1	1
1	1	1
1	1	1
1	1	1
1	1	1
1	1	1
1	1	1
1	1	1
1	1	1
1	1	1
2	2	1
2	2	1
2	2	1
2	2	1
2	2	1
2	2	1
2	2	1
2	2	1
2	2	1
2	2	1
2	2	1
2	2	1
2	2	1
2	2	1
2	2	1
2	2	1
2	2	1
2	2	1
2	2	1
2	2	1
2	2	1
2	2	1
2	2	1
2	2	1
2	2	1
2	2	1
2	2	1
2	2	1
2	2	1
2	2	1
2	2	1
2	2	1
2	2	1
2	2	1
2	2	1
2	2	1
2	2	1
2	2	1
2	2	1
2	2	1
2	2	1
2	2	1
2	2	1
2	2	1
2	2	1
2	2	1
2	2	1
2	2	1
2	2	1
2	2	1
2	2	1
2	2	1
2	2	1
2	2	1
2	2	1
2	2	1
2	2	1
2	2	1
2	2	1
2	2	1
2	2	1
2	2	1
2	2	1
2	2	1
2	2	1
2	2	1
2	2	1
2	2	1
2	2	1
2	2	1
2	2	1
2	2	1
2	2	1
2	2	1
2	2	1
2	2	1
2	2	1
2	2	1
2	2	1
2	2	1
2	2	1
2	2	1
2	2	1
2	2	1
2	2	1
2	2	1
2	2	1
2	2	1
2	2	1
2	2	1
2	2	1
2	2	1
2	2	1
2	2	1
2	2	1
2	2	1
2	2	1
3	3	1
3	3	1
3	3	1
3	3	1
3	3	1
3	3	1
3	3	1
3	3	1
3	3	1
3	3	1
3	3	1
3	3	1
3	3	1
3	3	1
3	3	1
3	3	1
3	3	1
3	3	1
3	3	1
3	3	1
3	3	1
3	3	1
3	3	1
3	3	1
3	3	1
3	3	1
3	3	1
3	3	1
3	3	1
3	3	1
3	3	1
3	3	1
3	3	1
3	3	1
3	3	1
3	3	1
3	3	1
3	3	1
3	3	1
3	3	1
3	3	1

## Sheet: Tier2_DS-R-excl.V
True Scen.	Logistic	Match True/Logistic	Error	Rate (Scen. 1)		Legend
1	2	0	type I (α)	0.454		DS = Distributional Shift
1	2	0	type II (β)	0.373		R = Refugium
1	2	0				V = Vicariance
1	2	0
1	2	0				Scenario #	Scenario Code	Evol. History	Post. Prob.
1	2	0				1	DS1	S-N;N-C	0.576
1	2	0				2	R3	N-S;N-C	0.424
1	2	0
1	2	0
1	2	0				Model w/ Highest Posterior Prob.
1	2	0
1	2	0
1	2	0
1	2	0
1	2	0
1	2	0
1	2	0
1	2	0
1	2	0
1	2	0
1	2	0
1	2	0
1	2	0
1	2	0
1	2	0
1	2	0
1	2	0
1	2	0
1	2	0
1	2	0
1	2	0
1	2	0
1	2	0
1	2	0
1	2	0
1	2	0
1	2	0
1	2	0
1	2	0
1	2	0
1	2	0
1	2	0
1	2	0
1	2	0
1	2	0
1	2	0
1	2	0
1	2	0
1	2	0
1	2	0
1	2	0
1	2	0
1	2	0
1	2	0
1	2	0
1	2	0
1	2	0
1	2	0
1	2	0
1	2	0
1	2	0
1	2	0
1	2	0
1	2	0
1	2	0
1	2	0
1	2	0
1	2	0
1	2	0
1	2	0
1	2	0
1	2	0
1	2	0
1	2	0
1	2	0
1	2	0
1	2	0
1	2	0
1	2	0
1	2	0
1	2	0
1	2	0
1	2	0
1	2	0
1	2	0
1	2	0
1	2	0
1	2	0
1	2	0
1	2	0
1	2	0
1	2	0
1	2	0
1	2	0
1	2	0
1	2	0
1	2	0
1	2	0
1	2	0
1	2	0
1	2	0
1	2	0
1	2	0
1	2	0
2	1	0
2	1	0
2	1	0
2	1	0
2	1	0
2	1	0
2	1	0
2	1	0
2	1	0
2	1	0
2	1	0
2	1	0
2	1	0
2	1	0
2	1	0
2	1	0
2	1	0
2	1	0
2	1	0
2	1	0
2	1	0
2	1	0
2	1	0
2	1	0
2	1	0
2	1	0
2	1	0
2	1	0
2	1	0
2	1	0
2	1	0
2	1	0
2	1	0
2	1	0
2	1	0
2	1	0
2	1	0
2	1	0
2	1	0
2	1	0
2	1	0
2	1	0
2	1	0
2	1	0
2	1	0
2	1	0
2	1	0
2	1	0
2	1	0
2	1	0
2	1	0
2	1	0
2	1	0
2	1	0
2	1	0
2	1	0
2	1	0
2	1	0
2	1	0
2	1	0
2	1	0
2	1	0
2	1	0
2	1	0
2	1	0
2	1	0
2	1	0
2	1	0
2	1	0
2	1	0
2	1	0
2	1	0
2	1	0
2	1	0
2	1	0
2	1	0
2	1	0
2	1	0
2	1	0
2	1	0
2	1	0
2	1	0
2	1	0
2	1	0
2	1	0
2	1	0
2	1	0
2	1	0
2	1	0
2	1	0
2	1	0
2	1	0
2	1	0
2	1	0
2	1	0
2	1	0
2	1	0
2	1	0
2	1	0
2	1	0
2	1	0
1	1	1
1	1	1
1	1	1
1	1	1
1	1	1
1	1	1
1	1	1
1	1	1
1	1	1
1	1	1
1	1	1
1	1	1
1	1	1
1	1	1
1	1	1
1	1	1
1	1	1
1	1	1
1	1	1
1	1	1
1	1	1
1	1	1
1	1	1
1	1	1
1	1	1
1	1	1
1	1	1
1	1	1
1	1	1
1	1	1
1	1	1
1	1	1
1	1	1
1	1	1
1	1	1
1	1	1
1	1	1
1	1	1
1	1	1
1	1	1
1	1	1
1	1	1
1	1	1
1	1	1
1	1	1
1	1	1
1	1	1
1	1	1
1	1	1
1	1	1
1	1	1
1	1	1
1	1	1
1	1	1
1	1	1
1	1	1
1	1	1
1	1	1
1	1	1
1	1	1
1	1	1
1	1	1
1	1	1
1	1	1
1	1	1
1	1	1
1	1	1
1	1	1
1	1	1
1	1	1
1	1	1
1	1	1
1	1	1
1	1	1
1	1	1
1	1	1
1	1	1
1	1	1
1	1	1
1	1	1
1	1	1
1	1	1
1	1	1
1	1	1
1	1	1
1	1	1
1	1	1
1	1	1
1	1	1
1	1	1
1	1	1
1	1	1
1	1	1
1	1	1
1	1	1
1	1	1
1	1	1
1	1	1
1	1	1
1	1	1
1	1	1
1	1	1
1	1	1
1	1	1
1	1	1
1	1	1
1	1	1
1	1	1
1	1	1
1	1	1
1	1	1
1	1	1
1	1	1
1	1	1
1	1	1
1	1	1
1	1	1
1	1	1
1	1	1
1	1	1
1	1	1
1	1	1
1	1	1
1	1	1
1	1	1
2	2	1
2	2	1
2	2	1
2	2	1
2	2	1
2	2	1
2	2	1
2	2	1
2	2	1
2	2	1
2	2	1
2	2	1
2	2	1
2	2	1
2	2	1
2	2	1
2	2	1
2	2	1
2	2	1
2	2	1
2	2	1
2	2	1
2	2	1
2	2	1
2	2	1
2	2	1
2	2	1
2	2	1
2	2	1
2	2	1
2	2	1
2	2	1
2	2	1
2	2	1
2	2	1
2	2	1
2	2	1
2	2	1
2	2	1
2	2	1
2	2	1
2	2	1
2	2	1
2	2	1
2	2	1
2	2	1
2	2	1
2	2	1
2	2	1
2	2	1
2	2	1
2	2	1
2	2	1
2	2	1
2	2	1
2	2	1
2	2	1
2	2	1
2	2	1
2	2	1
2	2	1
2	2	1
2	2	1
2	2	1
2	2	1
2	2	1
2	2	1
2	2	1
2	2	1
2	2	1
2	2	1
2	2	1
2	2	1
2	2	1
2	2	1
2	2	1
2	2	1
2	2	1
2	2	1
2	2	1
2	2	1
2	2	1
2	2	1
2	2	1
2	2	1
2	2	1
2	2	1
2	2	1
2	2	1
2	2	1
2	2	1
2	2	1
2	2	1
2	2	1
2	2	1
2	2	1
2	2	1
2	2	1
2	2	1
2	2	1
2	2	1
2	2	1
2	2	1
2	2	1
2	2	1
2	2	1
2	2	1
2	2	1
2	2	1
2	2	1
2	2	1
2	2	1
2	2	1
2	2	1
2	2	1
2	2	1
2	2	1
2	2	1
2	2	1
2	2	1
2	2	1
2	2	1
2	2	1
2	2	1
2	2	1
2	2	1
2	2	1
2	2	1
2	2	1
2	2	1
2	2	1
2	2	1
2	2	1
2	2	1
2	2	1
2	2	1
2	2	1
2	2	1
2	2	1
2	2	1
2	2	1
2	2	1
2	2	1
2	2	1
2	2	1
2	2	1
2	2	1
2	2	1
2	2	1
2	2	1
2	2	1
2	2	1
2	2	1
2	2	1
2	2	1
2	2	1
2	2	1
2	2	1
2	2	1
2	2	1
2	2	1
2	2	1
2	2	1
2	2	1
2	2	1
2	2	1
2	2	1
2	2	1
2	2	1
2	2	1
